# Supplementary material for: Trends in dyslipidemia prevalence among Uyghur adults of different genders in China: a retrospective cohort study
Source: PeerJ. 2025 May 2;13:e19344. doi: 10.7717/peerj.19344 (PMC12051936; doi:10.7717/peerj.19344)
Supplement: Supplemental Information 1 [file peerj-13-19344-s001.xlsx]

## Sheet: 2021.
sex	age	AGE	education	Marital status	hypertension 2021	CAD	diabetes mellitus	Systolic blood pressure	Diastolic blood pressure	Waist circumference	BMI	heart rate	smoking	drunking	Fasting plasma glucose	Serum creatinine	Blood urea nitrogen	TC	TG	HDL-C	LDL-C	non HDL-C
1	48	3	1	2	0	0	0	105	65	85	22.77	74	0	0	4.5	22.7	4.23	1.59	2.26	0.54	0.13	1.05
2	54	4	1	2	0	0	0	110	65	94	26.56	63	0	0	5.11	10.6	4.13	1.65	0.55	0.59	0.49	1.06
2	73	6	1	2	1	0	0	135	95	100	30.32	78	0	0	4.81	63.6	3.22	1.65	0.55	0.48	0.7	1.17
2	62	5	1	2	0	0	0	115	75	108	32.03	73	0	0	4.21	49.6	5.7	1.7	0.4	0.5	0.3	1.2
2	73	6	1	2	1	0	0	115	85	80	22.99	81	0	0	4.13	10.3	4.38	1.73	0.53	0.56	0.46	1.17
2	52	4	1	2	1	0	0	130	75	85	25.72	84	0	0	4.51	46.8	3.84	1.9	0.88	0.8	1.1	1.1
1	52	4	1	2	0	0	0	125	75	97	28.35	74	0	0	5.1	41.2	4.2	1.9	0.9	0.8	0.4	1.1
1	55	4	1	2	1	0	0	135	75	108	30.49	98	0	0	4.68	14.6	5.2	1.9	1	0.88	0.9	1.02
1	51	4	1	2	0	0	0	125	65	88	28.6	89	0	0	4.65	14.6	5.2	1.9	1.1	0.75	0.8	1.15
1	58	4	1	2	0	0	0	115	75	98	21.87	62	0	0	4.37	92	2.88	1.98	1.1	0.77	0.87	1.21
2	55	4	1	2	0	0	0	100	70	117	31.83	75	0	0	4.5	41.5	5.2	1.98	1.1	0.88	0.98	1.1
1	48	3	1	2	0	0	0	95	65	74	30.48	62	0	0	3.92	52.1	6.38	1.98	1.1	0.9	0.98	1.08
2	62	5	1	2	0	0	0	120	75	80	26.84	80	0	0	4.39	21.6	5.3	1	0.5	0.5	0.06	0.5
1	53	4	1	2	0	0	0	115	75	104	29.75	86	0	0	5.52	91.7	3.07	1	0.8	0.98	0.99	0.02
2	62	5	1	2	1	0	0	110	65	75	19.1	91	0	0	4.99	87	5.45	1	0.9	0.87	1.1	0.13
2	47	3	1	2	0	0	0	95	65	82	24.56	83	0	0	4.37	72	7.12	1	0.9	0.7	0.8	0.3
1	51	4	1	2	1	0	0	140	85	80	24.22	67	0	0	5.23	41.6	4.2	1	0.98	0.8	0.99	0.2
1	65	5	1	2	1	0	0	115	85	86	21.55	86	0	0	5.37	48	5.09	1	0.98	0.88	0.9	0.12
1	63	5	2	2	0	0	0	110	65	85	19.49	72	0	0	4.35	20	20.29	1	1.04	0.49	0.03	0.51
2	55	4	1	2	1	0	0	160	95	76	23.37	78	0	0	4.23	46.3	3.9	1	1.3	0.8	0.6	0.2
2	51	4	2	2	1	0	0	155	95	115	38.96	78	0	0	4.84	26	4.75	1.05	1.53	0.98	2.76	0.07
1	47	3	2	2	0	0	0	115	75	70	20.66	78	0	0	4	21.6	3.6	1.1	0.69	0.98	0.88	0.12
2	51	4	1	2	0	0	0	110	65	90	37.95	88	0	0	4.81	51.7	4.73	1.1	0.87	0.92	0.9	0.18
2	54	4	1	2	0	0	0	110	65	75	22.07	71	0	0	5.09	60	7.69	1.1	0.96	0.8	0.87	0.3
1	49	3	1	2	0	0	0	95	65	78	22.86	67	0	0	6.34	89	8.01	1.1	0.98	0.88	0.7	0.22
1	53	4	1	2	1	0	0	125	75	112	33.56	70	0	0	4.66	64.7	3.59	1.1	0.98	0.9	0.87	0.2
2	53	4	1	2	0	0	0	125	60	80	24.84	75	0	0	4.73	45.2	4.95	1.1	0.98	0.7	0.88	0.4
2	48	3	1	2	0	0	0	115	75	105	32.87	78	0	0	3.97	50.7	3.69	1.1	0.98	0.8	0.9	0.3
1	51	4	1	2	0	0	0	105	65	74	21.78	70	0	0	5.04	63.2	4.9	1.1	0.98	0.88	0.9	0.22
2	53	4	1	2	1	0	0	125	75	120	36.85	111	0	0	4.56	52.6	4.3	1.1	0.98	0.98	0.9	0.12
1	59	4	2	2	1	0	0	115	75	108	32.41	88	0	0	4.32	59.8	4.69	1.1	0.98	0.6	0.9	0.5
2	50	4	1	2	0	0	0	95	65	66	18.97	85	0	0	4.5	41.5	5.2	1.1	0.98	1	1.2	0.1
1	92	6	1	2	0	0	0	105	75	94	22.72	75	0	0	4.2	97	4.45	1.1	0.99	0.7	0.88	0.4
2	48	3	2	2	1	0	0	135	85	104	33.12	85	0	0	4.3	60.8	3.94	1.1	1	0.8	0.98	0.3
1	49	3	2	2	0	0	0	95	65	89	25.15	64	0	0	5.15	87	5.47	1.1	1.6	0.99	0.68	0.11
1	76	6	1	2	1	0	0	155	90	97	26.81	88	0	0	5.24	41.5	3.1	1.1	2	0.8	1.8	0.3
2	53	4	1	2	0	0	0	95	60	74	20.93	67	0	0	5.3	46.2	5.4	1.1	2	0.7	1	0.4
1	53	4	1	2	1	0	0	115	75	88	24.3	84	0	0	5.95	60	6.34	1.1	2	0.98	1.14	0.12
1	55	4	1	2	1	0	0	130	85	99	28.73	88	0	0	7.87	93	3.89	1.1	2	0.8	1.9	0.3
1	57	4	2	2	1	0	0	140	80	109	27.73	71	1	0	4.2	14.2	4.2	1.1	2	1	1.12	0.1
2	61	5	1	2	0	0	0	115	75	79	19.98	85	0	0	5.46	20	4.43	1.12	1.34	0.62	0.18	0.5
1	68	5	1	2	0	0	0	95	65	93	22.91	74	0	0	4.19	16.9	4.8	1.13	1.32	0.84	0.28	0.29
2	76	6	1	2	1	0	0	125	85	104	27.16	82	0	0	7.48	51	3.67	1.19	1.09	0.72	0.72	0.47
2	58	4	1	2	0	0	0	120	70	78	19.44	81	0	0	4.69	58	4.96	1.2	0.3	0.9	0.3	0.3
1	55	4	1	2	1	0	0	140	75	93	25.46	69	0	0	4.38	65.7	5.78	1.2	0.65	0.59	0.88	0.61
2	52	4	1	2	0	0	0	95	65	84	27.89	69	0	0	4.89	45.8	4.17	1.2	0.69	0.8	0.7	0.4
2	52	4	1	2	1	0	0	125	85	85	31.35	87	0	0	5.6	49	3.69	1.2	0.8	0.8	0.98	0.4
2	47	3	1	2	0	0	0	120	75	85	25.89	83	0	0	5.06	55.8	3.12	1.2	0.8	0.7	0.9	0.5
1	47	3	1	2	0	0	0	115	80	95	26.89	75	0	0	4.02	94	7.32	1.2	0.9	0.8	0.88	0.4
2	63	5	1	2	0	0	0	100	60	72	16.85	79	0	0	4.42	43.5	6.4	1.2	0.9	0.77	0.8	0.43
2	54	4	1	2	0	0	0	120	75	96	34.68	82	0	0	4.2	14.63	5.3	1.2	0.9	1	0.87	0.2
1	57	4	1	2	0	0	0	105	65	104	28.31	63	0	0	4.65	44.5	23.5	1.2	0.9	1	0.88	0.2
2	49	3	1	2	0	0	0	120	75	78	23.83	60	0	0	4.21	49.5	3.64	1.2	0.95	0.96	1.3	0.24
1	49	3	1	2	1	1	0	115	85	103	28.33	75	0	0	18.03	50.6	3.06	1.2	0.95	0.92	1.3	0.28
1	57	4	2	2	1	0	0	130	90	93	27.34	71	0	0	5.2	52.3	4.3	1.2	0.96	0.96	1.2	0.24
1	48	3	2	2	0	0	0	115	75	95	25.28	79	1	0	4.92	753	4.83	1.2	0.96	1.1	1.3	0.1
1	72	6	1	2	1	0	0	125	85	76	20.42	69	0	0	3.91	55.1	6.65	1.2	0.96	0.92	1.3	0.28
1	73	6	1	2	0	0	0	100	65	89	24.56	67	0	0	4.29	51.9	3.59	1.2	0.96	0.7	0.87	0.5
1	55	4	1	2	0	0	0	100	65	83	23.15	80	0	0	4.36	41.6	3.6	1.2	0.96	0.78	0.8	0.42
1	71	6	1	2	1	0	0	125	85	104	28.26	91	0	0	6.13	56	6.85	1.2	0.96	0.94	1.3	0.26
1	67	5	2	2	0	0	0	115	75	118	33.08	90	0	0	7.25	87	5	1.2	0.98	0.9	0.96	0.3
2	68	5	1	2	1	0	0	130	75	97	29.36	82	0	0	4.49	67	5.61	1.2	0.98	0.97	0.9	0.23
2	47	3	1	2	0	0	0	115	75	82	26.56	85	0	0	4.24	54.4	3.96	1.2	0.98	0.6	1.58	0.6
2	53	4	1	2	0	0	0	115	75	95	26.74	81	0	0	4.74	37.5	2.3	1.2	0.98	0.87	0.9	0.33
2	53	4	1	2	1	0	0	145	95	90	27.27	83	0	0	4.37	47.4	3	1.2	0.98	1.1	0.9	0.1
1	76	6	2	2	0	0	0	111	75	90	34.67	88	0	0	4.57	94.8	6.78	1.2	0.98	0.88	0.9	0.32
1	62	5	1	2	1	0	0	115	85	85	23.44	78	0	0	4.65	71	8.44	1.2	0.98	0.89	0.7	0.31
1	55	4	1	2	0	0	0	95	65	70	20.31	82	0	0	4.83	66	4.4	1.2	0.98	0.88	0.9	0.32
2	75	6	1	2	0	0	0	110	60	75	19.82	83	0	0	4.15	65	5.04	1.2	0.98	0.78	0.88	0.42
2	74	6	1	2	0	0	0	95	65	69	19.74	80	0	0	4.24	14.6	5.2	1.2	1	0.8	0.98	0.4
1	63	5	1	2	0	0	0	105	75	94	24.84	67	0	0	4.25	46.5	3.9	1.2	1	0.54	0.98	0.66
2	70	6	2	2	1	0	0	145	95	78	21.87	80	0	0	4.25	41.6	4.2	1.2	1	0.87	0.99	0.33
1	58	4	2	2	0	0	0	115	70	98	23.11	77	0	0	4.2	41.5	4.2	1.2	1	0.8	0.98	0.4
1	70	6	1	2	1	0	0	125	85	87	20.2	59	0	0	4.49	54.5	3.62	1.2	1.3	1.1	1.2	0.1
1	48	3	1	2	0	0	0	125	80	100	27.05	80	0	0	4.36	46	2.9	1.2	1.3	0.97	1.1	0.23
1	69	5	1	2	0	0	0	115	75	92	35.06	90	0	0	5.43	92	8.46	1.2	1.3	0.95	1.3	0.25
2	51	4	1	2	0	0	0	115	70	88	27.53	67	0	0	4.1	15.1	4.6	1.2	1.3	1.1	0.9	0.1
1	75	6	1	3	0	0	0	120	65	98	27.18	80	0	0	4.3	15.6	5.2	1.2	1.3	0.96	1.2	0.24
2	71	6	2	2	1	0	0	120	65	82	23.93	80	0	0	4.1	15.2	4.9	1.2	1.3	0.96	1.2	0.24
2	52	4	2	2	0	0	0	95	60	80	23.19	60	0	0	4.2	16.8	5.2	1.2	1.6	0.9	1.6	0.3
1	55	4	1	2	0	0	0	125	75	78	20.81	61	0	0	4.79	64	4.81	1.2	1.6	0.9	1.5	0.3
1	53	4	1	2	0	0	0	105	65	96	30.8	65	1	0	4.75	50	3.28	1.2	2.4	1	1.6	0.2
1	71	6	1	2	0	0	0	120	75	93	24.75	74	0	0	5.52	88	7.24	1.2	3.2	0.87	0.99	0.33
2	73	6	1	2	1	0	0	115	80	83	33.33	92	0	0	4.56	49.4	3.86	1.2	3.6	0.9	0.9	0.3
1	60	5	1	2	0	0	0	110	65	78	24.67	70	0	0	4.27	77	4.67	1.23	0.87	1.13	2.56	0.1
2	71	6	2	2	1	0	0	140	75	93	25.92	82	0	0	4.32	41.3	3.88	1.23	1.53	0.88	2.97	0.35
2	64	5	1	2	1	0	0	120	75	122	34.05	80	0	0	4.26	58.1	3.97	1.23	1.75	1.12	2.42	0.11
1	55	4	1	2	1	0	0	105	85	90	24.28	80	0	0	5.98	57.2	5.25	1.24	0.83	0.82	2.21	0.42
2	36	2	2	2	0	0	0	105	65	70	20.78	73	0	0	4.56	55	5.3	1.25	1.32	1.23	1.1	0.02
2	53	4	1	2	1	0	0	115	85	96	31.62	82	0	0	4.57	51.6	3.73	1.26	0.89	0.81	0.55	0.45
2	50	4	1	2	0	0	0	125	80	110	34.21	99	0	0	7.31	43.3	3.99	1.3	0.9	0.9	1.2	0.4
1	50	4	1	2	0	0	0	100	65	93	25	76	1	0	5.2	41.5	5.3	1.3	0.92	1.1	1.2	0.2
2	59	4	1	2	1	0	0	125	65	89	35.13	88	0	0	5	56.7	3.93	1.3	0.92	1.1	1.2	0.2
1	55	4	1	2	1	0	1	115	80	103	28.93	70	0	0	9.24	78	4.51	1.3	0.95	0.96	1.2	0.34
1	67	5	1	3	0	0	0	115	75	90	23.05	79	0	0	5	93	5.77	1.3	0.95	0.96	1.2	0.34
1	64	5	1	2	1	0	0	145	85	80	20.83	60	0	0	4.5	45.5	3.65	1.3	0.95	0.95	1.2	0.35
1	54	4	2	2	0	0	0	100	65	86	23.15	80	0	0	4.36	41.6	3.96	1.3	0.96	0.92	1.2	0.38
1	60	5	2	2	1	0	0	125	85	98	30.09	76	0	0	4.93	94	4.93	1.3	0.96	0.95	1.1	0.35
2	72	6	3	3	1	0	0	135	95	80	28.76	78	0	0	4.69	41.5	2.9	1.3	0.98	1	0.88	0.3
1	56	4	1	2	1	0	0	125	75	107	32.21	78	1	0	4.71	67.6	3.73	1.3	1	0.98	1.1	0.32
1	64	5	1	3	0	0	0	105	65	90	26.4	74	0	0	6.57	15.6	6.2	1.3	1	0.98	1.2	0.32
1	56	4	2	2	0	0	0	110	65	105	31.57	83	1	1	4.12	56	3.06	1.3	1.01	0.96	1.3	0.34
2	54	4	1	2	0	0	0	105	65	84	24.65	88	0	0	4.65	64.1	2.76	1.3	1.1	0.95	1.2	0.35
2	55	4	1	2	1	0	0	115	70	86	25.92	81	0	0	4.1	15.5	6.2	1.3	1.1	1.1	1.2	0.2
1	54	4	2	2	0	0	0	105	65	101	28.93	76	0	1	5.29	66.3	5.19	1.3	1.1	0.96	1.2	0.34
1	76	6	1	2	1	0	0	125	85	93	21.77	84	0	0	4.54	53.6	4.68	1.3	1.1	1.1	1.2	0.2
1	71	6	2	3	0	0	0	105	65	85	23.24	73	0	0	4.92	91	5.4	1.3	1.1	1.2	1.4	0.1
1	52	4	1	2	0	0	0	105	75	94	26.64	72	0	0	4.23	24.5	4.2	1.3	1.1	0.8	0.98	0.5
1	54	4	1	2	0	0	0	115	80	98	29	77	0	0	4.7	93	4.93	1.3	1.1	1.2	1.2	0.1
1	49	3	1	2	1	0	0	105	70	96	29.02	80	0	0	12.29	75	3.92	1.3	1.1	1.2	1.2	0.1
2	73	6	2	2	1	0	0	155	90	80	20.78	92	0	0	4.1	15.3	5.1	1.3	1.1	1.2	1.2	0.1
2	63	5	1	2	1	0	0	140	70	103	30.8	76	0	0	4.4	44.4	6.7	1.3	1.1	0.96	0.94	0.34
1	53	4	1	3	0	0	0	125	70	78	21.13	53	0	0	4.84	44.8	3.67	1.3	1.2	1.2	0.96	0.1
1	63	5	1	2	0	0	0	105	65	76	21.48	82	0	0	4.36	65.7	3.38	1.3	1.2	0.89	1.3	0.41
2	51	4	1	2	0	0	0	95	65	78	28.31	83	0	0	4	38.7	2.54	1.3	1.2	0.9	1.3	0.4
1	49	3	1	2	1	0	0	140	75	95	24.34	82	1	0	4.54	61.9	5.37	1.3	1.2	1.2	0.95	0.1
1	48	3	1	2	0	1	0	100	65	86	25.44	80	0	0	4.5	24.6	5.6	1.3	1.2	1.2	0.98	0.1
2	48	3	1	2	1	0	1	125	65	90	29.52	94	0	0	11.94	35.8	2.63	1.3	1.2	1.2	0.96	0.1
1	56	4	1	2	0	0	0	105	70	91	26.4	89	0	0	4.7	78	4.41	1.3	1.2	0.95	1.1	0.35
1	66	5	1	2	0	0	0	115	75	84	22.1	76	0	0	4.01	55.7	6.84	1.3	1.2	1.2	0.96	0.1
2	57	4	1	2	1	0	0	130	80	113	31.93	94	0	0	4.1	38.5	3.19	1.3	1.2	1.2	0.96	0.1
2	52	4	1	2	1	0	0	135	80	94	26.67	82	0	0	10.67	70	7.02	1.3	1.2	1.2	0.93	0.1
1	50	4	2	2	0	0	0	115	75	95	28.08	79	0	0	4.74	71.2	5.1	1.3	1.2	0.93	1	0.37
2	48	3	1	2	0	0	0	115	75	95	26.9	86	0	0	4.88	45.9	2.84	1.3	1.2	0.95	0.96	0.35
1	61	5	2	2	0	0	0	115	75	110	33.13	92	0	0	4.3	15.6	5.2	1.3	1.2	1.2	0.96	0.1
2	76	6	1	2	1	0	0	125	75	78	25.56	80	0	0	4.29	65	4.51	1.3	1.2	0.93	1.3	0.37
2	61	5	1	2	0	0	0	110	65	72	24.17	80	0	0	4.48	60	6.1	1.3	1.2	1.2	0.96	0.1
2	51	4	1	2	1	0	0	135	85	100	36.79	66	0	0	7.15	48.7	3.86	1.3	1.3	0.1	0.3	1.2
1	69	5	2	2	1	0	0	155	90	91	32.02	78	0	0	6.49	54.2	7.7	1.3	1.3	0.95	1.2	0.35
1	63	5	1	2	0	0	0	125	75	97	24.38	61	0	0	6.03	96	6	1.3	1.65	0.98	1.87	0.32
1	71	6	1	2	1	0	1	140	75	105	29.65	80	0	0	14.77	100	5.55	1.32	1.56	0.84	2.84	0.48
2	58	4	1	2	1	0	0	145	95	100	31.64	81	0	0	4.75	22.2	4.64	1.35	0.34	0.52	0.2	0.83
1	50	4	2	2	0	0	0	105	75	85	31.25	90	0	0	6.02	45.6	5.36	1.35	0.98	1.28	0.9	0.07
1	60	5	1	3	1	0	0	120	80	96	30.46	85	0	0	6.2	59.1	3.8	1.36	0.34	0.9	0.8	0.46
1	48	3	1	2	0	0	0	115	75	90	26.7	70	0	0	4.88	102	6.3	1.36	1.29	1.14	0.95	0.22
2	66	5	1	2	1	0	0	140	95	108	25.65	77	0	0	4.06	65	3.59	1.38	0.5	0.52	0.23	0.86
1	87	6	3	2	0	0	0	120	75	96	25.77	88	0	0	4.68	58.1	4.67	1.39	1.56	0.58	0.61	0.81
1	66	5	2	2	0	0	0	105	75	77	20.83	64	0	0	4.57	18.2	3.27	1.4	0.79	0.77	0.89	0.63
1	59	4	1	2	1	0	0	125	85	85	24.01	79	0	0	7.76	63.6	7.63	1.4	0.98	0.9	0.88	0.5
1	51	4	1	2	0	0	0	95	60	80	22.5	65	1	0	4.78	47	3.15	1.4	1.2	0.93	1.3	0.47
1	69	5	2	3	0	0	0	105	75	70	23.01	61	0	0	4.31	95	7.81	1.4	1.2	1.3	0.89	0.1
2	46	3	2	2	1	0	0	135	85	98	28.35	70	0	0	5.07	58	3.71	1.42	0.97	0.94	2.56	0.48
1	79	6	1	2	1	0	0	145	85	88	22.58	87	0	0	4.78	85	6.51	1.45	1.56	0.89	1.85	0.56
1	55	4	1	2	1	0	0	130	80	114	39.45	80	0	0	4.46	21	5.4	1.5	0.1	1	0.1	0.5
1	54	4	1	2	0	0	0	115	65	94	24.46	60	1	0	5.26	41.5	4.2	1.5	0.65	0.65	0.7	0.85
1	66	5	1	2	1	0	0	105	55	102	27.61	76	0	0	4.37	45.7	7.49	1.5	0.68	0.88	0.99	0.62
1	57	4	1	2	1	0	0	125	75	100	29.34	77	1	0	4.85	57.9	5.16	1.5	0.7	0.88	0.7	0.62
1	58	4	1	2	0	0	0	95	65	82	22.21	71	0	0	5.23	41.5	2.9	1.5	0.9	0.88	1.3	0.62
1	60	5	1	2	1	0	0	125	85	113	35.26	101	0	0	7.17	53.6	3.12	1.5	0.98	1.2	0.88	0.3
1	51	4	1	2	0	0	0	105	65	90	26.29	80	0	0	4.62	89	7.53	1.5	1.1	1.2	0.9	0.3
1	48	3	2	2	1	0	0	115	65	108	33.39	80	1	0	4.44	41.5	2.98	1.5	1.13	1.2	1.5	0.3
2	59	4	1	2	1	0	0	140	85	106	33.33	85	0	0	4.36	10	5.31	1.5	1.2	1	0.04	0.5
1	72	6	1	2	1	0	0	145	85	97	28.01	76	0	0	4.65	41.32	4.2	1.5	1.2	0.76	0.88	0.74
2	57	4	1	2	1	0	0	155	90	81	24.44	100	0	0	3.91	51.4	3.57	1.5	1.2	0.5	0.2	1
1	56	4	1	2	1	0	0	115	85	104	33.33	80	0	0	3.96	64	4.63	1.5	1.2	0.88	0.98	0.62
2	50	4	1	2	0	0	0	115	70	93	25.3	66	0	0	4.35	10	4.19	1.5	1.5	0.49	0.1	1.01
1	70	6	1	2	1	0	0	130	70	99	28.67	80	0	0	4.2	54.2	4.1	1.5	1.6	0.77	0.98	0.73
2	54	4	2	2	0	0	0	115	75	104	24.38	80	0	0	4.2	41.6	2.69	1.5	2	0.77	0.9	0.73
2	57	4	1	2	1	0	0	115	75	95	26.67	75	0	0	5.1	21.6	4.2	1.5	2.6	0.94	0.98	0.56
1	49	3	1	2	1	0	0	115	85	125	39.18	89	0	0	4.64	84.5	2.95	1.5	2.6	0.9	0.98	0.6
2	56	4	2	2	1	0	0	125	85	83	22.72	66	0	0	4.49	38.8	3.15	1.5	5.2	0.98	0.99	0.52
1	79	6	1	2	1	0	0	135	85	76	27.3	76	0	0	4.5	64	6.06	1.52	2.53	0.95	0.87	0.57
1	54	4	2	2	1	0	0	115	75	93	23.05	82	1	0	5.06	51.4	4.9	1.54	1.23	1.25	1.1	0.29
2	50	4	1	2	1	0	0	145	90	100	31.64	97	0	0	4.15	40.3	4.24	1.55	0.86	1.07	2.63	0.48
1	61	5	1	2	0	0	0	115	75	105	28.65	83	0	0	3.99	62.7	6.02	1.56	1.2	1.48	1.25	0.08
2	54	4	1	2	1	0	0	145	85	100	38.67	79	0	0	4.1	15.3	4.8	1.58	1.25	0.8	1.3	0.78
1	48	3	1	2	1	0	0	115	80	90	26.64	70	1	0	4.2	54.3	4.65	1.59	1.1	0.88	0.68	0.71
1	49	3	1	2	0	0	0	115	75	98	22.46	79	0	0	5.2	14.5	3.99	1.6	0.5	1.4	1.1	0.2
2	58	4	1	2	0	0	0	120	75	105	34.6	84	0	0	4.09	49.7	5.88	1.6	0.98	0.95	0.98	0.65
2	52	4	1	2	1	0	0	115	75	86	25.67	76	0	0	4.9	24.6	4.69	1.6	1	0.87	0.9	0.73
1	67	5	1	2	0	0	0	110	70	99	23.31	91	0	0	4.23	21.5	3.3	1.6	1.2	0.48	0.98	1.12
1	63	5	2	2	1	0	0	125	90	85	23.23	68	0	0	4.2	34.5	4.2	1.6	1.3	0.95	0.8	0.65
2	49	3	2	2	1	0	0	115	85	110	29.55	71	0	0	4.87	44.7	2.91	1.6	1.4	1.3	1.1	0.3
1	71	6	1	2	0	0	0	115	75	73	25.81	64	0	0	5.2	45.2	3.2	1.6	1.8	0.8	0.9	0.8
1	50	4	1	2	0	0	0	95	65	98	27.08	75	1	0	4.25	41.6	5.01	1.6	2	0.88	0.9	0.72
1	55	4	2	2	0	0	0	130	75	105	31.6	80	0	0	4.32	41.52	6.8	1.6	2.63	0.6	1.8	1
1	54	4	2	2	0	0	0	125	75	98	26.22	80	0	0	5.22	42.5	3.5	1.6	3.2	0.98	0.88	0.62
2	49	3	1	2	0	0	0	115	70	75	20.28	71	0	0	4.22	14.6	4.2	1.65	0.8	0.87	0.99	0.78
1	47	3	2	2	1	0	0	115	85	104	32.46	80	0	0	4.4	64.4	3.51	1.65	0.8	0.77	0.98	0.88
1	55	4	2	2	1	0	0	125	85	113	35.79	101	0	0	4.18	75.2	3.41	1.65	0.99	0.79	0.8	0.86
2	69	5	1	2	0	0	0	105	65	107	27.24	80	0	0	4.2	15.3	4.6	1.65	1.23	1.2	1.1	0.45
2	68	5	2	2	1	0	0	85	145	94	25.71	82	0	0	4.53	41.5	5.3	1.65	1.23	1.45	0.96	0.2
1	53	4	3	2	0	0	0	115	75	92	29.07	81	0	0	4.2	15.6	5.2	1.65	1.24	1.21	1.23	0.44
2	35	2	3	2	0	0	0	95	65	83	25.97	76	0	0	4.14	59	5.3	1.65	1.45	1.45	0.96	0.2
1	74	6	1	2	1	0	0	135	90	94	22.58	80	0	0	4.5	79	7.69	1.65	1.45	1.25	0.96	0.4
1	75	6	2	3	1	0	0	125	85	77	19.56	69	0	0	5.47	40	4.32	1.65	1.5	0.98	1.1	0.67
1	55	4	1	2	0	0	0	105	75	84	22.13	70	0	0	5.74	89	5.53	1.68	0.7	0.88	0.96	0.8
2	67	5	2	3	0	0	0	125	70	102	26.4	80	0	0	5.96	43.5	5.38	1.68	0.78	1.1	0.99	0.58
2	61	5	1	2	1	0	0	140	80	91	30.82	100	0	0	14.91	73	6.81	1.68	0.88	0.9	1.1	0.78
1	49	3	1	2	1	0	0	120	80	83	39.01	83	0	0	5.2	41.6	3.5	1.68	0.9	0.98	0.88	0.7
1	87	6	1	3	1	1	1	125	75	106	29.38	100	0	0	4.5	41.2	5.2	1.68	1.01	0.85	0.98	0.83
1	61	5	1	2	1	0	0	145	95	96	26.84	74	0	0	4.03	63	5.45	1.68	1.1	0.88	0.98	0.8
1	52	4	2	2	1	0	0	130	80	75	19.61	90	1	1	4.05	46.9	3.06	1.68	1.1	0.9	0.87	0.78
1	61	5	1	2	1	0	0	125	85	100	24.16	86	0	0	4.93	84	4.61	1.69	0.7	0.88	0.97	0.81
1	82	6	1	2	0	0	0	125	75	82	26.95	80	0	0	4.1	14.5	5.3	1.69	0.7	1	1.1	0.69
2	69	5	1	2	1	0	0	130	75	80	26.38	74	0	0	4.21	45.6	4.2	1.69	0.77	0.8	0.9	0.89
2	79	6	1	3	0	0	0	120	65	80	20.64	110	0	0	4.61	67	3.96	1.69	2	0.88	0.9	0.81
2	60	5	3	2	0	0	0	120	80	108	57.85	92	0	0	4.36	45.2	6.14	1.7	2	0.9	1.1	0.8
1	61	5	1	2	0	0	0	115	80	105	28.38	92	0	0	4.78	74.6	5.47	1.74	1.23	0.98	2.95	0.76
2	51	4	2	2	1	0	0	140	95	112	36.74	96	0	0	5.18	70	5.2	1.75	0.86	0.98	2.46	0.77
1	54	4	1	2	0	0	0	115	80	95	27.1	80	0	0	3.98	134	8.77	1.78	1.98	1.12	2.53	0.66
1	80	6	1	3	0	0	0	115	75	85	24.22	88	0	0	4.86	90.5	9.65	1.8	0.45	0.85	0.96	0.95
1	56	4	1	2	0	0	0	105	65	111	36.16	57	0	0	5.75	57	7.68	1.8	0.68	1.01	0.59	0.79
1	48	3	1	2	1	0	0	115	75	89	27.92	95	0	0	5.36	52.6	3.88	1.8	1.2	1.1	1.92	0.7
1	53	4	1	2	0	0	0	105	70	92	23.45	67	1	0	4.39	54.4	4.76	1.8	1.2	0.93	0.9	0.87
2	51	4	1	2	0	0	0	115	80	88	27.18	75	0	0	4.22	31.6	4.2	1.8	1.6	1.1	1	0.7
2	50	4	1	3	1	0	0	130	75	73	24.97	74	0	0	4.56	41.6	5.6	1.8	1.9	1.4	1.5	0.4
2	49	3	2	2	0	0	0	115	65	90	29.62	96	0	0	3.96	50.6	5.65	1.8	2	0.2	0.5	1.6
1	50	4	1	2	0	0	0	105	65	82	22.2	104	0	0	5.54	57	5.87	1.81	0.73	0.75	1.09	1.06
1	53	4	1	3	1	0	0	125	85	84	24.68	76	0	0	4.22	40.4	3.91	1.82	0.23	1.05	0.74	0.77
2	53	4	1	2	0	0	0	120	65	82	24.35	80	0	0	4.99	26.7	5.32	1.83	0.51	1.6	1.6	0.23
1	49	3	1	2	0	0	0	100	65	71	22.84	55	1	0	4.44	91	4.89	1.85	0.78	1.64	2.89	0.21
2	51	4	2	2	0	0	0	125	75	99	31.6	78	0	0	4.24	48.5	2.81	1.85	1.36	0.99	1.55	0.86
1	67	5	1	2	0	0	0	120	60	95	26.12	71	0	0	3.97	53.4	2.93	1.85	4.56	0.85	1.14	1
2	60	5	1	2	0	0	0	95	60	88	23.68	71	0	0	4.92	56.6	3.49	1.86	0.97	0.93	0.29	0.93
2	23	1	2	1	0	0	0	95	60	69	22.48	82	0	0	4.29	39.6	3.6	1.89	0.73	0.73	1.12	1.16
1	42	3	2	2	0	0	0	115	75	80	21.22	78	0	0	4.23	57.8	4.28	1.89	0.95	0.81	1.33	1.08
2	51	4	1	2	0	0	0	95	60	86	21.52	92	0	0	6.22	54.6	6.43	1.89	1.27	0.79	1.03	1.1
1	63	5	1	2	0	0	0	115	75	92	23.11	87	0	0	5.06	49.8	4.8	1.9	0.1	1.2	1.4	0.7
1	58	4	1	2	1	1	0	125	75	111	34.31	89	0	0	4.84	60.1	4.05	1.9	0.89	0.87	1.09	1.03
2	53	4	2	2	1	0	0	115	75	93	27.39	78	0	0	5.93	38.4	3.56	1.9	1.1	0.98	1	0.92
2	71	6	1	2	1	0	0	160	100	120	41.4	95	0	0	4.53	40.1	4.74	1.9	1.2	0.9	3	1
2	71	6	1	2	1	0	0	115	80	78	22.37	98	0	0	5.36	40	5.1	1.9	2	0.9	1.1	1
2	50	4	2	2	1	0	0	140	85	111	38.52	100	0	0	7.23	55.2	4.85	1.91	2.22	0.82	0.79	1.09
2	63	5	1	2	1	0	0	135	95	97	25.63	88	0	0	4.77	50.1	6.1	1.92	0.89	0.87	1.06	1.05
2	20	1	2	1	0	0	0	90	60	71	19.53	84	0	0	4.3	48.6	3.91	1.93	0.25	0.88	1.31	1.05
1	54	4	1	2	1	0	0	155	85	97	24.61	95	0	0	5.55	28.4	3.65	1.93	0.42	0.64	0.58	1.29
1	50	4	1	3	0	0	0	110	65	67	27.03	70	1	0	4.16	57.3	3.31	1.94	0.5	0.99	0.99	0.95
1	22	1	2	1	1	0	0	135	65	71	22.41	75	0	0	4.68	50.9	3.59	1.95	0.74	0.82	1.28	1.13
1	50	4	1	2	1	0	0	125	85	95	23.88	72	0	0	4.01	63.8	4.26	1.96	1.2	1.3	0.93	0.66
1	20	1	2	1	0	0	0	115	75	82	24.3	84	0	0	4.39	50.6	3.37	1.97	0.52	0.86	1.27	1.11
1	50	4	1	2	0	0	0	125	75	92	25.61	84	0	0	3.92	58	6.83	1.97	0.77	0.83	1.44	1.14
1	63	5	1	2	0	0	0	115	75	97	27.92	71	0	0	5.46	85	4.98	1.98	0.88	0.98	0.78	1
2	50	4	1	2	1	0	0	145	100	113	33.32	108	0	0	5.23	41.5	5.2	1.98	0.99	1	1.1	0.98
2	52	4	1	2	1	0	0	140	70	78	23.74	89	0	0	5.22	41.9	5.2	1.99	0.59	1	0.79	0.99
1	62	5	1	2	0	0	0	110	75	74	22.76	99	0	0	4.67	92	5.59	2	0.98	0.97	0.88	1.03
2	58	4	1	2	1	0	0	125	85	80	21.1	89	0	0	4.35	20	8.14	2	1	0.49	0.05	1.51
2	60	5	2	2	1	0	0	135	85	104	37.57	80	0	0	4.37	10	4.23	2	1.02	0.49	0.03	1.51
1	51	4	1	2	0	0	0	115	75	89	25.39	65	0	0	5.2	45.2	4.2	2	1.23	0.9	0.69	1.1
1	54	4	1	2	0	0	0	115	75	86	23.62	76	0	0	4.11	57	4.24	2	1.3	1.3	1.6	0.7
2	62	5	1	2	0	0	0	95	65	66	21.33	80	0	0	5.23	38.3	3.4	2	1.9	0.89	3.2	1.11
2	46	3	1	2	1	0	0	130	85	89	27.69	74	0	0	5.16	45.3	4.18	2.01	0.8	1.06	3.18	0.95
1	63	5	1	2	1	0	0	115	75	85	23.23	78	0	0	4.83	50.2	4.71	2.01	1.19	0.92	1.23	1.09
2	50	4	1	2	1	0	0	115	85	79	23.19	74	0	0	5.29	50.6	5.6	2.03	0.59	1.1	0.87	0.93
1	76	6	1	2	0	0	0	100	65	83	21.5	64	0	0	4.37	56.9	5.89	2.03	0.71	0.92	1.29	1.11
1	55	4	1	3	0	0	0	85	55	83	20.44	74	0	0	4.89	52.6	4.63	2.05	0.71	0.91	1.3	1.14
1	74	6	1	2	1	0	0	130	75	80	22.31	82	0	0	3.98	41.4	2.97	2.05	0.97	0.92	1.53	1.13
2	50	4	1	2	0	0	0	105	65	77	25.57	84	0	0	2.95	55.9	4.72	2.07	0.64	0.89	1.18	1.18
1	66	5	1	2	1	0	0	125	85	76	19.78	74	0	0	6.67	41	6.72	2.07	0.78	1.1	0.7	0.97
1	60	5	1	2	0	0	0	105	65	116	27.78	76	0	0	4.14	57	5.81	2.07	1.2	0.85	1.37	1.22
1	76	6	1	2	1	0	0	130	75	90	22.06	71	0	0	4.06	64	4.38	1.98	0.21	0.55	0.37	1.43
2	55	4	1	2	1	0	0	115	70	95	28.44	77	0	0	5.45	43.7	3.76	2.08	0.97	0.84	1.32	1.24
2	52	4	2	2	1	0	0	115	85	96	29.52	89	0	0	4.61	55.3	3.37	2.08	1.11	0.97	1.03	1.11
1	53	4	1	2	0	0	0	115	75	115	34.6	68	1	0	3.64	12.5	4.35	2.09	0.13	0.49	2.03	1.6
2	67	5	1	2	1	0	0	120	75	92	27.59	80	0	0	4.31	36.5	4	1.65	0.2	0.3	0.6	1.35
2	47	3	1	2	0	0	0	95	60	95	29.75	84	0	0	4.2	15.6	5.4	2.1	0.9	1.1	1.3	1
2	73	6	1	3	1	0	0	140	80	74	23.12	76	0	0	4.1	15.3	4.9	2.1	0.9	1.3	1.2	0.8
1	58	4	1	2	0	0	0	105	65	86	21.77	77	0	0	5.45	78	5.49	2.1	0.98	1.3	1.2	0.8
2	49	3	2	2	0	0	0	115	75	85	21.91	75	0	0	5.2	25.6	4.1	2.1	1	0.9	1	1.2
2	51	4	1	2	0	0	0	95	60	86	20.89	100	0	0	4.24	56.1	2.77	2.1	1.1	1.1	3.1	1
1	52	4	2	2	0	0	0	115	77.5	115	28.33	82	0	0	5.2	51.2	4.2	2.1	1.2	1.8	0.9	0.3
1	57	4	1	2	0	0	0	120	65	75	25.06	64	0	0	5.91	103	5.73	2.1	1.3	1.84	1.01	0.26
1	57	4	1	2	0	0	0	115	75	95	24.44	73	0	0	5.37	53.2	3.46	2.1	1.36	0.79	1.32	1.31
1	48	3	2	2	1	0	0	130	75	91	27.59	80	0	0	5.66	53.1	6.36	2.1	1.42	0.82	1.46	1.28
1	55	4	1	2	0	0	0	105	65	98	23.94	79	0	0	4.79	55	4.56	2.1	1.9	1.9	1.5	0.2
2	69	5	2	2	1	0	0	145	95	118	34.02	72	0	0	4.74	42.8	3.53	2.11	0.7	0.99	1.22	1.12
1	54	4	1	2	0	0	0	105	60	80	24.16	68	0	0	5.49	68.1	5.69	2.11	0.74	0.86	1.53	1.25
1	57	4	1	2	1	0	0	135	85	105	26.61	67	0	0	4.11	56.5	6.46	2.12	0.99	0.89	1.39	1.23
2	63	5	1	2	0	0	0	105	65	69	17.29	91	0	0	4.69	47.5	4.66	2.12	1.81	0.85	1.28	1.27
2	54	4	1	2	0	0	0	105	65	86	18.97	88	0	0	4.77	53.3	5.18	2.13	0.67	0.8	1.33	1.33
2	63	5	1	2	1	0	0	125	65	85	23.37	90	0	0	5.6	61	45	2.13	1.2	1.5	1.8	0.63
1	57	4	1	2	0	0	0	115	65	92	23.53	75	0	0	4.15	46.2	3.03	2.13	1.29	0.91	1.45	1.22
1	52	4	1	2	0	0	0	110	65	92	25.59	64	1	1	4.31	55.1	5.17	2.14	0.5	0.97	1.35	1.17
2	48	3	1	2	0	0	0	95	60	86	24.03	84	0	0	4.55	36.2	4.53	2.14	0.54	0.87	1.55	1.27
2	54	4	1	2	1	1	0	95	65	80	22.35	87	0	0	4.5	43.5	4.32	2.14	0.56	1.07	0.97	1.07
1	22	1	1	1	0	0	0	95	65	80	26.83	66	0	0	4.75	63.8	4.2	2.15	0.33	0.93	1.23	1.22
2	56	4	1	2	0	0	0	105	65	95	24.03	70	0	0	4.37	43.8	3.69	2.15	1.01	0.84	0.9	1.31
1	71	6	1	2	0	0	0	105	65	88	24.34	75	0	0	3.96	52.3	6.98	2.16	0.52	0.87	1.71	1.29
1	71	6	1	2	1	0	0	125	80	80	20.52	76	0	0	4.66	54.4	8.05	2.17	0.44	0.93	1.38	1.24
2	60	5	1	2	1	0	0	132.5	85	90	27.63	72	0	0	4.5	56.8	4.2	2.17	0.55	0.94	1.37	1.23
2	47	3	1	2	0	0	0	105	65	78	20.83	80	0	0	4.09	31.7	3.95	2.17	0.65	0.87	0.87	1.3
1	56	4	1	2	1	0	0	115	85	78	19.68	80	0	0	4.74	43.5	4.38	2.18	0.66	0.73	1.75	1.45
1	53	4	1	2	0	0	0	115	80	89	36.93	86	1	0	4.37	51.3	3.89	2.18	0.68	0.85	1.57	1.33
1	53	4	1	2	0	0	0	95	60	104	28.96	87	0	0	4	53.2	6.9	2.18	0.86	0.8	1.42	1.38
1	50	4	1	2	0	0	0	115	70	109	29.26	78	1	1	4.66	70.9	2.7	2.19	1.22	0.78	1.8	1.41
2	47	3	1	2	0	0	0	105	65	96	29.33	68	0	0	5.38	50.2	4.91	2.2	0.3	1.8	1.5	0.4
1	47	3	1	2	0	0	0	115	75	104	30.86	75	0	0	3.9	74	6.1	2.2	0.3	1.8	1.5	0.4
1	70	6	1	2	1	0	0	125	85	88	22.32	76	0	0	5.52	73	6.66	2.2	0.3	1.8	1.5	0.4
2	56	4	1	3	1	0	0	125	75	70	25.85	73	0	0	5.22	41.52	5	2.2	0.3	1.8	1.5	0.4
2	47	3	1	2	1	0	0	145	95	87	25.11	77	0	0	4.53	76	4.51	2.2	0.5	1.7	1.6	0.5
1	75	6	1	2	0	0	0	125	75	115	29.06	68	0	0	4.44	64.2	5.12	2.2	0.69	1.25	0.58	0.95
2	52	4	1	3	0	1	0	115	75	101	24.56	68	0	0	4.52	45.2	3.63	2.2	0.8	1.3	1.2	0.9
1	65	5	1	2	1	0	0	120	85	94	23.81	86	0	0	5.83	72	6.3	2.2	0.9	1.2	1.1	1
1	63	5	2	2	1	0	0	120	80	88	21.88	88	0	0	4.2	52	5.3	2.2	0.9	1.3	1.1	0.9
1	67	5	1	2	1	0	0	140	80	91	25.24	80	0	0	5.25	41.6	5.2	2.2	0.96	1.2	1.3	1
1	52	4	1	2	0	0	0	105	70	84	25	80	0	0	14.5	35.2	4.1	2.2	0.96	1.3	1.2	0.9
1	50	4	1	2	1	0	0	140	85	100	29.76	62	0	0	4.3	41.5	2.8	2.2	0.96	1.2	0.87	1
1	60	5	1	2	1	0	0	125	95	102	26.22	89	0	0	4.1	56.5	3.4	2.2	0.97	0.77	1.76	1.43
1	58	4	1	2	0	0	0	110	70	96	27.04	74	0	0	4.83	85	6.18	2.2	0.98	1.5	0.9	0.7
2	48	3	1	2	1	0	0	145	95	96	30.47	96	0	0	10.25	83	6.73	2.2	0.98	1.2	0.9	1
1	63	5	1	2	1	0	0	150	85	74	21.76	80	0	0	4.32	54.5	4.44	2.2	0.98	1.3	0.88	0.9
1	73	6	1	2	0	0	0	100	65	85	22.68	83	0	0	4.65	41.6	4.6	2.2	0.98	1.23	0.9	0.97
2	46	3	1	2	0	0	0	95	65	82	24.03	81	0	0	4.43	43.9	3.51	2.2	0.98	1.3	0.7	0.9
1	49	3	2	2	0	0	0	105	65	82	21.11	59	1	0	5.05	95	5.97	2.2	0.98	1.2	0.99	1
1	59	4	2	2	0	0	0	115	75	109	32.86	83	0	0	4.4	59.4	5.95	2.2	1.1	1.4	1.3	0.8
1	59	4	2	2	0	0	0	115	65	94	23.88	86	0	0	4.66	49.2	7.07	2.2	1.1	1.2	0.94	1
1	55	4	1	2	0	0	0	125	75	80	22.98	81	0	0	4.48	58.2	4.02	2.2	1.1	1.2	0.95	1
1	47	3	1	2	1	0	0	105	65	84	22.76	59	1	0	5.55	83	5.75	2.2	1.3	1.3	0.9	0.9
1	52	4	2	2	0	0	0	115	65	83	22.66	57	0	0	4.58	90	7.55	2.2	1.3	1.2	0.95	1
1	59	4	1	2	0	0	0	95	60	105	28.71	64	0	0	4	50.9	2.77	2.2	1.3	1.2	0.93	1
1	70	6	2	2	0	1	0	95	65	95	25.15	77	0	0	5.33	110	6.12	2.2	1.3	1.2	0.96	1
1	63	5	1	2	1	0	0	125	80	91	25.39	80	0	0	4.42	68.1	5.68	2.2	1.3	1.3	0.98	0.9
1	69	5	1	2	0	0	0	115	75	85	21.83	81	0	0	4.77	63.6	6.36	2.2	1.3	0.6	1.3	1.6
1	72	6	1	2	1	0	0	145	105	80	20.2	62	0	0	5.3	36.2	5.6	2.2	1.3	1.2	0.96	1
2	58	4	1	2	1	0	0	115	85	88	22.94	86	0	0	5.86	40.8	5.62	2.2	1.66	0.86	1.36	1.34
1	50	4	2	2	0	0	0	115	75	82	25.63	80	0	0	4.36	70	6.34	2.2	1.95	0.75	1.45	1.45
2	49	3	1	2	1	0	0	135	80	106	29.15	73	0	0	4.18	46.9	4.8	2.2	3.4	2.1	5.6	0.1
2	22	1	2	1	0	0	0	105	75	73	22.03	100	0	0	4.01	48.4	3.44	2.21	0.3	0.86	1.47	1.35
2	52	4	1	2	0	0	0	105	65	94	28.52	80	0	0	4.73	52	2.9	2.21	0.31	0.84	1.62	1.37
2	69	5	1	2	1	1	1	125	65	93	22.55	77	0	0	7.74	65.7	5.64	2.21	1.48	0.88	1.28	1.33
1	57	4	1	2	1	0	0	135	90	109	29.02	91	0	0	4.82	53.9	4.3	2.22	0.72	0.82	1.68	1.4
1	61	5	1	2	1	0	0	125	85	108	31.83	82	0	0	22.37	59.8	4.91	2.22	1.14	0.85	1.48	1.37
1	63	5	1	2	1	0	0	125	90	98	26.57	71	0	0	5.08	55.2	6.29	2.22	1.22	0.74	1.66	1.48
1	51	4	1	2	0	0	0	110	65	88	22.41	67	1	0	4.58	61.8	4.27	2.23	0.48	0.96	1.33	1.27
1	79	6	2	2	1	0	0	135	80	87	23.23	77	0	0	4.78	62.6	5.37	2.23	0.64	0.92	1.46	1.31
2	53	4	1	2	1	0	1	125	85	102	33.76	80	0	0	5.87	42.4	2.92	2.23	0.91	0.96	1.42	1.27
1	51	4	1	2	0	0	0	95	65	72	19.92	77	1	0	7.79	59.7	5.32	2.23	1.65	1.79	2.85	0.44
1	67	5	1	2	0	0	0	105	65	81	26.22	54	0	0	4.72	58.5	6.39	2.24	0.34	0.85	1.7	1.39
1	55	4	1	2	0	0	0	100	65	91	26.04	64	1	0	4.65	54.6	4.75	2.24	0.65	0.92	1.39	1.32
1	75	6	1	2	0	0	0	115	75	85	25.07	80	0	0	4.26	56.8	3.51	2.24	0.71	0.83	1.46	1.41
2	53	4	2	2	1	0	0	135	85	94	29.62	72	0	0	4.75	59.9	2.69	2.24	0.71	1.02	1.18	1.22
2	61	5	1	2	1	0	0	135	75	78	20.17	74	0	0	4.26	38.8	1.96	2.24	0.9	0.8	1.56	1.44
2	52	4	1	2	1	0	1	115	85	95	28.62	79	0	0	4.52	67	2.58	2.24	1.24	0.8	1.64	1.44
1	47	3	1	2	1	0	0	115	85	100	34.35	74	0	1	4.18	61.2	4.81	2.25	0.45	1.03	1.33	1.22
1	51	4	1	2	1	0	0	125	90	76	19.03	90	0	0	4.33	74.9	4.85	2.25	0.73	0.91	1.56	1.34
2	51	4	1	2	1	0	0	115	85	100	29.9	77	0	0	4.45	21.4	11.4	2.25	0.74	0.89	2	1.36
2	47	3	1	2	0	0	0	95	55	85	22.6	72	0	0	4.73	60	3.4	2.25	0.84	1	2.09	1.25
2	68	5	1	2	1	0	0	120	80	91	22.64	79	0	0	4.97	40.1	4.71	2.25	1.07	0.89	1.27	1.36
2	61	5	1	2	1	0	0	85	55	78	17.1	68	0	0	4.74	44.7	4.29	2.25	1.18	1.75	1.72	0.5
2	47	3	1	2	1	0	0	105	80	90	30.02	80	0	0	4.65	64.4	4.09	2.25	1.3	0.93	1.24	1.32
1	75	6	1	2	1	0	0	135	85	96	25.95	64	0	0	4.2	41.5	5.2	2.25	1.36	1.4	0.96	0.85
1	53	4	1	2	0	0	0	115	75	87	27.24	84	0	0	4.39	58.4	6.22	2.26	0.73	0.96	1.5	1.3
2	50	4	1	2	1	0	0	110	80	89	27.49	80	0	0	4.68	37	3.33	2.26	0.88	0.88	1.53	1.38
2	49	3	1	2	0	0	0	105	65	78	21.19	82	0	0	5.46	41.6	4.53	2.26	1.33	1.01	1.09	1.25
2	60	5	1	2	0	0	0	125	75	104	33.33	91	0	0	4.73	32.3	3.89	2.27	0.68	1	1.28	1.27
1	50	4	1	2	0	0	0	115	75	102	28.16	74	0	0	4.59	54	3.95	2.27	0.81	0.83	1.77	1.44
1	53	4	1	2	1	0	0	115	75	105	30.8	80	0	0	6.14	67.9	6.53	2.27	0.96	0.86	1.57	1.41
2	23	1	2	1	0	0	0	105	75	70	22.43	70	0	0	4.72	32.7	2.57	2.28	0.42	0.87	1.64	1.41
2	51	4	1	2	0	0	0	105	65	83	20.03	83	0	0	5.05	37.8	3.37	2.28	0.67	0.88	1.53	1.4
2	48	3	1	2	0	0	0	110	75	94	29.21	68	0	0	4.45	47.4	2.89	2.28	0.75	0.91	1.51	1.37
1	70	6	1	2	0	0	0	115	70	78	23.95	85	1	0	4.96	70.3	3.98	2.28	1.11	1	1.17	1.28
1	70	6	1	2	0	0	0	110	75	106	29.74	81	0	0	8.89	63.1	3.44	2.28	1.4	0.75	1.81	1.53
1	65	5	1	2	1	0	1	115	85	101	28.63	87	0	0	21.77	90	6.4	2.28	1.54	0.75	1.1	1.53
2	69	5	1	2	1	1	0	115	75	99	24	92	0	0	5.42	45.9	5.46	2.29	0.07	0.77	1.37	1.52
2	56	4	1	2	0	0	0	95	65	82	27.27	80	0	0	4.47	24.7	3.17	2.29	0.33	1	2.15	1.29
1	83	6	1	3	1	0	0	135	95	77	24.13	77	0	0	4.66	54.9	7.38	2.29	0.52	1.01	1.32	1.28
2	19	1	2	1	0	0	0	115	75	70	22.5	69	0	0	4.71	45.1	3.89	2.29	0.56	1.01	1.26	1.28
1	20	1	1	1	0	0	0	105	65	70	19.05	84	0	0	4.71	51.9	3.9	2.29	0.65	0.9	1.44	1.39
2	55	4	1	2	0	0	0	95	60	66	18.43	66	0	0	4.34	37.7	7.06	2.29	0.67	0.97	1.28	1.32
1	52	4	1	2	1	0	1	155	105	107	24.34	78	0	0	8.97	52.1	4.15	2.29	0.93	0.86	1.52	1.43
1	53	4	1	2	0	0	0	115	75	99	24.97	80	0	0	4.26	56.6	4.2	2.29	1.1	0.77	1.74	1.52
2	56	4	1	2	0	0	0	115	65	97	27.06	80	0	0	5.2	48.6	4.5	2.3	0.3	0.65	2.35	1.65
2	46	3	1	2	0	0	0	105	65	80	22.68	75	0	0	4.35	43.7	4.99	2.3	0.4	1.8	1.5	0.5
1	54	4	1	2	0	0	0	115	75	82	22.86	72	0	0	4.26	40.3	6.13	2.3	0.6	0.92	1.42	1.38
2	38	2	1	2	0	0	0	105	65	84	22.32	85	0	0	4.97	43.1	3.55	2.3	0.69	1.3	1.2	1
2	56	4	1	3	1	0	0	115	70	125	26.57	78	0	0	5.22	32.5	3.2	2.3	0.77	0.89	0.99	1.41
2	75	6	1	2	0	0	0	125	75	82	23.78	88	0	0	5.15	64.1	7.18	2.3	0.9	0.2	2.9	2.1
1	50	4	2	2	1	0	0	125	85	92	28.72	86	0	0	4.35	72.2	3.88	2.3	0.95	1.3	1.12	1
2	53	4	1	2	1	1	0	145	95	91	24.02	72	0	0	6.3	65	3.3	2.3	1	2.2	3.3	0.1
2	68	5	1	3	1	0	0	135	95	103	24.8	84	0	0	4.39	86.1	4.27	2.3	1.02	0.82	1.54	1.48
1	71	6	1	2	1	0	1	115	75	97	26.81	95	0	0	21.01	153	11.58	2.3	1.1	1.3	0.95	1
1	59	4	1	2	0	0	0	105	75	80	21.94	88	0	0	4.54	63.2	4.98	2.3	1.1	1.3	0.98	1
2	47	3	1	2	0	0	0	115	75	88	24.61	76	0	0	5.22	41.5	4.6	2.3	1.1	1.1	0.9	1.2
2	58	4	1	2	1	0	0	130	80	106	35.06	84	0	0	4.2	25.6	4.6	2.3	1.1	1.2	0.95	1.1
2	46	3	1	2	0	0	0	105	65	86	25.07	72	0	0	4.55	44.5	3.59	2.3	1.2	1.3	0.3	1
1	47	3	2	2	1	0	0	130	85	90	24.45	94	0	0	4.2	46	4.2	2.3	1.2	1.6	0.3	0.7
1	76	6	2	2	1	0	0	105	65	87	20.18	82	0	0	4.3	15.4	5.2	2.3	1.2	1.3	1.1	1
2	78	6	1	2	0	0	0	95	65	93	29.67	71	0	0	4.82	53.3	4.7	2.3	1.2	1.2	1.3	1.1
1	74	6	2	2	1	0	0	115	75	99	27.85	92	0	0	4.92	53.7	3.66	2.3	1.2	1.3	0.9	1
2	74	6	2	3	0	0	0	120	65	82	19.04	56	0	0	4.3	15.3	5.9	2.3	1.2	1.3	1	1
2	46	3	1	2	1	0	1	135	85	85	24.89	80	0	0	10.81	44.8	3.65	2.3	1.3	0.3	1.3	2
2	62	5	2	2	1	0	0	135	85	117	36.85	86	0	0	5.28	51.3	4.87	2.3	1.3	1.6	0.3	0.7
1	59	4	1	3	0	0	0	120	65	85	18.73	89	0	0	5	86.9	6.43	2.3	1.3	1.8	1.1	0.5
2	50	4	1	2	0	0	0	105	65	114	32.63	68	0	0	5.6	63	3.92	2.3	1.3	1.2	1.6	1.1
1	71	6	1	2	1	0	0	125	85	108	27.44	67	0	0	5.19	57.9	3.82	2.3	1.3	1.8	1.6	0.5
2	57	4	1	2	1	0	0	130	85	93	25.2	70	0	0	4.5	46.5	4.1	2.3	1.3	1.8	1.6	0.5
1	60	5	1	2	1	0	0	135	85	95	26.95	80	0	0	4.55	65.5	4.36	2.3	1.3	1.3	2.3	1
1	51	4	1	2	1	0	0	105	80	91	27.92	70	0	0	4.22	56.9	6.52	2.3	1.3	1.6	1.3	0.7
1	64	5	1	2	1	0	1	145	90	96	25.25	68	0	0	10.53	77.1	7.54	2.3	1.3	1.2	0.3	1.1
1	49	3	1	2	0	0	0	115	75	103	27.92	74	0	0	4.31	51.5	3.97	2.3	1.3	1.8	1.6	0.5
2	60	5	2	2	0	0	0	120	65	85	26.84	83	0	0	4.25	69	7.16	2.3	1.5	0.9	0.98	1.4
2	53	4	1	2	1	0	0	145	95	65	23.64	85	0	0	4.5	46	2.4	2.3	1.6	1.6	1.2	0.7
1	53	4	1	2	1	0	0	120	75	98	31.11	86	0	0	5.19	60	4.24	2.3	1.6	1.2	2.3	1.1
1	57	4	1	2	1	0	0	115	65	75	21.94	67	0	0	4.5	41.6	5.6	2.3	1.7	0.78	0.98	1.52
1	75	6	2	2	1	0	0	120	75	100	25.32	100	0	0	10.93	52.8	5.95	2.3	2.5	0.4	0.8	1.9
1	46	3	2	2	1	0	0	135	95	99	29.71	86	0	0	4.49	62.3	5.91	2.3	3.2	1.4	2.1	0.9
2	79	6	1	2	0	0	0	90	55	80	24.33	84	0	0	5.09	47.5	3.65	2.31	0.52	0.93	1.47	1.38
1	72	6	1	3	1	0	0	115	75	78	21.97	76	0	0	4.87	50.5	5.6	2.31	0.81	0.86	1.51	1.45
2	49	3	2	2	0	0	0	95	65	76	22.21	79	0	0	4.73	51.1	3.72	2.32	0.31	0.95	1.45	1.37
2	66	5	1	2	0	0	0	115	75	82	21.91	72	0	0	4.12	35.4	3.65	2.32	0.55	1.03	1.41	1.29
1	55	4	1	2	0	0	0	115	75	81	21.33	85	0	0	4.55	64.7	3.06	2.32	0.7	0.9	1.49	1.42
2	51	4	1	2	0	0	0	105	70	76	22.52	82	0	0	4.74	40	3.64	2.32	0.76	0.98	1.43	1.34
2	61	5	1	2	1	0	0	125	85	84	25.43	88	0	0	5.63	42.6	4.04	2.32	0.95	0.93	1.57	1.39
2	52	4	1	2	1	0	0	140	85	110	32.41	80	0	0	18.2	58	3.59	2.32	0.96	1.63	1.25	0.69
1	51	4	1	2	0	0	0	95	65	75	20.83	66	0	0	4.7	99	4.71	2.32	1.28	1.65	0.95	0.67
2	54	4	1	2	1	0	0	115	75	83	23.42	130	0	0	6.21	53.2	2.04	2.33	0.67	1.25	0.73	1.08
1	65	5	2	2	0	0	0	115	75	79	22.46	89	0	0	4.73	64.7	6.05	2.33	0.84	0.8	2.02	1.53
2	53	4	1	2	0	0	0	115	80	94	25.85	84	0	0	4.31	51.3	3.49	2.33	1.19	0.96	1.33	1.37
1	67	5	1	2	1	0	0	125	85	80	23.83	66	0	0	4.92	60.3	4.46	2.34	0.52	0.82	1.96	1.52
1	49	3	2	2	0	0	0	95	65	85	23.83	67	1	0	4.17	90	10.16	2.34	0.56	0.79	1.25	1.55
1	55	4	1	2	1	0	0	115	75	77	24.98	85	0	0	4.44	60.5	4.34	2.34	0.96	0.95	1.41	1.39
2	70	6	2	2	0	0	0	115	75	93	25.78	83	0	0	5.79	42.8	5.07	2.34	2.36	0.77	1.28	1.57
2	68	5	1	3	1	0	0	130	85	76	18.81	87	0	0	4.16	36	4.92	2.35	0.62	1.15	0.75	1.2
1	70	6	1	2	0	0	0	125	75	84	22.5	76	0	0	4.4	59.5	5.3	2.35	0.68	0.93	1.54	1.42
2	49	3	2	2	0	0	0	115	80	96	31.64	88	0	0	4.33	53.7	5.47	2.35	0.7	1	1.33	1.35
1	55	4	1	2	0	0	0	110	70	91	24.74	76	0	0	4.71	52	4.37	2.35	0.77	0.96	1.58	1.39
2	65	5	1	2	0	0	0	125	75	80	28.91	78	0	0	4.14	52.2	3.99	2.35	0.93	0.92	1.52	1.43
2	60	5	1	3	1	0	0	145	95	103	26.06	71	0	0	4.49	39.8	3.49	2.35	0.93	1.3	2.22	1.05
2	53	4	2	2	0	0	0	105	65	81	23.31	72	0	0	4.32	47	6.16	2.35	1.47	0.84	1.64	1.51
2	54	4	2	2	1	0	0	95	60	75	21.16	68	0	0	4.71	28.4	4.54	2.36	0.41	0.89	1.64	1.47
1	47	3	1	2	0	0	0	115	75	85	23.92	75	0	0	4.18	56.8	3.21	2.36	0.69	0.9	1.66	1.46
1	54	4	1	2	0	0	0	105	65	99	30.47	87	0	0	4.87	77.6	5.55	2.36	0.72	0.86	1.65	1.5
2	62	5	1	2	1	1	0	105	65	78	24.59	67	0	0	4.92	43.5	3.01	2.36	0.85	0.96	1.52	1.4
1	18	1	2	1	0	0	0	105	65	73	19.69	69	0	0	4.54	47.1	2.35	2.36	0.93	0.77	1.78	1.59
2	49	3	1	2	0	0	0	115	75	82	23.24	86	0	0	5.61	43.2	4.05	2.36	0.94	0.92	1.43	1.44
1	49	3	1	2	1	0	0	95	65	100	30.8	84	1	1	5.98	58.6	5.55	2.36	1.03	0.86	1.64	1.5
1	52	4	1	3	0	0	0	95	65	70	19.22	86	1	0	4.42	50.8	5.04	2.37	0.41	0.92	1.62	1.45
1	59	4	1	2	1	0	0	125	85	81	20.98	95	0	0	4.19	67.6	4.23	2.37	0.6	0.98	1.51	1.39
2	66	5	1	3	1	1	0	145	75	87	26.58	80	0	0	4.52	41.1	6.42	2.37	0.83	0.95	1.57	1.42
1	65	5	1	2	0	0	0	125	75	99	23.01	65	0	0	4.15	56	4.89	2.37	0.83	0.91	1.63	1.46
2	54	4	1	2	1	0	0	105	80	95	30.82	77	0	0	5.09	47.9	3.43	2.37	0.85	0.96	1.46	1.41
1	60	5	1	2	1	0	0	125	75	90	24.86	67	0	0	4.81	93	3.83	2.37	0.9	0.95	1.26	1.42
1	51	4	1	2	0	0	0	115	75	80	19.88	72	0	0	3.93	41.8	3.51	2.37	1.09	0.87	1.53	1.5
2	69	5	1	2	1	0	1	125	80	95	26.16	86	0	0	13.68	52.3	4.42	2.37	1.38	0.85	1.35	1.52
2	80	6	1	3	1	0	0	115	65	84	19.62	105	0	0	4.56	50.5	3.65	2.38	0.41	0.9	1.57	1.48
2	55	4	2	2	1	0	0	115	85	85	26.67	76	0	0	4.45	48.9	3.77	2.38	0.74	0.9	1.72	1.48
2	55	4	1	2	1	0	0	145	95	89	28.85	80	0	0	4.36	39.4	4.44	2.38	1.08	0.94	1.59	1.44
1	51	4	1	2	0	0	0	115	75	92	25.04	57	0	0	7.1	98.9	4.83	2.38	1.24	0.7	1.92	1.68
1	67	5	1	2	0	0	0	115	75	94	27.53	75	0	0	4.68	49.5	4.25	2.39	0.22	0.85	1.84	1.54
2	48	3	1	2	0	0	0	95	65	78	22.77	72	0	0	3.94	43.8	3.35	2.39	0.84	0.89	1.65	1.5
1	61	5	1	2	1	0	0	125	95	104	30.12	85	0	0	4.62	62.4	3.51	2.39	0.89	0.9	1.69	1.49
1	51	4	1	2	0	0	0	115	75	97	26.4	90	0	0	4.48	52.2	3.4	2.39	1.17	0.83	1.75	1.56
2	54	4	1	2	0	0	0	95	60	81	22.37	76	0	0	4.38	34.4	4.39	2.39	1.26	0.78	1.71	1.61
2	52	4	1	2	1	0	1	105	75	108	33.78	82	0	0	8.14	37.6	3.67	2.39	1.85	0.77	1.65	1.62
1	57	4	1	2	0	0	0	120	65	78	23.03	79	0	0	4.49	63.5	4.38	2.4	0.82	0.94	1.19	1.46
1	51	4	1	2	1	0	0	95	65	90	27.43	56	0	0	4.8	57.3	3.76	2.4	1.09	0.89	1.63	1.51
1	24	1	2	1	0	0	0	110	65	90	23.18	80	0	0	4.52	56.8	2.93	2.41	0.29	0.96	1.51	1.45
1	60	5	1	2	1	0	0	125	75	84	22.04	83	0	0	4.36	55.6	3.83	2.41	0.48	0.9	1.61	1.51
2	75	6	2	2	1	0	0	135	90	74	18.55	73	0	0	4.31	32.7	4	2.41	0.67	0.9	1.69	1.51
1	74	6	1	2	1	0	0	120	60	75	21.23	71	0	0	4.47	64.2	7.31	2.41	0.92	0.83	1.87	1.58
2	58	4	1	2	0	0	0	95	60	77	22.43	69	0	0	3.98	57.1	3.43	2.41	1.33	0.85	1.64	1.56
2	77	6	1	2	0	0	0	110	65	76	19.22	80	0	0	5.08	81	3.42	2.42	0.48	1.25	3.26	1.17
1	71	6	1	2	0	0	0	115	75	77	22.04	79	0	0	4.7	49.9	3.13	2.42	0.78	0.86	1.93	1.56
2	47	3	2	2	0	0	0	85	55	80	17.8	76	0	0	3.91	53.1	2.73	1.82	0.91	0.99	0.87	0.83
2	50	4	2	2	1	0	0	145	75	81	24.06	79	0	0	4.11	56.7	3.9	2.42	1.02	1.01	1.34	1.41
1	77	6	2	2	1	0	0	135	90	105	29.41	74	0	0	4.23	72.6	4.05	2.42	1.03	0.82	1.89	1.6
2	65	5	1	2	1	0	1	125	85	97	31.95	88	0	0	13.41	33.1	3.2	2.42	1.32	0.81	1.57	1.61
1	55	4	1	2	1	0	0	125	65	70	20.81	84	0	0	4.67	54.8	5.5	2.42	1.38	1.01	1.43	1.41
2	53	4	1	2	1	0	0	130	65	113	40	83	0	0	6.66	57	3.42	2.42	2.37	0.81	1.63	1.61
1	58	4	1	2	0	0	0	105	75	86	22.94	78	1	0	4.42	49.8	4.49	2.43	0.5	1.02	1.59	1.41
1	70	6	1	2	0	0	0	115	75	84	19.92	72	0	0	4.45	47.7	4.83	2.43	0.82	0.95	1.68	1.48
1	56	4	1	2	0	0	0	105	65	85	25.35	101	0	0	3.93	79.5	4.81	2.43	0.89	0.81	1.82	1.62
2	50	4	1	2	0	0	0	105	65	72	18.73	80	0	0	4.77	35.9	3.61	2.43	0.89	0.92	1.54	1.51
1	51	4	1	2	1	0	0	105	85	110	25.26	82	0	0	5.23	61.6	5.11	2.43	1.07	0.86	1.74	1.57
1	51	4	1	2	0	0	0	105	65	103	27.02	76	0	0	5.61	66.7	5.4	2.43	1.35	0.77	1.68	1.66
1	76	6	1	2	0	0	0	105	65	84	22.1	87	0	0	5.51	55.7	4.03	2.44	0.62	0.89	1.77	1.55
2	53	4	1	2	0	0	0	95	65	68	25.63	71	0	0	5	39.1	2.31	2.44	0.83	0.96	1.67	1.48
2	74	6	1	2	1	0	0	135	85	86	23.56	96	0	0	4.67	49.4	2	2.44	0.85	0.95	1.55	1.49
2	65	5	1	2	1	0	0	125	85	82	21.5	72	0	0	4.78	59.8	3.96	2.44	0.88	0.98	1.48	1.46
2	74	6	1	2	1	0	0	125	85	107	36.36	80	0	0	5.97	61.3	7.75	2.44	0.89	0.84	1.73	1.6
1	58	4	2	3	0	0	0	115	75	77	21.5	80	0	0	4.8	60.9	5.46	2.44	0.9	0.86	1.65	1.58
2	49	3	1	2	0	0	0	105	65	76	23.83	73	0	0	4.86	53.3	3.29	2.44	0.9	0.94	1.57	1.5
1	62	5	1	2	0	0	0	105	75	89	20.94	70	0	0	4.85	77	4.44	2.44	1.28	0.91	1.66	1.53
1	54	4	2	2	0	0	0	95	65	91	20.66	70	0	0	3.93	54.4	6.59	2.45	0.3	0.82	1.91	1.63
1	53	4	1	2	0	0	0	115	75	104	25.56	76	1	1	4.78	45.2	4.11	2.45	0.39	0.84	1.89	1.61
2	54	4	1	2	0	0	0	95	65	80	22.37	84	0	0	5.63	36.9	2.2	2.45	0.65	1.08	1.39	1.37
1	66	5	1	2	1	0	0	115	75	81	23.23	64	0	0	4.4	54.9	6.48	2.45	0.82	0.88	1.76	1.57
1	61	5	1	2	0	0	0	115	75	74	21.51	81	0	0	4.05	53.8	5.88	2.45	0.86	0.85	1.85	1.6
2	52	4	1	2	0	0	0	110	75	84	23.15	66	0	0	4.4	47.7	2.93	2.45	0.91	0.99	1.61	1.46
1	83	6	1	2	0	0	0	125	75	98	24.02	69	0	0	5.93	68.3	4.74	2.45	1.03	1.03	1.14	1.42
2	69	5	1	2	1	0	0	120	65	92	26.61	81	0	0	9.31	56.6	4.77	2.45	1.1	0.96	1.56	1.49
1	61	5	2	2	1	0	0	115	70	120	31.98	88	1	1	6.64	67.3	3.23	2.45	1.28	0.91	1.43	1.54
1	71	6	1	2	1	0	0	125	65	94	22.58	80	0	0	4.25	26.2	4.49	1.46	0.11	0.55	0.31	0.91
1	60	5	2	2	0	0	0	115	70	74	21.26	75	0	0	4.47	65	5.46	2.46	0.69	0.98	1.6	1.48
2	51	4	1	2	0	0	0	105	70	108	38.71	84	0	0	3.98	54.4	3.86	2.46	0.71	1.02	1.49	1.44
1	58	4	1	2	0	0	0	115	75	84	20.83	75	0	0	3.97	52.3	6.66	2.46	1.1	0.91	1.74	1.55
1	58	4	2	2	0	0	0	100	65	102	30.43	75	0	0	5.14	49.6	2.39	2.46	1.24	0.75	2.09	1.71
2	25	1	2	2	1	0	0	120	80	84	24.44	80	0	0	4.71	45.6	3.8	2.47	0.41	0.95	1.63	1.52
1	50	4	1	2	0	0	0	100	60	86	22.39	80	1	0	4.17	64.2	5.67	2.47	0.59	0.98	1.48	1.49
1	79	6	1	2	0	0	0	125	75	99	25.26	75	0	0	4.62	54.8	6.43	2.47	0.71	0.88	1.9	1.59
2	50	4	1	2	0	0	1	115	75	80	22.1	78	0	0	4.13	46.7	2.97	2.47	0.74	0.98	1.52	1.49
2	69	5	2	2	1	0	0	125	85	84	19.47	90	0	0	4.73	55.9	4.39	2.47	0.75	0.99	1.62	1.48
1	59	4	1	2	0	0	0	115	75	92	20.6	78	1	0	3.9	53.9	3.73	2.47	0.82	0.96	1.51	1.51
1	61	5	1	2	1	0	0	135	95	100	29.38	69	0	0	4.26	107.8	3.48	2.47	0.93	0.98	1.55	1.49
2	73	6	1	2	1	0	0	125	95	78	22.35	127	0	0	4.43	45.4	5.91	2.47	0.93	0.84	1.66	1.63
2	68	5	1	3	0	0	0	100	55	75	21.79	98	0	0	4.88	45.7	1.88	2.47	1	0.81	1.73	1.66
1	72	6	1	2	1	0	0	125	80	94	22.68	75	0	0	4.77	55.8	4.86	2.47	1.04	0.96	1.65	1.51
2	57	4	1	2	0	0	0	105	70	85	24.34	69	0	0	3.96	45.2	2.8	2.47	1.06	0.8	2	1.67
1	51	4	1	2	1	0	0	105	75	105	31.96	79	0	0	4.84	75	3.79	2.47	1.07	0.81	1.77	1.66
1	51	4	1	2	1	0	0	125	95	90	23.38	80	0	0	4.18	57.6	4.5	2.47	1.33	0.83	1.98	1.64
2	50	4	1	3	0	0	0	115	65	98	27.89	63	0	0	4.58	44.6	2.75	2.47	1.33	0.87	1.65	1.6
1	57	4	1	2	0	0	0	115	75	100	28.58	81	0	0	6.51	81.4	3.4	2.48	0.87	0.78	1.9	1.7
1	51	4	1	2	1	0	0	135	70	113	31.22	78	0	0	4.96	62	4.67	2.48	0.87	0.91	1.85	1.57
2	52	4	1	2	0	0	0	105	70	84	22.49	68	0	0	4.82	66.2	2.71	2.48	0.95	0.92	1.58	1.56
2	50	4	1	2	0	0	0	95	65	92	25.56	84	0	0	4.63	40.9	3.22	2.48	1.19	0.9	1.82	1.58
1	59	4	1	2	0	0	0	95	55	88	25.48	95	0	0	3.9	70.3	4.88	2.48	1.51	0.78	1.73	1.7
2	66	5	1	2	0	0	1	125	65	104	30.73	80	0	0	13.01	27.2	4.45	2.48	1.69	0.8	1.69	1.68
2	72	6	1	2	0	0	0	110	65	82	21.78	80	0	0	4.42	46.9	3.61	2.48	1.84	0.92	1.7	1.56
1	48	3	1	2	0	0	0	115	75	92	25.46	87	0	0	4.64	53.6	3.43	2.49	0.55	0.94	1.69	1.55
1	72	6	1	2	1	0	0	125	85	95	26.7	61	0	0	4.36	87.9	8.12	2.49	0.83	1.07	1.44	1.42
2	47	3	2	2	0	0	0	115	70	76	20.32	82	0	0	4.93	41.4	4.78	2.49	0.84	0.96	1.67	1.53
1	62	5	1	2	1	0	0	145	85	73	22.86	87	0	0	5.02	45.6	3.48	2.49	0.92	0.86	2.02	1.63
1	18	1	1	1	0	0	0	125	75	65	17.24	86	0	0	3.96	39.8	2.55	2.49	0.92	0.92	1.48	1.57
2	51	4	1	2	1	0	0	135	85	101	28.95	83	0	0	5.77	50.8	4.04	2.49	1.14	1.03	1.36	1.46
2	72	6	1	2	0	0	0	110	75	94	25.29	86	0	0	4.83	47.6	2.96	2.5	0.19	0.89	1.79	1.61
1	46	3	1	2	1	0	0	130	75	100	27.92	73	0	0	8.19	93.8	4.84	2.5	0.3	1.8	1.5	0.7
2	57	4	1	2	1	0	0	135	85	80	27.28	80	0	0	4.62	49.4	3.75	2.5	0.3	2	1.9	0.5
1	52	4	1	2	1	0	0	135	85	95	27.66	78	1	1	5.71	87	8.06	2.5	0.5	1.8	3.2	0.7
1	73	6	2	2	1	0	0	155	105	70	22.99	87	0	0	6.18	73.3	5.73	1.5	0.5	0.2	1.2	1.3
1	77	6	1	2	1	0	0	140	75	99	22.76	74	0	0	4.36	14.5	5.3	2.5	0.5	1.8	1.5	0.7
2	65	5	1	3	0	0	0	110	65	85	21.46	65	0	0	6.16	40.2	5.34	1.5	0.6	0.2	1	1.3
2	49	3	1	2	0	0	0	110	75	80	23.81	84	0	0	4.77	40.8	2.92	2.5	0.86	0.91	1.79	1.59
2	50	4	1	2	1	0	0	135	85	93	27.89	81	0	0	4.29	43.8	2.87	2.5	0.87	1.01	1.45	1.49
2	48	3	1	2	0	0	0	100	65	72	23.61	82	0	0	4.84	31.9	3.72	2.5	0.93	0.92	1.42	1.58
2	53	4	2	2	1	0	0	135	75	76	24.34	80	0	0	4.94	56.6	3.01	2.5	0.98	1.7	1.5	0.8
1	61	5	2	2	1	0	0	135	90	84	23.71	71	0	0	5.15	55.9	3.85	2.5	1.02	0.95	1.77	1.55
2	55	4	1	2	0	0	0	90	60	89	23.73	85	0	0	4.26	60.2	2.83	2.5	1.03	1	1.56	1.5
1	62	5	1	2	0	0	0	115	75	95	25.86	90	0	0	5.1	56.9	5.71	2.5	1.07	0.83	1.88	1.67
1	56	4	1	2	1	0	0	110	75	96	26.56	75	0	0	5.09	72.2	6.4	2.5	1.2	1.8	2.5	0.7
1	72	6	2	3	0	0	0	110	65	87	23.42	79	0	0	4.64	55.9	4.05	2.5	1.3	0.98	1.56	1.52
1	69	5	1	2	1	0	0	145	90	94	26.81	100	0	0	11.2	73.7	5.15	1.5	1.3	0.3	0.1	1.2
1	52	4	2	2	0	0	0	115	75	97	26.62	81	1	0	4.71	53.1	4.15	2.5	1.4	1.8	1.5	0.7
1	55	4	1	2	1	0	0	115	85	83	23.74	62	0	0	5.14	65.3	4.7	2.5	1.63	0.82	1.84	1.68
2	49	3	1	2	1	0	0	135	85	98	29.09	93	0	0	4.72	60.3	4.74	2.5	1.97	0.82	1.58	1.68
1	79	6	1	2	1	0	0	105	75	69	21.72	75	0	0	5.3	33.5	2.3	2.5	10.1	2.2	2.3	0.3
1	76	6	1	2	0	0	0	110	75	83	19.78	74	0	0	4.5	39.4	4.59	2.51	0.5	0.87	1.79	1.64
2	68	5	1	2	1	0	0	120	80	78	20.03	82	0	0	4.72	26.7	2.18	1.51	0.55	0.54	0.02	0.97
2	50	4	1	2	0	0	0	115	70	80	22.35	86	0	0	4.73	30.3	4.01	2.51	0.56	0.96	1.59	1.55
2	48	3	1	2	0	0	0	130	75	97	32.89	77	0	0	5.01	35.1	3.82	2.51	0.56	0.89	1.93	1.62
2	63	5	1	2	1	0	0	95	65	94	27.34	80	0	0	4.78	51.6	4.51	2.51	0.92	0.9	1.91	1.61
1	66	5	1	2	1	0	0	125	70	110	27.02	79	0	0	4.88	65.2	4.67	2.51	1.08	0.9	1.7	1.61
1	60	5	2	2	1	0	0	115	75	118	30.76	81	0	0	5.51	59	5.05	2.51	1.1	0.89	1.77	1.62
1	54	4	1	2	0	1	0	115	65	110	31.35	95	0	0	4.72	60.6	6.2	2.51	1.26	0.9	1.79	1.61
1	53	4	2	2	1	0	0	115	70	105	29.75	87	0	0	11.13	63.8	5.55	2.51	2.45	0.85	1.32	1.66
2	62	5	1	2	0	1	0	115	70	68	19.37	70	0	0	4.28	48.2	4.27	2.52	0.56	1.02	1.51	1.5
2	53	4	1	2	0	0	0	125	80	92	27.83	65	0	0	3.99	28.1	3.38	2.52	0.73	0.87	1.87	1.65
2	66	5	1	2	1	1	0	105	65	99	29.43	75	0	0	5.05	53.2	3.82	2.52	0.86	0.95	1.76	1.57
2	56	4	1	2	0	0	0	95	60	93	25.97	57	0	0	4.58	41.4	5.31	2.52	1.09	0.98	1.3	1.54
2	68	5	1	2	0	0	1	115	75	93	23.73	76	0	0	14.02	27.4	3.25	2.52	1.19	1.03	1.41	1.49
2	61	5	2	2	0	0	0	115	75	89	24.24	84	0	0	4.49	47.1	3.62	2.52	1.21	0.76	1.77	1.76
2	67	5	1	2	1	0	0	135	85	106	32.47	84	0	0	10.06	42.7	3.23	2.52	1.28	0.77	1.49	1.75
2	50	4	2	2	1	0	0	125	85	105	31.64	74	0	0	4.05	44.3	2.6	2.52	1.37	0.99	2.42	1.53
1	81	6	1	2	0	0	0	115	75	81	21.48	80	0	0	4.77	54.1	3.17	2.52	1.65	0.8	1.96	1.72
1	62	5	1	2	0	0	0	110	70	77	22.48	80	0	0	4.74	44.6	5.51	2.53	0.38	0.95	1.66	1.58
1	46	3	1	2	0	0	0	105	65	89	25.59	68	1	1	4.95	68.2	4.26	2.53	0.59	1.01	1.55	1.52
1	48	3	1	2	0	0	0	95	65	76	20.32	73	0	0	4.4	55.2	4.57	2.53	0.6	0.86	1.83	1.67
1	49	3	1	2	0	0	0	115	75	90	24.34	76	0	0	4	53.9	4.83	2.53	0.73	0.97	1.66	1.56
2	66	5	1	3	1	0	0	115	85	79	21.52	85	0	0	4.13	48.9	5.54	2.53	0.8	1.08	2.08	1.45
2	49	3	2	2	0	0	1	105	60	76	23.07	69	0	0	5.34	52.5	3.53	2.54	0.34	0.97	1.61	1.57
1	50	4	1	2	1	0	0	115	85	83	23.62	79	0	0	4	74.6	5.28	2.54	0.46	0.86	1.99	1.68
2	55	4	1	2	1	0	0	125	85	96	30.67	76	0	0	4.31	59.3	4.42	2.54	0.65	1.16	1.26	1.38
1	52	4	1	2	0	0	0	115	75	84	21.34	78	1	0	4.75	55.8	4.94	2.54	0.69	0.99	1.52	1.55
1	50	4	1	2	0	0	0	115	75	94	28.6	81	0	0	5.02	54.2	3.66	2.54	1.11	0.89	1.85	1.65
2	57	4	1	2	1	0	0	120	70	95	31.61	82	0	0	11.43	44.7	5.9	2.54	1.42	0.92	1.79	1.62
1	82	6	1	2	0	0	0	100	70	80	25.1	76	0	0	3.95	70.6	4.29	2.55	0.39	0.88	1.89	1.67
1	69	5	1	2	1	0	0	110	70	78	20.06	76	0	0	3.93	53.3	4.91	2.55	0.43	1.02	1.63	1.53
2	58	4	1	2	1	0	0	155	90	72	19.14	100	0	0	4.57	42.6	4.09	2.55	0.51	0.94	1.82	1.61
2	70	6	1	2	1	0	0	130	75	86	24.88	98	0	0	5.49	33.6	5.16	2.55	0.75	0.94	1.56	1.61
1	53	4	1	2	0	1	0	110	65	104	27.94	81	0	0	4.16	43.1	3.89	2.55	0.83	0.83	2.06	1.72
1	74	6	2	2	1	0	0	140	85	104	28.12	72	0	0	4.58	81.2	7.98	2.55	0.91	0.94	1.61	1.61
1	47	3	1	2	0	0	0	107.5	73.5	93	26.17	74	0	0	4.1	56.1	4.62	2.55	0.97	0.94	1.69	1.61
1	46	3	1	2	0	0	0	105	75	98	28.52	82	0	0	4.39	56.5	6.52	2.55	1.09	0.8	1.84	1.75
1	49	3	1	2	0	0	0	95	65	84	23.53	84	1	0	4.34	62.2	5.4	2.56	0.8	0.92	1.68	1.64
2	50	4	1	2	0	0	0	115	75	80	30.44	76	0	0	4.76	51.3	3.26	2.56	0.88	0.93	1.87	1.63
1	69	5	1	2	1	0	0	125	75	88	22.59	66	0	0	3.92	53.4	4.79	2.56	0.94	0.97	1.43	1.59
2	50	4	1	2	0	0	1	95	65	110	32.41	112	0	0	14.95	42.5	5.4	2.56	0.98	0.99	1.55	1.57
1	49	3	1	2	0	0	0	105	65	83	23.67	85	0	0	5.47	80	7.85	2.56	0.99	1.53	2.75	1.03
2	70	6	1	3	1	0	0	145	85	109	26.44	85	0	0	4.79	46.4	2.99	2.56	1.02	1.01	1.52	1.55
1	52	4	1	2	0	0	0	105	80	105	30.12	81	0	0	4.27	67.1	4.14	2.56	1.19	0.84	1.79	1.72
2	48	3	1	2	0	0	0	100	70	77	22.95	88	0	0	4.93	48.5	4.33	2.56	1.19	0.93	1.74	1.63
2	52	4	1	2	1	0	0	140	75	94	26.71	68	0	0	4.57	45.4	2.69	2.56	1.5	0.98	1.51	1.58
1	58	4	1	2	0	0	0	95	65	93	28.33	66	0	0	4.23	57.4	4.54	2.56	1.5	1	1.54	1.56
2	52	4	1	2	1	0	0	125	85	100	33.09	84	0	0	4.76	52.6	3.4	2.56	1.62	0.88	1.72	1.68
2	51	4	1	2	1	0	0	145	95	86	28.25	82	0	0	4.64	40.2	3.81	2.56	3.36	0.98	1.64	1.58
2	51	4	1	2	0	0	0	115	75	85	19.98	85	0	0	4.05	48	4.79	2.57	0.43	1.17	1.22	1.4
1	56	4	1	2	0	1	0	115	70	89	19.88	89	0	0	4.62	57.9	4.75	2.57	0.56	0.93	1.83	1.64
1	60	5	1	2	1	0	0	115	75	97	27.82	68	1	0	4.55	53.2	3.34	2.57	0.57	0.88	2.08	1.69
2	49	3	1	2	1	0	0	120	80	80	23.74	86	0	0	4.44	59.3	2.79	2.57	0.6	0.9	1.79	1.67
1	60	5	1	2	0	0	0	105	75	90	23.88	80	0	0	4.57	65.3	3.96	2.57	0.64	1.05	1.55	1.52
2	46	3	1	2	0	0	0	110	75	94	26.94	75	0	0	4.58	39.7	3	2.57	0.65	0.94	1.82	1.63
1	70	6	1	2	1	0	0	135	70	90	26.56	78	0	0	4.69	91	4.55	2.57	0.9	0.84	1.43	1.73
1	55	4	1	2	0	0	0	110	75	80	24.03	54	0	0	3.63	66.6	3.93	2.57	0.91	0.89	1.91	1.68
1	57	4	1	2	0	0	0	115	65	91	24.52	63	0	0	4.96	61.3	4.01	2.57	0.94	0.96	1.73	1.61
1	70	6	1	2	0	0	0	110	65	85	23.53	69	0	0	4.32	53.5	4.5	2.57	1.03	1.03	1.5	1.54
1	48	3	2	2	0	0	0	115	75	79	22.86	75	0	0	4.57	60.1	5.17	2.57	1.08	0.79	1.91	1.78
2	47	3	1	2	1	0	0	115	85	97	28.44	80	0	0	4.65	44.5	3.31	2.57	1.11	0.93	1.68	1.64
1	84	6	2	2	1	0	0	85	55	86	22.83	80	0	0	4.62	47.4	3.55	2.57	1.51	0.89	1.62	1.68
2	69	5	1	3	1	0	0	135	85	84	21.62	84	0	0	5.33	54.5	3.66	2.57	1.8	0.81	1.91	1.76
1	50	4	1	2	0	0	0	100	60	90	21.72	50	1	0	4.47	61.3	4.87	2.57	1.81	1.05	1.46	1.52
1	74	6	1	3	0	0	0	110	65	80	19.31	95	0	0	5.09	48.8	5.82	2.58	0.56	0.91	1.83	1.67
2	48	3	2	2	1	1	0	145	95	100	30.84	80	0	0	4.65	46.3	3.9	2.58	0.76	0.96	1.79	1.62
1	63	5	1	2	0	0	0	115	75	86	23.88	82	0	0	4.12	72.2	6.6	2.58	0.78	0.97	1.66	1.61
2	61	5	1	2	0	0	0	115	75	84	23.8	85	0	0	5.12	50	4.01	2.58	1.12	1.13	1.24	1.45
2	59	4	1	2	0	0	0	115	75	96	20.93	82	0	0	4.77	53.5	5.65	2.58	1.16	0.84	1.81	1.74
2	47	3	1	2	0	0	0	115	75	87	30.49	89	0	0	4.38	37.2	2.77	2.58	1.41	0.88	1.64	1.7
1	47	3	1	2	0	0	0	105	65	85	23.01	60	0	0	4.28	67.3	3.97	2.58	1.42	0.77	1.79	1.81
2	48	3	1	2	0	0	0	95	60	87	24.92	79	0	0	4.27	28.3	4.47	2.58	1.62	0.98	1.51	1.6
2	47	3	1	2	0	0	0	110	65	79	27.99	82	0	0	4.85	44.4	3.73	2.59	0.27	0.98	1.81	1.61
2	45	3	1	2	0	0	0	105	60	93	34.89	92	0	0	4.71	38.2	2.95	2.59	0.44	1.05	1.48	1.54
1	60	5	2	2	0	0	0	120	75	94	27.55	79	0	0	4.72	71.2	5.21	2.59	0.63	0.9	1.87	1.69
2	50	4	1	2	0	0	0	115	65	92	32.89	79	0	0	4.26	46.1	5.24	2.59	0.72	0.98	1.69	1.61
1	70	6	1	2	1	0	0	125	85	87	25.39	87	0	0	5.74	46	3.4	2.59	0.83	0.92	1.84	1.67
1	50	4	2	2	0	0	0	115	75	100	28.35	72	0	0	4.34	51.5	4.03	2.59	0.88	0.89	1.87	1.7
1	52	4	2	2	0	0	0	115	70	87	23.72	53	0	0	4.23	60.5	3.02	2.59	0.89	0.88	1.93	1.71
1	51	4	1	2	0	0	0	95	65	94	32.41	65	1	0	4.58	59	4.6	2.59	0.89	0.9	1.74	1.69
2	57	4	1	2	1	0	0	115	85	101	33.23	88	0	0	3.94	51.6	3.42	2.59	0.9	0.91	1.72	1.68
2	57	4	1	2	1	0	0	95	60	92	21.46	84	0	0	4.93	48.6	5.6	2.59	0.96	0.93	1.44	1.66
1	48	3	1	2	0	0	0	105	65	87	26.89	70	0	0	4.44	70.4	5.41	2.59	1.05	0.92	1.79	1.67
2	47	3	2	2	0	0	0	105	65	84	23.42	75	0	0	4.97	32.5	5.5	2.59	1.09	0.93	1.82	1.66
1	51	4	2	2	0	0	1	125	75	95	25.69	78	0	0	22.62	63	3.37	2.59	1.28	0.85	1.9	1.74
2	77	6	1	3	1	0	0	125	85	89	22.67	82	0	0	4.63	32.6	4.16	2.59	1.53	0.84	1.8	1.75
1	57	4	1	2	1	1	0	125	75	102	30.12	61	0	0	4.15	88	4.63	1.6	0.3	0.3	0.9	1.3
1	59	4	2	2	1	0	0	125	65	80	17.78	86	0	0	4.3	78.4	4.82	2.6	0.48	0.88	1.91	1.72
1	62	5	1	2	1	0	0	135	85	102	29.39	76	0	0	3.95	53.6	4.68	1.6	0.6	0.5	0.2	1.1
2	47	3	1	2	0	1	0	105	65	110	32.43	78	0	0	4.56	54.2	5.63	2.6	0.66	0.94	1.73	1.66
1	67	5	1	2	1	0	0	145	95	76	20.43	79	0	0	4.7	29.6	4.2	2.6	0.7	1.5	1	1.1
2	49	3	1	2	0	0	0	110	65	89	27.05	77	0	0	4.18	47.7	4.09	2.6	0.74	1.01	1.69	1.59
1	67	5	1	2	1	0	0	110	70	88	23.15	72	0	0	5.32	44.1	4.13	2.6	0.82	0.86	1.96	1.74
1	69	5	2	2	1	0	0	125	75	80	23.24	87	0	0	5.27	79.3	4.32	2.6	0.92	0.98	1.75	1.62
2	49	3	1	3	1	0	0	105	80	76	21.78	76	0	0	4.25	46.5	3.54	2.6	0.97	0.92	1.75	1.68
2	50	4	1	2	1	0	0	135	85	84	25.15	80	0	0	4.52	50.4	2.91	2.6	1.02	0.95	1.76	1.65
2	40	3	1	2	0	0	0	115	60	74	22.66	84	0	0	5.2	45.2	4.2	2.6	1.03	0.3	1.2	2.3
2	76	6	1	3	1	0	0	120	85	90	23.46	83	0	0	4.83	47	2.62	2.6	1.05	0.94	1.74	1.66
2	69	5	1	2	0	0	0	95	65	85	23.74	81	0	0	4.63	37.1	4.24	2.6	1.1	1.1	2.6	1.5
1	66	5	1	2	1	0	0	135	80	90	22.76	82	0	0	4.25	14.5	5.2	2.6	1.1	0.78	0.9	1.82
1	79	6	1	2	1	0	0	135	85	98	34.66	66	0	0	5.2	45.6	4.2	2.6	1.2	2	1.3	0.6
2	78	6	2	2	1	0	0	115	85	106	26.12	74	0	0	4.23	46.5	2	2.6	1.2	0.57	0.89	2.03
2	54	4	1	2	1	1	1	125	85	103	29.33	84	0	0	4.14	36.8	3.35	2.6	1.3	1.1	1.3	1.5
2	72	6	1	2	1	0	0	125	85	79	23.46	75	0	0	4.8	46	4.2	2.6	1.3	1.2	1.3	1.4
2	47	3	1	3	0	0	0	95	60	98	31.14	66	0	0	5.2	45	4.2	2.6	1.3	1.6	2.3	1
2	46	3	1	2	1	0	0	125	85	100	32.89	84	0	0	4.5	45	4.2	2.6	1.3	1.3	1.2	1.3
2	63	5	1	3	1	0	0	140	85	103	30.61	104	0	0	5.68	47.9	4.87	2.6	1.43	1.11	1.25	1.49
2	46	3	2	2	0	0	0	110	60	70	20.74	88	0	0	4.72	49.7	5.03	2.6	1.47	1.06	1.64	1.54
2	71	6	1	2	1	0	0	130	75	79	23.94	80	0	0	5.1	45.2	4.1	2.6	1.5	0.5	1.36	2.1
2	62	5	1	2	1	0	0	115	85	74	33.25	74	0	0	4.39	53.7	4.74	2.6	1.53	0.89	1.79	1.71
2	57	4	1	2	0	1	0	95	65	70	18.13	87	0	0	4.23	48.7	4.66	2.6	1.82	1.02	1.63	1.58
2	57	4	1	2	1	0	0	105	65	83	20.96	80	0	0	4.09	39.9	5.55	2.6	2.3	1.1	1.2	1.5
2	54	4	1	2	1	0	0	115	85	92	26.02	80	0	0	4.87	40.2	3.46	2.6	2.34	0.77	1.81	1.83
1	56	4	1	2	0	0	0	120	65	82	22.04	53	0	0	4.63	61.2	4.5	2.61	0.43	0.95	1.92	1.66
1	50	4	1	2	0	0	0	105	70	84	22.1	56	0	0	4.23	50.8	3.61	2.61	0.51	0.98	2.05	1.63
2	50	4	1	2	1	0	0	135	95	101	28.89	89	0	0	4.41	46.2	3.9	2.61	0.74	0.85	1.85	1.76
1	66	5	1	2	0	0	0	115	70	82	24.17	65	1	0	4.44	65.9	3.02	2.61	0.81	0.91	1.74	1.7
1	53	4	1	2	0	0	0	110	65	97	29.72	71	0	0	5.95	57.6	3.59	2.61	0.91	1.01	1.65	1.6
1	78	6	1	2	1	0	0	115	65	92	22.6	87	0	0	4.45	63.9	5.93	2.61	0.93	0.86	1.79	1.75
1	65	5	1	2	1	0	1	135	85	105	33.91	80	0	0	11.92	55.1	4.31	2.61	0.99	0.94	1.83	1.67
1	56	4	1	2	0	0	0	115	75	75	20.03	72	1	0	4.79	89.3	4.41	2.61	1	0.98	1.72	1.63
2	59	4	1	2	1	0	1	140	95	115	34.23	74	0	0	6.17	47.5	5.52	2.61	1.1	1.02	1.56	1.59
2	73	6	1	2	0	0	0	105	65	83	19.72	74	0	0	4.77	45.4	3.86	2.61	1.25	0.83	1.95	1.78
2	53	4	1	2	0	1	0	100	60	86	19.44	92	0	0	4.14	41.1	3.94	2.61	1.39	0.85	2.01	1.76
2	57	4	1	2	0	0	0	115	75	93	26.91	76	0	0	4.95	23.8	3.51	2.61	2.08	0.8	1.96	1.81
2	53	4	1	2	1	0	0	130	68.5	86	28.67	76	0	0	5.1	39	2.8	2.62	0.44	1.08	1.57	1.54
2	49	3	1	2	0	0	0	95	65	78	22.72	72	0	0	4.17	47.9	3.39	2.62	0.51	1.11	1.57	1.51
2	59	4	1	3	1	0	0	135	85	107	29.94	74	0	0	5.29	52.3	5.47	2.62	0.64	1.04	1.68	1.58
2	49	3	1	2	0	0	0	95	60	85	23.01	64	0	0	4.85	43.6	3.64	2.62	0.73	0.95	1.83	1.67
2	53	4	1	2	1	1	0	130	75	98	24.46	71	0	0	4.34	34.3	3.15	2.62	0.74	1.13	1.54	1.49
1	50	4	1	2	0	0	0	115	75	102	31.51	65	0	0	4.46	62.2	3.61	2.62	0.88	0.82	2.03	1.8
1	52	4	1	2	0	0	0	105	65	62	25.82	71	1	0	4.29	59.8	4.18	2.62	0.91	0.88	2.04	1.74
1	67	5	1	2	1	0	0	125	85	75	26.4	78	0	0	4.56	59.3	4.4	2.62	0.98	0.98	1.7	1.64
1	50	4	1	2	0	0	0	95	65	83	22.41	68	1	1	4.75	58.6	3.53	2.62	1.01	0.89	1.88	1.73
1	57	4	1	2	0	0	0	115	75	97	26.64	81	0	0	4.33	53.3	4.95	2.62	1.02	0.97	1.55	1.65
2	53	4	1	2	0	0	0	120	80	100	30.22	92	0	0	5.62	55.8	5.43	2.62	1.05	0.87	1.77	1.75
1	74	6	1	2	1	0	0	115	85	102	28.26	68	1	0	4.77	69.9	8.61	2.62	1.14	0.87	1.97	1.75
2	50	4	1	2	1	0	0	125	85	92	30.36	87	0	0	4.98	61.4	3.66	2.62	1.28	1.01	1.6	1.61
1	59	4	2	2	1	0	0	125	95	88	26.49	80	0	0	5.5	56.9	6.75	2.62	1.34	0.76	2.28	1.86
1	52	4	1	2	0	0	0	95	50	82	24.38	65	1	0	4.77	64.5	3	2.62	1.38	0.87	1.94	1.75
2	47	3	1	2	0	0	0	95	65	84	26.3	85	0	0	4.41	49.3	5.2	2.62	1.91	0.84	1.63	1.78
1	91	6	1	3	0	0	0	115	75	107	30.84	96	0	0	6.23	49.8	4.81	2.62	1.98	0.7	2.03	1.92
2	52	4	1	2	0	0	0	100	60	100	31.6	65	0	0	5.32	45.7	3.94	2.62	2.13	0.87	1.74	1.75
2	21	1	2	1	0	0	0	110	69	78	20.8	85	0	0	4.82	40.7	6.89	2.63	0.39	1.07	1.58	1.56
1	53	4	1	2	0	0	0	100	65	94	21.51	45	1	0	4.01	68.8	5.68	2.63	0.53	0.93	2.08	1.7
1	54	4	1	2	0	0	0	125	75	91	24.01	71	0	0	5.51	66.5	4.77	2.63	0.61	0.9	2.06	1.73
1	51	4	1	2	0	0	0	100	60	83	19.38	70	0	0	5.06	61.6	3.87	2.63	0.63	1	1.49	1.63
2	62	5	1	2	0	0	0	95	65	80	20.17	87	0	0	4.63	33	3.79	2.63	0.73	0.93	1.91	1.7
2	58	4	1	2	0	0	0	110	75	70	20.33	77	0	0	4.98	51.8	3.55	2.63	0.95	0.97	1.84	1.66
1	47	3	2	2	0	0	0	105	75	84	21.97	82	1	0	4.63	55.7	4.48	2.63	0.96	0.88	2.14	1.75
1	77	6	2	2	1	0	0	110	65	92	20.17	88	0	0	4.45	55.2	3.8	2.63	1.08	0.87	1.62	1.76
2	58	4	1	2	1	0	0	120	75	81	25.63	67	0	0	4.08	43.3	5.18	2.63	1.58	0.9	1.79	1.73
2	66	5	1	2	0	0	0	115	65	129	33.23	73	0	0	5.36	62.5	5.62	2.63	1.79	0.91	1.78	1.72
1	60	5	2	2	0	0	0	110	75	94	23.94	99	0	0	4.33	59.4	3.75	2.64	0.6	0.93	1.92	1.71
2	48	3	1	2	0	0	0	105	75	81	24.67	72	0	0	4.62	42.5	5.03	2.64	0.66	0.95	1.98	1.69
2	64	5	1	2	0	0	0	95	65	79	24.39	88	0	0	4.35	49.6	8.36	2.64	0.68	0.93	1.9	1.71
2	47	3	2	2	0	0	0	110	70	85	26.91	69	0	0	4.72	47.7	5.23	2.64	0.69	1.05	1.62	1.59
2	47	3	2	2	1	0	0	115	85	82	24.3	83	0	0	4.79	45.1	2.65	2.64	0.71	0.84	2	1.8
2	46	3	1	2	0	0	0	120	65	87	23.5	74	0	0	3.9	46.8	4.68	2.64	0.71	1.07	1.8	1.57
1	66	5	1	2	1	0	0	125	75	73	19.26	77	0	0	4.53	62	3.42	2.64	0.74	0.91	1.95	1.73
2	49	3	1	2	0	0	0	115	75	98	25.63	75	0	0	4.48	49.7	4.36	2.64	0.87	0.88	1.68	1.76
1	58	4	2	2	1	1	0	125	85	109	28.26	86	0	0	4.42	50	6.37	2.64	0.99	0.89	1.73	1.75
1	49	3	1	2	0	0	0	115	65	90	23.88	80	0	0	4.42	61.9	6.83	2.64	1.05	1.8	2.18	0.84
1	54	4	1	2	0	0	0	105	65	93	25.46	68	0	0	4.33	57.2	4.64	2.64	1.18	1.13	1.12	1.51
2	52	4	1	2	1	0	0	115	85	90	28.25	80	0	0	4.13	54.4	3.39	2.64	1.26	1	1.48	1.64
2	55	4	3	3	1	0	0	115	85	70	18.08	84	0	0	4.58	63.8	4.28	2.65	0.48	1.07	1.66	1.58
1	74	6	1	2	0	0	0	125	70	65	23.34	72	0	0	3.93	64.5	3.63	2.65	0.67	0.9	1.95	1.75
2	58	4	1	2	0	0	0	95	60	100	21.19	81	0	0	4.16	51.1	3.34	2.65	0.83	0.99	1.81	1.66
2	51	4	1	2	1	0	0	125	85	73	21.64	73	0	0	4.88	49.8	6.11	2.65	0.83	0.92	1.79	1.73
1	53	4	1	2	0	0	0	105	65	98	24.96	72	0	0	4.61	59.2	4.42	2.65	0.85	0.97	1.62	1.68
1	66	5	1	2	1	0	0	120	80	94	19.03	73	0	0	4.07	51.6	5.55	2.65	0.86	0.91	1.58	1.74
2	53	4	1	2	0	0	0	115	75	73	19.43	84	0	0	4.33	40.5	3.86	2.65	0.9	1	1.53	1.65
1	74	6	2	2	0	0	1	115	75	80	25.85	84	0	0	21.4	64.6	3.13	2.65	0.96	0.91	1.92	1.74
1	53	4	2	2	0	0	0	115	75	113	34.72	86	0	0	4.66	61.9	4.92	2.65	1.08	1.15	1.5	1.5
1	48	3	1	2	0	0	0	125	75	95	26.3	79	0	0	4.1	58.3	3.39	2.65	1.08	0.96	1.7	1.69
1	55	4	1	2	0	0	0	105	65	78	24.22	87	0	0	4.77	59.2	5.38	2.65	1.1	1.2	0.99	1.45
2	59	4	1	2	1	0	0	135	65	92	29.55	71	0	0	4.61	45.1	4.07	2.65	1.1	2	1.8	0.65
1	50	4	1	2	1	1	1	125	85	104	26.73	84	0	0	4.52	56.9	4.8	2.65	1.34	0.85	1.94	1.8
2	69	5	1	2	0	0	0	120	75	95	23.74	80	0	0	5.67	64.9	7.69	2.65	1.38	0.89	2.08	1.76
2	53	4	1	2	0	0	0	105	65	84	23.19	84	0	0	4.68	34.4	4.28	2.65	1.5	1.05	1.53	1.6
2	66	5	1	2	1	0	1	125	75	125	31.96	68	0	0	26.33	50.1	4.63	2.65	1.59	1.03	1.31	1.62
2	74	6	1	3	1	0	0	145	95	88	24.45	84	0	0	3.96	39	2.9	2.65	1.86	0.99	1.63	1.66
2	58	4	2	3	1	0	0	135	90	83	23.61	86	0	0	5.16	41.7	5.73	2.66	0.38	1.23	1.25	1.43
2	73	6	2	3	1	0	0	115	75	97	21.93	88	0	0	4.31	44.8	3.33	2.66	0.49	1.08	1.63	1.58
2	46	3	1	2	0	0	0	100	70	77	22.43	87	0	0	4.37	38.8	5.71	2.66	0.6	0.87	2.02	1.79
1	47	3	2	2	1	0	0	155	95	96	24.16	92	1	0	5.23	73.4	5.07	2.66	0.84	0.95	1.8	1.71
2	53	4	1	2	1	0	0	125	85	76	23.31	87	0	0	4.77	53.8	4.17	2.66	0.85	1.02	1.66	1.64
1	74	6	1	2	1	0	0	105	75	85	25.24	67	0	0	4.39	50.7	8.16	2.66	0.85	0.92	1.93	1.74
1	52	4	1	2	0	0	0	95	60	95	22.32	84	1	1	5.73	61.8	4.44	2.66	1	0.92	1.63	1.74
2	46	3	1	2	0	0	0	115	65	98	29.59	70	0	0	4.74	41.6	3.86	2.66	1.01	0.84	2.01	1.82
1	50	4	1	2	0	0	0	115	75	90	26.96	62	0	0	4.11	50	6.27	2.66	1.19	0.76	1.98	1.9
1	54	4	1	2	0	0	0	105	65	100	27.66	76	0	0	3.97	62.3	5.55	2.66	1.23	0.79	2.15	1.87
2	63	5	1	2	0	0	0	110	65	80	20.17	70	0	0	5	46.2	4.51	2.66	1.26	0.92	1.66	1.74
1	72	6	1	2	1	0	0	115	70	97	23.88	70	0	0	4.37	52.4	5.93	2.66	1.26	0.75	2.04	1.91
1	54	4	1	2	0	0	0	130	75	100	27.02	72	0	0	5.14	53.7	6.55	2.66	1.31	0.91	1.84	1.75
2	62	5	1	2	1	0	0	95	75	102	33.56	81	0	0	4.42	45	3.6	2.66	1.38	1.03	1.7	1.63
2	46	3	1	2	0	0	0	115	75	105	28.51	70	0	0	4.74	47.2	2.99	2.66	1.61	0.83	2.01	1.83
2	53	4	1	2	1	0	0	160	95	115	29.73	85	0	0	5.02	45.9	3.29	2.66	1.63	0.88	1.96	1.78
1	74	6	1	2	1	1	0	140	82.5	78	19.03	72	0	0	4.01	57.8	6.43	2.67	0.47	0.87	2.03	1.8
1	62	5	1	2	0	0	0	100	65	83	22.48	78	0	0	4.03	54.8	4.39	2.67	0.7	1.02	1.82	1.65
1	79	6	1	2	1	0	0	135	80	65	23.56	67	0	0	4.26	67.4	5.56	2.67	0.71	0.87	2.08	1.8
2	50	4	1	2	0	0	0	125	75	90	29.55	71	0	0	4.13	52.2	5.38	2.67	0.76	0.95	1.94	1.72
2	49	3	1	2	1	0	0	135	85	86	23.37	80	0	0	4.76	37.8	3.3	2.67	0.77	1.1	1.65	1.57
1	69	5	1	2	0	0	0	115	75	73	19.14	67	0	0	4.16	51.8	3.88	2.67	1.1	0.83	1.8	1.84
2	53	4	1	2	0	0	0	115	75	94	29.48	66	0	0	5.64	48.1	4.85	2.67	1.44	0.96	2.02	1.71
1	55	4	1	2	0	0	0	100	65	74	24.01	60	0	0	4.01	45.9	2.04	2.67	1.47	0.9	1.69	1.77
2	54	4	1	2	0	0	0	115	75	102	36.31	89	0	0	5.3	46.8	3.67	2.67	2.37	0.7	2.07	1.97
2	52	4	1	2	1	0	0	130	80	91	30.06	61	0	0	4.07	40.9	5.09	2.68	0.64	0.95	1.78	1.73
2	56	4	1	2	1	0	0	125	85	109	28.65	71	0	0	4.43	53.8	4.99	2.68	0.7	1	1.72	1.68
2	50	4	1	2	0	0	0	95	65	78	20.57	76	0	0	4.83	40.3	3.4	2.68	0.72	1.1	1.52	1.58
1	69	5	1	2	0	0	0	120	75	98	29.07	87	0	0	4.17	57.4	3.26	2.68	0.75	1	1.1	1.68
2	47	3	1	2	1	0	0	135	80	90	27.59	86	0	0	5.06	48.9	3.48	2.68	0.78	1	1.1	1.68
2	52	4	1	2	0	0	0	95	65	75	23.5	53	0	0	4.71	47.3	5.89	2.68	0.79	0.95	1.91	1.73
1	63	5	1	2	1	0	0	115	85	80	19.15	68	0	0	4.81	58	2.37	2.68	0.8	1.04	1.67	1.64
2	55	4	1	2	1	0	0	145	95	114	33.65	78	0	0	4.17	57.6	5.19	2.68	0.84	1.05	1.64	1.63
2	52	4	1	3	1	0	0	115	90	80	21.88	76	0	0	5.24	44.2	3.89	2.68	0.85	1.01	1.69	1.67
2	53	4	1	2	0	0	0	105	75	90	24.65	83	0	0	4.04	43.2	3.27	2.68	0.91	0.96	1.86	1.72
1	57	4	1	2	1	0	0	95	65	85	19.81	86	0	0	4.68	72.7	4.03	2.68	0.92	0.97	1.92	1.71
2	59	4	1	2	0	0	0	110	75	100	24.49	78	0	0	4.22	54	3.19	2.68	1.03	0.97	1.79	1.71
1	56	4	2	2	1	0	0	125	95	89	29.34	76	0	0	4.17	64.7	3.87	2.68	1.1	1.2	0.88	1.48
1	50	4	1	2	0	0	0	115	75	94	30.47	81	1	0	4.59	67.2	5.25	2.68	1.14	0.91	1.9	1.77
2	62	5	1	2	0	0	0	125	70	91	22.83	87	0	0	4.84	47.2	5.73	2.68	1.33	0.97	1.75	1.71
2	58	4	1	2	0	0	0	105	65	92	30.73	86	0	0	4.57	49.3	5.15	2.68	1.35	0.89	1.95	1.79
1	58	4	1	2	0	0	0	95	65	90	23.95	72	0	0	4.78	60.9	5.79	2.68	1.5	0.92	1.83	1.76
1	56	4	1	2	1	0	0	135	80	94	26.45	85	0	0	4.66	71.9	3.75	2.68	5.6	0.76	1.83	1.92
2	58	4	1	2	0	0	0	105	65	78	21.76	80	0	0	4.05	39.4	4.65	2.69	0.27	1.04	1.71	1.65
1	77	6	1	2	1	0	0	135	65	85	25.82	85	0	0	5.31	48.1	5.32	2.69	0.7	1.85	1.1	0.84
2	65	5	3	2	1	0	0	115	85	75	20.82	91	0	0	4.93	60	4.55	2.69	0.71	1.02	1.29	1.67
2	55	4	1	2	1	0	0	120	80	94	28.4	81	0	0	4.1	15.6	4.7	2.69	0.78	1.2	1.1	1.49
2	53	4	1	2	0	0	0	100	65	98	30.7	70	0	0	4.65	48.3	3.52	2.69	0.87	1.6	1.1	1.09
2	60	5	1	2	0	0	0	95	70	93	25.72	82	0	0	4.06	47.6	2.88	2.69	0.99	0.94	1.82	1.75
1	49	3	1	2	0	0	0	105	75	88	22.84	70	0	0	5.01	69.6	5.68	2.69	0.99	1.65	1.1	1.04
1	58	4	1	2	1	0	1	150	85	103	29.02	72	0	0	7.43	58.2	3.92	2.69	1	1.6	0.98	1.09
1	58	4	1	2	1	0	0	150	85	103	29.02	72	0	0	7.43	58.2	3.92	2.69	1	1.6	0.98	1.09
1	49	3	1	2	0	0	0	105	65	88	24.62	76	1	0	4.4	81.1	4.08	2.69	1.02	0.87	1.9	1.82
1	83	6	1	2	1	0	0	115	85	88	21.63	67	0	0	4.72	66.5	5.84	2.69	1.02	0.91	2.06	1.78
2	66	5	1	2	0	0	0	95	65	85	19.72	80	0	0	4.07	50.3	4.5	2.69	1.02	1.1	1.48	1.59
2	67	5	1	2	1	0	0	125	85	85	22.64	80	0	0	4.39	47.6	2.48	2.69	1.06	0.92	1.77	1.77
1	54	4	1	2	0	0	0	110	65	96	30.86	70	0	0	4.24	72.1	3.41	2.69	1.08	0.81	2.01	1.88
1	71	6	2	2	1	0	0	120	75	95	26.78	94	0	0	4.01	69.8	4.36	2.69	1.1	1.8	0.98	0.89
2	71	6	1	3	0	0	0	115	65	78	22.6	73	0	0	4.1	15.1	5.3	2.69	1.1	1.3	1.1	1.39
1	67	5	1	2	1	0	0	135	85	89	25.1	71	0	0	4.66	52.6	4.34	2.69	1.1	0.98	1.2	1.71
1	52	4	2	2	0	0	0	115	75	84	23.2	63	0	0	4.47	66.1	6.42	2.69	1.1	0.88	1	1.81
1	51	4	1	2	1	0	0	105	80	112	31.74	80	1	1	6.08	62.2	4.63	2.69	1.1	0.88	1	1.81
1	50	4	1	2	1	0	0	115	85	97	22.51	78	0	0	4.99	72	7.63	2.69	1.1	1.1	0.88	1.59
1	84	6	1	2	0	0	0	110	70	88	25.07	80	0	0	4.63	65.7	4.23	2.69	1.11	0.98	1.79	1.71
2	48	3	1	2	0	0	0	100	60	97	25.63	71	0	0	5.49	56.5	3.67	2.69	1.27	0.96	1.61	1.73
2	55	4	1	2	0	0	0	105	65	80	24.88	80	0	0	4.85	41.2	4.62	2.69	1.27	0.87	1.88	1.82
1	48	3	1	2	1	0	0	125	80	108	29.07	77	0	0	4.26	65.8	3.41	2.69	1.81	0.76	2.34	1.93
1	59	4	1	3	0	0	0	115	75	85	34.15	72	1	1	4.81	60.7	5.77	2.69	2.26	0.72	2.13	1.97
2	50	4	1	2	0	0	0	115	70	100	32.84	74	0	0	3.96	43.3	2.67	2.7	0.64	1.16	1.56	1.54
2	66	5	1	3	1	0	0	125	90	89	25.81	90	0	0	4.1	40.1	4.06	2.7	0.75	0.98	1.77	1.72
1	66	5	2	2	1	1	0	125	80	92	28.91	72	0	0	4.14	59.4	5.07	2.7	0.8	0.93	1.98	1.77
1	77	6	1	2	1	0	0	150	90	100	22.94	80	0	0	4.59	56.6	5.34	2.7	0.87	0.92	2.03	1.78
1	52	4	2	2	0	0	0	115	75	100	22.99	88	1	1	7.96	53.8	5.35	2.7	0.88	0.97	1.87	1.73
1	54	4	1	2	0	0	0	105	65	86	24.91	62	0	0	4.16	57	7.52	2.7	0.88	0.87	1.82	1.83
2	66	5	1	2	1	1	0	110	85	83	18.03	84	0	0	5.74	52.6	4.27	2.7	0.94	0.95	1.85	1.75
2	46	3	1	3	0	0	0	105	65	77	23.81	88	0	0	4.49	41.6	5.19	2.7	0.99	0.89	1.98	1.81
2	49	3	2	2	0	0	0	115	75	87	24.56	67	0	0	4.54	47.9	4.85	2.7	1.03	0.93	1.96	1.77
1	48	3	2	2	0	0	0	115	65	94	24.28	82	0	0	4.23	56.3	3.27	2.7	1.13	0.88	2.03	1.82
2	65	5	1	3	0	0	0	115	75	82	19.88	80	0	0	5.52	34.8	5.93	2.7	1.13	0.88	1.72	1.82
2	47	3	1	2	0	0	0	105	75	98	29.3	84	0	0	4.72	42.2	3.32	2.7	1.34	0.88	2.01	1.82
2	70	6	1	2	1	0	0	125	85	82	23.74	72	0	0	5.59	45.1	6.68	2.7	1.35	0.89	1.57	1.81
1	55	4	1	2	1	1	0	115	75	107	30.04	69	1	1	4.69	61.3	6.03	2.7	1.56	0.86	2.06	1.84
2	47	3	1	2	0	0	0	95	60	75	21.64	71	0	0	5.09	24	3.99	2.7	1.65	1.6	0.44	1.1
2	65	5	1	2	0	0	0	115	75	92	24.65	88	0	0	6.81	45.3	3.33	2.7	2.3	0.94	1.72	1.76
1	68	5	1	3	1	0	0	115	70	100	24.54	87	0	0	5.89	57	4.49	2.7	7.78	0.92	1.76	1.78
2	66	5	1	3	0	0	0	110	60	76	21.93	88	0	0	4.84	55.9	3.99	2.71	0.56	1.02	1.72	1.69
1	63	5	1	2	0	0	0	115	65	80	20.45	85	0	0	5.94	65.9	4.49	2.71	0.61	0.97	1.93	1.74
2	48	3	1	2	0	0	0	95	60	74	21.77	84	0	0	4.78	47.3	4.2	2.71	0.62	0.98	1.85	1.73
2	25	1	2	2	0	0	0	115	75	72	25.53	75	0	0	4.79	40.5	2.95	2.71	0.63	0.93	1.89	1.78
2	53	4	1	2	1	0	0	125	75	87	30.67	61	0	0	4.84	39.9	2.5	2.71	0.64	1	1.68	1.71
1	59	4	2	2	1	0	0	145	95	91	25.65	69	1	0	3.95	63.3	3.81	2.71	0.69	0.78	2.14	1.93
1	49	3	2	2	0	0	0	115	75	86	25.78	86	0	0	4.88	59.8	4.04	2.71	0.81	0.97	1.94	1.74
1	55	4	1	2	0	0	0	115	75	89	32.43	76	0	0	5.32	54.9	6.81	2.71	0.82	0.95	1.67	1.76
2	50	4	1	2	0	0	0	110	60	92	31.63	84	0	0	4.47	30	3.36	2.71	0.85	1.03	1.63	1.68
2	51	4	1	2	0	0	0	115	75	78	20.89	77	0	0	6.02	67	5.38	2.71	0.85	1	1.2	1.71
2	66	5	1	2	0	0	0	105	65	80	21.22	76	0	0	4.59	38.6	3.13	2.71	0.94	1.08	1.47	1.63
2	58	4	2	2	1	0	0	145	95	96	27.82	84	0	0	3.99	38.6	6.49	2.71	0.95	1.05	1.61	1.66
2	72	6	1	3	1	0	0	145	75	90	24.44	88	0	0	4.41	30.2	2.96	2.71	0.96	0.9	1.81	1.81
2	71	6	1	2	1	0	0	145	95	100	30.67	86	0	0	4.6	56.3	3.13	2.71	0.98	1.06	1.68	1.65
1	21	1	2	1	0	0	0	115	65	85	24.8	84	0	0	4.61	57.9	4.13	2.71	1.03	0.92	1.84	1.79
1	55	4	1	2	0	0	0	125	75	90	24.09	82	0	0	4.66	59.5	4.24	2.71	1.09	0.96	2.15	1.75
1	71	6	3	2	0	0	0	105	65	100	23.12	77	0	0	8.58	63.5	4.05	2.71	1.14	0.84	1.76	1.87
2	48	3	1	2	0	0	0	95	65	87	25.54	82	0	0	4.85	72	7.36	2.71	1.21	0.89	1.38	1.82
1	47	3	1	3	1	0	0	115	85	97	24.68	84	1	0	4.59	62.1	3.47	2.71	1.32	0.87	1.95	1.84
2	50	4	1	2	1	0	0	105	80	97	30.43	79	0	0	4.37	67.8	2.73	2.71	1.42	0.94	1.78	1.77
1	49	3	2	2	0	0	0	95	65	80	21.38	85	1	1	3.94	63.9	3.58	2.71	1.43	0.82	1.84	1.89
1	73	6	1	2	1	0	0	115	75	97	29.72	82	0	0	4.23	71.9	3.85	2.71	1.76	0.85	1.69	1.86
1	53	4	2	2	0	0	0	95	65	90	22.2	78	1	0	4.89	61.2	3.66	2.72	0.27	0.98	1.84	1.74
2	51	4	1	2	1	0	0	120	80	82	22.81	87	0	0	4.7	48.6	3.68	2.72	0.32	0.95	1.98	1.77
1	56	4	1	3	0	0	0	115	75	92	23.62	80	0	0	4.43	32.6	3.36	2.72	0.34	0.9	1.92	1.82
2	21	1	2	1	1	0	0	95	65	64	16.59	76	0	0	4.84	32.8	4.88	2.72	0.4	0.88	1.98	1.84
2	48	3	1	2	0	0	0	95	65	78	23.6	82	0	0	4.66	45.1	3.48	2.72	0.75	0.93	1.99	1.79
1	48	3	1	2	0	0	0	125	80	120	34.78	78	0	0	4.87	64.7	2.63	2.72	0.94	0.92	2.07	1.8
2	60	5	1	2	1	0	0	115	80	98	30.08	109	0	0	4.83	62.1	5.3	2.72	1	1	1.87	1.72
2	68	5	1	2	1	0	0	125	75	80	21.58	56	0	0	3.97	39.3	3.36	2.72	1.05	1.03	1.55	1.69
2	61	5	1	2	1	1	0	130	65	88	23.01	80	0	0	4.38	52.1	3.96	2.72	1.49	0.88	2.03	1.84
1	59	4	2	2	1	0	0	135	85	99	27.94	84	0	0	4.64	59.5	4.11	2.72	2.51	0.78	1.98	1.94
2	53	4	1	3	1	0	0	145	95	74	20.8	67	0	0	4	39	4.83	2.73	0.46	0.97	1.85	1.76
1	54	4	1	2	0	0	0	105	65	82	23.53	69	0	0	4.44	52.3	4.05	2.73	0.46	0.95	1.9	1.78
1	80	6	2	2	1	1	1	125	85	92	21.05	74	0	0	4.92	78.4	4.58	2.73	0.67	0.83	1.97	1.9
1	54	4	1	2	0	0	0	115	65	83	24.34	79	0	0	4	55.2	3.75	2.73	0.73	1.04	1.79	1.69
1	56	4	1	2	1	0	0	120	65	90	22.41	60	0	0	8.61	46	4.58	2.73	0.86	0.97	1.55	1.76
1	76	6	1	2	0	0	0	105	75	90	24.3	86	0	0	4.42	45.7	6.98	2.73	0.92	0.85	1.89	1.88
2	50	4	1	2	1	0	0	125	85	100	30.46	83	0	0	4.25	40.3	4.44	2.73	0.96	0.96	1.97	1.77
2	52	4	1	2	1	0	0	132.5	85	88	27.56	84	0	0	4.73	47.7	6.03	2.73	1.07	0.92	1.87	1.81
2	46	3	2	2	0	0	0	115	70	68	20.36	78	0	0	3.95	49.1	4.75	2.73	1.07	1.07	1.6	1.66
1	69	5	1	2	1	0	0	125	90	81	34.45	84	0	0	4.79	55.3	7.04	2.73	1.14	0.85	1.69	1.88
2	37	2	1	2	0	0	0	100	65	84	23	76	0	0	4.26	43.7	4.02	2.73	1.47	0.86	2.03	1.87
1	72	6	1	2	0	0	0	110	70	97	24.75	73	0	0	5.01	73.7	3.39	2.73	1.51	0.81	1.84	1.92
2	58	4	2	2	1	0	1	130	85	92	26.71	80	0	0	14.25	34.2	2.55	2.73	1.52	0.78	2.12	1.95
1	72	6	1	2	1	0	0	135	70	85	22.72	80	0	0	4.57	67.4	3.28	2.73	1.79	0.84	1.75	1.89
2	47	3	1	2	0	0	0	105	65	92	30.3	88	0	0	6.89	50	3.44	2.73	2.03	0.79	2.08	1.94
2	49	3	1	2	1	0	0	125	85	100	28.35	72	0	0	5.84	44.3	5.23	2.73	2.22	0.83	1.81	1.9
2	79	6	1	2	1	0	0	125	65	86	22.67	100	0	0	6.57	39.7	2.75	2.74	0.27	0.86	2.2	1.88
2	74	6	1	2	0	0	0	115	75	69	18.72	76	0	0	4.28	37.8	2.52	2.74	0.56	0.95	1.78	1.79
1	61	5	1	2	1	0	0	145	95	87	22.27	74	0	0	4.65	49.6	6.01	2.74	0.63	0.98	1.9	1.76
2	49	3	1	2	1	0	0	115	85	78	25.56	79	0	0	4.26	45.7	4.69	2.74	0.87	0.89	2.04	1.85
1	67	5	2	2	0	0	0	115	75	79	20.32	80	0	0	4.31	56.4	4.57	2.74	0.99	0.9	1.68	1.84
1	69	5	1	2	1	0	0	140	80	91	25.34	64	0	0	5.14	51.2	8.29	2.74	1.08	1	1.66	1.74
2	49	3	1	2	0	0	0	90	60	70	17.51	84	0	0	4.56	36.8	4.29	2.74	1.14	0.96	1.61	1.78
2	48	3	1	2	1	0	0	125	85	86	24.84	81	0	0	4.25	50.7	5.85	2.74	1.16	0.94	1.89	1.8
2	52	4	2	2	1	0	0	125	85	91	26.99	84	0	0	4.37	48.4	3.2	2.74	1.2	0.88	1.8	1.86
2	63	5	1	2	0	0	0	125	75	102	27.94	85	0	0	4.29	38	3.83	2.74	1.32	0.88	1.89	1.86
1	57	4	1	2	1	0	0	135	90	118	38.96	80	0	0	4.39	72.5	3.79	2.74	1.36	0.95	1.94	1.79
1	62	5	2	2	0	1	0	125	75	112	28.55	62	0	0	4.12	38.9	4.14	2.74	1.38	0.97	1.75	1.77
1	56	4	1	2	1	0	1	125	85	115	21.19	78	0	0	11.15	57.8	4.13	2.74	3.7	0.87	1.95	1.87
2	69	5	1	2	1	0	0	150	90	70	18.02	94	0	0	3.95	53.6	4.53	2.75	0.26	1.14	1.53	1.61
2	51	4	1	2	0	0	0	115	75	96	27.63	79	0	0	4.67	48.1	6.34	2.75	0.54	0.95	1.93	1.8
1	62	5	1	2	1	0	0	115	85	109	32.88	86	0	0	6.45	54	4.36	2.75	0.71	0.95	2.03	1.8
1	72	6	1	2	0	0	0	115	75	81	19.2	70	0	0	4.38	73.8	4.88	2.75	0.71	1.05	1.76	1.7
1	53	4	1	2	0	0	0	115	75	89	25.63	85	0	0	4.02	68.3	5.63	2.75	0.75	0.96	1.76	1.79
1	72	6	1	2	0	0	0	95	65	80	21.77	80	0	0	4.53	43.8	4.33	2.75	0.83	1.01	1.77	1.74
1	70	6	2	2	1	0	0	120	85	88	22.04	76	0	0	4.22	53.8	3.99	2.75	0.87	0.98	1.95	1.77
2	56	4	1	2	1	0	0	115	85	102	31.2	87	0	0	3.93	23	3.89	2.75	0.89	0.89	2.08	1.86
1	63	5	1	2	0	0	0	115	75	117	32.99	85	0	0	5.19	57.5	3.03	2.75	0.96	0.88	1.95	1.87
2	56	4	1	2	0	0	0	105	65	86	21.79	86	0	0	4.68	52.5	3.61	2.75	1.33	0.76	1.99	1.99
1	53	4	1	2	0	0	0	115	75	90	24.84	79	0	0	5.27	53.5	4.09	2.75	1.48	0.95	1.71	1.8
2	46	3	1	2	0	0	0	115	75	102	32.89	70	0	0	4.38	40.2	3.94	2.75	1.64	0.82	1.92	1.93
1	50	4	1	2	0	0	0	115	75	101	30.47	84	0	0	4.91	62.1	7	2.75	1.71	0.87	1.83	1.88
2	63	5	1	2	1	0	0	140	85	92	23.19	80	0	0	4.8	47	2.08	2.75	2.41	0.88	1.71	1.87
1	84	6	1	2	1	0	0	145	85	86	21.07	50	0	0	4.35	49.7	6.99	2.76	0.34	0.88	2.25	1.88
1	66	5	2	3	0	0	0	95	65	78	21.91	68	1	0	4.84	61.9	5.67	2.76	0.41	1.04	1.68	1.72
1	52	4	1	2	1	0	0	115	75	78	24.77	71	0	0	3.92	54.7	4.72	2.76	0.56	1.04	1.96	1.72
1	66	5	1	2	1	0	0	135	85	98	26.72	110	0	0	8.84	62.9	7.09	2.76	0.68	0.91	2.12	1.85
2	49	3	2	2	1	0	0	115	85	79	23.56	79	0	0	4.49	29.6	5.23	2.76	0.74	0.88	1.79	1.88
1	56	4	1	2	0	0	0	115	65	80	23.05	74	0	0	4.38	69	4.76	2.76	0.79	0.92	1.97	1.84
2	47	3	2	2	0	0	0	105	65	90	27.99	85	0	0	4.21	33.8	4.12	2.76	0.8	0.93	2.03	1.83
2	51	4	1	2	1	0	0	135	70	70	21.36	60	0	0	4.53	39.8	4.22	2.76	0.81	1.04	1.62	1.72
2	67	5	2	2	1	0	0	145	85	89	28.25	76	0	0	6.17	68	4.69	2.76	0.91	1.01	1.45	1.75
1	62	5	1	2	0	0	0	105	75	97	27.59	78	0	0	5.18	54.1	7.04	2.76	1.08	0.83	2.53	1.93
2	67	5	1	2	1	0	0	135	85	110	28.38	84	0	0	6.11	49.5	4.56	2.76	1.1	0.95	1.77	1.81
2	66	5	1	2	1	0	0	115	75	90	24.24	99	0	0	4.11	49.3	6.02	2.76	1.17	0.9	2.02	1.86
2	62	5	1	2	0	0	0	125	80	87	25.78	62	0	0	4.64	53.3	2.83	2.76	1.35	0.95	1.9	1.81
1	54	4	1	2	1	1	0	105	65	86	27.34	65	0	0	3.9	65.4	4.91	2.76	1.67	0.96	1.9	1.8
1	50	4	1	2	1	0	0	115	85	90	25.65	81	0	0	4.63	57.8	3.76	2.76	1.72	0.89	2.26	1.87
1	66	5	1	2	1	0	0	125	85	85	20.08	78	0	0	6.06	58.2	5.02	2.76	2.23	0.78	2.03	1.98
2	48	3	2	2	0	0	0	120	65	86	23.15	71	0	0	4.08	40.6	2.63	2.76	2.69	0.98	1.78	1.78
2	51	4	1	2	0	0	0	115	70	76	24.22	84	0	0	4.07	74.4	5.19	2.77	0.32	0.97	1.99	1.8
1	48	3	1	2	0	0	0	115	75	85	23.8	75	1	0	4.69	42.2	4.69	2.77	0.41	0.91	2.13	1.86
2	52	4	1	2	1	0	0	125	75	90	20.5	64	0	0	4.74	61.4	5.13	2.77	0.41	1.24	1.35	1.53
2	59	4	1	2	1	0	0	145	95	78	19.63	76	0	0	4.33	45.2	4	2.77	0.48	1.12	1.69	1.65
2	70	6	1	3	1	0	0	95	60	70	19.98	93	0	0	4.89	35.1	5.03	2.77	0.6	1.04	1.67	1.73
2	54	4	1	2	0	0	0	105	75	77	20.69	71	0	0	4.57	48.5	5.84	2.77	0.65	0.9	1.87	1.87
2	58	4	1	2	0	0	0	110	65	80	19.31	94	0	0	4.89	52.8	4.64	2.77	0.7	0.98	2	1.79
2	47	3	1	2	0	0	0	105	75	86	28.15	78	0	0	4.81	38.6	4.97	2.77	0.74	0.95	2.1	1.82
1	47	3	1	2	0	0	0	105	75	77	23.83	65	0	0	4.85	49.5	4.19	2.77	0.75	1.07	1.71	1.7
2	48	3	2	2	1	0	0	125	85	83	24.84	84	0	0	5.3	34.5	3.76	2.77	0.86	0.83	2.23	1.94
2	47	3	1	2	1	0	0	130	75	97	32.27	90	0	0	4.65	57.7	5.17	2.77	0.87	1.07	1.73	1.7
1	48	3	1	2	0	0	0	105	65	111	34.84	89	0	0	4.79	51.4	4.31	2.77	0.87	0.91	2	1.86
2	19	1	1	1	0	0	0	115	75	68	20.96	74	0	0	4.72	60.8	2.58	2.77	0.88	0.91	1.98	1.86
2	95	6	1	3	0	0	0	115	65	80	23.98	78	0	0	6.97	43.6	7.35	2.77	0.9	0.98	1.8	1.79
2	53	4	1	2	0	0	0	115	75	99	27.59	103	0	0	3.98	36.5	3.16	2.77	1.02	0.93	2.13	1.84
2	53	4	1	2	0	0	0	105	65	81	26.22	77	0	0	4.41	42.3	3.37	2.77	1.03	0.99	1.92	1.78
2	50	4	1	2	1	0	0	125	85	96	29.69	64	0	0	4.15	55.6	3.86	2.77	1.06	1.02	2.04	1.75
2	65	5	1	2	1	0	0	115	85	76	19.31	80	0	0	4.26	43.8	3.81	2.77	1.3	0.9	2.09	1.87
1	68	5	2	2	1	0	0	125	90	106	29.74	72	0	0	4.25	76.8	3.9	2.77	1.65	0.82	2.12	1.95
2	47	3	1	2	0	0	0	105	65	108	39.04	83	0	0	4.5	43.2	2.34	2.77	1.92	0.79	2.24	1.98
1	67	5	1	2	0	0	0	95	65	92	25.4	63	0	0	3.94	55.1	6.41	2.78	0.6	0.91	2.1	1.87
2	54	4	1	2	1	0	0	100	65	92	25.2	90	0	0	4.29	40.3	4.26	2.78	0.62	1.12	1.54	1.66
1	53	4	1	2	1	0	0	110	75	88	26.9	75	0	0	4.44	49	5.3	2.78	0.7	0.86	2.33	1.92
2	67	5	1	2	0	0	0	115	75	78	17.9	85	0	0	4.87	34.3	6.05	2.78	0.73	0.94	1.81	1.84
2	49	3	1	2	0	0	0	95	60	80	26.44	66	0	0	5.25	54.8	3.92	2.78	0.76	1.08	1.64	1.7
1	76	6	1	2	1	0	0	125	75	101	26.12	72	0	0	4.86	66.5	4.27	2.78	0.76	0.98	1.89	1.8
1	57	4	1	2	1	0	0	125	90	95	26.35	63	0	0	3.97	58.5	6.76	2.78	0.77	0.96	2.08	1.82
2	53	4	1	2	1	0	0	125	85	90	28.4	80	0	0	4.28	46.8	2.87	2.78	0.79	0.92	2.15	1.86
2	52	4	1	2	1	0	0	115	85	108	32.86	73	0	0	4.65	52.8	4.25	2.78	0.89	1.02	1.84	1.76
1	57	4	1	2	0	0	0	125	75	98	28.58	82	0	0	6.89	67	4.77	2.78	0.98	1.85	2.1	0.93
1	48	3	1	2	0	0	0	105	60	84	25.22	55	1	1	4.37	67	5.57	2.78	1.03	0.99	1.78	1.79
1	59	4	1	2	0	0	0	95	55	90	23.92	100	0	0	5.22	62.9	4.73	2.78	1.12	0.84	2.01	1.94
2	66	5	1	2	0	0	0	110	80	86	18.02	88	0	0	5.02	77.8	3.56	2.78	1.19	0.86	1.96	1.92
2	48	3	1	2	0	0	0	110	65	84	24.88	85	0	0	5.35	41.7	3.77	2.78	1.21	0.88	2.07	1.9
1	68	5	1	2	0	0	0	95	65	82	23.53	83	0	0	5.6	61.1	7.39	2.78	1.25	0.87	2.08	1.91
2	48	3	1	2	0	0	0	95	60	75	21.08	70	0	0	4.51	43.1	4.82	2.78	1.33	0.81	1.88	1.97
2	52	4	1	2	1	0	0	145	75	101	27.93	76	0	0	5.95	38.9	5.3	2.78	1.39	0.99	1.78	1.79
2	47	3	1	2	0	0	0	110	65	93	32.04	75	0	0	4.22	35.6	3.6	2.78	1.53	0.85	1.95	1.93
2	58	4	1	2	1	0	0	130	80	93	29.05	96	0	0	4.83	60.7	5.62	2.78	2.08	0.82	1.99	1.96
1	74	6	1	2	0	0	0	120	65	90	19.78	76	0	0	5.76	53.6	4.94	2.79	0.45	0.99	2.01	1.8
2	23	1	2	1	0	0	0	95	60	72	22.68	69	0	0	4.83	43.5	2.24	2.79	0.47	0.87	2.13	1.92
1	74	6	1	2	1	0	0	140	85	76	21.23	75	0	0	4.04	46.5	3.99	2.79	0.5	0.98	1.96	1.81
2	61	5	1	2	0	0	0	95	60	70	18.43	85	0	0	4.43	36.4	3.99	2.79	0.6	1.06	1.63	1.73
2	83	6	1	3	1	0	1	140	75	73	22.63	75	0	0	4.75	43.2	6.67	2.79	0.65	1.05	1.69	1.74
1	66	5	1	2	1	0	0	105	65	82	23.74	67	0	0	5.56	47	4.2	2.79	0.67	0.99	1.87	1.8
1	84	6	2	2	1	0	0	105	65	95	24.61	75	0	0	5.13	57.9	5.43	2.79	0.68	0.86	2.16	1.93
1	69	5	1	2	0	0	0	125	75	90	21.08	53	0	0	3.62	64.3	4.3	2.79	0.71	1.1	1.6	1.69
2	79	6	1	2	1	1	0	145	90	86	20.64	79	0	0	4.11	53.8	4.28	2.79	0.71	0.94	2.04	1.85
1	60	5	1	2	0	0	0	115	75	92	25.65	89	0	0	5.19	44	3.08	2.79	0.75	0.82	2.25	1.97
2	48	3	1	2	0	0	0	125	75	64	16.22	87	0	0	4.73	51.1	3.21	2.79	0.76	1.08	1.58	1.71
2	57	4	1	2	0	0	0	95	65	72	21.45	83	0	0	4.45	45.7	3.46	2.79	0.77	0.98	1.82	1.81
2	50	4	1	2	0	0	0	95	60	75	20.89	64	0	0	4.2	15.2	6.2	2.79	0.8	1.3	1.1	1.49
1	61	5	1	2	1	0	0	125	85	90	25.56	69	0	0	4.77	67.4	4.69	2.79	0.8	1	1.89	1.79
1	66	5	1	2	0	0	0	95	60	88	19.07	78	1	0	4.29	61.6	5.57	2.79	0.81	0.81	2.08	1.98
1	52	4	2	2	0	0	0	115	75	81	26.95	81	0	0	4.2	74.8	4.58	2.79	0.83	0.91	1.78	1.88
1	60	5	1	2	1	0	0	105	55	70	23.46	74	0	0	4.88	43.4	6.11	2.79	0.87	0.96	1.96	1.83
1	73	6	2	2	1	0	0	125	80	71	20.32	67	1	0	4.75	64.2	5.65	2.79	0.98	0.98	1.29	1.81
2	51	4	1	2	1	0	0	140	75	84	22.81	74	0	0	5.7	56.4	4.05	2.79	1.03	0.91	2.06	1.88
1	75	6	1	3	0	0	0	105	65	100	23.12	72	0	0	4.88	59.9	4.53	2.79	1.14	1.09	1.34	1.7
2	48	3	1	2	0	0	0	105	75	96	30.8	79	0	0	4.54	61.1	2.87	2.79	1.24	0.92	2.25	1.87
2	55	4	1	2	1	0	1	140	80	87	24	81	0	0	9.09	44.6	5.64	2.79	1.3	0.84	1.89	1.95
1	48	3	1	2	1	0	0	135	95	109	34.37	80	0	0	5.32	74.6	5.2	2.79	1.58	0.9	1.92	1.89
1	46	3	2	2	0	0	0	115	75	82	23.88	87	0	0	4.46	41.2	2.93	2.79	1.74	0.83	2.14	1.96
2	51	4	1	2	0	0	0	95	65	102	30.86	80	0	0	4.58	58.3	6.57	1.8	0.2	0.3	0.5	1.5
2	54	4	1	2	1	0	0	120	65	78	26.48	80	0	0	4.53	47.9	3.55	2.8	0.36	1.09	1.68	1.71
2	55	4	1	2	0	0	0	105	75	108	34.58	79	0	0	4.5	58.3	3.13	2.8	0.4	2.1	2.5	0.7
1	74	6	1	2	1	0	0	120	75	65	19.14	61	0	0	4.34	64.4	5.42	2.8	0.42	0.97	2.04	1.83
1	47	3	1	2	0	0	0	115	65	83	26.03	80	0	0	4.39	67.9	3.81	2.8	0.62	0.93	2.01	1.87
1	46	3	1	2	0	0	0	115	65	76	22.31	84	0	0	4.39	47.9	5.13	2.8	0.63	1.03	1.95	1.77
1	62	5	1	2	0	0	0	115	75	98	29.38	85	0	0	4.13	66.9	4.73	2.8	0.65	1.01	1.79	1.79
1	57	4	1	2	0	0	0	95	55	81	21.41	78	1	0	4.15	53.7	3.77	2.8	0.7	1.8	2.7	1
1	49	3	1	2	0	0	0	115	65	89	27.29	84	0	0	4.47	55.9	5.57	2.8	0.77	0.91	2.1	1.89
1	58	4	1	2	0	0	0	100	60	92	21.14	64	0	0	4.46	66.1	5.42	2.8	0.78	1.05	1.92	1.75
1	56	4	1	2	1	0	0	125	85	83	22.41	85	0	0	5.42	55.8	5.39	2.8	0.79	1.16	1.44	1.64
2	19	1	2	1	0	0	0	110	75	72	21.94	86	0	0	4.42	41.2	4.79	2.8	0.86	0.89	1.89	1.91
1	66	5	1	2	1	0	0	140	95	105	27.01	81	0	0	5.26	53.6	5.18	2.8	0.88	0.95	1.96	1.85
1	53	4	1	2	0	0	0	105	65	86	23.15	71	1	1	5.07	51.8	4.65	2.8	0.93	0.88	1.95	1.92
2	50	4	1	2	1	1	0	115	65	102	29.82	71	0	0	5.61	60.5	4.58	2.8	0.96	0.87	1.99	1.93
1	63	5	1	2	0	0	0	115	65	97	25.46	83	0	0	6.29	51.5	4.54	2.8	0.97	0.94	2.04	1.86
2	59	4	1	2	1	0	0	105	80	70	17.71	89	0	0	5.54	40.3	3.56	2.8	1.1	0.99	1.93	1.81
2	55	4	1	2	0	0	0	115	75	111	37.57	88	0	0	4.34	47.3	5.13	2.8	1.23	1.03	1.63	1.77
1	49	3	1	2	0	0	0	115	75	104	29.41	79	0	0	4.53	63.6	5.11	2.8	1.24	0.87	2.01	1.93
1	47	3	1	2	0	0	0	95	60	97	24.45	84	1	1	4.15	74.6	4.06	2.8	1.43	0.78	1.96	2.02
1	55	4	1	2	0	0	0	115	75	104	29.41	64	0	0	4.57	61.8	4.45	2.8	1.57	0.83	2.16	1.97
2	48	3	1	2	1	0	0	135	70	78	24.44	60	0	0	4.86	50.9	3.36	2.8	1.82	1.1	1.59	1.7
2	53	4	1	2	0	0	0	105	70	98	28.62	88	0	0	8.24	53.5	3.89	2.8	1.87	0.98	1.86	1.82
2	50	4	2	2	0	1	0	105	70	91	27.28	78	0	0	4.41	56.4	3.25	2.8	2.01	0.87	2.01	1.93
1	65	5	1	3	1	0	0	145	75	84	23.87	74	0	0	4.95	51.7	4.18	2.8	2.17	0.83	2.04	1.97
1	49	3	2	2	1	0	0	130	75	85	24.15	92	1	0	4.25	67.9	3.61	2.8	2.7	0.85	2.02	1.95
1	64	5	1	2	1	0	0	115	65	99	23.6	87	0	0	9.22	17.6	4.24	2.8	4.5	2.3	1.3	0.5
2	52	4	3	2	0	0	0	110	70	91	29.3	80	0	0	4.55	46.7	3.6	1.81	0.07	0.85	0.57	0.96
1	59	4	1	2	0	0	0	105	65	75	19.38	68	1	0	4.03	43.8	4.82	2.81	0.63	1.18	1.63	1.63
2	48	3	1	2	0	0	0	105	75	95	28.3	80	0	0	4.02	52.5	3.42	2.81	0.64	0.89	2.15	1.92
1	68	5	2	2	0	0	0	115	75	89	23.53	74	0	0	4.58	55.7	6.09	2.81	0.66	1.04	1.75	1.77
2	53	4	1	2	0	0	0	125	75	70	20.55	60	0	0	4.84	47.1	4.3	2.81	0.79	1.03	1.92	1.78
1	80	6	1	2	0	0	0	80	65	94	23.44	68	0	0	4.53	54.9	5.37	2.81	0.83	0.99	2	1.82
2	57	4	1	2	1	0	0	120	75	92	31.64	88	0	0	4.33	66.3	4.66	2.81	0.99	1.03	1.77	1.78
1	52	4	1	2	1	0	0	115	75	101	25.51	83	1	1	14.84	47.5	4.46	2.81	1.04	0.86	2.17	1.95
1	56	4	1	2	1	0	0	130	70	90	27.34	82	0	0	4.77	37.8	4.56	2.81	1.08	0.8	2.12	2.01
1	59	4	1	2	0	0	0	115	75	87	22.66	80	0	0	5.77	61	5.56	2.81	1.18	0.81	2.07	2
2	69	5	1	2	1	0	1	130	85	91	25.68	88	0	0	17.86	72.4	3.16	2.81	1.19	0.87	1.76	1.94
1	74	6	1	2	1	0	0	115	70	96	24.56	63	0	0	4.75	51.3	5.6	2.81	1.3	0.87	1.68	1.94
2	53	4	3	2	1	0	0	95	75	80	25.46	80	0	0	4.8	13	7.15	2.81	1.81	0.86	2.39	1.95
1	54	4	1	2	0	0	0	95	65	86	24.22	68	0	0	4.4	63.1	4.78	2.81	5.03	1.07	1.85	1.74
1	70	6	2	2	1	0	0	145	95	105	24.21	66	0	0	4.67	67.2	5.19	2.82	0.45	0.97	1.94	1.85
2	71	6	1	2	1	1	0	135	85	102	26.22	85	0	0	7.14	50.6	6.09	2.82	0.58	1.04	1.86	1.78
1	73	6	1	2	1	0	0	115	75	103	34.38	85	0	0	8.39	55.6	7.02	2.82	0.75	0.95	1.87	1.87
1	60	5	1	2	0	0	0	125	75	84	26.17	62	1	0	4.19	68.1	4.84	2.82	0.83	1.04	1.8	1.78
1	55	4	1	2	0	0	0	115	75	83	22.86	89	0	0	3.96	62.8	3.7	2.82	0.84	1.09	1.58	1.73
1	70	6	1	3	1	0	0	105	60	76	20.06	62	0	0	4.54	47.5	7.05	2.82	0.9	0.96	2.01	1.86
1	75	6	1	2	1	0	0	110	80	85	25.24	75	0	0	5.24	66.8	3.39	2.82	0.92	0.91	2.02	1.91
2	61	5	1	3	1	0	0	135	75	79	24.46	84	0	0	4.78	60.5	5.15	2.82	0.96	1.04	1.79	1.78
1	75	6	1	2	1	0	1	135	80	112	29.38	89	0	0	7.81	93.4	4.35	2.82	1.3	0.87	2.27	1.95
2	51	4	1	2	0	0	0	95	65	84	25.78	78	0	0	5.1	52	5.83	2.82	1.32	0.9	2.05	1.92
2	63	5	1	2	0	0	0	95	65	114	30.08	78	0	0	5.8	52.1	4.12	2.82	1.37	0.86	2.2	1.96
2	58	4	1	2	0	0	0	95	65	56	22.37	75	0	0	4.31	37.9	4.09	2.82	1.38	0.88	2.14	1.94
1	63	5	1	2	0	0	0	105	55	75	22.95	76	0	0	4.57	71.9	4.4	2.82	1.7	1.06	1.38	1.76
1	68	5	1	2	1	0	0	115	85	94	23.44	73	0	0	4.97	51.5	3.58	2.83	0.52	1.01	1.87	1.82
1	62	5	1	2	0	0	0	115	75	75	21.23	84	0	0	4.49	53.9	7.16	2.83	0.56	1	1.89	1.83
2	22	1	2	1	0	0	0	110	65	66	20.43	82	0	0	4.76	34.6	2.96	2.83	0.59	0.88	2.17	1.95
1	75	6	1	2	1	0	0	95	60	80	25.72	67	0	0	3.92	80.3	5.91	2.83	0.61	1.12	1.69	1.71
2	71	6	1	2	0	0	0	105	65	82	25.15	71	0	0	4.45	54	3.74	2.83	0.72	0.89	2.18	1.94
2	57	4	1	2	0	0	0	100	60	65	19.05	72	0	0	4.38	52.8	6.69	2.83	0.72	0.95	2.15	1.88
2	50	4	1	2	0	0	0	95	65	80	23.5	86	0	0	4.67	53	3.9	2.83	0.74	1.11	1.68	1.72
2	47	3	2	2	1	0	0	135	95	77	22.94	83	0	0	4.85	87.1	4.87	2.83	0.91	1.06	1.77	1.77
2	51	4	1	2	0	0	0	95	65	82	21.91	89	0	0	4.53	50.5	3.31	2.83	1.05	0.97	1.9	1.86
1	65	5	1	2	1	0	0	115	85	63	22.59	79	0	0	4.83	86.1	4.25	2.83	1.07	1.01	1.87	1.82
1	83	6	1	2	1	0	0	125	80	106	26.67	100	0	0	4.21	73.3	3.76	2.83	1.18	0.8	2.08	2.03
2	64	5	1	3	1	0	0	135	95	97	42.88	76	0	0	5.64	57.7	4.97	2.83	1.28	0.92	1.9	1.91
2	51	4	2	2	0	0	0	125	75	80	26.41	77	0	0	4.85	48.6	3.42	2.83	1.28	0.94	1.77	1.89
2	54	4	1	2	1	0	0	125	85	88	24.14	89	0	0	4.73	60	5.4	2.83	1.3	0.93	1.59	1.9
2	46	3	1	2	0	0	0	95	65	89	27.63	78	0	0	5.75	39.5	6.45	2.83	1.32	1.02	1.78	1.81
2	52	4	1	2	1	0	0	125	80	82	31.08	74	0	0	4.34	43.8	4.42	2.83	1.4	0.87	2.33	1.96
2	58	4	1	2	1	0	0	140	75	94	27.47	91	0	0	4.4	46.1	4.55	2.83	2.25	0.8	2.1	2.03
1	66	5	1	2	0	0	0	115	70	94	22.84	82	1	0	4.26	55.8	5.43	2.84	0.47	1.07	1.59	1.77
2	57	4	1	2	1	0	0	125	80	90	23.56	80	0	0	4.56	51.1	6.3	2.84	0.53	1.1	1.75	1.74
1	51	4	1	2	0	0	0	105	65	87	22.23	77	0	0	4.77	58.7	6.45	2.84	0.55	0.92	2.07	1.92
1	51	4	1	2	0	0	0	105	65	80	20.45	76	0	0	4.21	51.9	4.52	2.84	0.65	0.95	2.01	1.89
2	54	4	1	2	0	0	0	115	75	91	25.71	80	0	0	4.19	37.7	2.57	2.84	0.68	1	2.02	1.84
1	69	5	1	2	1	0	0	155	90	77	22.48	60	0	0	4.84	61.1	4.54	2.84	0.68	1.12	1.72	1.72
1	48	3	2	2	0	0	0	115	75	75	19.71	79	0	0	4.38	46	5.05	2.84	0.69	1.03	1.95	1.81
1	63	5	1	2	0	0	0	125	80	77	22.1	87	0	0	4.29	50.7	4.8	2.84	0.72	1	2.15	1.84
2	52	4	1	2	0	0	0	105	75	88	24.59	69	0	0	4.33	51	5.19	2.84	0.76	0.89	2.26	1.95
2	55	4	1	2	1	0	0	125	85	75	22.6	87	0	0	4.7	34.4	7.17	2.84	0.79	0.95	1.79	1.89
1	76	6	1	2	1	0	0	125	95	89	25	77	0	0	4.59	46.2	6.5	2.84	0.8	1.03	2.02	1.81
1	50	4	1	2	0	0	0	110	65	80	21.45	79	0	0	4.57	81.2	4.26	2.84	0.87	0.98	1.84	1.86
1	59	4	1	3	0	0	0	115	80	88	22.23	85	1	1	4.36	76.3	3.74	2.84	0.95	0.82	2.2	2.02
1	47	3	1	2	0	0	0	115	75	90	25.16	80	1	1	4.42	43.7	4.33	2.84	0.97	0.82	2.2	2.02
1	49	3	1	2	1	0	0	140	75	92	25.15	98	0	0	5.16	68.2	4.99	2.84	0.98	0.91	2.07	1.93
2	71	6	1	2	1	0	0	135	70	116	31.64	80	0	0	4.88	54.1	4.04	2.84	0.98	1.14	1.31	1.7
1	55	4	1	2	0	0	0	115	75	81	20.69	60	0	0	4.28	48.2	5.3	2.84	0.99	1.06	1.64	1.78
1	79	6	1	2	1	0	0	165	80	90	23.51	108	0	0	3.93	47.2	4.36	2.84	1.05	0.91	2.12	1.93
1	58	4	1	2	1	0	0	125	85	92	32.04	64	0	0	4.18	65.5	4.06	2.84	1.11	0.88	2.24	1.96
2	65	5	1	2	1	0	0	125	85	96	23.62	68	0	0	7.23	51.3	4.48	2.84	1.15	0.95	1.93	1.89
2	68	5	1	2	0	0	0	105	75	86	19.11	76	0	0	4.84	49.1	4.15	2.84	1.2	1.07	1.67	1.77
2	60	5	1	2	1	0	0	140	90	103	24.92	80	0	0	4.77	53.5	6.01	2.84	1.22	1.79	2.11	1.05
1	74	6	1	2	1	0	0	125	85	87	23.88	92	0	0	6.21	56.6	5.45	2.84	1.52	0.93	1.83	1.91
1	74	6	1	2	1	0	0	155	90	91	26.64	64	0	0	3.93	63.3	4.63	2.84	2.13	0.98	1.51	1.86
1	55	4	1	2	0	0	0	105	75	89	28.04	76	0	0	5.54	66.1	3.6	2.84	3.15	0.84	2.03	2
2	51	4	2	2	1	0	0	130	85	98	34.19	83	0	0	4.08	44.9	3.09	2.84	3.38	0.84	1.72	2
2	49	3	1	2	1	0	0	125	85	104	31.63	82	0	0	4.61	53.4	2.79	2.85	0.49	1.11	1.93	1.74
1	54	4	1	2	0	0	0	95	60	84	25.86	65	0	0	4.29	68.2	5.3	2.85	0.51	0.88	2.13	1.97
2	58	4	1	2	1	0	0	145	95	73	21.37	76	0	0	4.36	34.1	3.59	2.85	0.55	1.14	1.58	1.71
1	53	4	2	2	0	0	0	105	65	87	24.61	64	0	0	4.66	57.7	4.45	2.85	0.8	0.93	2.16	1.92
2	60	5	1	2	0	0	0	105	65	74	22.07	74	0	0	4.65	63.2	5.11	2.85	0.89	1.02	1.97	1.83
1	81	6	1	2	0	0	0	115	75	85	21.78	80	0	0	5.06	57.1	6.86	2.85	0.91	0.95	2.04	1.9
2	61	5	1	2	1	0	0	135	85	96	30.18	71	0	0	4.26	41.6	4.2	2.85	0.99	0.84	2.11	2.01
2	74	6	1	2	1	0	0	140	95	123	31.25	68	0	0	5.47	61.4	5.42	2.85	1.12	0.9	2.05	1.95
1	59	4	1	2	1	0	0	155	95	98	28.13	90	0	0	4.61	71.2	5.11	2.85	1.13	0.92	2.08	1.93
2	52	4	1	2	0	0	0	115	75	83	24.24	80	0	0	4.11	54.1	4.37	2.85	1.23	0.83	2.27	2.02
1	54	4	1	2	1	0	0	125	85	84	24.42	83	0	0	4.62	79.9	4.01	2.85	1.53	0.91	2.2	1.94
2	60	5	1	2	1	0	0	130	85	89	25.67	76	0	0	4.26	47	3.25	2.85	1.64	1	1.81	1.85
1	58	4	1	2	0	0	1	115	75	92	26.57	76	0	0	12.85	58.8	3.94	2.85	1.67	0.8	2.22	2.05
1	51	4	1	2	1	0	0	115	75	97	31.23	68	0	0	4.84	57.7	3.12	2.85	2.46	0.83	2.08	2.02
1	53	4	1	2	0	0	0	95	60	88	26.08	80	0	0	4.97	56.4	8.32	2.85	2.59	0.8	1.95	2.05
1	48	3	2	2	0	0	0	115	75	96	26.35	67	0	0	4.67	66.8	3.76	2.86	0.48	0.92	2.14	1.94
2	53	4	1	2	0	0	1	85	60	99	30.02	76	0	0	4.82	44.1	8.53	2.86	0.55	0.9	1.91	1.96
2	58	4	1	2	0	0	0	100	65	73	19.17	81	0	0	4.6	54.7	3.85	2.86	0.55	1.17	1.63	1.69
2	80	6	1	3	1	0	0	125	80	76	29.59	108	0	0	4.92	53.6	3.63	2.86	0.57	1.16	1.66	1.7
1	69	5	1	2	1	0	0	135	70	82	21.36	60	0	0	4.22	80	6.89	2.86	0.6	0.97	1.54	1.89
2	50	4	1	2	1	0	0	140	95	92	25.32	78	0	0	4.95	72.3	6.22	2.86	0.8	0.92	2.06	1.94
2	63	5	1	3	1	0	0	145	85	80	21.87	80	0	0	4.78	45.2	2.59	2.86	0.8	1.02	2.05	1.84
2	50	4	1	2	1	0	0	135	85	86	26.14	73	0	0	4.46	50.3	4.86	2.86	0.81	0.95	2.1	1.91
2	51	4	1	2	0	0	0	105	60	84	22.77	80	0	0	4.53	59.8	4.48	2.86	0.83	0.93	1.82	1.93
1	78	6	1	2	0	0	0	115	75	92	33.78	79	0	0	5.79	195.4	10.67	2.86	0.89	0.9	2.1	1.96
1	67	5	1	2	1	0	0	105	65	80	20.03	71	0	0	5.27	44.2	4.12	2.86	0.9	0.85	2.16	2.01
1	48	3	1	3	1	0	0	115	85	105	29.41	81	0	0	4.26	57.7	5.26	2.86	0.94	0.95	1.84	1.91
1	50	4	1	2	1	0	0	155	90	92	23.62	71	0	0	5.38	54.3	3.77	2.86	0.95	1.15	1.3	1.71
2	66	5	1	2	1	0	0	135	85	98	25.89	80	0	0	4.66	47.5	4.19	2.86	0.96	1.09	1.77	1.77
2	50	4	1	2	1	0	0	115	85	88	23.73	84	0	0	5.05	40.8	5.07	2.86	0.98	0.87	1.91	1.99
2	50	4	1	2	0	0	0	95	65	75	16.94	80	0	0	6.11	61.5	3.64	2.86	1	1.25	0.26	1.61
2	49	3	1	2	0	0	0	95	65	89	24.67	80	0	0	4.27	34	4.42	2.86	1.01	0.96	2	1.9
1	64	5	1	2	1	0	0	145	85	94	20.57	75	0	0	3.98	48.3	4.14	2.86	1.12	0.83	2.18	2.03
1	56	4	1	2	1	1	0	140	90	110	30.45	80	0	0	4.11	72.2	4.08	2.86	1.53	0.86	2.21	2
2	61	5	3	2	1	0	0	135	85	90	21.8	87	0	0	4.17	59.7	3.17	2.86	2.31	1.09	1.13	1.77
2	28	1	3	2	0	0	0	110	70	60	18.75	76	0	0	4.84	30.9	3.95	2.87	0.19	0.98	1.88	1.89
1	54	4	1	2	1	0	0	115	75	107	32.01	62	0	0	4.55	56.7	3.83	2.87	0.31	1.01	2.15	1.86
1	55	4	1	3	0	0	0	100	65	81	22.58	70	0	0	4.68	57.9	4.75	2.87	0.47	0.97	1.93	1.9
2	65	5	1	3	1	0	0	145	95	103	29	89	0	0	4.13	49.6	5.67	2.87	0.71	1.05	1.99	1.82
1	47	3	1	2	0	0	0	115	75	80	23.83	76	0	0	4.05	53.2	3.96	2.87	0.74	0.87	2.21	2
1	65	5	1	2	0	0	0	115	75	96	24.34	66	0	0	5.92	25.2	5.21	1.87	0.79	0.9	0.21	0.97
1	60	5	1	2	1	0	0	125	75	90	25.53	70	0	0	3.82	69.5	5.59	2.87	0.81	0.9	2.01	1.97
1	58	4	1	3	1	0	0	125	85	90	20.31	72	0	0	4.58	59.1	4.63	2.87	0.9	0.94	2.12	1.93
1	71	6	1	2	0	0	0	115	70	97	26.3	80	0	0	4.36	56.9	5.16	2.87	0.93	0.89	1.95	1.98
2	48	3	2	2	0	0	0	105	75	95	31.47	74	0	0	4.89	47.7	3.32	2.87	0.94	0.82	2.16	2.05
1	53	4	1	2	0	0	0	85	55	79	25.2	76	0	0	5.28	59.5	5.66	2.87	0.94	1.14	1.48	1.73
1	73	6	2	2	1	0	0	140	90	92	25.08	80	0	0	4.79	62.7	5.1	2.87	0.97	0.86	2.33	2.01
2	66	5	1	3	0	0	0	105	75	89	23.37	76	0	0	4.28	35.3	3.12	2.87	1.05	0.95	2	1.92
1	55	4	2	2	0	0	0	115	75	88	21.5	69	0	0	6.63	52.8	5.99	2.87	1.08	0.99	2.03	1.88
1	51	4	1	2	1	0	1	125	90	99	28.41	81	0	0	11.02	55.1	4.7	2.87	1.1	0.93	2.12	1.94
2	63	5	1	2	1	0	0	135	95	102	29.09	62	0	0	4.66	51.4	3.67	2.87	1.21	1.02	1.51	1.85
2	52	4	1	3	1	0	0	115	65	90	25.88	78	0	0	4.75	36.8	3.12	2.87	1.27	0.99	1.98	1.88
2	53	4	1	2	1	0	0	120	70	101	29.15	69	0	0	4.07	40.8	3.65	2.87	1.45	0.97	2.15	1.9
2	69	5	1	3	1	0	0	120	90	75	18.81	86	0	0	3.96	34.6	3.13	2.87	1.46	0.96	2.04	1.91
2	62	5	1	2	0	0	0	90	60	89	30.96	66	0	0	4.76	51.8	6.51	2.87	1.97	0.97	1.53	1.9
2	57	4	1	2	1	0	0	135	85	109	30.76	81	0	0	4.14	43.4	2.96	2.87	3.14	0.79	1.77	2.08
1	50	4	1	2	0	0	0	110	75	94	28.28	75	0	0	5.76	68	3.9	2.87	3.4	0.68	2.02	2.19
1	53	4	3	2	0	0	0	100	65	92	22.77	73	1	0	5.09	90	4.81	2.87	4.16	0.79	1.38	2.08
2	53	4	1	2	0	0	0	95	65	92	25.15	72	0	0	4.88	75.4	5.09	2.87	4.83	0.65	1.89	2.22
2	49	3	1	2	0	0	0	110	65	90	28.23	70	0	0	4.04	32.2	4.09	2.88	0.26	0.89	2.43	1.99
1	58	4	3	2	0	0	0	115	75	106	32.79	80	0	0	4.24	56.3	6.02	2.88	0.68	0.8	2.43	2.08
1	68	5	1	2	1	0	0	115	75	94	26.78	85	0	0	4.51	54.3	4.02	2.88	0.68	0.96	2.29	1.92
1	55	4	1	2	0	0	0	125	80	89	28.63	84	0	0	5.06	71.6	4	2.88	0.76	0.94	2.15	1.94
1	53	4	1	2	0	0	0	115	75	81	24.39	74	0	0	4.33	58.1	3.93	2.88	0.87	0.97	1.96	1.91
2	69	5	1	3	1	0	0	135	90	82	17.1	88	0	0	4.67	57	4.5	2.88	0.87	0.96	2.04	1.92
2	48	3	1	2	0	0	0	95	65	93	27.51	80	0	0	4.14	51.9	3.73	2.88	0.91	1.01	2.03	1.87
2	89	6	1	3	1	0	0	120	75	78	21.63	82	0	0	4.86	38.8	3.1	2.88	1.02	1.11	1.57	1.77
1	57	4	1	2	0	0	0	105	65	82	21.28	62	1	0	4.46	65.9	7.63	2.88	1.02	1.03	1.83	1.85
1	85	6	1	2	0	0	0	115	75	100	25.5	76	0	0	5.84	69.2	3.49	2.88	1.03	0.86	2.34	2.02
1	53	4	2	2	1	0	0	125	85	106	30.12	78	0	0	4.08	64.7	5.06	2.88	1.04	0.96	2.11	1.92
1	73	6	1	2	1	0	0	125	90	105	25.61	87	0	0	4.58	60.9	7.45	2.88	1.05	0.87	2.2	2.01
2	58	4	1	2	1	0	0	135	95	82	20.45	84	0	0	4.68	53.5	5.28	2.88	1.15	1	1.56	1.88
2	50	4	2	2	1	0	0	115	75	89	22.77	76	0	0	5.52	51.6	5.32	2.88	1.24	1.1	1.7	1.78
2	47	3	1	2	1	0	0	130	80	71	22.1	80	0	0	5.09	50.4	3.42	2.88	1.24	0.99	1.83	1.89
1	52	4	1	2	1	0	0	125	85	92	24.98	91	1	0	4.62	58.4	4.74	2.88	1.27	0.92	2.18	1.96
1	66	5	1	2	1	0	0	135	75	70	23.83	93	0	0	4.87	66.7	3.97	2.88	1.31	0.98	1.87	1.9
2	57	4	1	2	1	0	0	135	85	105	25.56	82	0	0	5.74	52.1	2.64	2.88	1.32	0.9	2.04	1.98
2	51	4	2	2	1	0	0	150	85	88	29.17	88	0	0	4.89	45.2	3.91	2.88	1.44	0.95	2.1	1.93
2	49	3	1	2	0	0	0	105	65	82	22.35	76	0	0	5.29	50.1	3.93	2.88	1.49	0.89	1.92	1.99
1	60	5	2	2	1	0	1	155	95	104	29.39	66	0	0	10.38	83.3	5.62	2.88	1.71	0.81	2.34	2.07
1	55	4	1	2	1	0	0	125	75	105	31.21	84	0	0	3.98	56.2	4.91	2.88	2.68	0.75	1.96	2.13
1	62	5	1	2	0	0	0	110	65	83	23.87	61	0	0	4.14	59.7	3.98	2.89	0.27	0.99	2.06	1.9
2	50	4	1	2	1	0	0	115	75	76	22.48	64	0	0	4.77	49.8	3.39	2.89	0.39	1.16	1.63	1.73
2	74	6	1	3	0	0	0	105	70	78	17.44	84	0	0	4.88	54.4	6.25	2.89	0.55	0.93	2.04	1.96
1	67	5	1	2	0	0	0	105	65	93	22.5	72	0	0	4.52	72.3	5.51	2.89	0.63	0.96	1.89	1.93
2	69	5	1	2	1	0	0	170	95	94	25.8	80	0	0	5.86	44.8	9.58	2.89	0.75	1.6	2.8	1.29
2	58	4	2	2	0	0	0	110	65	82	25.81	62	0	0	4.51	51.2	5.53	2.89	0.76	0.99	2.01	1.9
2	47	3	1	2	0	0	0	95	65	88	26.75	89	0	0	3.6	44.1	4.34	2.89	0.78	1.04	1.95	1.85
1	65	5	1	2	1	1	0	115	85	97	26.17	70	0	0	4.23	52.2	4.65	2.89	0.81	0.96	2.12	1.93
2	62	5	1	2	1	0	0	115	65	79	24.77	68	0	0	4.56	72	4.57	2.89	0.84	1.33	1.06	1.56
1	81	6	1	2	1	0	0	115	75	170	29.3	92	0	0	4.01	52.8	5.03	2.89	0.89	0.92	2.26	1.97
2	46	3	1	2	0	0	0	125	75	90	27.59	87	0	0	3.98	39.9	2.83	2.89	1	0.98	2	1.91
2	66	5	1	3	0	0	0	110	65	100	26.62	71	0	0	4.53	61.8	4.28	2.89	1.02	0.95	1.94	1.94
2	58	4	1	2	1	0	0	110	65	87	27.43	84	0	0	4.32	45.1	3.27	2.89	1.07	0.94	2.16	1.95
2	61	5	1	2	1	0	0	135	90	92	24.94	79	0	0	4.54	52.7	4.29	2.89	1.08	1.05	1.94	1.84
1	72	6	1	2	1	0	0	115	75	104	27.05	84	0	0	4.8	71.6	6.45	2.89	1.09	0.84	2.27	2.05
2	48	3	1	2	0	0	0	100	65	76	19.22	70	0	0	4.72	41.1	3.77	2.89	1.09	0.97	1.91	1.92
1	65	5	1	2	1	1	0	125	80	106	33.15	84	0	0	5.83	86.4	4.99	2.89	1.17	0.84	2.11	2.05
2	53	4	1	2	0	0	0	115	75	94	28.57	71	0	0	5.29	49.3	2.74	2.89	1.17	0.9	2.27	1.99
2	63	5	1	2	0	0	0	100	60	96	29.78	70	0	0	4.67	55.8	4.47	2.89	1.2	0.87	2.23	2.02
1	60	5	1	2	1	0	0	115	85	102	31.16	49	0	0	4.86	108	4.87	2.89	1.23	1.15	2.22	1.74
2	52	4	1	2	1	0	0	115	85	86	28.35	88	0	0	4.7	40.7	3.94	2.89	1.26	0.96	1.93	1.93
1	47	3	1	2	0	0	0	95	60	89	25.91	65	0	0	4.36	54.2	4.28	2.89	1.38	0.92	2.1	1.97
2	57	4	1	2	0	1	0	100	65	93	29.28	64	0	0	4.82	51	2.6	2.89	1.39	0.98	1.83	1.91
1	51	4	2	2	0	0	0	105	70	96	26.08	68	0	0	4.61	61.5	5.21	2.89	1.77	0.93	2.2	1.96
1	46	3	1	2	0	0	0	105	65	110	31.51	78	0	0	4.78	50.5	4.51	2.89	1.98	0.84	1.73	2.05
1	52	4	1	2	1	0	0	140	80	81	25.16	89	1	0	4.39	54.8	3.17	2.89	2.06	0.87	2.06	2.02
2	57	4	1	2	0	0	0	105	75	93	31.64	75	0	0	3.94	52	3.32	2.89	2.14	0.83	2.09	2.06
2	48	3	1	2	1	1	0	115	85	83	24.17	78	0	0	5.07	51.8	4.52	2.89	2.17	0.79	2.22	2.1
1	45	3	2	2	0	0	0	105	65	85	26.56	66	0	0	4.63	53.8	5.52	2.9	0.39	0.93	1.8	1.97
2	72	6	1	2	1	1	1	120	80	94	28.84	95	0	0	8.17	51.8	3.14	2.9	0.46	0.87	2.3	2.03
1	60	5	1	2	0	0	0	89.5	72	80	20.28	78	0	0	5.9	76	7.02	2.9	0.63	1.26	1.47	1.64
1	66	5	1	2	0	0	0	115	75	81	22.81	80	0	0	4.18	69.4	4.23	2.9	0.65	0.89	2.24	2.01
1	71	6	1	2	0	0	0	90	55	82	22.1	75	0	0	4	50.9	3.91	2.9	0.66	0.99	2.17	1.91
1	56	4	1	2	1	0	0	125	85	90	26.17	80	0	0	4.55	25.6	3.5	2.9	0.7	1	1.2	1.9
2	51	4	1	2	0	0	0	115	75	92	24.39	85	0	0	4.31	31.2	5.55	2.9	0.7	0.9	2.16	2
2	54	4	1	2	0	0	0	125	75	92	23.34	80	0	0	4.54	55.4	5.03	2.9	0.71	0.97	2.15	1.93
2	60	5	1	2	0	0	0	110	65	105	32.89	79	0	0	4.88	50.8	3.99	2.9	0.79	0.93	1.9	1.97
2	52	4	1	2	0	0	0	120	65	84	26.58	77	0	0	4.24	42.6	4.72	2.9	0.8	0.96	2.17	1.94
2	67	5	1	2	1	0	0	145	95	90	23.53	86	0	0	4.53	42.8	3.34	2.9	0.85	0.84	2.29	2.06
1	50	4	2	2	1	0	0	125	85	94	37.81	84	0	0	4.56	53.6	3.72	2.9	0.87	0.9	2.22	2
2	53	4	1	2	0	0	0	115	65	88	27.47	80	0	0	4.23	41.5	6.2	2.9	0.88	1	1.14	1.9
1	77	6	1	2	1	0	0	160	85	96	21.78	85	0	0	5.56	69.4	7.2	2.9	0.89	0.88	2.34	2.02
1	49	3	2	2	0	0	0	115	75	85	24.34	72	0	0	4.58	59.3	4.2	2.9	0.9	0.98	2.1	1.92
1	84	6	1	3	0	0	0	105	65	84	21.93	84	0	0	4.93	55	5.89	2.9	0.92	0.86	2.09	2.04
1	69	5	1	2	1	0	0	125	75	88	25.07	72	0	0	3.91	43.3	3.37	2.9	0.97	0.8	2.52	2.1
2	58	4	1	2	1	0	0	120	70	82	19.5	77	0	0	4.93	46.8	5.91	2.9	0.99	1	1.94	1.9
1	69	5	1	2	1	0	0	125	75	104	32.03	71	0	0	4.89	88.3	5.1	2.9	1	1.02	2.04	1.88
1	66	5	1	2	0	0	0	105	65	88	28.62	69	0	0	5.78	47.8	4.67	2.9	1.01	0.93	1.9	1.97
2	55	4	2	2	0	0	0	115	75	95	26.9	78	0	0	5.84	50.2	3.99	2.9	1.03	0.98	2	1.92
2	47	3	1	2	0	0	0	110	75	85	26.56	62	0	0	4.05	55.3	2.26	2.9	1.05	0.96	2.06	1.94
2	44	3	1	2	1	0	0	155	90	92	29.17	88	0	0	5.6	41.5	4.2	2.9	1.1	1.2	1	1.7
2	46	3	1	2	1	0	0	125	85	104	29.41	78	0	0	5.42	43.8	2.11	2.9	1.21	0.94	2.04	1.96
1	59	4	1	2	0	0	0	115	70	102	31.23	71	0	0	4.31	78.4	1.59	2.9	1.25	0.86	2.13	2.04
2	79	6	1	2	1	0	0	105	65	100	28.76	90	0	0	13.81	40.8	4.17	2.9	1.25	0.9	2.2	2
2	49	3	1	2	0	0	0	95	60	88	25.81	51	0	0	4.84	31.6	4.59	2.9	1.3	0.85	2.18	2.05
1	58	4	2	2	0	0	0	115	65	90	27.29	80	0	0	4.92	87	6.3	2.9	1.41	1.1	1.3	1.8
2	64	5	1	2	0	0	0	105	65	73	21.79	84	0	0	5.23	41.5	2.6	2.9	1.5	2	1.1	0.9
1	51	4	1	2	0	0	0	105	65	94	31.62	78	0	0	4.33	57.5	4	2.9	1.5	1.85	2	1.05
2	53	4	1	2	0	0	0	125	80	99	33.27	88	0	0	5.64	46.3	4.43	2.9	1.52	0.96	1.97	1.94
2	53	4	1	2	0	0	0	105	65	65	22.83	80	0	0	4.3	47.5	4.89	2.9	1.66	1.03	1.91	1.87
1	54	4	2	2	0	0	1	95	60	75	20.55	84	0	0	4.33	41.5	5.36	2.9	2.5	0.98	1.6	1.92
2	70	6	1	2	1	0	0	125	75	95	28.55	74	0	0	5.03	40.5	4.21	2.9	4.71	0.85	1.94	2.05
2	50	4	1	2	0	0	0	95	65	80	23.87	78	0	0	4.13	44.9	2.67	2.9	4.93	0.93	2.17	1.97
1	56	4	1	2	1	0	0	95	65	92	27.39	80	0	0	4.36	68.6	3.55	2.91	0.45	0.98	1.99	1.93
1	63	5	2	3	0	0	0	105	65	76	22.67	88	0	0	4.76	50.5	4.54	2.91	0.48	0.92	2.22	1.99
1	56	4	1	2	0	0	0	115	75	96	26.57	80	0	0	4.34	55.6	14.7	2.91	0.7	0.9	2.29	2.01
2	51	4	1	2	0	0	0	115	75	72	18.97	84	0	0	4.45	31.8	4.02	2.91	0.79	1.03	1.73	1.88
1	68	5	1	2	0	0	0	125	75	93	23.45	98	0	0	5.19	54.4	6.47	2.91	0.81	0.99	2.03	1.92
1	72	6	1	2	1	0	0	125	75	82	22.83	84	1	0	4.6	67.8	6.63	2.91	0.82	0.92	2.24	1.99
2	57	4	1	2	1	0	0	115	85	80	26.31	79	0	0	4.8	57.5	4.36	2.91	0.83	1.01	2.08	1.9
2	47	3	1	2	0	0	0	105	65	75	20.72	72	0	0	4.77	35.2	5.71	2.91	0.84	1.09	1.64	1.82
2	50	4	1	2	1	0	0	135	90	68	28.23	80	0	0	4.7	47.9	3.74	2.91	0.92	0.99	1.89	1.92
1	50	4	1	2	1	0	0	125	75	86	24.98	80	0	0	4.43	58.5	3.59	2.91	0.97	0.95	2.09	1.96
2	63	5	1	2	0	0	0	95	60	72	19.22	70	0	0	3.96	48.1	4.68	2.91	1.11	1.03	1.82	1.88
1	58	4	1	2	1	0	0	105	65	83	24.13	70	0	0	4.25	55.7	4.21	2.91	1.13	1.05	1.87	1.86
1	70	6	2	2	0	0	0	115	75	110	30.86	69	0	0	5.06	73.5	3.46	2.91	1.21	0.84	2.12	2.07
1	63	5	1	2	1	0	0	135	70	106	24.09	69	0	0	4.06	54.3	4.31	2.91	1.25	0.88	2.09	2.03
1	49	3	1	2	0	0	0	100	55	78	22.21	74	1	0	4.79	64.7	5.52	2.91	1.25	0.97	2.1	1.94
1	77	6	1	2	1	0	0	125	80	89	31.12	90	0	0	9.25	65.2	5.57	2.91	1.37	0.76	2.29	2.15
2	55	4	1	3	1	0	1	135	85	106	32.83	74	0	0	4.34	56.7	4.65	2.91	1.49	0.93	2.08	1.98
2	53	4	1	2	1	0	0	105	85	71	35.19	71	0	0	4.69	41.4	3.33	2.91	1.69	0.8	1.99	2.11
2	46	3	1	2	0	0	0	105	75	112	35.03	78	0	0	4.61	30.1	2.55	2.91	1.72	0.87	2.09	2.04
1	58	4	1	2	0	0	0	100	65	96	26.5	78	0	0	6.1	59.7	6.19	2.91	1.78	0.86	2.22	2.05
1	47	3	2	2	0	0	0	105	75	107	31.25	95	0	0	7.16	75.4	6.27	2.91	1.79	0.74	2.2	2.17
2	61	5	1	2	0	0	0	85	60	92	19.98	79	0	0	5.06	57.6	5.82	2.91	4.21	1.05	1.66	1.86
2	66	5	1	2	1	0	0	125	65	70	19.3	83	0	0	6.9	44.6	4.79	2.92	0.58	1.11	1.77	1.81
2	47	3	1	2	0	0	0	125	75	90	26.27	78	0	0	5.96	58.8	3.45	2.92	0.58	1.02	2.03	1.9
1	61	5	1	2	0	0	0	115	75	75	21.51	81	0	0	3.96	59	5.24	2.92	0.59	1.04	2.04	1.88
1	49	3	1	2	0	0	0	115	75	80	28.2	64	0	0	4.28	52.9	4.62	2.92	0.62	1.07	1.8	1.85
1	75	6	1	2	1	0	0	125	90	82	22.76	71	0	0	5.31	69.2	4.96	2.92	0.63	0.94	2.15	1.98
2	48	3	2	2	0	0	0	85	60	103	28.31	68	0	0	4.34	57.5	3.43	2.92	0.77	1.01	1.93	1.91
1	61	5	1	2	0	0	0	105	70	82	23.26	72	0	0	6.21	81.1	11.08	2.92	0.94	0.93	2.35	1.99
1	74	6	1	2	1	0	0	125	85	99	27.68	62	0	0	4.44	62.1	7.62	2.92	0.96	0.96	1.93	1.96
2	53	4	1	2	0	0	0	110	75	89	22.77	90	0	0	4.8	34.7	3.59	2.92	0.97	0.96	2.04	1.96
1	57	4	1	2	0	0	0	125	75	82	25.15	74	0	0	4.33	52.7	4.46	2.92	0.98	0.95	2.2	1.97
1	51	4	1	2	0	0	0	100	65	85	23.05	64	0	0	4.04	54.4	4.52	2.92	1.02	0.95	2.12	1.97
2	70	6	1	2	1	0	0	115	85	82	23.61	71	0	0	4.81	38.6	4.66	2.92	1.11	0.92	2.1	2
2	56	4	2	2	1	0	0	130	80	94	24.89	84	0	0	7.24	43.4	3.9	2.92	1.17	0.92	2.04	2
2	52	4	2	3	0	0	0	130	75	72	19.91	91	0	0	4.15	48.3	4.21	2.92	1.17	1.04	1.75	1.88
1	68	5	1	2	0	0	0	115	75	79	19.23	82	0	0	5.89	105.1	4.74	2.92	1.23	0.92	1.86	2
2	53	4	1	2	1	0	0	140	70	94	26.44	67	0	0	4.8	47.8	4.9	2.92	1.74	1.01	1.74	1.91
1	65	5	1	2	1	0	0	125	85	94	26.35	80	0	0	6.44	53.8	6.14	2.92	2.54	0.76	2.26	2.16
1	48	3	2	2	0	0	0	115	75	94	26.18	87	0	0	4.49	70.7	4.01	2.92	3.5	0.69	2.15	2.23
1	53	4	1	2	0	0	0	125	75	83	23.51	83	0	0	4.33	60.7	5.3	2.92	3.56	0.95	2.2	1.97
2	51	4	1	2	0	0	0	100	65	95	34.55	69	0	0	5.08	29.9	2.66	2.92	3.85	0.7	1.95	2.22
1	57	4	1	2	1	0	1	105	65	115	32.35	82	0	0	7.55	83.2	3.91	2.92	3.9	0.69	2.11	2.23
2	59	4	1	2	0	0	0	115	70	94	30.48	72	0	0	7.78	48.3	2.78	2.92	4.4	0.68	1.79	2.24
1	67	5	1	2	0	0	0	115	75	95	25.15	74	0	0	4.55	51.3	2.56	2.93	0.31	0.96	2.16	1.97
2	50	4	1	2	1	0	0	150	90	93	29.37	73	0	0	4.65	67.2	3.89	2.93	0.42	0.94	2.29	1.99
2	51	4	1	2	0	0	0	105	65	75	20.55	68	0	0	4.46	38.3	2.4	2.93	0.51	0.98	2.05	1.95
1	73	6	1	2	1	0	0	105	60	93	27.12	77	0	0	4.8	28	3.68	2.93	0.56	0.98	2.03	1.95
1	72	6	1	2	1	0	0	135	75	73	21.64	75	0	0	4.92	55.9	7.93	2.93	0.57	1	1.94	1.93
2	47	3	2	2	0	0	0	95	65	88	24.03	82	0	0	3.97	37.5	7.88	2.93	0.61	0.97	2.16	1.96
2	52	4	2	2	0	0	0	105	65	83	21.63	75	0	0	4.59	46.8	4.46	2.93	0.72	1.05	1.93	1.88
1	77	6	1	2	1	0	0	125	85	85	19.37	72	0	0	4.56	72.1	5.39	2.93	0.78	1.03	1.65	1.9
2	51	4	2	2	0	1	0	100	65	106	31.11	82	0	0	5.68	44	6.34	2.93	0.82	0.87	2.17	2.06
1	53	4	1	2	0	0	0	115	75	65	19.63	66	0	0	4.9	52.1	4.78	2.93	0.87	1.1	1.85	1.83
2	58	4	1	2	1	0	0	125	85	101	32.76	77	0	0	6.31	36.5	4.98	2.93	0.9	0.82	2.32	2.11
2	56	4	1	2	0	0	0	115	75	104	26.99	76	0	0	5.1	45.3	3.53	2.93	0.94	0.82	2.15	2.11
2	46	3	1	2	0	0	0	95	65	94	29.24	87	0	0	4.12	43.2	3.78	2.93	0.94	1.02	1.97	1.91
1	77	6	1	2	0	0	0	75	45	82	20.69	74	0	0	5.17	72.2	8.41	2.93	1.03	0.81	2.48	2.12
1	52	4	1	2	0	0	0	95	60	92	24.62	78	1	0	4.43	73.1	3.02	2.93	1.1	0.98	1.96	1.95
1	79	6	2	3	0	1	0	120	65	85	26.37	87	0	0	4.7	79.9	6.16	2.93	1.17	0.97	2.04	1.96
2	76	6	1	2	1	0	0	135	75	78	21.4	96	0	0	4.77	46.7	3.84	2.93	1.19	0.97	2.25	1.96
1	60	5	1	2	0	0	0	120	75	96	25.97	82	0	0	6.53	64.8	5.02	2.93	1.29	0.98	1.91	1.95
2	51	4	1	2	1	0	0	115	85	102	29.82	63	0	0	4.71	42.6	5.31	2.93	1.41	0.99	2.02	1.94
1	66	5	1	2	1	0	0	125	90	109	31.07	86	0	0	5.66	68.6	3.4	2.93	1.42	0.94	2.13	1.99
2	60	5	1	2	1	0	0	125	85	100	19.25	73	0	0	4.38	49.5	4.51	2.93	1.45	0.85	2.33	2.08
2	69	5	1	2	1	0	0	130	85	85	21.79	84	0	0	4.7	44.7	5.04	2.93	1.48	0.92	1.91	2.01
2	60	5	1	2	1	0	0	115	75	84	24.61	78	0	0	5	43.7	3.73	2.93	2.04	0.89	2.13	2.04
2	53	4	2	2	1	1	0	125	65	94	25.8	82	0	0	4.84	22	3.31	2.94	0.24	1.04	1.98	1.9
1	49	3	1	2	1	0	0	120	65	87	20.57	72	0	0	4.33	46.3	6.01	2.94	0.25	0.99	2.38	1.95
2	47	3	1	2	0	1	0	85	55	68	20.31	80	0	0	6.14	50.4	4.21	2.94	0.49	1.15	1.78	1.79
2	54	4	1	2	1	0	0	145	95	90	29.34	89	0	0	4.77	50.4	4.3	2.94	0.56	1.02	2.09	1.92
1	47	3	2	2	0	0	0	115	75	80	25.76	63	0	0	4.5	59.2	7.29	2.94	0.73	1.04	1.94	1.9
1	54	4	2	2	0	0	0	95	60	90	24.09	54	1	1	4.29	78	6.69	2.94	0.77	0.97	1.58	1.97
1	52	4	1	2	0	0	0	95	65	70	20.28	65	0	0	4.54	46.7	4.76	2.94	0.79	1.03	2	1.91
2	56	4	1	2	0	0	0	120	75	80	24.24	80	0	0	4.4	47.3	5.26	2.94	0.93	1	1.96	1.94
1	48	3	1	2	1	0	1	125	85	115	18.5	81	1	0	4.87	76.8	5.77	2.94	0.94	0.92	2.24	2.02
2	63	5	1	2	0	0	0	105	65	84	20.89	76	0	0	4.81	46.5	3.89	2.94	0.94	0.92	2.14	2.02
2	65	5	1	2	1	0	0	145	95	110	32.87	75	0	0	4.19	57.6	3.1	2.94	0.94	0.99	2.06	1.95
1	50	4	1	3	0	0	0	115	70	83	24.24	67	1	1	4.26	81.4	2.86	2.94	0.95	0.87	1.25	2.07
1	57	4	2	2	0	0	0	115	75	107	28.09	84	0	0	4.5	73	4.13	2.94	0.95	0.99	1.93	1.95
1	73	6	1	2	1	0	0	125	85	85	22.15	91	0	0	4.11	64.6	6.25	2.94	0.97	0.86	2.19	2.08
2	50	4	1	2	1	0	0	145	95	102	30.78	84	0	0	4.3	48.9	3.12	2.94	0.97	1	2.2	1.94
1	60	5	1	2	0	0	0	115	75	75	23.93	68	0	0	3.9	60.5	5.35	2.94	0.99	0.96	2.17	1.98
1	61	5	1	2	1	0	0	125	95	78	21.5	71	0	0	4.13	51.6	4.04	2.94	1.04	0.9	2.31	2.04
1	58	4	1	2	1	0	0	125	95	105	29.76	74	0	0	4.16	69.7	4.04	2.94	1.07	0.87	2.49	2.07
1	49	3	1	2	0	0	0	100	65	85	28.98	58	0	0	3.93	63.9	3.68	2.94	1.16	0.79	2.28	2.15
1	76	6	1	2	0	0	0	115	75	81	22.03	80	0	0	5.72	50.3	5.49	2.94	1.22	0.86	2.06	2.08
2	47	3	1	2	0	0	0	115	75	98	29.86	71	0	0	6.32	40	3.86	2.94	1.31	0.97	2.1	1.97
1	68	5	1	2	0	0	0	95	70	90	24.69	76	0	0	4.31	50.5	4.15	2.94	1.46	0.99	2	1.95
2	52	4	3	2	1	0	0	135	85	82	24.65	81	0	0	4.43	48.7	3.68	2.94	1.47	0.91	1.96	2.03
2	49	3	1	2	1	0	0	135	95	112	38.52	78	0	0	5.22	58	3.58	2.94	1.52	0.85	2.25	2.09
2	53	4	1	2	0	0	0	95	65	90	26.62	85	0	0	4.13	45.4	4.01	2.94	2.35	0.81	2.37	2.13
2	63	5	1	2	0	0	0	105	65	90	24.77	68	0	0	5.22	35.3	6.23	2.94	4.43	0.97	1.95	1.97
2	54	4	1	2	1	0	0	155	90	82	26.12	79	0	0	4.34	10.8	3.62	2.95	0.1	0.93	2.1	2.02
2	49	3	1	2	0	0	0	115	75	94	27.01	76	0	0	4.05	39	2.95	2.95	0.64	0.93	2.02	2.02
2	66	5	1	2	1	0	0	155	95	94	24.92	76	0	0	4.54	35.5	2.77	2.95	0.66	0.95	2.02	2
2	48	3	1	2	0	0	0	95	65	78	25.46	77	0	0	4.63	57	4.07	2.95	0.72	1.05	2.03	1.9
1	75	6	1	3	0	0	0	115	65	90	23.59	63	0	0	4.11	49.6	3.18	2.95	0.75	0.91	2.2	2.04
1	81	6	2	2	1	0	0	120	85	82	20.57	74	0	0	4.41	51.4	5.34	2.95	0.76	0.92	2.29	2.03
1	70	6	1	2	0	0	0	132.5	70	73	20.03	65	0	0	4.53	46.4	4.57	2.95	0.77	1.03	1.91	1.92
1	54	4	1	2	0	0	0	110	75	81	23.03	100	0	0	4.1	63.7	3.52	2.95	0.84	1.05	1.93	1.9
2	58	4	1	3	1	0	0	125	85	82	24.39	79	0	0	4.36	45.5	2.47	2.95	0.85	1.13	1.73	1.82
2	73	6	1	2	1	0	0	125	85	84	20.28	69	0	0	4.19	72.5	4.97	2.95	0.92	1.04	1.85	1.91
2	50	4	1	2	1	0	0	105	85	88	20.89	71	0	0	4.31	46.6	3.23	2.95	0.94	1	1.92	1.95
1	51	4	2	3	1	0	0	115	75	105	32.3	89	0	0	6.14	56.5	5.9	2.95	0.95	0.97	2.26	1.98
2	54	4	1	2	0	0	0	100	60	78	21	74	0	0	4.68	49	4.67	2.95	0.97	0.97	2.1	1.98
2	65	5	1	2	1	0	0	125	85	101	30.67	84	0	0	4.44	48.3	4.36	2.95	1	0.87	2.2	2.08
1	56	4	1	2	1	0	0	130	95	96	24.45	86	0	0	4.35	68.5	5.41	2.95	1	0.91	2.28	2.04
2	48	3	1	2	1	0	0	120	75	88	29.43	87	0	0	4.76	39.9	3.82	2.95	1.01	1.07	1.84	1.88
2	63	5	1	2	1	0	0	140	85	103	29.86	79	0	0	4.57	58.1	3.25	2.95	1.03	0.88	2.13	2.07
2	48	3	1	2	0	0	0	125	75	90	27.56	84	0	0	4.06	49.2	2.27	2.95	1.05	0.97	2.12	1.98
2	63	5	1	2	1	0	0	120	80	95	26.3	92	0	0	22.04	29.4	3.69	2.95	1.11	0.96	1.91	1.99
1	50	4	1	2	0	0	0	115	80	87	26.84	78	1	1	4.06	55.2	3.81	2.95	1.16	0.88	2.19	2.07
1	51	4	1	2	0	0	0	95	65	83	20.9	86	0	0	4.81	49.3	4.49	2.95	1.17	0.95	1.91	2
2	50	4	2	2	0	0	0	95	65	97	28.58	86	0	0	3.97	44	4.73	2.95	1.18	0.82	2.28	2.13
2	70	6	1	2	1	0	0	135	85	77	22.81	80	0	0	4.86	56.6	4.85	2.95	1.22	0.98	1.85	1.97
2	47	3	1	3	0	0	0	100	65	78	17.63	89	0	0	4.92	50.6	4.95	2.95	1.25	0.9	2.25	2.05
2	59	4	1	2	0	0	0	120	75	92	27.03	70	0	0	3.99	55.5	2.67	2.95	1.3	0.8	2.39	2.15
1	71	6	2	2	0	0	0	115	65	105	22.57	68	0	0	4.41	64.2	5.32	2.95	1.37	0.77	2.14	2.18
2	70	6	1	2	0	0	0	115	75	100	26.22	78	0	0	5.15	53.1	4.8	2.95	1.4	0.96	2.02	1.99
2	47	3	1	2	0	0	0	95	65	90	30.48	74	0	0	4.82	50	3.07	2.95	1.61	0.9	2.24	2.05
2	63	5	1	2	0	0	0	110	65	88	23.11	64	0	0	4.35	76	6.59	2.95	1.67	1.97	2.58	0.98
1	49	3	1	2	0	0	0	115	75	95	33.46	63	1	0	4.85	61.8	3.42	2.95	1.71	0.86	2.15	2.09
1	56	4	2	2	1	0	0	95	65	93	28.08	74	0	0	4.31	68.3	4.81	2.95	1.83	0.84	2.11	2.11
1	57	4	1	2	1	0	0	125	85	102	30.81	87	0	0	14.77	68	4.1	2.95	1.88	0.76	2.5	2.19
2	65	5	1	2	0	0	0	115	65	76	22.48	84	0	0	4.56	35.2	3.12	2.96	0.47	0.98	2.02	1.98
2	56	4	1	2	1	0	0	135	85	84	23.31	84	0	0	5.42	43	4.58	2.96	0.68	1.2	1.51	1.76
1	81	6	1	3	0	0	1	115	75	100	24.77	86	0	0	7.73	46.5	3.43	2.96	0.68	0.76	2.54	2.2
2	54	4	1	2	0	0	0	115	75	85	25.39	84	0	0	4.5	54.7	3.8	2.96	0.78	1.03	2.09	1.93
1	63	5	1	2	0	0	0	125	80	92	24.97	85	0	0	4.69	40.1	3.76	2.96	0.81	0.94	2.25	2.02
2	62	5	2	2	1	0	0	135	90	89	24.89	82	0	0	5.12	45.2	5.91	2.96	0.87	1.05	1.93	1.91
2	55	4	1	2	0	0	0	105	75	74	18.59	57	0	0	4.77	50.8	4.88	2.96	0.89	1.1	1.68	1.86
2	74	6	1	2	0	0	0	125	70	106	33.18	75	0	0	4.53	47.7	3.9	2.96	0.91	0.81	2.3	2.15
2	60	5	1	2	1	0	0	135	85	90	25.78	78	0	0	4.89	35.5	5.7	2.96	0.93	0.97	2.13	1.99
1	60	5	1	2	0	0	0	115	70	90	21.77	62	1	0	4.8	54	5.39	2.96	0.94	1.12	1.8	1.84
2	55	4	1	2	0	0	0	105	65	84	24.39	80	0	0	4.44	51.9	2.94	2.96	1.01	0.83	2.38	2.13
2	65	5	2	2	1	1	0	125	65	81	21.37	71	0	0	4.53	47.5	3.79	2.96	1.03	1.03	1.83	1.93
2	66	5	1	2	1	0	0	135	90	104	26.72	80	0	0	5.1	50	4.7	2.96	1.04	1.09	1.85	1.87
2	47	3	1	2	0	0	0	95	65	71	17.4	67	0	0	4.53	38.9	5.83	2.96	1.09	0.99	1.87	1.97
1	61	5	1	2	0	0	0	115	70	96	33.78	67	0	0	6.81	54.2	7.39	2.96	1.13	0.82	2.17	2.14
1	50	4	1	2	0	0	0	95	65	67	19.13	60	0	0	4.76	75	4	2.96	1.2	1.2	0.94	1.76
2	49	3	1	2	0	0	0	115	75	105	33.75	87	0	0	4.92	30.9	3.41	2.96	1.22	0.97	1.82	1.99
1	53	4	1	2	0	0	0	115	75	89	25.78	79	0	0	4.98	62.9	3.29	2.96	1.38	0.98	2.11	1.98
2	49	3	2	2	1	0	0	105	85	92	27.34	85	0	0	5.07	44.6	3.31	2.96	1.75	0.85	2.27	2.11
1	65	5	1	2	1	0	0	125	85	106	32.44	81	0	0	6.34	47.4	3.8	2.96	2	0.79	2	2.17
1	72	6	1	2	1	0	0	115	75	80	22.97	86	0	0	4.3	63.9	7.13	2.97	0.45	0.97	2.08	2
2	52	4	1	2	1	0	0	105	65	91	22.72	64	0	0	4.89	70.8	3.42	2.97	0.45	1.08	1.94	1.89
1	53	4	2	2	0	0	0	95	65	101	26.22	84	0	0	4.39	72	3.65	2.97	0.46	0.93	2.28	2.04
1	46	3	2	2	0	0	0	105	65	85	24.3	74	1	0	4.28	54.3	4.34	2.97	0.51	0.97	2.36	2
1	71	6	1	2	1	0	0	95	65	82	24.34	81	0	0	4.11	43.2	3.78	2.97	0.53	1	2.07	1.97
1	65	5	2	3	0	1	0	95	65	74	19.68	80	0	0	6.94	55.4	5.81	2.97	0.63	0.87	2.38	2.1
2	51	4	1	2	0	0	0	115	70	81	25.59	73	0	0	4.12	54.3	5.57	2.97	0.66	1.09	1.98	1.88
2	54	4	1	2	0	0	0	85	60	78	25.88	80	0	0	4.06	46.4	3.08	2.97	0.68	1.11	1.89	1.86
1	67	5	3	2	0	0	0	115	70	99	25.56	77	0	0	5.57	68.5	5.13	2.97	0.74	0.92	2.23	2.05
1	62	5	1	2	0	0	0	105	75	76	21.78	67	0	0	4.62	61.6	7.19	2.97	0.74	0.97	2.2	2
2	47	3	1	2	0	0	0	115	70	80	20.96	80	0	0	4.05	51.6	3.94	2.97	0.74	1.05	1.89	1.92
1	55	4	1	2	1	0	0	145	95	114	29.69	75	0	0	4.48	46.8	3.84	2.97	0.77	0.83	2.38	2.14
1	64	5	1	2	0	0	0	120	75	75	23.26	66	0	0	5.05	57.5	5.9	2.97	0.81	0.9	2.07	2.07
1	67	5	1	2	1	1	1	110	65	97	26.08	73	1	0	10.52	52.8	2.8	2.97	0.82	1.03	2.03	1.94
1	46	3	1	2	0	0	0	95	65	100	24.84	80	0	0	5.09	44	5.36	1.97	0.82	0.6	0.3	1.37
1	49	3	1	2	1	0	0	125	95	92	23.83	82	0	0	4.73	65.6	2.11	2.97	0.87	1.1	1.77	1.87
1	49	3	1	2	1	0	0	125	80	95	19.62	88	1	1	4.13	110.9	5.74	2.97	0.9	1.03	1.88	1.94
1	52	4	1	2	0	0	0	100	65	85	21.8	64	0	0	3.97	67.9	4.36	2.97	0.91	0.97	2.05	2
1	48	3	1	2	0	0	0	100	65	91	25.28	61	0	0	4.68	39.3	5.46	2.97	0.92	1.07	1.89	1.9
2	36	2	2	2	0	0	0	110	65	85	26.06	83	0	0	4.25	41.5	3.2	2.97	0.96	1	1.1	1.97
2	60	5	1	2	0	0	0	105	65	77	21.79	74	0	0	4.37	51.7	4.49	2.97	0.96	0.98	2.12	1.99
1	62	5	1	2	1	0	0	95	60	92	24.96	92	0	0	5.15	55.5	5.34	2.97	1.01	0.78	2.32	2.19
1	74	6	1	2	0	0	0	115	75	86	20.66	73	0	0	4.1	56	4.7	2.97	1.06	1.02	1.89	1.95
1	57	4	1	2	1	0	0	125	85	89	23.44	76	0	0	5.48	64.8	5.5	2.97	1.1	0.91	2.3	2.06
2	53	4	1	2	0	0	0	100	65	105	29.55	103	0	0	5.98	39.4	3.01	2.97	1.27	0.99	2.07	1.98
2	55	4	1	2	0	0	0	90	60	76	19.37	75	0	0	4.45	47.5	5.05	2.97	1.29	1.03	2.07	1.94
1	54	4	1	2	0	0	0	115	75	99	29.72	76	0	0	4.54	57.4	3.76	2.97	1.34	0.93	2.15	2.04
1	51	4	3	2	0	0	0	115	75	93	21.05	90	1	1	4.38	59.8	3.24	2.97	1.54	1.04	1.8	1.93
1	64	5	1	2	1	0	0	125	75	104	26.4	71	1	0	4.57	71.9	3.61	2.97	1.63	0.88	2.13	2.09
1	54	4	1	2	0	0	0	110	75	92	24.91	86	0	0	4.8	58.1	5.05	2.98	0.53	1.04	2.11	1.94
2	58	4	1	2	0	0	0	110	75	104	28	78	0	0	4.4	51.3	2.79	2.98	0.54	0.85	2.2	2.13
1	47	3	1	2	0	0	0	110	75	61	22.48	71	0	0	4.87	66.9	6.24	2.98	0.6	1.17	1.67	1.81
2	49	3	2	2	1	1	0	115	85	78	22.22	83	0	0	4.82	38	3.6	2.98	0.77	1.16	1.72	1.82
2	52	4	1	2	0	0	0	90	60	70	20.78	73	0	0	4.66	46.5	4.26	2.98	0.79	0.93	2.26	2.05
2	48	3	1	2	0	0	0	115	65	78	23.73	82	0	0	4	47.6	3.61	2.98	0.81	1.05	1.98	1.93
2	53	4	1	2	1	0	0	135	95	106	30.86	80	0	0	4.11	46.5	5.11	2.98	0.81	1.05	2.04	1.93
2	59	4	1	2	0	0	0	95	60	70	19.31	76	0	0	4.09	41.7	2.93	2.98	0.85	0.86	2.14	2.12
1	52	4	2	2	1	0	0	125	85	98	26.83	80	0	0	4.22	57.1	4.12	2.98	0.96	0.94	2.33	2.04
1	58	4	1	2	1	0	0	115	65	106	29.74	68	0	0	4.11	58.9	4.71	2.98	0.99	0.9	2.32	2.08
2	72	6	1	2	1	0	0	135	85	100	19.15	88	0	0	5.81	48.8	5.46	2.98	1.18	0.94	2.27	2.04
1	58	4	3	2	0	0	0	125	80	94	26.4	80	0	0	4.65	106	9.34	2.98	1.32	0.99	1.48	1.99
1	73	6	1	2	0	0	0	125	75	97	25.33	88	0	0	4.11	42.7	3.75	2.98	1.47	0.87	1.96	2.11
1	58	4	1	2	0	0	0	115	75	104	29.37	80	1	1	4.78	56.6	4.8	2.98	1.47	0.86	2.27	2.12
1	55	4	1	2	1	0	0	130	75	96	29.06	86	0	0	4.89	61.6	5.78	2.98	1.69	0.83	2.34	2.15
1	56	4	1	2	0	0	0	115	75	102	28.7	79	0	0	4.15	56.7	2	2.98	1.81	0.94	1.81	2.04
2	59	4	2	2	0	0	0	120	65	85	25.15	84	0	0	4.43	56.3	5.11	2.98	1.91	0.95	2.16	2.03
1	66	5	2	2	0	0	0	120	65	96	25.77	88	0	0	4.39	76.9	6.64	2.98	1.96	0.74	2.45	2.24
2	49	3	1	2	1	0	0	125	85	75	20.83	75	0	0	4.03	48.5	4.4	2.98	2.2	1	1.81	1.98
1	52	4	1	2	0	0	0	105	75	99	27.18	80	1	1	4.16	73.6	8.9	2.99	0.56	1.02	2.24	1.97
2	48	3	1	2	1	0	0	105	80	93	29.97	84	0	0	5.42	40.9	4.26	2.99	0.59	0.96	2.19	2.03
1	69	5	1	3	1	0	0	115	75	99	30.12	87	0	0	4.6	56.6	4.73	2.99	0.64	0.97	2.41	2.02
1	61	5	2	2	1	0	0	115	75	104	27.51	87	0	0	4.06	51.6	3.22	2.99	0.67	0.9	2.19	2.09
1	73	6	1	2	1	0	0	125	85	84	20.44	84	0	0	4.84	62.4	3.33	2.99	0.68	1.06	2.08	1.93
1	56	4	1	2	1	0	0	145	100	104	30.12	78	0	0	7.63	51.2	5.48	2.99	0.71	0.94	2.38	2.05
2	48	3	1	2	0	0	0	95	65	69	21.36	74	0	0	4.55	52.3	4.59	2.99	0.72	1.14	1.77	1.85
2	20	1	1	1	0	0	0	95	60	68	20.7	74	0	0	4.6	48.6	2.05	2.99	0.74	0.9	2.26	2.09
2	53	4	1	2	1	0	0	135	85	94	27.53	70	0	0	4.69	41.5	4.19	2.99	0.75	1.08	1.94	1.91
1	56	4	1	2	0	0	0	125	75	99	21.39	82	1	1	4.46	51.8	5.63	2.99	0.78	0.87	2.24	2.12
2	52	4	1	2	0	0	0	105	65	80	26.28	87	0	0	4.89	48.3	6.13	2.99	0.81	0.92	2.28	2.07
1	53	4	1	2	0	0	0	105	65	90	24.86	63	0	0	4.17	61.2	6.32	2.99	0.82	1.11	1.82	1.88
1	66	5	1	2	1	0	0	145	85	90	23.31	70	0	0	4.59	55.4	5.84	2.99	0.85	1	2.09	1.99
1	67	5	1	2	0	0	0	105	65	102	28.01	68	0	0	6.05	49.1	4.62	2.99	0.87	0.93	2.26	2.06
1	47	3	1	2	0	0	0	115	75	94	26.4	79	0	0	4.32	65.2	5.57	2.99	0.88	0.9	2.16	2.09
1	82	6	1	3	1	0	0	155	90	85	24.38	79	0	0	4.62	66.4	4.94	2.99	0.89	1	1.96	1.99
1	54	4	1	2	0	0	0	115	75	87	25.08	72	0	0	3.98	56.4	4.91	2.99	0.92	0.91	2.15	2.08
2	48	3	1	2	0	0	0	115	75	82	23.5	73	0	0	4.56	47.9	3.54	2.99	0.93	1.09	1.84	1.9
2	58	4	1	2	1	0	0	105	80	72	19.14	82	0	0	4.16	45.9	3.69	2.99	0.98	1.1	1.89	1.89
2	51	4	1	2	1	0	0	145	95	104	34.77	82	0	0	4.38	53.1	4.9	2.99	1.08	0.93	2.27	2.06
1	53	4	3	2	0	0	0	115	75	91	23.74	81	0	0	5.04	49.3	5.93	2.99	1.12	1	1.84	1.99
1	74	6	2	2	0	0	0	105	65	85	19.38	68	0	0	5.54	66.6	5.59	2.99	1.14	0.84	2.28	2.15
1	66	5	1	2	1	0	0	125	95	92	23.53	85	0	0	4.34	62.9	2.5	2.99	1.15	0.81	2.62	2.18
1	59	4	1	2	1	0	0	125	85	92	24.54	85	0	0	4.76	67.4	4	2.99	1.21	0.93	2.21	2.06
2	73	6	1	2	1	0	0	105	80	74	18.67	75	0	0	4.66	57.7	6.23	2.99	1.23	1.07	1.85	1.92
1	53	4	1	2	0	0	0	105	70	86	22.31	73	0	0	4.45	54.8	5.31	2.99	1.39	0.95	2.15	2.04
1	57	4	1	2	1	0	0	120	75	94	28.26	81	0	0	4.29	62.1	3.64	2.99	1.41	0.96	2.03	2.03
1	50	4	1	2	1	0	0	115	85	104	27.76	82	0	0	4.1	56	4.91	2.99	1.46	0.83	2.36	2.16
1	50	4	2	2	0	0	0	120	75	91	26.33	91	1	0	4.91	60.8	3.52	2.99	1.56	0.96	2.06	2.03
1	72	6	3	2	1	0	0	115	85	101	24.61	84	1	0	7.87	54.6	3.54	2.99	1.87	0.82	2.08	2.17
1	58	4	1	2	0	0	0	120	75	105	28.16	81	0	0	4.73	59	4.4	2.99	1.96	0.84	2.18	2.15
2	57	4	1	2	1	0	0	140	90	86	24.14	84	0	0	4.32	41.6	4.22	2.99	3.01	1.01	1.9	1.98
1	57	4	1	2	0	0	0	115	75	103	31.63	80	0	0	4.64	55	4.27	2.99	3.65	0.88	2.22	2.11
2	40	3	2	2	0	0	0	90	55	80	23.24	74	0	0	4.09	46.1	5	3	0.46	0.91	1.96	2.09
1	53	4	1	2	0	0	0	105	75	91	22.14	82	0	0	4.9	68.9	5.84	3	0.53	1.21	1.77	1.79
1	55	4	1	2	1	0	0	115	75	84	25.22	81	0	0	4.16	75.5	5.2	3	0.61	1.09	2.09	1.91
1	49	3	1	2	0	0	0	115	75	94	23.83	76	0	0	4.56	70	6.39	3	0.73	0.98	2.24	2.02
1	72	6	1	2	0	0	0	115	75	91	23.34	86	0	0	4.72	67.7	6.37	3	0.85	0.87	2.13	2.13
2	53	4	1	2	0	0	0	95	65	86	27.03	84	0	0	4.72	48.9	4.17	3	0.94	1.09	1.88	1.91
2	66	5	1	3	1	0	0	135	85	88	21.78	85	0	0	4.28	57.5	3.9	3	0.97	0.97	2.14	2.03
1	55	4	1	2	0	0	0	120	75	95	28.8	92	0	0	5.48	65.6	3.9	3	0.99	0.93	2.33	2.07
2	55	4	1	2	0	0	0	105	65	101	30.86	67	0	0	4.43	51	5.68	3	1.01	0.93	1.93	2.07
1	51	4	1	2	0	0	0	125	80	91	26.72	67	0	0	4.18	69.4	5.48	3	1.01	1.1	1.99	1.9
2	68	5	1	3	1	0	0	145	95	88	26.37	72	0	0	4.36	49.5	5.29	3	1.03	1	2.02	2
2	53	4	1	2	0	0	0	115	75	94	26.44	73	0	0	4.69	37.3	2.97	3	1.09	0.97	2.21	2.03
2	51	4	1	2	0	0	0	95	65	110	34.67	80	0	0	4.24	44.7	3.43	3	1.11	0.99	2.19	2.01
2	65	5	1	2	1	0	0	135	85	100	30.78	76	0	0	4.4	58.1	4.02	3	1.12	0.94	2.22	2.06
2	45	3	1	2	0	0	0	100	65	90	26.75	80	0	0	4.08	43.7	2.99	3	1.14	1.09	1.94	1.91
2	62	5	1	2	1	0	0	135	90	110	35.06	84	0	0	6.54	26.7	4.07	3	1.18	0.87	2.27	2.13
2	79	6	1	2	1	0	0	125	80	88	23.5	88	0	0	5.57	77	7.24	3	1.2	0.88	1.56	2.12
1	47	3	2	2	0	0	0	115	75	98	24.96	73	0	0	4.7	55.7	4.96	3	1.31	0.95	2.3	2.05
2	67	5	1	2	1	0	0	105	65	105	30.92	74	0	0	4.91	48.1	4.03	3	1.63	0.8	2.06	2.2
2	46	3	1	2	0	0	0	100	65	92	29.38	76	0	0	4.57	53.8	3.64	3	2	2	2.5	1
1	46	3	2	2	0	0	0	95	65	88	21.89	94	1	0	3.94	59.9	4.64	3	2	1.2	3	1.8
1	46	3	1	2	1	0	0	105	80	90	26.61	87	0	0	4.88	89	6.48	3	2	1.9	3	1.1
1	65	5	1	2	0	0	0	110	60	85	22.58	80	0	0	4.76	70	7.95	3	2.32	1.55	1.68	1.45
2	47	3	1	2	0	0	0	115	70	87	28.08	85	0	0	4.17	53.2	4.12	3	2.57	1.01	1.92	1.99
1	83	6	1	2	1	0	0	115	85	92	22.21	78	0	0	4.49	38.5	4.89	3.01	0.47	0.94	2.27	2.07
2	47	3	1	2	0	0	0	95	65	80	24.34	76	0	0	4.5	36.8	5.69	3.01	0.53	0.98	2.22	2.03
1	56	4	1	2	0	0	0	95	65	87	23.88	95	1	1	4.27	53.1	5.55	3.01	0.66	0.85	2.46	2.16
2	52	4	1	2	1	0	0	145	105	92	33.76	76	0	0	4.05	48.1	6.17	3.01	0.72	0.96	2.34	2.05
1	56	4	2	2	0	0	1	115	70	63	31.57	67	0	0	3.67	56.9	5.15	3.01	0.74	0.93	2.34	2.08
2	49	3	1	2	0	0	0	105	75	92	25.39	59	0	0	4.45	53.8	4.55	3.01	0.8	0.91	2.21	2.1
1	65	5	1	2	0	0	0	110	65	82	19.71	85	0	0	5.01	66.4	6.41	3.01	0.82	1.05	1.76	1.96
2	63	5	1	3	0	0	0	95	65	90	23.73	80	0	0	4.37	41.2	3.99	3.01	0.85	1.05	2	1.96
1	74	6	1	2	1	0	0	115	85	85	21.45	94	0	0	5.38	54.3	5.22	3.01	0.86	0.95	1.89	2.06
2	52	4	1	2	1	0	0	135	90	87	24.78	73	0	0	5.24	41.5	2.83	3.01	0.93	0.98	2.22	2.03
1	75	6	1	2	0	0	0	115	75	86	20.08	60	0	0	4.73	65.5	5.36	3.01	0.97	1.08	1.62	1.93
2	50	4	1	2	1	0	0	135	85	65	27.56	67	0	0	4.32	76	3.59	3.01	0.98	1	1.42	2.01
2	52	4	1	2	0	0	0	90	60	80	27.34	64	0	0	5.09	52.3	6.18	3.01	0.99	0.97	2.22	2.04
2	65	5	1	2	1	0	0	140	75	90	19.17	77	0	0	5.85	34.9	4.27	3.01	1.09	0.98	1.5	2.03
1	55	4	1	2	1	0	0	115	75	90	26.11	85	1	0	4.76	60.1	3.48	3.01	1.09	0.96	2.27	2.05
2	51	4	1	2	0	0	0	115	75	93	25.54	75	0	0	5.38	45.4	5.84	3.01	1.11	0.93	2.16	2.08
2	55	4	3	2	0	0	0	95	65	94	26.56	76	0	0	4.69	47.8	5.4	3.01	1.22	0.84	2.11	2.17
1	55	4	1	2	0	0	0	100	75	87	26.22	86	1	0	4.23	53.7	2.61	3.01	1.26	0.94	2.25	2.07
2	48	3	1	2	0	0	0	115	75	95	28.44	75	0	0	4.1	45.5	4.35	3.01	1.27	0.91	2.09	2.1
2	61	5	1	2	1	0	0	115	75	107	31.16	68	0	0	6.08	45.3	4.18	3.01	1.47	0.89	2.23	2.12
2	53	4	1	2	0	0	0	95	65	93	26.71	80	0	0	4.04	61.1	4.91	3.01	7.74	0.95	1.91	2.06
1	63	5	1	2	1	0	0	105	75	90	24.65	79	0	0	4.03	54.2	5.33	3.02	0.45	0.84	2.57	2.18
1	51	4	1	2	1	0	0	115	75	98	28.26	75	1	0	4.38	59.3	3.35	3.02	0.49	0.85	2.43	2.17
1	67	5	1	2	0	0	0	125	70	87	26.37	71	0	0	4.37	32.9	5.77	3.02	0.57	1.09	1.86	1.93
2	53	4	2	2	1	0	1	135	80	105	32.41	98	0	0	6	64.2	5.12	3.02	0.65	1.2	3.1	1.82
1	49	3	1	3	1	0	0	115	75	84	24.88	85	0	0	4.24	57.5	4.58	3.02	0.67	1.05	2.16	1.97
1	56	4	1	2	0	0	0	115	75	85	23.44	80	0	0	4.44	53.4	3.79	3.02	0.75	0.84	2	2.18
2	54	4	1	2	0	0	0	105	75	79	22.31	86	0	0	4.13	44	4.19	3.02	0.76	1.08	2.13	1.94
2	51	4	2	2	0	0	0	105	65	98	29.64	68	0	0	4.45	57	4.85	3.02	0.77	0.86	1.73	2.16
2	54	4	2	2	0	0	0	115	80	90	28.51	86	0	0	4.33	51.5	4.42	3.02	0.77	1.06	1.89	1.96
1	74	6	1	2	1	0	0	125	90	86	20.52	87	0	0	4.22	52.5	4.65	3.02	0.77	1.03	2.16	1.99
2	50	4	1	2	1	0	0	125	85	83	24.88	84	0	0	4.6	25.4	5.48	3.02	0.78	1.02	1.87	2
1	74	6	2	2	0	0	0	125	80	85	24	72	0	0	4.24	60.4	4.09	3.02	0.8	0.93	2.29	2.09
1	64	5	1	2	1	0	0	125	85	107	28.26	91	0	0	5.08	57.4	5.67	3.02	0.82	0.93	2.2	2.09
1	60	5	2	2	1	0	0	115	75	93	24.68	52	0	0	4.28	56.4	4.73	3.02	0.84	0.9	2.25	2.12
2	48	3	1	2	0	0	0	105	70	90	26.56	76	0	0	4.43	35.3	2.86	3.02	0.84	0.93	2.42	2.09
2	47	3	1	2	0	0	0	115	80	99	31.65	85	0	0	5.27	60.9	3.61	3.02	0.84	0.88	2.38	2.14
1	61	5	1	2	0	0	0	105	75	84	22.66	76	1	0	4.62	58.4	3.85	3.02	0.86	0.94	2.46	2.08
2	66	5	1	2	1	0	0	140	80	77	19.1	87	0	0	4.74	46.6	5.71	3.02	0.89	0.92	2.31	2.1
1	70	6	1	3	1	0	0	145	90	86	22.43	75	0	0	4.89	44.2	4.59	3.02	0.94	0.85	2.37	2.17
2	47	3	1	2	0	0	0	115	75	96	30.12	77	0	0	4.66	51.6	4.24	3.02	0.97	0.87	2.11	2.15
2	50	4	1	2	1	0	0	125	85	72	19.63	87	0	0	5.87	46.9	4.68	3.02	0.98	1.08	1.47	1.94
1	74	6	1	2	0	0	0	105	70	90	24.44	82	0	0	4.55	57.1	5.36	3.02	0.99	1.03	2.02	1.99
1	64	5	1	2	0	0	0	100	65	91	22.76	61	1	0	4.09	48.1	6.6	3.02	1.02	2.5	0.99	0.52
1	58	4	1	2	0	0	0	95	65	99	27.61	80	0	0	4.6	55.7	4.18	3.02	1.05	0.93	2.05	2.09
2	70	6	1	2	0	0	0	115	70	104	29.56	86	0	0	5.86	55.2	3.47	3.02	1.07	0.65	2.39	2.37
2	53	4	1	2	1	0	0	125	75	96	24.89	68	0	0	5.11	33.5	4.59	3.02	1.1	0.98	2.1	2.04
1	57	4	2	2	0	0	0	125	75	102	30.86	88	0	0	5.46	71.5	4.26	3.02	1.12	1	2.08	2.02
1	52	4	1	2	0	0	0	95	65	89	27.1	86	0	0	4.59	71.1	4.87	3.02	1.19	0.98	2.2	2.04
1	61	5	1	2	1	0	0	140	85	93	26.35	77	0	0	3.59	65.6	5.76	3.02	1.24	0.88	2.4	2.14
2	50	4	1	2	0	1	0	110	65	78	25.57	78	0	0	4.01	57.8	3.1	3.02	1.25	0.9	2.23	2.12
2	50	4	1	2	0	0	0	110	70	101	29	69	0	0	4.23	38.4	3.95	3.02	1.27	0.92	2.25	2.1
2	49	3	1	2	1	0	0	125	90	93	28.63	78	0	0	4.11	50.7	3.76	3.02	1.64	1.01	1.73	2.01
2	50	4	1	2	1	0	0	105	85	88	23.88	77	0	0	4.89	51.7	5.72	3.02	1.75	0.91	2.24	2.11
1	55	4	1	2	0	0	0	115	75	91	26.67	74	0	0	3.96	67.1	4.3	3.02	3.4	0.7	2.19	2.32
2	48	3	2	2	1	0	0	115	85	73	24.06	81	0	0	4.23	42.7	3.96	3.03	0.68	1.04	2.11	1.99
2	49	3	1	2	0	0	0	105	75	89	27.05	84	0	0	4.72	42.2	4.68	3.03	0.73	1.01	2.28	2.02
1	47	3	2	2	0	0	0	105	65	80	24.57	70	0	0	4.36	57.7	5.43	3.03	0.75	0.98	2.12	2.05
2	67	5	1	2	1	0	0	135	90	81	24.03	83	0	0	3.95	41.8	6.81	3.03	0.81	1.12	1.99	1.91
1	58	4	1	3	1	0	0	135	85	84	21.91	84	0	0	4.09	78	5.55	3.03	0.82	1.01	1.52	2.02
2	68	5	1	3	0	0	0	115	65	73	20.66	73	0	0	4.64	55.4	4.23	3.03	0.84	0.9	2.25	2.13
1	67	5	1	2	1	0	0	130	75	80	22.51	81	0	0	4.37	58.8	4.92	3.03	0.86	1.04	2.05	1.99
2	49	3	1	2	0	0	0	95	65	102	35.13	75	0	0	4.74	49.5	4.13	3.03	0.9	0.94	2.36	2.09
2	57	4	1	2	1	0	0	105	80	88	24.35	77	0	0	4.71	53.7	3.8	3.03	0.92	1.07	2.04	1.96
2	47	3	1	2	0	0	0	105	80	108	36.68	79	0	0	4.08	47	3.27	3.03	0.96	0.93	2.17	2.1
2	72	6	1	3	1	0	0	125	85	91	24.51	88	0	0	5.39	39.3	3.55	3.03	1.01	0.82	2.31	2.21
2	58	4	1	2	1	0	0	125	85	80	26.22	76	0	0	5.19	33.6	5.1	3.03	1.04	0.85	2.2	2.18
2	49	3	1	2	0	0	0	95	65	93	26.84	75	0	0	4.12	40.2	5.48	3.03	1.05	0.96	2.15	2.07
2	51	4	1	2	1	0	0	135	95	91	26.17	84	0	0	5.04	10	3.91	3.03	1.08	0.85	2.09	2.18
2	51	4	1	2	0	0	0	95	60	76	19.14	74	0	0	4.19	56.9	4.41	3.03	1.09	0.96	2.24	2.07
2	72	6	1	3	1	0	0	135	85	77	18.83	96	0	0	4.52	48.6	5.5	3.03	1.09	1.06	2.09	1.97
2	58	4	1	2	1	0	0	110	65	69	18.11	75	0	0	4.62	31	6.31	3.03	1.11	0.88	1.97	2.15
1	72	6	1	3	0	0	0	115	75	98	27.78	78	0	0	4.16	59.1	4.58	3.03	1.19	0.87	2.37	2.16
1	68	5	2	2	0	0	0	100	65	94	22.21	64	0	0	4.62	102.3	5.13	3.03	1.3	1.16	2.21	1.87
1	51	4	1	2	0	0	0	115	75	80	28.76	84	0	0	4.99	53.3	3.1	3.03	1.39	0.79	2.43	2.24
2	73	6	1	3	1	0	0	125	85	113	31.63	87	0	0	4.52	64.8	3.66	3.03	1.5	0.92	2.18	2.11
2	60	5	1	2	1	0	0	135	85	102	25.64	87	0	0	6.85	44.9	4.98	3.03	1.51	0.84	2.36	2.19
2	60	5	1	2	1	0	0	145	95	82	21.08	87	0	0	5.05	49.4	5.25	3.03	1.8	0.9	2.16	2.13
2	57	4	1	2	1	0	0	130	80	71	26.12	78	0	0	4.49	46	4.77	3.03	2.49	1.09	2	1.94
1	56	4	1	2	0	0	0	115	75	96	24.22	89	0	0	4.3	64.9	3.46	3.03	4.84	0.94	2.21	2.09
1	60	5	1	2	0	0	0	120	80	80	21.87	80	0	0	4.32	39.6	4.44	3.04	0.62	0.98	2.26	2.06
2	52	4	2	2	0	0	0	115	65	77	23.56	68	0	0	4.71	51.5	3.53	3.04	0.67	1.11	2.04	1.93
2	59	4	3	2	1	0	0	135	85	78	18.97	89	0	0	4.49	40.5	4.28	3.04	0.74	1.03	2.26	2.01
1	50	4	2	2	0	0	0	115	75	87	24.52	66	0	0	4.51	57.1	4.03	3.04	0.79	0.84	2.5	2.2
1	60	5	1	3	0	0	1	115	65	84	26.18	82	0	0	4.91	55.7	5.24	3.04	0.81	0.94	1.85	2.1
2	56	4	1	2	1	0	0	105	80	102	32.05	69	0	0	4.39	46.7	4.45	3.04	0.83	0.82	2.27	2.22
2	80	6	1	3	1	0	0	115	85	97	25.68	74	0	0	4.16	87.4	5.71	3.04	0.87	0.96	2.29	2.08
1	53	4	2	2	0	0	0	125	75	92	25.59	79	0	0	4.71	50.8	4.06	3.04	0.87	0.92	2.33	2.12
1	58	4	1	2	0	0	0	110	65	91	24.06	68	0	0	4.51	47.8	4.48	3.04	0.97	0.87	2.45	2.17
1	61	5	2	2	1	0	0	135	85	95	28.04	78	0	0	8.93	45	2.9	3.04	0.99	0.93	2.35	2.11
1	66	5	1	2	0	0	0	125	80	84	22.96	76	0	0	4.79	55.2	6.68	3.04	1.02	0.92	1.82	2.12
2	49	3	1	2	1	0	0	110	80	84	26.22	72	0	0	3.97	37.5	2.75	3.04	1.03	1.01	2.17	2.03
2	52	4	1	2	0	0	0	120	80	74	20.64	76	0	0	4.87	42.9	4.83	3.04	1.08	0.96	2.19	2.08
1	67	5	1	2	1	0	1	110	65	92	24.62	92	1	0	5.69	67.7	5.67	3.04	1.11	0.86	2.28	2.18
2	62	5	1	2	1	0	0	125	85	91	21.94	74	0	0	5.83	43.9	4.26	3.04	1.21	0.87	2.12	2.17
2	72	6	2	2	0	0	0	115	75	88	24.14	74	0	0	4.18	49.7	4.26	3.04	1.25	1.04	1.95	2
2	54	4	1	2	1	0	0	130	85	106	25.78	84	0	0	19.36	43	2.73	3.04	1.33	0.95	2.01	2.09
2	71	6	1	2	0	0	0	115	75	91	23.28	82	0	0	4.87	49	5.76	3.04	1.36	0.88	2.19	2.16
1	72	6	2	2	0	0	0	110	75	110	27.47	78	0	0	5.16	56.5	4.79	3.04	1.41	0.84	2.39	2.2
1	57	4	1	2	0	0	0	100	60	79	21.67	86	0	0	5.36	60.5	6.71	3.04	1.46	1.03	2	2.01
2	47	3	1	2	0	0	0	95	65	75	20.44	71	0	0	4.53	52.3	3.3	3.04	1.48	0.9	2.24	2.14
1	50	4	1	2	0	0	0	110	65	79	19.81	62	0	0	4.1	53.6	5.76	3.04	1.51	0.98	2.03	2.06
2	52	4	1	2	0	0	0	100	65	76	23.78	69	0	0	6.15	42.1	3.58	3.04	1.53	0.92	2.1	2.12
2	57	4	2	2	0	0	0	115	70	102	31.25	67	0	0	3.97	45.8	3.26	3.04	1.68	0.91	2.2	2.13
2	58	4	1	2	0	0	0	105	75	83	22.18	80	0	0	5	46.7	5.23	3.04	1.81	0.96	1.86	2.08
1	69	5	1	2	0	0	0	95	65	95	26.29	72	0	0	4.15	63.1	4.83	3.04	1.82	0.8	2.49	2.24
1	51	4	1	2	1	1	0	130	85	94	25	80	0	0	4.62	59.6	4.49	3.04	1.87	0.9	2.19	2.14
2	81	6	2	3	0	0	0	120	75	76	21.46	84	0	0	6.1	49.5	4.2	3.05	0.49	1.03	2.08	2.02
2	48	3	1	2	1	0	0	125	85	113	36.63	84	0	0	4.18	51.6	4.43	3.05	0.49	1.03	2.08	2.02
2	66	5	1	3	1	0	0	130	85	110	24.98	66	0	0	5.73	53	4.43	3.05	0.49	1.03	2.08	2.02
2	64	5	1	2	1	0	0	105	90	96	25.54	73	0	0	5.42	45.3	5.93	3.05	0.49	1.05	2.08	2
2	50	4	1	2	1	0	0	105	60	79	23.42	75	0	0	4.57	58.5	4.33	3.05	0.49	1.03	2.08	2.02
2	55	4	2	2	1	0	0	130	65	74	21.22	69	0	0	4.1	60	9.16	3.05	0.49	1.03	2.08	2.02
2	63	5	1	2	1	1	0	125	85	105	31.18	78	0	0	5.72	45.6	4.97	3.05	0.5	1.03	2.08	2.02
1	58	4	1	2	0	0	0	90	60	77	24.61	78	0	0	4.1	54.2	4.49	3.05	0.54	0.91	2.24	2.14
2	58	4	1	2	0	0	0	95	65	70	19.15	70	0	0	4.64	44	3.02	3.05	0.65	1.02	2.3	2.03
1	72	6	1	2	1	0	0	110	65	86	29.9	70	0	0	4.33	50.8	5.83	3.05	0.71	1.07	2.1	1.98
2	64	5	2	2	1	0	0	110	65	84	25.71	78	0	0	4.12	58.6	5.08	3.05	0.77	0.97	2.22	2.08
2	60	5	1	2	1	0	0	135	85	100	24	84	0	0	4.76	43.5	4.3	3.05	0.78	0.97	2.3	2.08
1	69	5	1	2	1	0	0	125	80	94	28.23	69	0	0	4.93	70.1	6.07	3.05	0.87	0.95	2.28	2.1
2	50	4	1	3	1	0	0	105	85	85	25.3	79	0	0	4.51	45.3	3.37	3.05	0.91	0.84	2.74	2.21
2	53	4	1	2	1	0	0	125	65	100	29.43	84	0	0	4.86	61.6	5.66	3.05	0.93	0.98	1.88	2.07
2	59	4	1	2	0	0	0	105	75	76	17.63	84	0	0	4.65	45.9	6.52	3.05	0.94	1.02	2.09	2.03
1	56	4	1	2	0	0	0	105	70	100	22.39	74	0	0	5.11	68.2	8.43	3.05	0.96	1.06	1.96	1.99
1	62	5	1	2	1	0	0	120	75	96	24.39	64	0	0	6.18	53	3.24	3.05	0.98	0.84	2.16	2.21
2	55	4	1	2	0	0	0	115	75	74	19.63	86	0	0	5.19	72	5.39	3.05	0.98	0.98	1.93	2.07
2	50	4	1	2	0	0	0	110	65	96	30.18	83	0	0	4.13	28.6	5.36	3.05	1.02	0.95	2.26	2.1
1	76	6	1	3	1	0	0	135	95	78	22.48	76	0	0	5.08	69.7	6.2	3.05	1.05	0.98	2.15	2.07
2	60	5	1	2	1	0	0	105	75	92	24.86	84	0	0	4.59	51.4	4.67	3.05	1.16	0.97	2.29	2.08
1	57	4	1	2	0	0	0	115	70	81	21.51	80	0	0	4.55	56.1	4.12	3.05	1.18	0.87	2.14	2.18
1	57	4	1	2	0	0	0	105	75	107	29.76	82	0	0	5.68	63.4	6.06	3.05	1.24	0.9	2.2	2.15
2	63	5	1	2	1	0	0	135	85	89	25.8	90	0	0	10.39	29	3.1	3.05	1.32	0.9	1.87	2.15
2	51	4	1	2	0	0	0	95	65	94	25.22	87	0	0	4.74	44.4	3.91	3.05	1.41	0.91	2.46	2.14
2	54	4	1	2	1	0	0	150	90	103	33.53	90	0	0	4.11	65.6	4.08	3.05	1.43	1.02	1.88	2.03
2	53	4	1	2	1	0	0	115	85	76	24	76	0	0	4.17	48.2	5.13	3.05	1.45	1.04	1.94	2.01
2	47	3	1	2	1	0	0	105	80	88	25.39	82	0	0	4.08	51.1	3.21	3.05	1.7	0.93	1.99	2.12
2	50	4	1	2	1	0	0	135	85	98	29.83	74	0	0	4.45	48.1	4.11	3.05	1.71	1.19	1.46	1.86
2	67	5	1	2	1	0	0	120	75	91	27.41	74	0	0	4.24	48.1	3.49	3.05	1.72	0.98	2.14	2.07
2	48	3	1	2	1	0	0	145	95	68	19.7	80	0	0	4.3	35.9	4.82	3.06	0.62	1.14	1.96	1.92
1	71	6	1	2	1	0	0	110	70	88	23.74	68	0	0	5.68	90	5.24	3.06	0.67	0.99	2.16	2.07
2	52	4	1	2	0	0	0	95	65	90	23.68	78	0	0	4.5	60.8	3.92	3.06	0.71	0.95	2.16	2.11
2	49	3	1	2	1	0	0	115	85	92	30.48	93	0	0	9.92	43.9	3.13	3.06	0.72	0.9	2.5	2.16
2	51	4	1	2	1	1	0	135	95	96	28.69	78	0	0	4.97	69.4	5.2	3.06	0.73	1.12	1.68	1.94
1	51	4	1	2	0	0	0	95	60	84	21.55	60	0	0	4.89	53.2	6.43	3.06	0.76	1.11	1.92	1.95
1	71	6	1	2	1	0	0	125	75	72	21.61	68	0	0	4.51	52.3	6.1	3.06	0.78	1.09	1.9	1.97
2	51	4	1	2	0	0	0	105	75	101	30.82	82	0	0	6.23	59.2	6.5	3.06	0.79	1.03	1.97	2.03
1	47	3	1	2	0	0	0	95	65	78	21.77	79	0	0	4.52	41.5	5.2	3.06	0.87	2.1	1.1	0.96
2	72	6	2	3	1	1	0	135	90	111	32.82	84	0	0	5.1	59.8	5.65	3.06	0.88	0.99	1.8	2.07
1	53	4	1	2	0	0	0	115	70	93	28.65	68	0	0	4.75	80.7	4.57	3.06	0.89	1	2.21	2.06
2	64	5	1	2	1	0	0	125	85	85	20.13	78	0	0	4.57	43.5	4.9	3.06	0.9	1.25	1.47	1.81
2	62	5	1	2	0	0	0	105	65	74	22.67	85	0	0	4.34	37.6	2.48	3.06	0.93	0.96	2.1	2.1
1	56	4	2	2	1	0	0	115	85	99	28.38	76	0	0	4.86	62.5	3.62	3.06	0.95	0.89	2.24	2.17
2	50	4	1	2	1	1	0	135	75	92	23.44	88	0	0	4.85	51.8	4.4	3.06	0.98	0.9	2.03	2.16
2	58	4	1	2	0	0	0	115	75	93	26.4	78	0	0	5.08	48.7	4.98	3.06	1.01	0.93	2.26	2.13
2	48	3	2	2	0	0	0	115	75	85	25.8	82	0	0	3.99	35.4	3.12	3.06	1.06	0.96	2.03	2.1
2	60	5	2	3	1	0	0	110	75	92	27.19	86	0	0	4.36	45.2	4.61	3.06	1.13	0.96	2.17	2.1
2	53	4	1	2	0	0	0	95	60	88	29.14	92	0	0	4.12	50.3	4.93	3.06	1.2	1.02	2.19	2.04
2	67	5	1	2	0	0	1	105	75	101	27.11	80	0	0	7.37	52.7	7.19	3.06	1.22	0.89	2.22	2.17
2	47	3	1	2	0	0	0	95	65	97	31.6	89	0	0	5.71	68.7	3.78	3.06	1.26	0.95	2.14	2.11
1	62	5	1	2	1	0	0	135	90	103	25.22	79	0	0	5.36	62.2	3.35	3.06	1.31	0.85	2.14	2.21
1	48	3	1	2	0	0	0	95	65	85	22.04	75	0	0	4.14	75.5	5.77	3.06	1.45	0.87	2.27	2.19
2	50	4	1	2	0	0	0	100	65	110	34.11	90	0	0	4.64	44.3	3.03	3.06	1.45	0.76	2.72	2.3
1	48	3	1	2	0	0	0	105	75	98	27.89	58	1	0	4.03	60.3	6.49	3.06	1.51	0.87	2.37	2.19
1	68	5	1	2	0	0	0	105	65	94	23.95	113	0	0	5.88	61.7	5.89	3.06	1.53	0.85	2.42	2.21
1	70	6	2	3	0	0	0	115	75	92	24.14	92	0	0	6.69	72.1	4.51	3.06	1.69	0.9	2.07	2.16
1	50	4	1	2	1	0	0	115	85	83	23.83	79	1	1	4.36	66.4	4.19	3.07	0.23	0.97	2.28	2.1
1	52	4	1	2	0	0	0	105	75	98	24.74	75	0	0	4.44	48.8	5.52	3.07	0.39	1.04	1.98	2.03
1	61	5	2	2	1	1	1	115	85	89	24.01	70	0	0	6.39	74.2	6.5	3.07	0.6	0.96	2.03	2.11
1	35	2	2	2	0	0	0	115	75	78	22.41	78	0	0	4.92	56.7	4.7	3.07	0.64	1.06	2	2.01
2	69	5	1	3	1	0	0	120	70	89	23.07	84	0	0	4.46	52.8	4.06	3.07	0.69	1.09	2.14	1.98
1	75	6	1	2	0	0	0	110	65	95	25.22	99	1	0	4.22	57.8	4.99	3.07	0.75	1.06	2.01	2.01
1	51	4	1	2	0	0	0	115	70	79	28.55	78	0	0	4.32	54.3	4.69	3.07	0.77	0.99	1.92	2.08
1	78	6	1	2	0	0	0	115	75	77	20.17	85	0	0	5.4	55.7	4.41	3.07	0.77	0.93	2.28	2.14
1	60	5	1	2	1	0	0	125	85	87	18.94	70	0	0	4.42	54.8	3.16	3.07	0.85	1.01	2.19	2.06
1	58	4	2	2	0	0	0	115	75	85	23.38	93	0	0	4.88	79.4	5.95	3.07	0.86	0.95	2.48	2.12
2	52	4	1	2	1	0	0	140	80	84	24.52	85	0	0	4.56	43.9	3.43	3.07	0.86	1.07	1.9	2
2	59	4	1	2	0	0	0	115	75	80	23.74	66	0	0	3.94	48.2	7.2	3.07	0.87	1.19	1.75	1.88
1	60	5	1	2	0	0	0	125	70	87	25.46	70	0	0	4.57	72.4	3.75	3.07	1	0.97	2.31	2.1
1	87	6	1	3	1	0	1	125	85	91	25.71	80	0	0	4.46	60.4	5.54	3.07	1.04	0.97	2.16	2.1
2	52	4	1	2	0	0	0	95	60	95	29.17	76	0	0	4.11	49.4	4.76	3.07	1.06	1.01	2.23	2.06
2	47	3	1	2	0	0	0	115	75	90	25.39	84	0	0	4.24	36.8	2.34	3.07	1.08	1.01	2.09	2.06
2	77	6	1	2	1	0	0	130	75	80	27.03	80	0	0	4.81	54.3	4.82	3.07	1.09	0.87	2.45	2.2
2	66	5	1	2	1	0	0	115	85	122	35.8	90	0	0	3.91	67.8	4.61	3.07	1.09	1.01	1.96	2.06
1	71	6	1	2	1	0	0	130	85	90	26.71	87	0	0	4.87	67.5	4.31	3.07	1.09	0.95	2.28	2.12
1	50	4	1	2	0	0	0	115	75	79	19.27	78	1	1	4.28	62.2	3.59	3.07	1.12	0.92	2.22	2.15
2	75	6	1	2	1	0	1	115	75	92	23.42	112	0	0	11.61	36.9	3.35	3.07	1.16	0.91	2.22	2.16
2	50	4	1	2	1	0	0	125	75	98	29.22	72	0	0	4.33	48.3	3.73	3.07	1.29	0.9	2.2	2.17
2	54	4	2	2	0	0	0	115	75	77	23.56	78	0	0	4	39.8	5.17	3.07	1.45	0.8	2.32	2.27
1	57	4	1	2	0	0	0	105	65	94	26.61	83	0	0	4.78	59.7	3.89	3.07	1.46	0.88	2.33	2.19
1	48	3	1	2	0	0	0	110	65	88	29.27	76	0	0	5.28	80.4	3.75	3.07	1.82	0.81	2.33	2.26
2	63	5	1	2	0	0	0	105	75	101	32.03	84	0	0	5.22	52.6	4.84	3.07	1.83	0.77	2.35	2.3
2	59	4	1	2	0	0	0	110	65	94	28.31	82	0	0	5.39	45.8	4.74	3.07	1.94	0.85	2.15	2.22
1	54	4	1	2	1	0	0	120	75	96	27.99	92	0	0	7.48	98.6	4.93	3.07	2.54	0.72	2.35	2.35
1	71	6	2	2	0	0	0	105	75	112	22.1	70	0	0	4.45	52.4	5.7	3.08	0.27	0.92	2.38	2.16
2	48	3	1	2	1	0	0	105	65	90	30.38	73	0	0	4.85	36.2	3.4	3.08	0.43	0.9	2.45	2.18
2	48	3	1	2	0	0	0	95	65	70	23.98	74	0	0	4.7	31.1	6.26	3.08	0.58	1.11	2.1	1.97
2	61	5	1	2	0	0	0	80	45	77	20.03	80	0	0	4.18	53.7	3.85	3.08	0.66	1.24	1.66	1.84
2	64	5	1	2	1	0	0	105	80	66	18.42	86	0	0	4.61	44.8	4.09	3.08	0.69	0.98	2.35	2.1
1	47	3	1	2	0	0	0	95	65	80	22.06	60	0	0	4.19	57.3	4.74	3.08	0.7	0.94	2.16	2.14
2	50	4	1	2	1	1	0	155	105	119	37.17	60	0	0	3.97	51.7	3.07	3.08	0.72	1.2	1.91	1.88
1	49	3	1	2	0	0	0	95	70	84	22.48	62	0	0	3.98	57.9	3.53	3.08	0.76	1.24	1.57	1.84
2	50	4	1	2	0	0	0	115	65	86	26.03	78	0	0	4.44	52.4	2.44	3.08	0.77	0.95	2.29	2.13
2	48	3	1	2	0	0	0	105	70	82	25.71	84	0	0	4.1	38.3	4.18	3.08	0.79	0.99	2.07	2.09
1	58	4	1	2	0	0	0	115	75	88	23.03	80	0	0	5.3	60.4	3.85	3.08	0.84	0.93	1.69	2.15
1	73	6	1	2	1	0	0	125	75	128	31.25	65	0	0	4.41	65.1	5.05	3.08	0.85	0.86	2.58	2.22
1	75	6	1	2	1	0	0	125	90	106	29.41	91	0	0	4.55	69.4	5.44	3.08	0.87	0.87	2.51	2.21
2	52	4	1	2	1	0	0	130	85	91	27.41	74	0	0	4.06	38.3	5.18	3.08	0.88	0.93	2.46	2.15
1	69	5	1	2	1	0	0	105	75	89	17.93	76	0	0	5.39	50.7	6.23	3.08	0.9	0.99	2.1	2.09
1	49	3	1	2	0	0	0	95	65	77	22.48	84	0	0	4.55	61.9	4.1	3.08	0.94	1.04	2.19	2.04
2	49	3	1	2	1	0	0	105	80	78	24.56	86	0	0	5.2	55.2	2.92	3.08	0.94	0.94	2.44	2.14
2	51	4	2	2	0	0	0	125	65	90	26.94	81	0	0	3.92	44.3	6.18	3.08	0.99	0.96	2.25	2.12
1	63	5	1	2	1	0	0	135	85	89	24.44	90	0	0	4.97	60.1	4.26	3.08	0.99	0.88	2.49	2.2
1	75	6	1	2	0	0	0	110	75	101	25.61	85	0	0	5.68	94.9	9.36	3.08	1.06	0.95	2.16	2.13
1	72	6	2	2	0	0	0	120	65	110	24.02	67	0	0	6.23	57.3	4.56	3.08	1.08	0.86	2.29	2.22
1	53	4	2	2	0	0	0	95	65	96	24.68	80	1	1	4.63	61.1	4.83	3.08	1.1	1.08	1.5	2
2	50	4	1	2	0	0	0	125	80	90	22.35	74	0	0	5	41.4	3.55	3.08	1.11	1.16	1.64	1.92
1	53	4	1	2	0	0	0	105	75	90	26.03	83	1	0	3.9	55.1	4.92	3.08	1.14	0.99	2.12	2.09
1	55	4	1	2	0	0	0	105	75	113	31.14	68	0	0	4.07	52.4	4.18	3.08	1.21	1	2.11	2.08
2	52	4	1	2	0	0	0	115	75	90	25.15	80	0	0	4.11	46.7	2.81	3.08	1.23	1.03	2.04	2.05
2	60	5	1	2	0	0	0	105	75	83	20.96	82	0	0	4.48	43.3	3.64	3.08	1.32	0.88	2.36	2.2
2	59	4	1	2	0	0	0	95	60	86	26.56	64	0	0	4.53	44.3	2.83	3.08	1.33	0.83	2.32	2.25
2	56	4	1	2	0	0	0	105	65	86	26.16	80	0	0	5.23	35.6	5.5	3.08	1.33	0.97	2.24	2.11
1	60	5	1	2	0	0	0	95	65	101	25.91	73	1	0	4.55	85.7	6.76	3.08	1.36	0.93	2.31	2.15
2	47	3	1	2	1	1	1	130	85	102	27.64	90	0	0	11.41	35.6	3.68	3.08	1.54	0.9	2.27	2.18
2	51	4	1	2	0	0	0	105	60	92	27.05	73	0	0	6.02	52.1	4.7	3.08	1.59	0.83	2.32	2.25
2	50	4	1	2	1	0	0	115	75	110	36.57	84	0	0	6.5	58	4.44	3.08	1.62	1	1.94	2.08
1	58	4	1	2	0	0	0	115	75	95	25.85	77	0	0	4.69	59.6	3.17	3.08	1.64	0.85	2.48	2.23
2	64	5	1	2	1	0	0	155	85	114	33.2	75	0	0	4.72	52.3	3.16	3.08	1.65	0.89	2.16	2.19
1	59	4	1	2	0	0	0	105	65	75	20.06	60	0	0	4.33	66.5	5.82	3.08	1.7	0.83	2.16	2.25
2	47	3	2	2	0	0	0	105	65	96	28.06	86	0	0	4.61	44.9	4	3.08	1.8	0.96	2.12	2.12
1	78	6	1	2	1	1	0	140	55	95	27.28	85	0	0	6.56	63.2	3.81	3.08	1.85	0.78	2.47	2.3
2	50	4	1	2	1	0	0	115	85	72	20.64	88	0	0	4.61	43.2	6.37	3.08	2.71	0.78	2.46	2.3
2	57	4	1	2	0	0	0	95	60	72	22.15	72	0	0	4.7	73	6.14	3.09	0.54	1.13	1.54	1.96
1	68	5	1	2	0	0	0	115	75	87	20.9	59	0	0	4.37	45.9	4.26	3.09	0.58	1.14	1.92	1.95
2	53	4	1	2	1	0	0	115	85	98	30.18	83	0	0	4.8	50	3.46	3.09	0.65	1.1	2.16	1.99
2	47	3	1	2	0	0	0	115	75	80	25.04	61	0	0	4.52	49.8	3.25	3.09	0.68	1.1	1.9	1.99
1	48	3	2	2	1	0	0	115	80	82	27.51	79	0	0	10.05	25.5	10.6	3.09	0.69	1.12	1.7	1.97
1	48	3	1	2	0	0	0	110	75	83	21.89	74	0	0	4.29	67.8	4.72	3.09	0.7	0.93	2.29	2.16
2	47	3	1	2	1	0	0	105	85	78	24.69	78	0	0	4.66	50.7	2.02	3.09	0.76	1.02	2.22	2.07
2	58	4	1	2	1	0	0	135	85	91	24.99	74	0	0	4.04	41.5	3.39	3.09	0.78	1.1	2.15	1.99
1	65	5	1	2	0	0	0	110	65	86	24.97	88	0	0	6	52.2	5.15	3.09	0.81	0.93	2.43	2.16
2	55	4	2	2	0	0	0	115	70	79	23.23	72	0	0	4	52.4	5.82	3.09	0.89	0.96	2.24	2.13
2	52	4	2	2	1	0	0	125	85	80	23.37	80	0	0	4.1	51.4	3.26	3.09	0.91	1.15	1.83	1.94
1	67	5	1	2	1	0	0	125	85	90	24.56	85	0	0	4.1	57.4	5.5	3.09	0.95	0.93	2.41	2.16
1	59	4	1	2	0	0	0	115	75	95	26.15	90	0	0	4.22	67.3	4.25	3.09	0.95	0.97	2.17	2.12
2	55	4	1	2	0	0	0	125	75	92	24.34	73	0	0	4.64	54.8	2.93	3.09	1.03	0.9	2.31	2.19
2	56	4	1	2	1	0	0	135	85	85	21.3	80	0	0	5.16	53.9	3.84	3.09	1.04	1	2.09	2.09
2	47	3	3	2	1	0	0	115	75	85	27.06	78	0	0	4.49	44.3	3.22	3.09	1.05	1	2.11	2.09
2	60	5	1	2	0	0	0	115	75	80	20.89	82	0	0	4.9	53.1	5.29	3.09	1.14	0.87	2.12	2.22
2	70	6	1	2	1	0	0	130	75	99	25.45	90	0	0	4.89	34.9	3.6	3.09	1.17	0.94	2.29	2.15
1	48	3	1	2	0	0	0	125	75	100	26.72	91	1	0	4.08	51.8	4.06	3.09	1.24	0.93	2.29	2.16
1	61	5	1	2	1	0	0	120	75	90	23.23	90	0	0	4.48	66.4	4.7	3.09	1.29	0.86	2.15	2.23
1	75	6	1	2	0	0	0	110	65	74	16.46	74	0	0	4.36	61.3	5.06	3.09	1.29	1	2.03	2.09
1	49	3	1	2	0	0	0	125	75	107	32.49	78	0	0	3.48	72.5	2.78	3.09	1.34	0.85	2.26	2.24
2	67	5	1	2	0	0	0	120	70	92	24.24	88	0	0	4.64	93.9	15.35	3.09	1.47	1.14	2.28	1.95
2	48	3	2	2	0	0	0	115	75	103	33.28	84	0	0	4.67	45.5	3.09	3.09	1.54	1.02	1.9	2.07
1	55	4	1	2	0	0	0	105	65	79	21.5	63	1	0	5.01	59.6	5.5	3.09	1.71	0.89	2.41	2.2
2	67	5	1	2	1	0	0	130	80	111	34.63	69	0	0	4.11	42.7	4.16	3.09	2.07	1.02	1.98	2.07
1	57	4	1	2	0	0	0	125	75	92	24.22	67	0	0	5.24	70.1	5.65	3.09	2.22	0.78	2.13	2.31
2	52	4	1	2	0	0	0	105	60	93	31.2	85	0	0	4.22	46.8	5.14	3.09	2.25	0.87	2.38	2.22
2	53	4	1	2	1	0	0	135	85	107	32.88	85	0	0	6.62	46.6	4.11	3.09	2.38	1.11	1.68	1.98
1	57	4	1	2	1	0	1	115	75	98	27.22	70	1	1	5.12	62.7	3.51	3.09	2.63	0.78	2.18	2.31
2	69	5	1	2	1	0	1	145	95	112	29.52	72	0	0	11.16	51.2	2.72	3.09	2.95	0.87	2.05	2.22
1	63	5	1	2	0	1	1	105	60	97	26.13	61	0	0	8.62	74.3	6.2	3.1	0.18	0.68	2.28	2.42
2	50	4	1	2	0	0	0	95	60	89	22.1	85	0	0	4.07	51.6	3.79	3.1	0.46	1.06	1.72	2.04
2	71	6	2	2	0	0	0	125	75	80	23.05	84	0	0	3.93	51.9	4.53	3.1	0.54	1.15	1.9	1.95
2	55	4	1	2	1	0	0	140	80	100	29.67	77	0	0	3.99	69	3.08	3.1	0.59	2	1.2	1.1
1	67	5	1	2	1	0	0	135	90	97	32.45	66	0	0	7.65	52.3	4.53	3.1	0.71	1.01	2.38	2.09
2	55	4	1	2	0	0	0	115	70	90	27.12	90	0	0	4.5	58	2.3	3.1	0.78	1.7	3.1	1.4
2	20	1	2	1	0	0	0	90	55	80	24.61	72	0	0	4.16	55.9	4.7	3.1	0.78	0.92	2.26	2.18
1	58	4	2	2	0	0	0	115	75	90	24.75	75	0	0	4.83	60	6.54	3.1	0.84	0.97	2.22	2.13
1	53	4	2	2	0	0	0	125	75	100	27.63	74	1	0	4.68	56.1	5.82	3.1	0.84	0.97	2.22	2.13
2	51	4	1	2	1	0	0	95	60	70	25.63	73	0	0	4.54	47	4.89	3.1	0.85	1.1	2.02	2
1	61	5	2	2	0	0	0	105	75	80	24.24	63	0	0	4.5	47.4	4.17	3.1	0.91	0.96	2.46	2.14
1	71	6	1	2	0	0	0	105	65	92	24.17	100	1	0	4.82	59.2	4.67	3.1	0.93	0.93	2.41	2.17
2	50	4	2	2	1	0	0	125	85	84	27.34	87	0	0	4.59	54	2.41	3.1	0.94	1.02	2.16	2.08
2	70	6	2	2	1	0	0	125	75	84	19.31	58	0	0	3.91	52.3	4.72	3.1	0.97	0.94	2.35	2.16
2	53	4	1	2	0	0	0	125	70	76	21.64	80	0	0	4.29	55.2	5.88	3.1	1	0.96	2.21	2.14
1	71	6	1	2	0	0	0	115	75	94	24.3	68	0	0	4	35.5	2.75	3.1	1.03	0.9	2.51	2.2
2	73	6	1	2	1	0	0	115	85	90	19.72	85	0	0	4.6	68.2	5.44	3.1	1.04	1.08	2.09	2.02
2	70	6	2	2	1	0	0	135	85	106	32.46	85	0	0	4.86	52.5	3.54	3.1	1.09	1.06	2.04	2.04
2	50	4	1	2	0	1	1	110	75	80	23.94	77	0	0	5.26	45.1	5.66	3.1	1.1	1.1	2.1	2
1	46	3	2	2	1	0	0	140	80	89	24.54	80	1	1	4.5	66	3.1	3.1	1.1	1.1	2.1	2
2	52	4	1	2	1	0	0	115	85	90	21.91	83	0	0	4.29	50.4	3.79	3.1	1.1	1	2.16	2.1
1	63	5	1	2	1	0	0	115	85	89	23.18	81	0	0	4.19	61.8	4.11	3.1	1.11	1.11	1.82	1.99
2	68	5	1	2	0	0	0	115	65	99	29.32	67	0	0	4.56	45.3	3.77	3.1	1.12	0.81	2.4	2.29
2	66	5	1	2	1	0	1	120	92	107	30.73	81	0	0	5.72	18.7	3.17	3.1	1.2	1.2	2.5	1.9
2	46	3	1	2	1	1	0	115	70	86	25.33	85	0	0	4.29	43.6	3.39	3.1	1.2	1.1	2.1	2
2	52	4	1	2	0	0	0	105	65	108	29.9	84	0	0	6.04	33.2	4.95	3.1	1.2	1.1	2.1	2
1	46	3	1	2	0	0	0	115	75	85	24.24	81	0	0	4.42	62.8	5.69	3.1	1.21	1.1	2.1	2
2	47	3	1	2	0	0	0	115	75	95	23.73	69	0	0	4.29	54.2	3.19	3.1	1.21	0.9	2.11	2.2
1	52	4	1	2	0	0	0	125	70	110	31.64	70	0	0	4.58	61.8	3.55	3.1	1.23	0.91	2.34	2.19
2	46	3	2	2	0	0	0	115	75	84	28.62	72	0	0	4.38	34.8	4.39	3.1	1.25	1.4	3.25	1.7
1	63	5	2	2	0	0	0	125	65	89	23.89	60	0	0	3.92	74.9	5.08	3.1	1.28	0.84	2.5	2.26
2	47	3	2	2	0	0	0	115	75	98	35.75	80	0	0	4.91	56.4	3.63	3.1	1.32	0.9	2.3	2.2
2	73	6	1	3	0	0	0	110	65	92	28.45	81	0	0	4.69	48.8	4.02	3.1	1.34	1.03	1.88	2.07
2	62	5	1	2	0	0	0	105	65	66	23.88	86	0	0	4.7	40.1	2.53	3.1	1.38	0.89	2.41	2.21
1	73	6	1	2	0	0	0	125	75	95	28.6	85	0	0	4.79	77.1	5.31	3.1	1.53	0.91	2.43	2.19
2	57	4	2	2	1	0	0	125	85	105	27.59	74	0	0	4.96	54.5	4.99	3.1	1.78	1.5	2.1	1.6
1	52	4	2	2	0	0	0	115	75	92	25.65	95	0	0	4.06	60.8	4.54	3.1	1.8	1.5	1.2	1.6
1	67	5	1	2	0	0	0	100	75	100	26.04	69	0	0	4.38	64.2	6.01	3.1	1.84	0.85	2.48	2.25
2	48	3	1	2	0	0	0	100	60	106	41.86	75	0	0	4.69	61.6	4.62	3.1	1.9	0.95	2.22	2.15
1	61	5	2	2	1	0	0	125	75	110	30.85	90	0	0	6.03	97	4.22	3.1	2	1.77	1.69	1.33
1	53	4	1	2	1	0	0	130	85	81	23.23	71	1	1	4.46	56.5	5.02	3.1	2	1.8	0.69	1.3
1	56	4	1	2	0	1	0	115	70	95	26.49	80	0	0	4.72	62.5	4.5	3.1	2	1.68	3.2	1.42
1	54	4	1	2	1	0	1	115	80	85	26.56	69	0	0	12.29	69.3	3.13	3.1	2	1.8	0.96	1.3
2	46	3	2	2	0	0	0	110	70	89	26.78	79	0	0	6.4	64	4.61	3.1	2	1.9	2.3	1.2
2	58	4	1	2	1	0	0	135	95	117	38.19	80	0	0	4.67	50.3	4.47	3.1	2.2	0.85	2.42	2.25
2	49	3	1	2	1	0	0	95	60	90	28.35	76	0	0	4.48	42.7	3.11	3.1	2.69	1.68	1.89	1.42
2	53	4	1	2	0	0	0	110	65	77	21.75	98	0	0	4.74	38.3	3.28	3.1	2.94	0.83	2.47	2.27
1	65	5	1	2	0	0	0	105	70	96	22.76	79	0	0	4.07	54.7	5.85	3.11	0.55	0.97	2.22	2.14
2	57	4	1	2	0	0	0	115	75	92	26.62	85	0	0	4.18	47.3	3.59	3.11	0.62	0.98	2.23	2.13
2	56	4	1	2	1	0	0	145	90	68	16.42	75	0	0	4.67	54.9	4.36	3.11	0.7	1.16	1.86	1.95
2	54	4	1	2	0	0	0	125	80	83	22.52	85	0	0	4.38	42.1	3.08	3.11	0.71	1.01	1.93	2.1
1	81	6	2	2	0	0	0	115	75	98	25.62	76	0	0	4.98	64.8	5.61	3.11	0.72	0.96	2.41	2.15
1	56	4	1	2	1	0	0	105	80	80	48.82	103	0	0	7.04	77.9	6.24	3.11	0.75	0.98	2.28	2.13
1	53	4	1	2	0	0	0	115	75	96	28.83	82	0	0	3.97	53.7	3.88	3.11	0.76	0.95	2.34	2.16
2	67	5	1	2	1	0	0	140	75	96	29.9	80	0	0	4.93	41.5	4.44	3.11	0.77	1.07	2.14	2.04
2	48	3	1	2	0	0	0	105	65	90	31.11	84	0	0	4.4	26.7	2.73	3.11	0.8	0.91	2.44	2.2
2	66	5	1	3	0	0	0	105	65	78	20.41	62	0	0	4.39	59.8	5.65	3.11	0.81	0.9	1.97	2.21
2	52	4	1	2	1	0	0	105	85	94	23.15	70	0	0	4.4	46.8	4.53	3.11	0.81	0.98	2.22	2.13
2	58	4	1	2	1	0	0	145	95	80	21.91	89	0	0	4.3	32.2	4.57	3.11	0.81	0.86	2.4	2.25
2	52	4	1	2	0	0	0	115	65	80	23.6	75	1	0	5.26	65	5.26	3.11	0.85	1.32	1.63	1.79
1	69	5	1	2	1	0	0	115	65	90	25.35	80	0	0	4.85	71	4.87	3.11	0.93	0.95	2.27	2.16
1	79	6	1	2	1	0	0	140	80	100	24.69	80	0	0	4.55	50.6	3.32	3.11	0.98	1.01	2.22	2.1
2	62	5	1	2	1	0	0	135	90	88	21.5	86	0	0	5.44	46.4	3.62	3.11	1	0.96	2.38	2.15
2	52	4	2	2	1	0	0	120	70	93	28.4	83	0	0	4.83	37.9	4.58	3.11	1.01	1.07	2.11	2.04
2	47	3	1	2	0	0	0	105	65	88	28.3	86	0	0	4.72	49.2	4.34	3.11	1.07	0.89	2.39	2.22
1	72	6	1	2	0	0	0	115	75	84	21.72	74	0	0	4.59	71.9	4.62	3.11	1.15	1.02	2.26	2.09
2	50	4	1	2	1	0	0	105	80	91	28.25	76	0	0	4.85	40.6	3.1	3.11	1.24	1.06	1.96	2.05
1	50	4	1	2	1	0	0	135	95	80	22.92	80	0	0	4.76	60.2	4.7	3.11	1.25	1.01	2.03	2.1
2	55	4	2	2	1	0	0	130	80	103	28.96	95	0	0	5.7	57.7	5.63	3.11	1.26	1.02	2.16	2.09
1	63	5	2	2	0	0	0	110	70	115	33.26	92	0	0	3.94	81.3	3.76	3.11	1.26	0.94	2.38	2.17
1	52	4	1	2	0	0	0	115	75	101	28.2	81	0	0	5.1	65.3	4.59	3.11	1.28	0.82	2.32	2.29
1	63	5	1	2	1	0	0	160	95	102	24.16	78	1	0	4.38	86.7	4.47	3.11	1.29	0.82	2.29	2.29
2	68	5	1	2	1	0	0	115	75	98	24.46	78	0	0	4.48	45.5	2.29	3.11	1.29	0.95	2.34	2.16
2	49	3	1	2	0	0	0	95	60	74	21.87	86	0	0	4.69	34.3	4.99	3.11	1.3	1	2.18	2.11
1	49	3	2	2	0	0	0	110	75	100	27.97	64	0	0	4.58	62.7	4.48	3.11	1.35	0.83	2.4	2.28
2	47	3	1	2	0	0	0	105	65	68	21.93	76	0	0	4.16	46	4.68	3.11	1.36	0.89	1.91	2.22
2	53	4	1	2	1	0	0	115	85	96	27.1	86	0	0	5.48	50.2	4.25	3.11	1.4	1.01	2.11	2.1
1	69	5	1	2	1	0	0	135	75	108	28.26	78	0	0	4.57	95.5	5.84	3.11	1.49	0.98	2.11	2.13
2	59	4	1	2	1	0	0	140	95	104	27.34	80	0	0	4.22	53.9	5.02	3.11	1.6	0.84	2.33	2.27
1	67	5	2	2	1	0	0	105	65	103	26.81	66	0	0	6.26	72.7	5.13	3.11	1.91	0.7	2.48	2.41
1	69	5	1	2	0	0	0	125	75	96	27.29	82	0	0	4.71	57.5	4.9	3.11	2.36	0.89	2.43	2.22
2	51	4	1	2	1	0	0	145	95	96	28.35	88	0	0	4.63	64.7	2.92	3.11	2.4	0.89	2.16	2.22
2	46	3	2	2	1	0	0	135	90	90	24.01	72	0	0	5.88	39.4	5.58	3.12	0.52	1.07	2.28	2.05
2	52	4	1	2	0	0	0	110	60	91	31.16	80	0	0	4.82	61.3	4.39	3.12	0.57	1.08	2.11	2.04
2	74	6	1	3	1	0	0	135	85	82	20.25	82	0	0	4.86	42.6	4.66	3.12	0.71	1.07	2.25	2.05
1	82	6	1	2	1	0	0	135	75	92	27.94	83	0	0	4.12	67.5	6.53	3.12	0.78	1.11	2.14	2.01
1	54	4	2	2	0	0	0	115	75	81	24.09	77	0	0	4.53	50.7	5.59	3.12	0.8	1.09	2	2.03
2	45	3	2	2	0	0	0	115	75	100	32.3	76	0	0	4.44	44.7	1.59	3.12	0.8	1	2.11	2.12
2	47	3	1	2	0	0	0	115	70	79	21.03	80	0	0	4.65	51	4.41	3.12	0.81	1.08	1.82	2.04
2	53	4	2	2	1	0	0	135	85	88	27.24	74	0	0	4.25	61.2	3.04	3.12	0.83	1.12	1.85	2
2	50	4	1	2	1	0	0	120	85	107	33.32	82	0	0	4.62	44.2	4.17	3.12	0.84	1.04	2.1	2.08
2	48	3	2	2	0	0	0	115	75	84	25.97	84	0	0	4.92	32.2	5.53	3.12	0.84	0.98	1.99	2.14
2	47	3	1	2	0	0	0	110	65	88	30.85	67	0	0	4.71	47.4	3.73	3.12	0.85	1.14	1.92	1.98
1	59	4	2	2	0	0	0	115	70	81	20.96	65	0	0	4.26	65	5.8	3.12	0.9	1.12	2.05	2
1	72	6	2	2	1	0	0	115	85	94	26.13	72	0	0	4.84	61.8	4.06	3.12	0.94	0.96	2.41	2.16
1	46	3	1	3	0	0	0	95	65	71	17.53	80	0	0	4.09	79.4	5.49	3.12	0.95	0.93	2.43	2.19
2	55	4	2	2	1	0	0	115	85	77	23.83	84	0	0	4.15	38.7	5.4	3.12	0.96	1.06	1.81	2.06
2	63	5	1	2	1	0	0	130	85	78	21.75	80	0	0	4.22	48.3	6.66	3.12	1.01	1.01	2.22	2.11
2	54	4	1	2	0	0	0	105	60	88	24.56	75	0	0	4.47	56	5.87	3.12	1.03	1.23	1.53	1.89
2	67	5	1	3	0	0	0	120	65	75	19.04	77	0	0	4.41	51.1	4.37	3.12	1.03	0.92	2.34	2.2
1	58	4	1	2	0	0	0	115	75	94	27.66	80	1	0	4.26	59.2	3.42	3.12	1.08	0.91	2.55	2.21
2	52	4	1	2	1	0	0	115	85	84	24.44	84	0	0	4.5	36.8	3.86	3.12	1.11	0.99	2.31	2.13
1	53	4	1	2	0	0	0	115	75	72	19.05	80	0	0	4.3	52.9	4.64	3.12	1.13	1.03	1.88	2.09
2	50	4	1	2	0	0	0	95	65	92	24.01	86	0	0	4.17	46.1	5.99	3.12	1.15	0.88	2.21	2.24
1	59	4	1	2	1	0	1	120	70	107	25.39	80	0	0	9.81	47.8	5.75	3.12	1.17	0.83	2.44	2.29
1	53	4	1	2	0	0	0	115	75	80	22.55	80	0	0	4.33	49.8	3.71	3.12	1.21	0.87	2.55	2.25
1	60	5	1	2	0	0	0	95	60	100	19.38	68	0	0	5.03	60	6.58	3.12	1.22	0.86	2.38	2.26
2	60	5	1	2	1	0	0	115	85	112	40.89	82	0	0	7.48	66.9	5.57	3.12	1.22	0.82	2.43	2.3
2	47	3	1	2	1	0	0	115	85	109	34.67	78	0	0	4.54	40.8	3.32	3.12	1.28	0.92	2.46	2.2
1	63	5	2	2	1	0	0	135	85	94	24.09	80	0	0	3.78	56.5	3.12	3.12	1.28	2.1	3.01	1.02
2	49	3	1	2	0	0	0	110	65	82	27.34	80	0	0	4.5	46.6	4.21	3.12	1.32	1.01	2.12	2.11
2	59	4	1	2	1	0	0	125	85	100	36.12	78	0	0	4.34	45.3	3.38	3.12	1.48	0.87	2.45	2.25
1	75	6	1	2	0	0	1	115	75	116	35.17	79	0	0	4.75	49.1	5.7	3.12	1.66	0.83	2.29	2.29
1	65	5	1	2	1	0	0	135	85	98	23.62	76	0	0	4.08	60.4	5.36	3.12	1.86	0.97	2.1	2.15
1	52	4	1	2	1	0	0	105	70	97	27.05	69	0	0	4.54	64	4.62	3.12	1.91	0.81	2.41	2.31
2	78	6	1	2	1	0	0	125	85	95	27.39	84	0	0	5.19	58.8	7.19	3.12	2.13	0.99	2.03	2.13
1	52	4	2	2	0	0	0	95	65	85	19.49	64	0	0	5.66	58.6	3.96	3.12	2.14	0.91	2.15	2.21
2	74	6	1	2	0	0	0	105	70	88	23.68	78	0	0	4.01	40.2	5.73	3.12	2.48	0.71	2.45	2.41
1	65	5	1	2	1	0	0	135	85	88	24.17	81	0	0	4.57	45.7	4.11	3.12	2.56	2.2	3.2	0.92
1	75	6	2	2	0	0	0	115	75	112	32.05	80	0	0	5.39	57.3	3.97	3.13	0.2	0.77	2.47	2.36
1	24	1	2	2	0	0	0	115	75	88	24.31	82	0	0	4.69	57.3	4.95	3.13	0.54	1.05	2.27	2.08
1	67	5	1	2	0	0	0	105	75	96	24.09	78	0	0	3.91	65.3	4.95	3.13	0.6	0.94	2.53	2.19
1	61	5	1	2	0	0	0	115	70	89	30.48	69	0	0	5.48	62.2	6.76	3.13	0.8	0.95	2.46	2.18
2	51	4	1	2	0	0	0	115	75	70	23.23	78	0	0	4.37	47	3.63	3.13	0.83	1.03	2.31	2.1
2	55	4	1	2	0	0	0	105	75	95	32.04	76	0	0	4.5	38.2	4.23	3.13	0.87	0.94	2.42	2.19
2	58	4	1	3	0	0	0	95	60	86	27.85	74	0	0	4.35	46.9	5.73	3.13	0.88	1.13	1.98	2
2	58	4	1	2	1	0	0	115	85	105	29.21	76	0	0	4.36	52.8	2.68	3.13	0.91	0.96	2.42	2.17
1	83	6	1	2	1	0	0	115	70	91	22.89	69	0	0	4.77	58.9	3.97	3.13	0.92	1.22	1.62	1.91
2	53	4	1	2	1	0	0	135	85	100	30.13	86	0	0	8.97	37.1	5.3	3.13	1.09	1.25	1.75	1.88
1	79	6	1	2	1	0	0	115	70	98	26.67	84	0	0	8.04	67.6	4.97	3.13	1.15	0.89	2.51	2.24
1	63	5	1	2	1	0	0	135	65	75	24.34	64	0	0	3.98	56.7	4.83	3.13	1.16	0.88	2.44	2.25
1	47	3	2	2	0	0	0	110	75	86	31.63	62	0	0	4.04	63.2	5.68	3.13	1.16	0.94	2.43	2.19
2	76	6	1	2	1	0	0	115	75	95	26.04	74	0	0	4.14	42.6	4.53	3.13	1.18	1.09	2.08	2.04
2	66	5	1	2	1	0	0	125	95	87	21.4	73	0	0	4.53	46.1	3.13	3.13	1.21	1.11	1.91	2.02
1	58	4	2	2	0	0	0	115	75	89	22.86	63	0	0	4.05	53.9	3.66	3.13	1.22	0.97	2.29	2.16
1	56	4	1	2	1	0	0	105	70	80	25.39	76	0	0	4.76	39.3	3.79	3.13	1.28	0.95	2.16	2.18
2	49	3	1	2	0	0	0	105	75	90	31.93	85	0	0	4.75	45.9	6.44	3.13	1.29	0.96	2.37	2.17
2	52	4	1	2	1	0	0	145	95	90	27.47	81	0	0	4.64	55.5	3.75	3.13	1.7	0.93	2.29	2.2
2	48	3	1	2	0	0	0	115	75	87	36.68	84	0	0	4.81	57.5	4.31	3.13	1.74	0.97	2.01	2.16
1	53	4	1	2	0	0	0	110	70	77	23.73	92	0	0	6.21	62	6.4	3.13	1.81	0.97	2.18	2.16
2	52	4	1	2	1	0	0	125	85	93	27.27	76	0	0	5.52	51.5	4.22	3.13	2.07	0.77	2.58	2.36
2	50	4	1	2	0	1	0	105	65	86	24.75	81	0	0	4.73	45.7	5.1	3.13	2.1	1.05	1.84	2.08
2	60	5	1	2	1	0	0	155	85	72	21.93	94	0	0	4.25	60.8	5.78	3.13	2.2	1.15	1.89	1.98
2	58	4	1	2	1	0	0	115	85	88	26.75	74	0	0	3.95	60.2	3.36	3.13	2.53	0.8	2.33	2.33
2	66	5	1	2	1	0	0	140	95	104	26.22	68	0	0	8.96	52.2	4.59	3.13	2.84	0.77	2.3	2.36
2	63	5	1	2	1	1	0	115	75	87	23.31	84	0	0	6.89	71.1	4.71	3.13	2.86	0.72	2.49	2.41
1	69	5	2	2	1	0	1	125	85	107	31.63	92	0	0	11.96	59	3.51	3.13	3.84	0.74	2.08	2.39
2	48	3	1	2	0	0	0	100	55	86	23.42	67	0	0	4.83	37.4	2.83	3.14	0.11	1.03	2.34	2.11
2	58	4	1	2	0	0	0	105	60	70	22.81	80	0	0	4.17	36.3	4.4	3.14	0.35	0.98	2.37	2.16
2	44	3	2	2	0	0	0	95	60	71	22.94	88	0	0	4.87	33.7	3.58	3.14	0.5	1	2.25	2.14
2	65	5	1	2	0	0	0	115	65	106	31.98	81	0	0	5.37	42.2	6.2	3.14	0.54	0.91	2.54	2.23
1	56	4	1	3	1	0	0	135	95	107	30.11	78	1	0	3.94	64.1	4.8	3.14	0.55	0.99	2.59	2.15
2	59	4	2	2	0	0	1	115	75	105	27.59	82	0	0	5.19	49.2	5.25	3.14	0.65	0.94	2.17	2.2
2	66	5	1	2	0	0	0	125	75	88	20.36	81	0	0	4.73	34.9	3.52	3.14	0.68	0.92	2.44	2.22
2	56	4	1	2	0	0	0	125	75	95	25.39	91	0	0	5.68	50.8	4.75	3.14	0.68	1.12	1.99	2.02
1	69	5	1	2	1	0	0	125	85	97	23.81	76	0	0	4.12	70	5.39	3.14	0.69	1.06	2.27	2.08
2	54	4	1	2	1	0	0	130	75	70	19.72	77	0	0	3.97	51.2	3.12	3.14	0.72	1.04	2.02	2.1
2	52	4	3	2	0	0	0	95	65	85	24.88	84	0	0	4.82	39.4	4.58	3.14	0.76	1.07	2.11	2.07
2	47	3	1	2	0	0	0	110	75	89	30.04	84	0	0	4.04	39.5	4.43	3.14	0.78	0.95	2.39	2.19
2	59	4	2	2	0	0	0	95	65	84	25.44	76	0	0	4.22	49.9	4.69	3.14	0.82	1.04	2.13	2.1
2	48	3	1	2	0	0	0	115	75	76	20.24	74	0	0	4.9	37.7	4.72	3.14	0.82	1.09	2.03	2.05
2	58	4	1	2	0	0	0	125	75	83	22.07	87	0	0	4.88	48.7	3.88	3.14	0.95	1	2.04	2.14
1	49	3	1	2	0	0	0	105	65	62	26.03	68	0	0	4.31	60.3	4.67	3.14	0.98	0.94	2.34	2.2
1	72	6	1	2	1	0	0	135	85	98	30.09	63	0	0	5.05	57.7	7.64	3.14	1.05	0.94	2.32	2.2
1	69	5	1	2	1	0	0	135	75	98	23.12	80	0	0	5.54	50	4.34	3.14	1.07	1.23	1.54	1.91
1	68	5	1	2	1	0	0	140	85	95	25.72	68	0	0	5.56	101.3	9.23	3.14	1.1	0.99	2.17	2.15
2	55	4	1	2	0	0	0	115	65	100	27.19	64	0	0	4.96	40.6	2.9	3.14	1.11	0.93	2.24	2.21
1	69	5	1	2	0	0	0	115	75	94	25.32	73	0	0	4.13	38.3	3.12	3.14	1.18	0.85	2.48	2.29
2	67	5	1	2	0	0	0	105	70	90	30.73	72	0	0	7.04	44.8	3.88	3.14	1.2	0.76	2.62	2.38
1	54	4	1	2	1	0	0	115	80	91	24.22	74	0	0	4.9	63	6.57	3.14	1.25	0.99	2.44	2.15
2	50	4	1	2	0	0	0	95	65	108	35.2	99	0	0	5.48	34.2	4.36	3.14	1.27	1.02	2.39	2.12
1	56	4	1	2	0	0	0	115	75	81	21.41	84	0	0	4.2	65.6	5.73	3.14	1.32	0.94	2.21	2.2
2	50	4	2	2	0	0	0	105	75	103	35.34	81	0	0	5.26	27.4	4.55	3.14	1.44	0.78	2.65	2.36
1	52	4	1	2	0	0	0	85	55	80	23.44	80	0	0	4.5	58.5	7.43	3.14	1.5	0.6	0.2	2.54
1	47	3	1	2	0	0	0	120	65	96	28.4	71	0	0	4.07	87.8	3.64	3.14	1.69	0.91	2.19	2.23
2	54	4	1	2	1	0	0	140	75	83	23.24	76	0	0	6.44	47.9	4.55	3.14	1.77	0.96	2.35	2.18
2	47	3	1	2	1	0	0	105	85	77	21.45	90	0	0	4.27	45.4	4.29	3.14	1.92	0.87	2.33	2.27
2	55	4	2	2	0	0	0	130	75	97	24.54	70	0	0	5.13	42.3	3.77	3.14	2.04	0.99	1.96	2.15
1	51	4	1	2	0	0	0	95	60	100	23.41	88	0	1	4.64	65.1	3.2	3.14	2.36	1.02	1.86	2.12
1	68	5	1	2	0	0	0	125	75	101	26.9	57	0	0	4.73	138.2	7.97	3.14	2.7	0.81	2.42	2.33
1	70	6	2	2	0	0	0	115	75	87	22.6	86	0	0	4.42	73.5	5.63	3.15	0.53	0.89	2.26	2.26
1	50	4	1	2	0	0	0	95	65	85	22.19	71	0	0	4.11	53.6	3.35	3.15	0.65	0.96	2.34	2.19
2	67	5	1	2	1	1	0	115	80	104	27.82	72	0	0	4.69	49.6	4.75	3.15	0.66	0.99	1.96	2.16
1	57	4	1	2	1	0	0	135	85	98	25.99	79	0	0	4.57	99	7.48	3.15	0.67	1.03	1.73	2.12
1	61	5	3	2	0	0	0	105	75	74	18.99	80	0	0	4.28	60.4	5.52	3.15	0.68	1.1	2.1	2.05
1	47	3	2	2	0	0	0	105	75	104	30.48	70	0	0	4.73	66.7	4.58	3.15	0.74	0.87	2.61	2.28
2	48	3	1	2	0	0	0	115	65	76	26.94	74	0	0	4.69	46.9	4.01	3.15	0.78	1.1	2.04	2.05
1	53	4	1	2	1	0	0	120	80	86	28.48	81	1	1	4.25	62.7	5.3	3.15	0.8	0.98	2.35	2.17
1	49	3	1	2	0	0	0	110	65	102	32.39	92	0	0	4.18	55	4.54	3.15	0.8	0.98	2.38	2.17
1	66	5	1	3	0	0	0	110	65	89	22.22	84	0	0	5.6	60.1	6.05	3.15	0.84	1.01	2.22	2.14
2	58	4	1	2	0	0	0	120	70	80	19.82	65	0	0	5.18	40.4	4.11	3.15	0.86	0.94	2.05	2.21
2	53	4	1	2	1	0	0	115	85	96	30.26	81	0	0	4.22	46.5	6.07	3.15	0.89	0.96	2.38	2.19
1	55	4	1	2	0	0	0	115	75	88	24.82	65	0	0	4.44	56.5	3.75	3.15	0.89	0.99	2.34	2.16
2	66	5	1	3	0	0	0	105	60	105	28.55	66	0	0	5	44.8	4.07	3.15	0.97	0.93	2.27	2.22
2	49	3	1	2	0	0	0	115	75	89	30.39	83	0	0	4.38	49.4	3.51	3.15	0.98	1.03	2.12	2.12
2	60	5	1	3	0	0	0	115	75	80	18.55	98	0	0	4.62	52.5	3.61	3.15	1.03	0.95	2.38	2.2
1	68	5	2	2	1	0	0	115	75	92	25.95	92	0	0	4.17	56.8	8.46	3.15	1.12	0.87	2.37	2.28
2	59	4	1	2	0	0	0	95	60	80	20.25	89	0	0	4.87	58.1	6.15	3.15	1.13	0.94	2.08	2.21
2	48	3	1	2	0	0	0	115	65	97	28.63	90	0	0	8.02	46.9	5.3	3.15	1.14	0.95	2.46	2.2
2	53	4	1	2	1	0	0	135	85	88	23.12	74	0	0	4.7	47.2	4.68	3.15	1.16	1.14	1.99	2.01
2	45	3	2	2	0	0	0	115	75	96	30.36	76	0	0	6.41	59.9	4.56	3.15	1.17	0.88	2.34	2.27
1	51	4	2	2	0	0	0	125	75	92	27.66	70	0	0	3.95	58.6	3.08	3.15	1.2	0.97	2.17	2.18
2	55	4	1	2	1	0	0	145	90	94	29.48	82	0	0	5.15	51	4.31	3.15	1.22	0.95	2.22	2.2
2	48	3	2	2	0	0	0	95	65	92	29.97	85	0	0	3.98	52.3	3.33	3.15	1.27	0.92	2.5	2.23
1	50	4	1	2	0	0	0	115	75	92	23.95	79	1	1	4.35	49	3.7	3.15	1.33	1.06	2	2.09
1	63	5	1	2	1	0	0	125	85	78	24.91	70	0	0	4.04	69.2	3.96	3.15	1.35	0.87	2.49	2.28
2	62	5	1	2	0	0	0	95	65	96	29	84	0	0	4.31	46.6	6.27	3.15	1.39	1.13	1.9	2.02
1	50	4	1	2	1	0	0	125	85	107	31.02	80	0	0	5.25	60.8	4.76	3.15	1.41	0.92	2.42	2.23
1	61	5	1	2	1	0	0	125	85	97	24.39	61	0	0	5.18	58.3	4	3.15	1.44	0.84	2.14	2.31
2	57	4	1	3	1	0	0	115	75	103	32.87	77	0	0	4.41	39.9	4.48	3.15	1.46	0.93	2.35	2.22
2	70	6	1	2	1	0	0	135	95	107	26.71	94	0	0	6.55	45	4.43	3.15	1.81	0.86	2.05	2.29
2	56	4	1	2	0	0	0	105	75	85	24.77	68	0	0	4.88	48.4	3.57	3.15	1.82	0.86	2.14	2.29
1	50	4	1	2	1	0	0	115	75	100	34.96	90	0	0	5.14	75.9	5.06	3.15	1.87	0.97	2.16	2.18
2	55	4	1	2	0	0	0	95	60	81	23.07	84	0	0	5.35	48.8	6.71	3.15	1.96	0.97	2.22	2.18
1	56	4	1	2	1	0	0	125	85	92	24.8	78	1	1	5.12	72.3	3.93	3.15	2.16	1.09	1.87	2.06
2	51	4	1	2	0	0	0	98	60	73	24.89	65	0	0	4.72	50.1	7.58	3.16	0.3	1.11	2.07	2.05
1	61	5	1	2	1	0	0	145	85	110	33.25	68	0	0	4.88	73	6.59	3.16	0.35	1.13	1.69	2.03
2	52	4	1	2	0	0	0	115	65	98	29.73	78	0	0	4.95	68	4.41	3.16	0.55	1.19	1.5	1.97
1	54	4	1	2	0	0	0	120	75	80	21.76	70	0	0	4.05	64.4	4.44	3.16	0.69	1.15	2.14	2.01
2	52	4	1	2	0	0	0	95	65	92	23.63	79	0	0	4.93	44.1	3.91	3.16	0.72	1.01	1.98	2.15
2	49	3	2	2	0	0	0	115	75	102	27.39	90	0	0	4.79	40.4	3.21	3.16	0.78	1.04	2.16	2.12
2	50	4	1	2	0	1	0	95	65	87	26.64	79	0	0	4.52	48.3	3.93	3.16	0.78	1.12	1.98	2.04
2	47	3	3	2	1	0	0	105	80	82	23.44	80	0	0	4.08	35.8	6.5	3.16	0.79	0.97	2.21	2.19
1	78	6	2	2	1	0	0	125	75	81	21.93	87	0	0	4.24	68.8	6.09	3.16	0.87	0.96	2.49	2.2
2	50	4	1	2	1	0	0	100	90	78	26.28	74	0	0	4.25	44.9	2.91	3.16	0.94	1.03	2.31	2.13
2	63	5	2	2	1	0	0	140	95	91	24.73	86	0	0	4.31	47.4	3.68	3.16	1.05	0.98	2.06	2.18
1	61	5	1	2	0	0	0	115	75	87	23.95	78	0	0	4.31	62.7	3.92	3.16	1.07	0.98	2.47	2.18
2	68	5	1	3	0	0	0	120	75	92	26.27	78	0	0	4.46	60	3.98	3.16	1.15	0.95	2.48	2.21
1	69	5	1	2	1	0	0	120	85	88	25.46	79	0	0	7.31	60.7	5.11	3.16	1.18	0.9	2.43	2.26
1	53	4	1	2	0	0	0	115	70	94	26.67	74	0	0	4.91	56.3	3.95	3.16	1.18	0.91	2.48	2.25
2	46	3	1	2	0	0	0	90	60	84	21.64	72	0	0	4.8	43.1	2.82	3.16	1.22	1.07	2.07	2.09
2	60	5	1	2	1	0	0	130	85	91	23.63	84	0	0	4.45	40.8	3.6	3.16	1.24	0.95	2.24	2.21
2	57	4	1	2	1	0	1	145	95	100	26.71	85	0	0	4.33	124.1	9.89	3.16	1.28	1.04	2.05	2.12
1	49	3	1	2	1	0	0	115	75	77	24.02	87	1	0	5.05	52.4	4.57	3.16	1.3	0.94	2.25	2.22
2	62	5	1	3	0	0	0	85	55	75	19.38	82	0	0	4.4	65.7	8.51	3.16	1.41	1.04	2.14	2.12
2	62	5	1	2	1	0	0	115	65	80	29.84	89	0	0	4.95	50.3	5.19	3.16	1.52	0.9	2.33	2.26
1	59	4	2	2	1	0	0	115	75	107	29.73	84	1	0	11.33	82.3	3.29	3.16	1.86	0.88	2.6	2.28
2	53	4	1	2	1	0	0	130	75	103	27.83	75	0	0	6.09	43.2	3.27	3.16	1.95	0.84	2.39	2.32
1	47	3	2	2	1	0	0	125	80	103	29.76	61	0	0	4.65	64.4	4.51	3.16	2.39	0.87	2.04	2.29
2	50	4	1	2	0	0	0	90	60	80	24.44	79	0	0	4.44	54.7	4.89	3.16	2.45	0.86	2.14	2.3
1	60	5	1	2	1	0	0	150	95	104	30.08	89	0	0	7.99	53.2	2.65	3.16	2.82	0.8	2.37	2.36
2	53	4	1	2	0	0	0	115	75	113	34.89	84	0	0	6.64	60.7	2.82	3.16	3.54	0.8	2.19	2.36
1	57	4	2	2	1	0	0	115	70	100	25.65	86	0	0	4.68	49.5	3.14	3.17	0.46	0.96	2	2.21
1	69	5	1	2	1	0	0	115	75	92	25.34	80	0	0	4.49	58	4.22	3.17	0.73	0.94	2.38	2.23
2	67	5	1	2	0	0	0	95	65	100	28	80	0	0	4.52	42.2	3.95	3.17	0.76	1.08	2.25	2.09
2	47	3	1	2	1	0	0	130	80	87	29.94	96	0	0	4.35	62.4	6.48	3.17	0.76	0.93	2.39	2.24
1	53	4	1	2	1	0	0	145	95	92	26.49	82	0	0	4.72	54	6.45	3.17	0.78	0.94	2.39	2.23
1	63	5	1	2	0	0	0	100	75	102	32.46	95	0	0	5.61	58.5	5.19	3.17	0.79	0.95	2.68	2.22
1	56	4	1	2	0	0	0	120	75	70	19.38	100	0	0	5.99	65.4	4.36	3.17	0.79	0.86	2.63	2.31
1	74	6	1	2	1	0	0	95	50	70	21.78	90	0	0	6.62	63.6	6.59	3.17	0.86	1.07	1.91	2.1
1	53	4	1	2	1	0	0	125	85	92	28.91	88	0	0	4.2	52.4	6.39	3.17	0.91	0.94	2.53	2.23
2	62	5	2	3	1	0	0	115	75	82	25.8	78	0	0	4.14	38.3	5.3	3.17	0.93	0.98	2.22	2.19
1	61	5	1	2	0	0	0	95	65	98	26.5	77	0	0	4.21	65	4.5	3.17	0.94	0.94	2.47	2.23
2	51	4	1	2	1	0	0	155	90	111	37.84	94	0	0	5.02	43.8	4.1	3.17	0.95	1.04	2.31	2.13
2	50	4	1	2	1	0	1	115	85	102	27.06	80	0	0	13.33	54	4.46	3.17	0.96	1.2	3.1	1.97
2	67	5	1	3	0	0	0	105	55	85	22.63	89	0	0	4.56	45.6	6.33	3.17	0.96	0.89	2.48	2.28
2	62	5	1	2	1	0	0	135	95	92	32.44	82	0	0	4.78	55.7	6.62	3.17	1	0.95	2.36	2.22
1	72	6	1	2	1	0	0	115	75	110	25.31	84	0	0	4.07	61.6	3.87	3.17	1.02	0.93	2.35	2.24
2	50	4	1	2	0	0	0	115	75	100	33.67	86	0	0	4.49	50.5	3.5	3.17	1.02	1.03	2.3	2.14
1	62	5	1	2	0	0	0	115	75	88	26.67	76	0	0	4.8	52	6.01	3.17	1.07	0.99	2.4	2.18
2	58	4	2	2	1	0	0	145	75	90	22.07	72	0	0	4.8	36.6	3.68	3.17	1.12	0.95	2.46	2.22
2	53	4	2	2	1	0	0	135	90	86	28.13	80	0	0	4.22	32.2	2.92	3.17	1.18	1.05	2.25	2.12
2	51	4	1	2	1	0	0	115	85	112	29.67	88	0	0	4.33	46.7	4.51	3.17	1.45	0.94	2.05	2.23
2	48	3	2	2	1	0	1	120	85	122	36.51	81	0	0	8.26	44.4	4.26	3.17	1.56	0.92	2.23	2.25
2	62	5	1	3	1	0	0	125	90	92	27.01	80	0	0	4.66	36.7	3.7	3.17	1.62	1	2.38	2.17
2	55	4	1	2	1	0	0	120	85	90	23.15	89	0	0	5.51	40.9	7.16	3.17	1.71	0.86	2.23	2.31
1	55	4	1	2	0	0	0	105	60	86	22.77	67	0	0	5.36	63.4	4.55	3.17	1.75	1.04	2.15	2.13
1	65	5	1	2	1	0	1	125	85	107	29.41	108	0	0	20.83	62.5	4.9	3.17	1.79	0.92	2.34	2.25
1	51	4	1	2	0	1	0	115	75	103	26.81	52	0	0	4.22	87	5.88	3.17	1.85	0.76	2.63	2.41
1	49	3	1	2	1	0	0	115	70	99	29.41	90	0	0	4.54	57.5	4.51	3.17	2.44	0.82	2.35	2.35
1	58	4	1	2	0	0	0	115	75	95	27.59	70	0	0	4.68	59.8	5.17	3.18	0.21	0.95	2.49	2.23
2	60	5	1	2	1	0	0	115	70	72	24.44	95	0	0	4.03	55.6	3.66	3.18	0.49	1.02	2.19	2.16
1	53	4	1	2	1	0	0	132.5	85	81	24.56	80	0	0	4.4	55.7	3.96	3.18	0.61	0.95	1.9	2.23
2	48	3	1	2	1	0	0	115	85	82	26.75	83	0	0	4.55	41.9	5.28	3.18	0.61	1.01	2.21	2.17
2	57	4	1	2	0	0	0	120	75	72	22.31	79	0	0	4.71	59.8	3.42	3.18	0.63	1.01	2.16	2.17
1	51	4	2	2	1	0	0	125	85	98	29.3	70	0	0	4.01	59.8	3.8	3.18	0.65	0.99	2.32	2.19
1	56	4	1	2	0	1	0	115	70	90	25.07	78	0	0	4.46	46	6.33	3.18	0.67	0.91	2.31	2.27
1	47	3	2	2	1	0	0	135	85	100	28.34	80	0	0	4.71	61.3	4.65	3.18	0.67	0.98	2.34	2.2
1	50	4	1	2	0	0	0	110	65	90	24.39	85	0	0	4.76	55.5	4.23	3.18	0.7	0.97	2.09	2.21
1	52	4	1	2	1	0	0	120	80	88	20.34	71	1	1	4.73	66.9	3.43	3.18	0.76	1.04	2.23	2.14
2	47	3	1	2	0	0	0	115	75	85	26.64	82	0	0	4.04	48.2	2.89	3.18	0.8	1.04	2.22	2.14
2	46	3	1	2	0	0	0	85	55	92	30.82	87	0	0	4.21	45.8	3.01	3.18	0.82	1.02	2.59	2.16
2	49	3	1	2	1	0	0	135	90	82	29.52	76	0	0	4.19	47.5	5.08	3.18	0.91	0.84	2.41	2.34
2	46	3	1	2	0	0	0	110	70	76	24.89	74	0	0	3.98	45.7	2.75	3.18	0.93	1.05	2.12	2.13
1	74	6	2	2	0	0	0	125	75	90	24.46	85	0	0	4.1	64.3	6.69	3.18	0.95	1.02	2.3	2.16
1	67	5	1	2	1	0	0	115	85	100	26.35	74	0	0	5.23	58.3	6.7	3.18	1	0.98	2.34	2.2
1	69	5	1	2	0	0	0	115	70	78	24.97	86	0	0	4.54	75.7	5.54	3.18	1.02	1.04	2.14	2.14
2	53	4	1	2	1	0	0	95	65	80	24.2	80	0	0	3.92	38.2	5.73	3.18	1.03	0.95	1.82	2.23
[truncated: 5,647 more rows]

## Sheet: 2023.
sex	age	education	Marital status	hypertension	CAD	diabetes mellitus	Systolic blood pressure	Diastolic blood pressure	Waist circumference	BMI	heart rate	smoking	drunking	Fasting plasma glucose	Serum creatinine	Blood urea nitrogen	TC	TG	HDL-C	LDL-C	non HDL-C
1	61	1	3	1	0	0	125	65	105	33.9844	79	0	0	5.74	48	5.23	1.1	0.56	0.92	0.95	0.18
2	85	1	3	0	0	0	125	80	80	20.7198	75	0	0	5.96	39.5	3.5	1.1	0.25	0.87	0.99	0.23
2	57	1	2	1	0	0	135	85	102	38.5802	95	0	0	4.08	21	4.81	1.16	0.13	0.8	0.7	0.36
2	68	1	2	0	0	0	125	80	88	24.4561	89	0	0	5.63	18.5	6	1.2	0.98	1	1.1	0.2
2	69	1	3	1	0	0	125	67.5	89	28.8889	80	0	0	4.2	45	4.3	1.2	1.6	1.03	1.1	0.17
1	49	2	2	0	0	0	125	85	92	23.6244	84	1	1	5.05	62.6	5.18	1.2	1.14	1.05	3.08	0.15
2	62	1	2	1	0	0	135	85	86	26.8386	100	0	0	6.21	21.6	5.2	1.2	0.98	0.7	1.2	0.5
1	71	1	2	0	0	0	125	75	87	24.9199	82	0	0	5.04	12.4	5.19	1.2	0.47	1.09	1.82	0.11
1	59	2	2	0	0	0	135	85	115	33.5146	80	0	0	4.38	47.2	4.34	1.2	1.37	1.09	2.91	0.11
2	70	1	2	0	0	0	125	75	103	22.1317	80	0	0	4.2	45	4.2	1.2	1.1	1.1	1.1	0.1
2	78	1	2	0	0	0	125	75	90	26.5239	80	0	0	4.9	45.5	4.2	1.2	1.1	1.1	1.1	0.1
1	72	2	3	0	0	0	130	75	90	24.1415	80	0	0	4.6	45	4.5	1.2	1.2	1.1	1.1	0.1
2	52	1	2	0	0	0	125	85	97	28.2284	76	0	0	6.35	10.5	5.2	1.2	0.98	1.1	0.98	0.1
2	79	1	3	1	0	0	125	75	90	20.3954	80	0	0	4.2	45.5	4.6	1.2	1.1	1.1	1.1	0.1
1	72	1	2	0	0	0	125	75	90	19.9219	80	0	0	4.8	45	4.5	1.2	1.3	1.1	1.6	0.1
1	68	1	2	0	0	0	135	85	90	23.6244	80	0	0	4.2	45	4.2	1.2	1.3	1.1	1.06	0.1
1	76	1	2	0	0	0	125	75	99	34.4496	80	0	0	4.6	45	4.2	1.2	1.1	1.1	1.2	0.1
2	64	1	2	0	1	0	105	75	98	28.9993	70	0	0	4.8	45	4.2	1.2	1.2	1.1	1.1	0.1
2	81	1	2	0	0	0	120	75	80	20.7198	80	0	0	4.2	45.2	4.2	1.2	1.3	1.1	1.1	0.1
1	84	1	2	0	0	0	125	75	89	25.5296	80	0	0	4.2	45.2	4.2	1.2	1.1	1.1	1.2	0.1
1	76	2	3	1	0	0	120	80	85	29.3848	87	0	0	4.5	30	2.3	1.2	2.1	1.1	1.2	0.1
2	78	1	3	1	0	0	125	75	70	29.4758	80	0	0	4.9	45.5	4.2	1.2	1.1	1.1	1.1	0.1
1	49	2	2	1	1	0	130	75	90	31.2314	85	0	0	4.2	11	3.6	1.2	0.2	0.7	0.5	0.5
1	62	1	2	1	0	0	105	65	103	26.4463	85	0	0	5.63	12.6	5.26	1.2	0.98	0.94	0.95	0.26
1	54	1	2	1	0	0	125	75	89	27.6601	84	0	0	5.35	45.2	6.2	1.2	0.98	0.87	1.2	0.33
2	64	1	2	0	0	0	100	70	92	32.0291	84	0	0	5.25	15.6	2.4	1.2	0.98	0.98	1.5	0.22
2	62	2	2	0	0	0	115	75	112	33.3333	80	0	0	5.63	15.6	4.2	1.2	0.98	0.98	1	0.22
2	48	1	2	0	0	0	115	75	108	30.3593	78	0	0	4.38	27.7	4.38	1.2	0.95	0.97	1.61	0.23
2	76	2	2	0	0	0	135	75	98	27.6787	71	0	0	6.35	45.2	2.3	1.2	0.98	0.8	1.2	0.4
2	77	1	2	0	0	0	110	60	75	19.8178	83	0	0	4.15	65	5.04	1.2	0.98	0.78	0.88	0.42
1	59	1	2	0	1	0	105	65	100	21.6296	80	0	0	5.25	25.3	5.24	1.2	0.98	0.98	1.2	0.22
2	62	2	3	1	0	0	125	90	102	27.1918	84	0	0	5.68	16.5	3.9	1.2	0.98	0.88	1	0.32
1	77	1	2	0	0	0	100	65	90	25.9516	82	0	0	5.63	35.2	5	1.2	0.98	0.98	1.2	0.22
2	70	2	2	0	0	0	115	75	92	25.7117	68	0	0	5.26	18.5	4.6	1.2	0.98	0.98	1.2	0.22
1	75	1	2	0	0	0	125	85	90	26.7229	82	0	0	4.98	41.9	4.59	1.22	0.84	1.13	1.39	0.09
1	63	2	2	0	0	0	115	85	99	31.4077	64	0	0	4.2	46	4.2	1.23	1.6	1.1	1.2	0.13
1	53	1	2	0	0	0	120	65	95	27.4756	85	0	0	5.65	63	4.72	1.24	0.15	1.1	0.59	0.14
2	53	1	2	0	0	0	105	65	107	26.5625	76	0	0	5.44	13.1	5.1	1.25	0.55	0.18	0.38	1.07
2	52	1	2	1	0	1	110	70	92	27.7671	84	0	0	4.65	30.3	4.51	1.25	1.15	1.19	2.53	0.06
2	59	1	2	1	0	0	135	95	109	32.4662	77	0	0	6.2	22	5.7	1.27	1.19	1.03	0.07	0.24
1	94	1	2	0	0	0	115	75	91	23.0469	74	0	0	5.57	68	5.35	1.28	0.14	0.17	0.76	1.11
2	76	1	3	0	0	0	125	75	65	21.6413	83	0	0	4.9	25	2	1.3	1.2	1	2	0.3
2	63	1	2	0	0	0	115	65	99	29.1545	80	0	0	4.2	45	4.3	1.3	1.6	1.03	1.1	0.27
2	70	1	3	1	0	1	115	65	90	20.7756	80	0	0	4.3	40	4.2	1.3	1.6	1.1	1.1	0.2
2	69	1	2	1	1	0	105	65	78	27.8159	87	0	0	4.6	45.5	4.3	1.3	1.2	1.1	1.1	0.2
1	68	2	2	0	0	0	125	75	90	28.8044	80	0	0	4.2	45	4.5	1.3	1.2	1.1	1.1	0.2
2	66	1	2	1	0	0	125	75	89	27.4077	80	0	0	4.8	45	4.3	1.3	1.6	1.1	1.2	0.2
2	65	1	3	1	1	0	125	85	99	31.0797	80	0	0	4.8	45	4.9	1.3	1.6	1.1	1.1	0.2
1	62	2	2	1	0	0	115	65	92	25.0657	80	0	0	4.2	45	4.2	1.3	1.2	1.1	1.1	0.2
1	68	1	2	1	0	0	125	75	98	25.4028	80	0	0	4.2	45	4.3	1.3	1.2	1.1	1.1	0.2
2	80	1	2	1	0	0	125	75	89	20.5049	80	0	0	4.2	45	4.2	1.3	1.2	1.1	1.2	0.2
1	82	1	2	0	0	0	125	70	98	26.3465	80	0	0	4.2	45	4.2	1.3	1.5	1.1	1.2	0.2
1	69	1	2	0	0	0	115	75	89	28.0277	80	0	0	4.2	45.2	4.2	1.3	1.6	1.1	1.2	0.2
1	85	1	2	0	0	0	135	85	92	21.7555	84	1	0	4.9	45	4.2	1.3	1.2	1.1	1.1	0.2
1	75	1	2	1	0	0	125	75	90	23.634	80	0	0	4.2	45	4.2	1.3	1.1	1.1	1.2	0.2
2	68	1	2	1	0	1	125	75	89	44.0771	80	0	0	4.9	45.5	4.8	1.3	1.2	1.1	1.1	0.2
1	76	2	3	1	0	0	125	80	93	21.7784	80	0	0	4.2	45	4.2	1.3	1.6	1.1	1.2	0.2
2	85	1	3	0	0	0	125	75	90	22.6562	80	0	0	4.2	45	4.2	1.3	1.6	1.1	1.2	0.2
1	62	1	2	0	0	1	115	85	88	21.875	82	0	0	4.8	45	4.2	1.3	1.5	1.1	1.1	0.2
1	81	1	2	1	0	1	115	70	90	26.1427	80	0	0	4.2	45	4.8	1.3	1.6	1.1	1.21	0.2
1	65	1	2	0	0	0	115	65	90	23.8754	80	0	0	4.2	45.5	4.3	1.3	1.3	1.1	1.3	0.2
1	69	1	2	0	0	0	115	65	90	24.5603	80	0	0	4.2	45.2	4.2	1.3	1.2	1.1	1.1	0.2
1	74	1	2	0	0	0	125	75	93	28.0404	80	0	0	4.9	45	4.9	1.3	1.2	1.1	1.1	0.2
1	70	1	2	0	0	1	115	70	93	24.1415	80	0	0	4.6	45	4.6	1.3	1.6	1.1	1.1	0.2
2	70	1	2	1	0	0	125	75	89	29.3575	80	0	0	4.9	45	4.3	1.3	1.2	1.1	1.3	0.2
2	63	1	2	0	0	0	120	65	93	22.6409	80	0	0	4.9	45	4.2	1.3	1.6	1.1	1.1	0.2
1	83	2	2	0	0	0	125	75	90	20.5693	80	0	0	4.2	45	4.3	1.3	1.6	1.1	1.2	0.2
1	60	1	3	0	0	0	115	75	67	21.9076	95	0	0	4.5	45.2	4.2	1.3	1.6	1.1	1.1	0.2
1	76	1	2	1	0	0	125	75	89	25.1559	80	0	0	4.2	45	4.6	1.3	1.2	1.1	1.2	0.2
1	67	1	2	0	0	0	125	75	90	26.2985	80	0	0	4.3	45	4.2	1.3	1.1	1.1	1.1	0.2
1	81	1	2	0	0	1	125	75	90	25.0657	80	0	0	4.8	45	4.2	1.3	1.3	1.1	1.3	0.2
1	77	1	2	1	1	0	125	70	93	27.1416	80	0	0	4.2	45.2	4.2	1.3	1.2	1.1	1.1	0.2
2	62	1	2	0	0	1	125	85	93	25.711	80	0	0	4.9	45	4.6	1.3	1.6	1.1	1.9	0.2
1	65	1	3	0	0	0	115	65	90	26.8544	80	0	0	4.2	45	4.9	1.3	1.2	1.1	1.1	0.2
1	85	1	3	0	0	0	125	75	90	24.3141	80	0	0	4.8	45	4.2	1.3	1.6	1.1	1.1	0.2
2	65	1	2	0	0	0	125	80	66	20.8117	81	0	0	4.3	40	4.2	1.3	1.3	0.6	0.3	0.7
2	76	1	3	1	1	0	120	80	80	24.653	80	0	0	4.2	45	4.2	1.3	1.2	1.1	1.1	0.2
2	73	1	3	0	0	1	115	70	90	19.3414	80	0	0	4.2	45	4.3	1.3	1.6	1.1	1.1	0.2
1	75	1	2	0	0	0	125	75	89	27.3588	80	0	0	4.2	45	4.3	1.3	1.2	1.1	1.1	0.2
1	55	1	2	0	0	0	125	75	98	25.5593	90	0	0	4.2	45	4.2	1.3	1.2	0.96	1.1	0.34
2	60	1	2	0	0	0	95	65	98	28.9993	84	0	0	5.4	12.5	3.2	1.32	0.95	1.22	1.87	0.1
2	58	1	2	1	0	0	135	105	94	24.2568	96	0	0	5.2	45	2.56	1.37	0.14	1.12	0.11	0.25
2	77	1	2	1	0	0	125	70	96	32.8614	80	0	0	4.2	45	4.6	1.4	1.1	1.1	1.3	0.3
2	62	1	2	1	0	0	125	75	100	30.2222	98	0	0	4.13	16.9	4.4	1.4	0.81	1.14	0.8	0.26
2	58	1	3	1	0	0	115	85	98	26.5731	79	0	0	6.35	32.2	5.2	1.5	0.98	1.2	1.58	0.3
2	63	1	2	1	0	0	125	80	88	23.8054	88	0	0	5.1	35	4.5	1.5	1.1	1.4	1.5	0.1
2	49	3	2	0	0	0	105	65	89	30.1194	84	0	0	5.65	16.3	5.1	1.57	1	0.88	1	0.69
1	63	1	2	0	0	0	125	70	88	21.5139	89	0	0	5.37	64	5.7	1.58	0.18	0.71	1.17	0.87
2	67	1	2	1	0	1	125	70	93	28.6048	80	0	0	4.2	45	4.2	1.6	1.2	1.03	1.3	0.57
2	83	2	3	0	0	0	115	65	69	17.6898	80	0	0	4.8	45	4.9	1.6	1.3	1.03	1.1	0.57
1	72	2	2	1	1	1	135	85	96	21.9671	80	0	0	4.2	45	4.2	1.6	1.2	1.1	1.1	0.5
1	81	1	2	0	0	0	125	75	90	26.4024	80	0	0	4.9	45	4.3	1.6	1.2	1.1	1.3	0.5
2	70	2	2	1	0	0	105	60	76	20.3428	84	0	0	4.2	45	4.2	1.6	1.3	1.1	1.2	0.5
1	72	1	2	1	0	1	125	75	93	21.9363	80	0	0	4.3	45	4.2	1.6	1.3	1.1	1.1	0.5
2	74	1	2	1	0	0	135	85	103	20.3333	80	0	0	4.2	45	4.2	1.6	1.2	1.1	1.3	0.5
2	72	1	2	0	0	1	130	85	93	33.7604	80	0	0	4.5	45	4.2	1.6	1.9	1.1	1.1	0.5
2	88	1	2	0	0	1	125	75	96	20	80	0	0	4.2	45	4.2	1.6	1.3	1.1	1.1	0.5
1	81	1	2	1	0	1	145	95	88	23.6652	82	0	0	4.8	45	4.2	1.6	1.5	1.1	1.1	0.5
2	66	1	2	0	0	0	125	75	90	18.4202	80	0	0	4.2	45	4.6	1.6	1.2	1.1	1.1	0.5
1	80	1	2	0	0	1	115	65	89	22.68	80	0	0	4.2	45	4.6	1.6	1.2	1.1	1.2	0.5
1	86	1	2	0	0	0	130	80	93	21.0962	80	0	0	4.5	45	4.2	1.6	1.3	1.1	1.1	0.5
2	73	1	2	1	0	1	115	65	98	34.1932	80	0	0	4.2	45	4.2	1.6	1.3	1.1	1.1	0.5
2	72	1	2	0	0	0	125	80	92	22.449	80	0	0	4.2	45	4.3	1.6	1.2	1.1	1.3	0.5
2	87	1	2	0	0	1	115	65	93	30.3593	80	0	0	4.2	45	4.2	1.6	1.2	1.1	1.1	0.5
2	73	1	2	0	0	1	115	70	103	24.4444	80	0	0	4.5	45	4.6	1.6	1.3	1.1	1.5	0.5
1	79	1	2	0	0	1	120	75	98	22.7615	80	0	0	4.8	45	4.2	1.6	1.3	1.1	1.1	0.5
2	88	1	2	1	0	0	115	65	80	24.3948	80	0	0	4.2	45	4.9	1.6	1.2	1.2	1.3	0.4
1	73	1	2	0	0	0	125	75	90	24.3141	80	0	0	4.8	45	4.2	1.6	1.3	1.3	1.1	0.3
1	65	1	2	1	0	0	135	85	80	25.0995	80	0	0	4.8	26.3	2.5	1.6	1.32	1.3	2.3	0.3
2	55	1	2	0	0	0	115	85	96	31.6242	75	0	0	8.05	46	2.74	1.61	0.65	0.93	0.43	0.68
1	57	1	2	1	0	1	135	75	81	24.281	76	0	0	8.41	42.2	3.67	1.61	0.55	1.2	1.2	0.41
1	70	1	3	1	0	0	135	75	106	24.5351	115	0	0	6.04	69	3.63	1.7	0.21	0.54	0.2	1.16
2	52	1	2	0	0	0	125	75	80	18.6709	76	0	0	4.82	77	4.4	1.72	0.1	0.22	0.16	1.5
2	49	1	2	0	0	0	125	85	102	23.7332	84	0	0	5.8	55	5.4	1.76	0.98	0.94	0.96	0.82
1	55	1	3	0	0	0	125	75	88	24.677	84	0	0	5.43	46.4	4.48	1.87	0.34	1.25	0.59	0.62
1	52	1	3	0	0	0	105	65	79	27.0258	82	1	1	4.23	72.7	3.7	1.88	0.51	0.99	0.87	0.89
2	71	2	2	1	0	1	125	75	93	21.6413	80	0	0	4.2	45	4.3	1.9	1.8	1.1	1.1	0.8
1	63	1	2	0	0	0	115	75	98	25.1486	80	0	0	4.2	40	4.3	1.9	1.3	1.1	1.3	0.8
2	70	1	3	1	0	0	115	65	98	20.5442	80	0	0	4.2	45	4.9	1.9	1.2	1.1	1.5	0.8
2	73	1	2	0	0	0	125	75	96	23.5556	80	0	0	4.8	46	4.2	1.9	1.2	1.1	1.5	0.8
2	62	1	2	1	0	1	115	75	96	23.0469	80	0	0	4.2	45	4.2	1.9	1.6	1.1	1.1	0.8
1	76	2	2	1	0	1	120	70	93	27.9431	80	0	0	4.2	45	4.6	1.9	1.6	1.1	1.1	0.8
1	83	1	3	1	0	0	130	85	80	22.5215	80	0	0	4.2	45	4.2	1.9	1.2	1.1	1.1	0.8
2	70	1	3	0	0	1	125	75	93	20.6612	80	0	0	4.8	45	4.9	1.9	1.6	1.1	1.8	0.8
2	71	1	3	0	0	0	127.5	75	96	20.1726	80	0	0	4.8	45	4.3	1.9	1.6	1.1	1.5	0.8
1	62	1	2	1	0	1	125	75	93	25.9695	80	0	0	4.2	45	4.3	1.9	1.2	1.1	1.1	0.8
1	64	1	2	1	0	0	115	70	93	21.7181	80	0	0	4.8	45	4.6	1.9	1.6	1.1	1.3	0.8
1	72	2	2	1	0	1	135	80	86	24.2123	80	0	0	4.8	45	4.2	1.9	1.6	1.1	1.2	0.8
1	78	1	2	1	0	0	135	85	80	26.8136	80	0	0	4.3	45	4.3	1.9	1.2	1.1	1.5	0.8
2	65	1	3	0	0	1	115	65	93	26.6193	80	0	0	4.8	45	4.2	1.9	1.6	1.1	1.3	0.8
2	65	1	2	0	0	0	115	75	106	26.0584	80	0	0	4.5	45	4.8	1.9	1.12	1.1	1.3	0.8
2	63	1	2	1	0	1	115	65	93	17.1029	80	0	0	4.9	45	4.6	1.9	1.6	1.1	1.2	0.8
2	74	1	2	0	0	0	125	75	90	24.0882	80	0	0	4.2	45	4.2	1.9	1.2	1.1	1.6	0.8
2	79	1	3	0	0	0	115	65	90	13.5808	80	0	0	4.5	45	4.5	1.9	1.6	1.1	1.32	0.8
1	67	1	2	1	0	0	115	65	92	21.4844	80	0	0	4.2	45	4.2	1.9	1.3	1.1	1.5	0.8
2	83	1	2	0	0	0	125	75	106	27.5862	80	0	0	4.2	45	4.6	1.9	1.3	1.1	1.1	0.8
2	76	1	2	0	0	0	115	70	90	24.064	80	0	0	4.2	45	4.2	1.9	1.3	1.1	1.2	0.8
1	78	1	3	1	0	1	120	65	93	22.4766	80	0	0	4.2	45	4.2	1.9	1.6	1.1	1.1	0.8
1	68	1	2	0	0	1	115	65	93	27.102	80	0	0	4.5	45	4.9	1.9	1.6	0.26	1.1	1.64
1	68	1	2	1	0	1	135	85	90	27.7767	80	0	0	4.9	45.2	4.2	1.9	1.3	1.2	1.1	0.7
1	62	1	2	0	0	0	125	75	96	25.4581	80	0	0	4.8	45	4.6	1.9	1.3	1.3	1.5	0.6
1	77	1	2	1	0	1	130	85	90	24.6097	80	0	0	4.2	45	4.2	1.9	1.3	1.3	1.1	0.6
1	73	1	2	1	0	0	125	80	89	24.6755	80	0	0	4.8	45	4.6	1.9	1.6	1.4	1.3	0.5
2	62	2	2	1	0	0	120	75	82	23.6013	86	0	0	5.9	36	2.5	1.9	0.5	1.5	2.5	0.4
2	63	1	2	0	1	0	135	75	89	30.3593	88	0	0	4.46	21.7	4.05	1.91	1.05	1.47	0.92	0.44
1	58	1	2	0	0	0	120	75	87	36.1604	88	0	0	5.08	42.6	7.52	1.92	0.67	1.18	0.77	0.74
2	50	2	2	0	0	0	95	65	88	32.8892	70	0	0	5.88	52	4.28	1.92	0.51	1.24	0.79	0.68
2	49	1	2	0	0	0	115	55	82	25.0399	82	0	0	4.22	13	5.26	1.92	0.57	1.35	0.4	0.57
1	68	2	2	1	1	0	135	85	108	28.9062	86	0	0	6.2	80	8.77	1.92	0.22	1.64	0.78	0.28
2	53	2	2	1	0	0	135	85	107	43.6629	84	0	0	5.15	11	3.09	1.94	0.47	1.55	0.26	0.39
1	54	1	2	0	0	0	105	65	96	33.7149	82	0	0	4.5	10.5	4.6	1.95	0.57	0.94	1.95	1.01
2	77	2	3	1	1	0	135	85	88	24.1217	80	0	0	5.4	23	5.6	1.97	0.32	0.89	0.55	1.08
1	56	1	2	1	0	0	135	85	78	24.6094	88	0	0	4.06	21.6	5	1.97	0.28	1.21	0.49	0.76
2	56	1	2	0	0	0	125	80	78	26.1249	84	0	0	4.64	41.8	4.91	1.97	1.04	1.23	1.56	0.74
2	52	1	2	0	0	0	120	85	97	31.2974	83	0	0	6.01	42	5.6	1.98	0.86	0.88	1.66	1.1
2	59	1	2	0	0	0	115	75	90	24.064	100	0	0	6.35	15.2	3.6	1.98	1.1	0.98	1.2	1
1	49	1	2	0	0	0	90	65	86	29.3575	85	0	0	5.63	16.3	4.2	1.98	1	0.88	1	1.1
1	60	1	2	1	0	0	135	65	107	38.3664	68	0	0	5.63	15.4	2.1	1.98	1.1	0.98	0.59	1
2	57	1	2	1	0	0	115	65	100	39.6379	86	0	0	6.32	45.2	6.35	2	0.98	0.78	1.2	1.22
2	49	1	2	0	0	0	105	75	84	27.0993	80	0	0	5.65	18.5	3.6	2	1.12	1	0.98	1
1	72	1	2	0	0	0	125	75	68	24.9199	85	0	0	4.3	26	3	2	2	1	2	1
1	72	1	2	0	0	0	125	75	62	20.5761	82	0	0	4.8	25	2	2	2	1	2	1
2	79	1	3	0	0	0	125	75	69	25.3906	80	0	0	4.7	26	30	2	1	1	1	1
2	64	1	2	0	0	0	125	75	63	26.7405	83	0	0	4.8	25	3	2	2	1	2	1
1	65	1	2	0	0	0	125	75	72	27.4714	81	0	0	4.6	26	2	2	1	1	2	1
2	54	1	2	0	0	0	115	75	98	30.4772	80	0	0	4.72	33.3	4.1	2	1.61	1.55	3.13	0.45
1	77	2	2	0	0	0	120	65	78	26.1719	78	0	0	5.57	45.4	4.83	2.01	1.41	1.29	1.81	0.72
2	50	1	2	0	0	0	115	75	78	22.5069	80	0	0	4	28.3	6.09	2.02	0.21	1.31	0.7	0.71
2	56	1	2	0	0	1	95	65	79	22.5069	77	0	0	5.95	17	5.16	2.03	0.13	0.39	0.38	1.64
1	57	1	2	1	0	0	125	70	85	25.2174	84	0	0	5.34	11.5	5.96	2.03	0.64	1.08	0.32	0.95
1	79	1	2	0	0	0	95	60	80	22.0386	83	0	0	4.89	22.8	4.41	2.03	1.25	0.96	1.16	1.07
1	63	1	2	1	0	0	145	85	98	29.3848	72	0	0	5.4	65	3.27	2.05	1	0.45	2.6	1.6
2	52	1	2	0	0	0	105	75	86	25.4524	69	0	0	5.19	20.5	5	2.05	0.37	1.68	1	0.37
2	58	1	2	1	0	0	110	75	84	20.8247	75	0	0	4.83	50	4.39	2.08	1.35	1.34	2.96	0.74
2	47	1	2	0	0	0	115	75	107	34.8899	69	0	0	5.42	48	4.23	2.08	0.55	0.95	0.94	1.13
1	65	1	2	1	0	0	125	75	93	28.6689	80	0	0	4.3	45	4.3	2.09	1.6	1.1	1.1	0.99
1	68	1	2	0	0	0	125	75	98	19.7777	88	0	0	4.46	27.9	3.79	2.09	0.4	1.34	0.49	0.75
2	57	1	2	1	0	0	125	65	98	29.6665	81	0	0	5.65	15.2	5	2.1	0.98	0.98	1	1.12
2	72	1	2	1	1	0	125	85	90	34.6667	80	0	0	4.2	45	4.9	2.1	1.2	1.06	1.3	1.04
2	52	1	2	0	0	0	130	85	100	28.9993	84	0	0	4.41	38.7	4.52	2.1	0.97	0.99	1.02	1.11
2	84	1	3	0	0	0	120	80	68	17.3484	88	0	0	4.2	40	3.1	2.1	1.2	1.1	1.3	1
2	72	1	2	1	0	0	125	70	89	25.1496	80	0	0	4.9	45	4.5	2.1	1.2	1.1	1.1	1
1	86	1	2	1	0	0	135	90	87	28.578	87	0	0	4.2	42	3.2	2.1	1.1	1.1	2.1	1
2	69	1	2	0	0	0	120	80	60	25.6312	85	0	0	4.5	25	3.2	2.1	1.5	1.1	1.3	1
2	62	2	2	0	0	0	122.5	82.5	70	25.3155	85	0	0	4.1	35	2.4	2.1	2.6	1.1	1.2	1
1	81	1	2	1	0	0	120	80	68	21.2183	88	0	0	4.1	30	3.1	2.1	1.3	1.1	1.2	1
2	66	1	2	0	0	0	125	87	89	22.3674	88	0	0	4.5	26	3.1	2.1	1.2	1.1	1.3	1
1	76	2	2	0	0	0	120	80	68	29.6427	88	0	0	3.4	30	3.2	2.1	2.1	1.1	1.2	1
2	50	1	2	0	0	0	125	70	98	21.3599	84	0	0	6.58	15.2	5	2.1	0.98	1.1	1.2	1
2	75	1	2	1	0	0	120	80	80	27.2096	87	0	0	4.6	30	3.1	2.1	1.2	1.1	1.3	1
2	81	2	3	0	0	0	120	82.5	80	32.4619	88	0	0	4.1	40	2.4	2.1	1.2	1.1	1.3	1
2	75	2	2	0	0	0	120	80	80	22.6562	88	0	0	4.4	40	3.2	2.1	1.2	1.1	1.2	1
2	53	1	2	0	0	0	120	85	89	29.6875	84	0	0	5.82	45.8	5.95	2.1	0.78	1.11	1.2	0.99
1	72	2	2	1	0	1	130	75	86	22.0386	85	0	0	4.41	46.6	5.03	2.1	0.87	1.16	1.93	0.94
2	61	1	2	0	0	0	125	65	93	37.9491	80	0	0	4.2	45.5	4.2	2.1	1.3	1.2	1.1	0.9
2	65	1	2	1	0	0	125	85	75	24.7768	88	0	0	4.1	35	3.4	2.1	2.3	1.2	1.6	0.9
2	58	1	2	1	0	1	125	70	99	25.7812	88	0	0	4.68	43.8	4.33	2.1	0.87	0.98	1.1	1.12
2	72	1	2	0	0	0	125	75	80	21.9261	80	0	0	4.2	45	4.2	2.1	1.2	1.3	1.3	0.8
1	64	2	2	1	0	0	125	85	80	29.9688	88	0	0	4.4	35	2.3	2.1	3.4	1.3	2.1	0.8
1	51	2	2	1	0	0	135	75	95	28.0816	84	0	0	4.45	50	4.89	2.1	1.61	0.99	2.42	1.11
2	55	1	2	0	1	0	125	75	84	24.0238	82	0	0	4.77	50.9	4.87	2.1	1.04	1.65	1.67	0.45
1	52	1	2	0	0	0	125	65	98	19.2653	78	0	0	4.4	55.2	3.2	2.11	0.94	0.87	1.36	1.24
2	57	1	2	1	0	1	125	65	115	29.0174	81	0	0	5.71	38	4.66	2.15	0.53	0.87	1.55	1.28
1	59	1	2	0	0	1	110	75	84	24.4418	85	0	0	9.38	41.1	4.4	2.16	0.77	0.71	1.3	1.45
1	60	1	2	1	1	0	130	75	110	34.3125	84	0	0	4.58	49.6	6.71	2.16	2.65	0.66	1.09	1.5
2	67	1	2	0	0	0	125	75	100	28.9062	84	0	0	4.6	49.6	6.71	2.16	2.65	0.66	1.09	1.5
2	53	1	2	0	1	0	120	75	108	28.3987	60	0	0	5.8	14.5	5.72	2.17	0.87	1	1.33	1.17
1	49	1	2	0	0	0	125	70	98	30.8594	79	0	0	4.32	43.7	5.84	2.17	0.31	1.18	0.8	0.99
1	69	1	2	0	0	0	125	70	102	26.2222	68	0	0	6.03	53.1	3.23	2.18	0.78	0.81	1.41	1.37
2	67	1	2	1	0	0	135	85	100	32.8731	80	0	0	4.76	77.7	6.23	2.18	1.58	0.73	1.32	1.45
1	60	3	2	0	0	0	115	70	93	26.398	84	0	0	4.76	77.7	6.23	2.18	1.58	0.73	1.32	1.45
1	50	2	2	1	0	0	125	65	86	27.5873	84	0	0	4.7	58.2	7.03	2.19	1	1.22	1.2	0.97
2	74	1	3	0	1	0	125	75	69	31.3912	83	0	0	5.2	45	4.2	2.2	1.3	1	1.3	1.2
2	75	1	2	1	0	0	125	75	90	24.6548	80	0	0	4.62	36.4	4.82	2.2	1.54	1.1	1.45	1.1
2	54	1	2	0	0	0	95	65	78	23.1473	88	0	0	4.5	56.3	5.7	2.2	1.42	1.19	1.97	1.01
1	73	2	2	0	0	0	135	75	95	26.1719	78	0	0	4.6	27	3.1	2.2	1.1	1.2	1.2	1
2	67	1	3	0	0	1	125	75	96	21.1702	76	0	0	5.5	12.1	3.2	2.2	1.23	1.21	1.88	0.99
2	75	1	3	0	0	0	130	75	84	23.9621	84	0	0	5.4	12.2	3.1	2.2	0.87	1.22	1.84	0.98
1	54	2	2	0	0	0	115	75	94	22.6562	84	0	0	4.3	75.3	4.8	2.2	1.36	1.37	1.14	0.83
1	75	1	2	1	0	0	135	85	103	28.3266	67	0	0	6.35	45.6	2.2	2.2	0.98	1.4	0.99	0.8
2	48	1	2	0	0	0	125	85	87	23.4952	80	0	0	4.26	38	3.86	2.2	1.45	1.57	2.36	0.63
1	48	2	2	0	0	0	115	75	84	21.8871	88	1	0	4.11	50.7	4.93	2.2	0.98	0.78	1.31	1.42
2	70	2	2	0	0	1	105	75	92	25.1096	89	0	0	5.4	12.5	3.2	2.21	1.14	1.22	1.87	0.99
2	71	2	2	1	1	0	155	95	119	34.0176	84	0	0	4.84	55	6.35	2.22	0.61	1.02	1.25	1.2
1	52	2	2	0	0	0	115	65	92	25.6312	80	0	0	5.71	63	5	2.23	0.17	0.77	0.82	1.46
2	48	2	2	0	0	0	100	65	82	20.9572	84	0	0	5.53	35.9	3.2	2.24	0.31	1.01	1.3	1.23
2	54	1	2	1	0	1	125	85	104	28.6215	88	0	0	5.7	69	3.79	2.24	0.86	1.61	1.07	0.63
1	63	1	2	1	0	1	115	75	91	24.1633	84	0	0	4.6	54.8	5.37	2.25	0.82	0.91	1.31	1.34
2	50	1	2	0	0	0	115	75	74	24.0346	76	0	0	4.18	41.8	2.52	2.26	1.28	0.94	0.96	1.32
1	50	1	2	0	0	0	140	75	86	25.7657	85	0	0	5.03	24.36	5	2.28	0.98	0.98	1	1.3
1	58	1	2	0	0	0	115	75	104	25.3515	82	0	0	4.26	79.5	5.2	2.29	0.95	0.88	1.43	1.41
2	59	1	3	1	0	0	125	85	112	35.8408	92	0	0	4.57	27.7	4.14	2.29	1.23	1.78	1.41	0.51
1	69	1	2	0	0	0	135	75	84	26.8977	80	0	0	4.8	26.3	3.2	2.3	1.1	1	1.1	1.3
2	49	1	2	1	0	0	105	65	119	40.7908	82	0	0	5.48	12	4.5	2.3	1.2	1.03	2.87	1.27
2	55	1	2	1	0	0	115	75	98	27.993	84	0	0	4.25	38.2	3.48	2.3	1.46	0.76	1.28	1.54
1	85	1	2	0	0	1	135	85	88	22.2063	80	0	0	4.2	46	4.2	2.3	1.3	1.1	1.2	1.2
2	62	1	2	0	0	0	130	85	90	27.2763	84	0	0	4.2	45	4.2	2.3	1.3	1.1	1.2	1.2
1	71	1	2	1	0	1	125	65	90	24.5243	81	0	0	4.2	42	4.3	2.3	1.3	1.1	1.2	1.2
1	77	2	3	1	0	0	120	80	95	19.563	85	0	0	4.6	36	3.1	2.3	1.1	1.1	2.1	1.2
2	68	1	2	1	0	0	130	75	90	25.2081	80	0	0	4.7	26.3	3.5	2.3	1.3	1.1	1.3	1.2
1	100	1	2	0	0	0	125	75	68	15.3894	83	0	0	5.2	65	4.6	2.3	1.1	0.9	1	1.4
2	71	1	2	0	0	1	125	75	106	26.5021	90	0	0	4.2	40	4.2	2.3	1.3	1.2	1.3	1.1
1	65	1	2	1	1	0	115	65	93	26.2222	80	0	0	4.6	46	4.2	2.3	0.3	0.3	1.3	2
1	77	1	2	1	0	1	115	70	89	25.721	80	0	0	4.2	45	4.6	2.3	1.6	1.3	1.1	1
2	67	1	2	0	0	0	125	75	98	20.9321	80	0	0	4.9	45	4.2	2.3	1.36	1.3	1.6	1
1	63	1	2	0	0	0	120	60	90	25.3155	80	0	0	4.9	45.2	4.6	2.3	1.2	1.3	1.1	1
2	73	1	3	1	0	0	135	85	85	26.4855	80	0	0	4.7	26.3	3.2	2.3	1.3	1.3	1.5	1
1	72	1	3	1	0	0	125	75	75	20.061	78	0	0	4.6	25.3	3.1	2.3	1.3	1.3	1.5	1
2	70	1	2	0	0	0	125	80	97	26.4855	80	0	0	4.9	46.5	4.2	2.3	1.6	1.3	2.3	1
2	75	1	3	0	0	0	125	75	89	25.1486	80	0	0	4.2	45	4.2	2.3	1.2	1.3	1.1	1
2	68	1	3	0	0	0	125	80	85	25.711	78	0	0	4.8	32	3.5	2.3	1.5	1.5	2.3	0.8
2	49	1	2	0	0	0	125	90	116	32.4142	91	0	0	6.3	10.3	4.1	2.3	1.5	1.54	0.91	0.76
2	75	1	3	0	0	1	125	75	80	16.6468	80	0	0	4.2	45	4.2	2.3	1.3	1.6	1.2	0.7
2	75	1	2	0	0	0	130	70	89	25.6312	80	0	0	4.2	45	4.2	2.3	1.3	1.6	1.3	0.7
1	68	2	2	1	0	0	115	65	90	27.0416	80	0	0	4.2	45	4.2	2.3	1.2	1.6	1.1	0.7
2	81	1	3	0	0	0	125	75	90	16.5607	80	0	0	4.9	45	4.2	2.3	1.2	1.6	1.1	0.7
2	79	2	2	1	0	0	120	80	80	21.9289	88	0	0	4.5	36	3.1	2.3	1.2	2.1	1.3	0.2
1	58	1	2	0	0	1	120	75	90	31.6346	88	0	0	12.83	62.3	4.03	2.31	0.93	0.83	1.53	1.48
2	69	1	2	0	0	0	115	75	75	18.3143	74	0	0	5.05	15	6.78	2.31	1.09	1.38	3.03	0.93
2	50	1	2	0	0	0	130	80	114	34.6969	88	0	0	5.99	17	4.44	2.32	0.25	1.37	1.65	0.95
1	71	1	3	1	0	0	105	65	114	25.2595	64	0	0	4.64	139.5	9.83	2.33	0.76	0.83	1.52	1.5
2	51	2	2	1	0	0	145	115	101	35.4564	76	0	0	4.84	38.3	3.06	2.33	1.04	0.9	1.46	1.43
1	63	1	2	1	0	0	130	75	86	23.2335	87	0	0	4.4	67.5	5.33	2.34	0.97	0.93	1.34	1.41
2	72	1	3	1	0	0	135	85	78	26.4381	84	0	0	3.9	32.5	2.98	2.34	1.46	0.93	1.04	1.41
1	73	1	2	0	0	0	125	75	98	24.7475	84	0	0	5.39	81.3	5.45	2.34	1.19	1.48	1.69	0.86
1	53	1	2	0	0	0	115	65	89	29.6665	84	0	0	5.3	68.2	4	2.34	1.03	1.71	1.38	0.63
1	48	1	2	0	0	0	110	65	110	32.548	75	0	0	4.16	69.4	5	2.35	1.57	0.94	0.96	1.41
1	51	2	2	0	0	0	115	75	89	25.1486	84	0	0	4.03	57.5	4.77	2.35	1.31	0.88	1.28	1.47
1	60	1	2	0	0	1	135	75	94	26.5731	84	0	0	4.02	34.2	3.32	2.35	0.7	0.94	0.96	1.41
1	67	1	2	1	0	1	130	75	89	28.6288	85	0	0	12.82	50.2	5.02	2.36	1.16	0.75	1.45	1.61
1	57	1	2	1	0	0	150	85	117	31.2092	84	0	0	4.66	59	5.18	2.36	1.1	1.77	1.46	0.59
2	80	1	2	1	0	0	105	65	90	28.8523	80	0	0	4.2	45	4.3	2.37	1.2	1.6	1.1	0.77
1	64	1	2	0	0	0	125	65	100	21.2279	78	0	0	6.09	54	5.95	2.39	0.49	0.85	1.71	1.54
1	58	1	2	1	0	0	135	80	92	24.7768	79	0	0	4.12	68.6	4.99	2.39	1.49	1.69	1.56	0.7
1	83	1	2	1	0	0	125	85	70	28.306	85	0	0	4.4	30	2.4	2.4	1.3	1.1	1.98	1.3
1	84	2	2	0	0	0	125	85	70	23.0469	80	0	0	4.1	35	2.3	2.4	2.1	1.1	1.3	1.3
2	75	2	2	1	0	0	120	80	75	19.563	88	0	0	4.1	40	3.4	2.4	2.3	1.1	1.8	1.3
1	72	1	2	0	0	0	120	80	68	21.1553	80	0	0	4.4	40	3.4	2.4	1.3	1.1	1.2	1.3
2	68	1	2	0	0	0	120	80	78	21.4031	87	0	0	4.1	35	2.6	2.4	1.2	1.1	1.3	1.3
1	75	1	3	1	0	0	120	80	88	25.5937	88	0	0	4.1	30	3.1	2.4	1.2	1.1	1.2	1.3
2	69	1	2	0	1	0	125	85	70	24.7737	85	0	0	4.5	38	3.1	2.4	1.3	1.2	1.2	1.2
2	67	1	2	1	0	0	120	80	75	17.2111	85	0	0	4.6	30	3.5	2.4	1.2	1.2	2.1	1.2
1	65	2	2	0	0	0	125	85	70	21.8776	88	0	0	4.5	35	2.6	2.4	1.2	1.2	1.4	1.2
2	57	1	2	1	0	0	115	65	74	23.6304	86	0	0	4.33	45.8	6.88	2.4	1.06	0.91	0.94	1.49
2	68	1	2	0	0	0	125	85	70	27.8852	85	0	0	4.1	40	2.4	2.4	2.1	1.5	1.6	0.9
2	62	1	2	0	0	0	105	65	92	24.3232	68	0	0	4.72	42.8	5.45	2.4	0.92	1.54	2.49	0.86
1	76	1	2	1	0	0	125	70	97	27.6817	86	0	0	5.82	10	6.07	2.4	0.66	0.77	1.41	1.63
1	63	2	2	0	0	0	125	85	78	33.126	85	0	0	4.8	28	3.5	2.4	2.3	2	2.1	0.4
1	76	1	2	0	0	0	125	85	81	23.3355	84	0	0	4.25	87.3	6.12	2.4	1.18	2.1	1.6	0.3
2	62	3	2	0	0	0	120	82	86	35.7143	85	0	0	5	30	3.4	2.4	1.3	2.1	2	0.3
1	69	1	2	1	0	0	122.5	82	90	34.3125	85	0	0	4.1	30	3.4	2.4	1.2	2.1	1.3	0.3
2	51	1	2	0	0	0	135	75	95	25.6312	74	0	0	4.91	48.7	4.93	2.41	0.5	0.82	1.47	1.59
2	69	1	2	1	0	0	125	75	110	32.4661	81	0	0	13.5	49	2.79	2.41	0.17	0.97	0.81	1.44
2	53	2	2	0	0	0	110	75	86	29.6427	78	0	0	6.35	52.9	4.65	2.41	0.53	0.88	1.61	1.53
1	81	1	2	1	0	0	105	60	80	26.1286	80	0	0	4.43	31.4	4.75	2.41	1.56	0.94	1.32	1.47
2	57	1	2	0	0	0	105	75	90	24.5578	84	0	0	4.48	44.9	4.36	2.41	0.94	1.68	1.55	0.73
1	56	1	2	0	0	0	125	75	108	25.4581	88	0	0	4.39	57.4	5.89	2.42	1.15	1.2	1.02	1.22
1	48	1	2	0	0	0	100	65	95	28.0277	85	0	0	5.81	51	6.02	2.43	0.15	1	1.01	1.43
1	54	2	2	0	0	0	115	65	106	26.9531	64	0	0	4.57	56	4.71	2.43	0.77	0.87	1.53	1.56
1	55	1	2	1	0	0	105	65	110	30.7958	84	0	0	6.51	75.9	4.13	2.43	1.12	0.83	1.58	1.6
1	59	1	2	0	0	0	115	75	94	23.5304	88	0	0	5.81	56.3	4.21	2.43	1.15	0.89	1.64	1.54
1	53	1	2	1	0	0	115	65	94	19.0311	98	1	0	4.71	70.3	4.91	2.43	1.06	1.79	1.9	0.64
1	62	1	2	1	0	0	140	75	87	24.8591	75	0	0	4.59	54.5	3.91	2.44	1.17	1.07	1.31	1.37
2	51	1	2	0	0	0	115	55	86	21.1927	88	0	0	4.66	49.5	4.33	2.44	0.77	1.09	1.28	1.35
1	49	1	2	0	0	0	105	65	84	23.9188	74	0	0	4.7	53.5	3.63	2.44	1.07	0.65	1.47	1.79
2	53	1	2	1	1	0	135	95	82	28.6917	75	0	0	4.13	70.3	4.6	2.44	0.61	1.16	1.17	1.28
2	25	2	1	0	0	0	120	85	74	22.4766	84	0	0	4.67	40	4.08	2.44	0.63	0.9	1.29	1.54
1	70	2	2	0	0	0	110	70	96	32.3265	62	0	0	4.8	55.9	5.12	2.46	0.82	0.96	1.49	1.5
2	55	1	2	0	0	1	125	85	101	33.7604	88	0	0	7.82	31.7	3.7	2.46	1.23	0.9	1.19	1.56
1	61	1	2	0	0	0	125	75	92	20.984	87	0	0	4.86	41	3.54	2.46	0.93	0.86	1.51	1.6
1	71	1	2	0	0	0	115	75	84	21.3599	74	0	0	4.61	55.9	5.12	2.46	0.82	0.96	1.49	1.5
2	73	2	2	1	0	0	125	80	90	22.8625	80	0	0	4.34	55.3	4.08	2.47	0.96	0.9	1.2	1.57
1	65	1	2	0	1	1	105	65	97	26.1286	90	0	0	15.95	63.6	6.55	2.47	1.24	1.48	1.4	0.99
2	52	1	2	0	0	1	115	75	110	27.0552	85	0	0	5.61	78	3.58	2.48	0.16	1.09	1.64	1.39
2	52	3	2	0	0	1	90	60	94	21.6441	80	0	0	5.59	32	4.44	2.49	0.31	0.95	1.4	1.54
1	71	1	2	1	0	0	125	80	86	27.0416	84	0	0	4.16	57.9	3.13	2.49	1.7	1	0.78	1.49
1	57	1	2	0	0	0	115	75	84	25.4581	68	0	0	4.72	48.7	3.68	2.49	0.77	1.06	1.18	1.43
1	53	1	2	0	0	0	125	75	106	19.3772	78	0	0	4.68	50.3	6.2	2.49	1.32	0.92	1.68	1.57
1	57	1	2	1	0	0	130	80	86	20.8086	76	0	0	4.42	68.3	6.55	2.49	0.74	0.89	1.2	1.6
2	60	2	2	0	0	1	115	70	84	26.7094	80	0	0	12.45	36.4	3.99	2.49	0.72	0.67	1.68	1.82
2	63	1	2	1	0	0	130	85	84	23.5304	85	0	0	4.6	30	2.4	2.5	1.5	1	1.5	1.5
1	54	1	2	0	0	0	105	60	108	28.0816	95	0	0	4.23	25.3	4.5	2.5	0.97	0.92	0.95	1.58
1	51	1	2	0	0	0	115	75	114	35.629	84	0	0	4.1	67.1	5.23	2.5	1.43	1.11	1.37	1.39
1	57	1	2	1	0	0	125	80	104	29.0006	83	0	0	4.19	67.1	6.32	2.5	1.48	1.12	1.36	1.38
1	52	1	2	0	0	0	115	75	93	22.5069	84	0	0	4.37	43.9	5.48	2.5	1.42	1.17	2.81	1.33
2	55	1	2	0	0	0	105	75	105	21.6441	84	0	0	5.65	16.5	5.2	2.5	0.6	1.2	0.98	1.3
1	48	2	2	0	0	0	115	75	95	28.3937	84	0	0	4.8	87.8	5.8	2.5	1.43	1.2	1.43	1.3
2	53	1	2	0	0	0	95	65	90	23.3726	81	0	0	4.77	36.6	4.48	2.5	1.3	1.25	2.36	1.25
1	65	1	2	0	0	0	115	75	96	24.3375	87	0	0	5.7	30	3	2.5	1.5	0.5	1.5	2
1	70	1	2	0	0	0	120	75	75	21.3382	80	0	0	4.8	25.3	2.3	2.5	1.3	1.3	2.3	1.2
1	56	1	2	0	0	0	135	75	98	25.9909	84	1	1	4.42	66.3	5.02	2.5	1.3	1.36	1.31	1.14
1	73	1	3	0	0	0	115	70	83	26.7532	86	0	0	4.9	30	2.5	2.5	1.4	1.5	2.5	1
2	67	1	2	1	0	0	120	75	76	22.8269	86	0	0	5.9	35	3.6	2.5	0.5	1.5	2.6	1
1	67	2	3	0	1	0	115	75	82	19.6752	84	0	0	4.5	30	3	2.5	1.5	1.5	2.5	1
1	56	1	2	0	0	0	125	75	100	26.9531	81	0	0	4.18	45.4	3.36	2.5	1.26	1.5	2.54	1
2	52	2	2	0	0	0	125	75	83	24.064	92	0	0	5.79	56	1.67	2.51	0.36	1.46	0.89	1.05
1	49	2	2	0	0	0	135	75	93	24.4473	84	1	0	5.8	51	4.47	2.52	0.19	0.98	2.3	1.54
1	69	1	2	1	0	0	125	80	87	18.4425	87	0	0	5.2	15.3	4.94	2.52	0.88	1.14	2.49	1.38
1	68	1	2	1	0	0	145	85	94	27.0051	88	0	0	5.86	49.6	4.96	2.52	1.32	1.78	1.8	0.74
2	52	1	2	0	0	0	115	75	84	23.7253	88	0	0	5.88	34	4.48	2.53	0.52	0.87	1.78	1.66
2	51	1	2	0	0	0	115	75	68	24.4444	84	0	0	4.62	49	6.07	2.53	0.74	1.08	2	1.45
2	51	1	2	1	0	1	130	75	84	25.8876	83	0	0	13.22	27.2	4.91	2.53	1.21	1.2	1.2	1.33
1	65	1	2	1	0	0	120	65	102	20.4467	84	0	0	5.81	67.4	4.79	2.53	0.97	0.82	1.76	1.71
1	52	1	2	0	0	0	115	75	89	22.2041	84	0	0	3.91	50	3.87	2.53	1.57	0.81	1.46	1.72
1	54	1	2	0	0	0	115	75	98	37.1094	84	0	0	5.27	53.6	7.33	2.53	1.2	0.86	1.26	1.67
1	73	1	2	0	0	1	120	75	80	18.9619	88	0	0	5.27	74	3.35	2.54	0.26	0.94	1.46	1.6
1	48	1	2	0	0	0	90	65	88	25.5937	76	0	0	4.52	50.1	6.59	2.54	1.35	1.06	1.34	1.48
2	97	1	3	0	0	0	105	65	81	15.0356	72	0	0	4.29	24.5	4.56	2.54	0.47	0.94	0.95	1.6
1	49	1	2	0	0	0	125	65	98	20.061	81	0	0	4.63	46.4	3.16	2.54	1.61	1.6	1.24	0.94
1	67	2	2	0	0	0	120	75	94	22.46	84	0	0	4.92	54.5	5.01	2.54	1.21	0.7	1.67	1.84
1	62	1	2	0	0	0	130	75	80	23.1473	84	0	0	5.03	48.5	4.66	2.55	0.52	1.08	1.51	1.47
1	57	1	2	1	0	1	105	65	90	25.763	88	0	0	17.06	44.6	4.16	2.55	1.75	1.1	1.29	1.45
1	49	2	2	0	0	0	125	70	118	29.7619	64	0	0	3.99	64	5.2	2.55	0.49	1.61	1.71	0.94
2	61	1	2	1	0	0	120	80	78	24.8777	84	0	0	4.69	32.9	4.84	2.55	1.2	1.63	1.92	0.92
1	78	1	2	0	0	0	105	65	117	27.0169	87	0	0	5.41	59.4	6.12	2.55	1	1.77	1.43	0.78
2	71	1	2	1	1	0	135	87.5	90	24	80	0	0	5	51.8	7.41	2.56	0.28	0.92	1.49	1.64
1	51	1	2	1	0	0	115	75	93	30.7958	84	0	0	4.2	49.1	4.46	2.56	0.63	1.05	1.36	1.51
1	74	2	2	0	0	0	105	65	98	24.0238	84	0	0	4.3	53	4.76	2.56	1.12	0.88	1.42	1.68
1	57	1	2	0	0	0	115	75	82	22.1003	74	1	0	5.85	62	4.86	2.56	0.55	0.97	1.13	1.59
1	79	1	2	1	0	0	125	70	98	19.3698	84	0	0	6.25	25.6	6.25	2.56	0.98	0.8	2.3	1.76
1	67	1	2	1	0	0	105	65	96	29.0318	88	0	0	3.94	67.9	4.86	2.56	1.31	0.93	1.21	1.63
1	53	1	2	0	0	0	125	75	109	32.2708	80	0	0	4.27	52.1	5.3	2.56	0.81	1.76	1.74	0.8
1	67	1	2	0	0	0	105	65	86	23.0112	84	0	0	4.76	59.5	5.07	2.56	1.03	1.77	1.81	0.79
2	72	1	3	1	0	1	135	65	117	31.9576	98	0	0	3.97	58	6.86	2.57	1.39	1.01	1.44	1.56
2	52	2	2	0	1	0	120	65	90	27.2817	81	0	0	5.13	39.1	4.03	2.57	1.32	0.85	1.69	1.72
2	49	1	2	1	0	0	135	85	84	14.6516	90	0	0	5	11	8.4	2.57	1.02	1.29	2.73	1.28
1	85	1	3	0	0	0	145	80	84	24.1288	87	0	0	4.83	62.7	6.7	2.58	1.16	1.03	1.62	1.55
1	50	1	2	0	0	0	105	65	83	19.721	88	0	0	4.82	58	5.07	2.58	0.6	1.03	1.02	1.55
1	60	2	3	0	0	0	115	75	78	21.5045	88	0	0	5.64	87	5.63	2.58	0.58	0.85	0.85	1.73
2	64	1	2	0	0	0	105	75	75	20.1348	82	0	0	4.74	42.6	3.82	2.58	0.7	0.97	1.47	1.61
1	63	1	2	1	0	0	135	80	99	22.2656	74	0	0	4.49	57.7	6.68	2.58	1.3	0.89	1.9	1.69
2	60	1	2	1	1	0	125	75	82	22.9398	87	0	0	5.64	39.1	5.66	2.59	1.76	0.84	1.48	1.75
2	42	1	2	0	0	0	115	60	74	22.6562	84	0	0	5.2	45.2	4.2	2.6	1.03	0.3	1.2	2.3
1	57	1	3	0	0	0	95	60	92	20.4382	80	0	0	4.95	56.6	4.87	2.6	0.71	0.95	1.58	1.65
1	56	1	2	0	0	0	125	75	82	22.8624	92	0	0	5.04	62.7	4.97	2.6	0.32	0.96	1.47	1.64
1	51	1	2	0	0	0	115	60	98	24.623	88	0	0	4.28	73	5.7	2.6	0.7	1.2	1.1	1.4
1	75	1	2	0	0	0	120	75	90	24.2188	78	0	0	4.7	32.6	3.2	2.6	1.3	1.3	1.5	1.3
2	67	2	2	1	0	0	125	75	90	24.8358	80	0	0	4.9	45.2	4.9	2.6	1.1	1.3	1.6	1.3
2	80	1	2	1	0	0	127.5	87	75	22.6409	84	0	0	5.2	30	3.6	2.6	1.6	1.6	2.1	1
2	55	1	2	1	0	0	125	75	108	28.6726	90	0	0	4.95	54.9	3.82	2.61	1.55	1.04	1.52	1.57
1	62	1	2	1	0	0	120	80	92	27.8159	68	0	0	4.67	54.4	3.11	2.61	0.97	0.88	1.76	1.73
1	65	1	2	1	0	0	95	65	95	23.2254	66	0	0	5.24	53.7	6.5	2.61	0.87	1.81	1.26	0.8
1	54	1	3	0	0	0	95	65	82	19.2234	71	1	1	5.35	51	6.12	2.61	0.22	0.95	1.12	1.66
2	56	1	2	1	0	0	125	80	78	24.1415	80	0	0	6.01	67	6.35	2.62	1.1	0.98	1.46	1.64
1	57	2	2	0	0	0	125	75	108	31.6032	88	0	0	4.89	63	1.84	2.62	0.57	1.2	2.32	1.42
2	53	1	2	0	0	0	115	75	77	20.8889	66	0	0	5.21	37.1	5.25	2.62	0.81	0.91	1.61	1.71
1	53	1	2	0	0	0	115	65	104	25.0399	82	0	0	6.74	80	3.14	2.63	0.19	0.95	1.31	1.68
2	59	1	2	1	0	0	130	75	102	31.6118	92	0	0	16.59	32.8	5.8	2.63	1.87	0.87	1.61	1.76
1	49	2	2	0	0	0	115	75	89	29.0698	84	0	0	5.87	47.4	5.22	2.63	0.8	1.1	1.2	1.53
2	55	1	2	0	0	0	105	75	103	26.7094	84	0	0	4.82	45.3	5.36	2.63	0.97	0.9	1.71	1.73
2	67	1	2	0	0	0	125	80	88	19.1746	84	0	0	4.59	28.5	6.8	2.63	0.91	1.43	1.05	1.2
2	78	1	2	1	0	0	125	75	96	24.974	80	0	0	3.98	40.2	4.35	2.63	0.74	1.56	2.1	1.07
1	55	1	2	0	0	0	110	85	108	36.9321	65	1	0	4.82	60.1	3.08	2.63	1.08	1.81	1.38	0.82
1	53	1	2	0	0	1	105	65	93	27.1816	84	0	0	4.74	59.6	5.01	2.64	0.92	0.95	1.61	1.69
1	52	1	2	0	0	0	110	75	102	31.5115	84	0	0	3.98	53.7	4.57	2.64	0.78	1.2	1.2	1.44
2	54	1	2	1	1	0	135	75	95	26.4024	80	0	0	5.17	40.1	4.63	2.64	1.03	1.27	1.04	1.37
1	80	1	2	1	0	0	125	65	98	22.6003	77	0	0	4.96	59.9	6.78	2.64	0.81	1.72	1.78	0.92
1	73	1	2	0	0	0	115	70	90	22.0386	88	0	0	5.04	33.9	4.35	2.64	0.92	0.58	1.99	2.06
2	62	1	2	0	0	0	125	70	99	31.8287	81	0	0	4.65	36.4	4.8	2.65	0.24	0.92	0.94	1.73
1	53	1	2	0	0	0	135	75	89	23.3844	86	0	0	4.8	71.6	4.75	2.65	1.18	1.71	2	0.94
2	48	2	2	0	0	0	120	65	88	25.1532	80	0	0	4.96	51.9	4.2	2.66	1.33	1.25	0.25	1.41
1	69	2	2	0	0	0	135	75	78	20.3244	88	0	0	4.68	46.1	4.21	2.66	1.18	1.78	1.88	0.88
1	62	1	2	0	0	0	115	75	95	24.1288	82	0	0	4.76	64.6	5.85	2.66	1.28	1.82	2.02	0.84
2	58	1	2	0	0	0	105	65	75	17.5781	96	0	0	5.56	52	5.14	2.66	0.86	2.1	2	0.56
2	73	1	2	1	0	0	125	90	94	23.2834	90	0	0	5.76	12	4.6	2.67	1.21	0.91	0.16	1.76
2	55	1	2	0	0	0	115	60	75	19.433	87	0	0	4.87	55.3	3.1	2.67	0.63	0.94	0.96	1.73
2	84	1	3	1	0	0	135	85	97	31.5963	80	0	0	4.21	40	5.5	2.67	0.86	1.37	1.54	1.3
2	52	1	2	0	0	0	125	65	94	30.3593	80	0	0	4.92	43.2	4.72	2.67	1.03	0.94	1.57	1.73
1	52	2	2	0	0	0	125	75	110	28.3531	79	0	0	5.22	36.3	3.67	2.67	1.27	1.79	1.83	0.88
1	53	1	2	0	0	0	135	75	82	22.4088	84	1	0	4.34	58.5	5.68	2.68	1.44	1.13	1.58	1.55
2	59	1	2	1	0	1	105	75	80	27.9267	84	0	0	4.65	28.6	4.01	2.68	0.85	1.21	1.12	1.47
1	53	1	2	1	0	0	125	85	95	26.2188	71	0	0	4.77	86.6	4.09	2.68	0.83	0.93	1.4	1.75
1	55	1	2	1	0	0	95	60	109	24.4193	84	0	0	3.95	57.5	3.84	2.68	0.86	1.62	1.74	1.06
2	53	2	2	0	0	0	125	75	87	26.4072	78	0	0	4.41	26.2	6.73	2.68	1.67	1.67	1.07	1.01
2	71	1	2	1	0	0	135	90	76	19.025	88	0	0	4.66	43.6	4.82	2.69	0.74	1	0.74	1.69
1	75	1	2	1	1	0	105	65	77	22.1453	76	0	0	4.5	53.8	4.59	2.69	0.81	0.85	1.94	1.84
1	71	1	2	1	0	0	140	65	100	22.5896	65	0	0	3.9	62.7	3.68	2.69	1.42	1.15	1.39	1.54
1	52	2	2	0	0	0	125	65	100	23.1084	81	0	0	3.97	57.5	3.8	2.69	0.86	1.61	1.74	1.08
2	61	1	2	0	0	0	110	75	75	20.9321	84	0	0	6.8	50.4	4.29	2.69	1.03	1.68	1.76	1.01
1	52	1	2	0	0	0	115	75	80	21.4536	84	0	0	4.61	79.6	5.27	2.7	0.63	1.12	1.63	1.58
1	79	1	2	1	0	1	150	90	100	22.9398	80	0	0	4.59	56.6	5.34	2.7	0.87	0.92	2.03	1.78
2	71	1	3	1	0	0	115	65	90	23.0681	80	0	0	4.88	31	4.52	2.7	0.76	1.16	1.6	1.54
1	58	1	2	0	0	0	115	65	98	22.8329	81	0	0	4.32	58.9	5.22	2.7	1.23	0.99	1.47	1.71
2	51	2	2	0	0	0	110	75	84	27.3399	74	0	0	4.48	44.4	3.22	2.7	1.26	0.93	1.6	1.77
1	55	1	2	0	1	0	115	75	104	27.9431	69	0	0	4.48	65.8	5	2.7	1.06	0.72	1.73	1.98
2	79	1	2	0	0	0	115	75	80	20	86	0	0	4.56	37.1	3.96	2.71	1.43	1	0.7	1.71
1	59	1	2	1	0	0	115	75	96	28.6851	85	0	0	4.12	35.8	3.57	2.71	0.93	0.94	0.96	1.77
1	62	1	2	0	0	0	110	75	88	22.0386	76	0	0	4.87	63	4.56	2.71	0.7	0.87	1.47	1.84
2	53	2	2	0	1	1	105	65	106	27.9421	82	0	0	4.54	21	3.51	2.71	1.31	1.48	1.12	1.23
1	56	1	2	0	0	0	105	55	90	27.1809	109	0	0	4.66	65.1	5.16	2.71	1.12	1.68	1.59	1.03
1	49	1	2	0	0	0	120	80	86	23.0112	65	0	0	4.34	45.1	4.5	2.71	0.9	1.73	1.65	0.98
2	68	1	3	1	0	0	135	85	76	24.977	88	0	0	4.54	37.2	4.66	2.71	1.28	1.82	1.73	0.89
2	59	1	2	1	0	1	125	85	88	28.1943	84	0	0	4.39	35.7	5.1	2.72	0.89	1.01	1.7	1.71
2	54	1	2	1	1	0	110	65	107	27.9267	82	0	0	5.05	34.6	5.54	2.72	1.15	1.02	1.83	1.7
2	52	1	2	1	0	0	115	75	80	22.4813	80	0	0	4.5	69.1	5.97	2.72	3.18	0.79	1.3	1.93
2	61	1	2	1	1	0	115	75	95	26.0204	88	0	0	4.76	32	4.32	2.72	0.55	0.92	1.58	1.8
1	69	1	2	0	0	0	125	75	98	26.6667	80	0	0	4.85	42	3.06	2.72	0.7	0.94	1.36	1.78
1	52	1	2	0	0	0	105	65	110	26.8386	82	0	0	4.78	55.6	3.46	2.72	0.77	1.72	1.71	1
1	48	1	2	0	0	0	105	65	95	24.4561	84	0	0	4.78	53.9	4.7	2.72	0.89	1.73	2.01	0.99
2	70	1	2	1	0	0	125	90	68	21.8211	84	0	0	4.22	48.3	4.5	2.73	0.66	1.01	1.39	1.72
1	58	1	2	0	0	0	105	60	90	22.0386	64	0	0	4.18	63.9	6.27	2.73	1.06	1.03	1.49	1.7
1	68	1	2	1	0	0	115	70	72	23.2335	80	0	0	4.02	40.9	4.73	2.73	0.95	1.06	1.63	1.67
2	66	1	2	1	0	0	145	80	118	33.2031	86	0	0	5.35	45.7	4.51	2.73	0.7	1.16	1.16	1.57
1	56	1	2	1	0	0	115	75	86	22.5981	82	0	0	4.29	67.4	4.11	2.73	1.51	0.9	1.46	1.83
2	55	2	2	0	0	0	95	65	87	29.6173	84	0	0	4.74	45.8	5.48	2.73	0.56	1.42	1.26	1.31
2	56	1	2	1	0	0	105	75	90	23.4236	84	0	0	5.34	15.4	4.5	2.73	0.68	1.74	0.93	0.99
1	26	2	2	0	0	0	115	75	98	24.3141	84	0	0	4.9	32.2	3	2.73	1.26	0.8	1.73	1.93
1	69	2	2	1	0	0	125	75	98	26.8136	77	0	0	5.32	74.4	5.24	2.74	0.77	0.87	1.82	1.87
1	74	1	2	1	0	1	125	80	88	30.0914	83	0	0	5.05	58.4	10.16	2.74	1.03	0.92	1.85	1.82
1	58	1	2	1	0	0	125	85	99	29.4076	76	0	0	6.07	69.8	4.95	2.74	0.84	1.68	1.6	1.06
1	55	1	2	0	0	0	115	65	99	21.5139	64	0	0	3.99	69.3	6.52	2.74	1.25	1.75	2.19	0.99
2	48	1	2	0	0	0	115	75	75	19.4734	76	0	0	4.93	61	3.98	2.75	0.24	0.96	1.01	1.79
1	59	1	2	0	0	0	115	65	87	24.5243	71	0	0	4.28	49.4	5.26	2.75	0.7	1.05	1.62	1.7
2	71	1	2	0	0	0	105	75	84	21.9261	84	0	0	4.8	41.6	4.9	2.75	1.52	1.08	1.08	1.67
1	64	1	2	1	0	0	125	85	90	25.4767	70	0	0	6.4	16	5.83	2.75	1.79	1.09	0.23	1.66
1	59	1	2	0	0	0	115	75	98	22.5981	84	0	0	4.06	58.3	4.31	2.75	0.85	0.74	1.91	2.01
1	72	1	2	1	0	0	130	65	92	22.3214	85	0	0	4.15	71.6	5.09	2.75	0.64	0.9	1.71	1.85
1	55	1	2	1	0	0	140	95	97	26.5731	90	0	0	5.81	15	3.65	2.75	0.19	0.8	1.2	1.95
2	48	1	2	1	0	0	115	70	108	42.2218	83	0	0	5.01	43	4.98	2.75	0.19	0.97	0.99	1.78
2	49	2	2	0	0	0	115	75	78	25.2826	79	0	0	4.88	60.5	5.54	2.75	1.19	1.97	0.88	0.78
1	22	2	1	0	0	0	115	75	87	24.3025	84	0	0	4.62	45	4.07	2.75	0.1	0.94	0.96	1.81
2	71	1	2	1	0	0	95	65	106	25.8022	84	0	0	4.07	96.6	10.58	2.76	0.94	0.94	0.96	1.82
2	50	1	2	1	0	0	125	75	95	31.5301	80	0	0	4.81	33.9	4.19	2.76	0.58	1.1	1.66	1.66
1	52	1	2	0	0	0	135	75	89	23.6244	76	0	0	4.77	62.6	3.99	2.76	1.01	1.13	1.1	1.63
2	81	1	2	0	0	0	115	75	97	25.4375	82	0	0	5.35	49.4	5.35	2.76	0.77	0.89	1.52	1.87
2	50	1	2	0	0	0	95	60	85	22.7694	84	0	0	5.27	40.7	4.91	2.76	1.18	0.86	1.89	1.9
1	69	1	2	1	0	0	135	75	102	28.6048	65	0	0	4.99	54.7	5.46	2.76	0.54	1.55	2.01	1.21
2	76	1	2	1	0	0	135	80	117	36.3573	88	0	0	5.74	53.8	6.17	2.76	1.32	1.77	1.69	0.99
2	55	1	2	1	1	0	105	75	103	27.8293	65	0	0	5.1	47.6	3.07	2.76	1.49	1.78	1.53	0.98
1	77	1	2	0	0	0	125	75	94	25.0657	82	0	0	4.57	58.9	4.8	2.76	0.83	1.79	1.6	0.97
1	50	1	2	0	0	0	105	60	118	32.8731	77	1	1	5.47	67.2	4.68	2.77	1.08	0.96	1.73	1.81
2	56	1	2	0	0	0	125	80	114	34.6831	86	0	0	5.5	45	4.72	2.77	0.12	1.17	1.17	1.6
2	50	1	2	1	0	0	125	85	85	29.3333	88	0	0	4.35	44.2	4.13	2.77	1.21	1.19	1.65	1.58
1	52	1	2	0	0	0	105	65	104	28.0248	76	0	0	3.99	64.8	3.01	2.77	1.07	1.56	1.67	1.21
1	76	1	2	1	0	1	135	75	73	22.5827	84	0	0	4.53	56.8	3.85	2.77	0.62	0.87	1.86	1.9
1	51	1	2	0	0	0	115	75	94	25.5102	80	0	0	5.6	71	3.51	2.77	0.44	0.93	1.8	1.84
1	28	3	1	0	0	0	110	80	74	20.0692	79	0	0	4.89	49	5.19	2.77	0.26	0.94	0.96	1.83
1	49	2	2	0	0	0	135	90	99	24.1588	96	0	0	4.63	74	5.12	2.78	0.11	1	1.25	1.78
1	48	2	2	0	0	1	115	75	79	21.8776	84	0	0	4.62	39.7	4.99	2.78	0.73	0.88	1.33	1.9
1	51	1	2	0	0	0	105	65	93	29.0437	89	0	0	4.99	71	8.07	2.78	0.37	0.5	0.5	2.28
1	54	1	2	0	0	0	105	65	89	21.3382	84	0	0	6.74	76	2.95	2.78	0.25	1.04	1.21	1.74
2	57	1	2	0	0	0	125	85	95	27.6304	69	0	0	4.25	41.3	4.67	2.78	1.08	1.05	1.66	1.73
2	49	1	2	0	0	0	115	75	100	30.0215	70	0	0	5.55	73	5.14	2.78	0.72	0.92	0.94	1.86
2	52	1	2	0	0	0	135	75	103	32.8947	82	0	0	3.99	49.8	3.76	2.78	1.1	0.99	1.62	1.79
1	65	1	2	1	0	0	135	95	98	26.5731	80	0	0	4.32	75	7.88	2.78	0.21	0.94	1.01	1.84
1	71	2	2	1	0	0	125	75	98	23.2434	82	0	0	4.85	64.3	5.29	2.78	0.65	1.21	1.65	1.57
2	56	1	2	1	1	0	115	75	88	22.3543	79	0	0	4.83	45	5.26	2.78	0.35	1.39	0.76	1.39
1	51	1	2	0	0	0	105	65	95	28.9811	58	0	0	4.09	60.5	4.61	2.78	1.03	1.63	1.71	1.15
1	56	1	2	0	0	0	120	75	91	24.1633	70	0	0	4.34	53.5	5.93	2.78	1.35	0.93	1.71	1.85
1	60	3	2	0	0	0	125	75	115	29.7609	76	0	0	6.31	67.5	4.63	2.78	0.94	1.71	1.85	1.07
2	56	1	2	0	0	0	115	75	67	18.9745	84	0	0	4.98	63.3	4.44	2.78	0.69	1.74	1.65	1.04
1	68	1	2	1	1	0	120	100	100	27.0169	80	0	0	5.59	68	4.3	2.78	0.21	2.3	1.2	0.48
1	63	2	2	1	0	1	105	75	109	31.975	88	1	0	4.6	68.2	3.79	2.79	1.26	1	0.96	1.79
1	53	1	2	0	0	0	100	65	91	26.398	75	0	0	4.73	42.4	3.9	2.79	2.24	0.78	1.86	2.01
2	66	1	2	0	0	0	120	70	93	25.5367	80	0	0	5.23	63	4.35	2.79	0.16	0.9	1.29	1.89
1	52	1	2	1	1	1	105	60	95	26.7299	72	0	0	6.48	64	3.26	2.79	0.35	0.93	1.25	1.86
1	59	1	2	1	0	0	105	65	91	24.4352	80	0	0	4.39	52.7	5.53	2.79	0.99	0.91	1.91	1.88
2	52	1	3	0	0	0	115	60	100	27.8876	70	0	0	5.69	50	3.84	2.79	0.59	0.91	0.9	1.88
1	58	2	2	1	0	0	125	75	100	24.2215	78	0	0	6.98	52.7	4.46	2.79	0.9	0.91	1.79	1.88
2	69	1	2	1	0	0	145	85	98	23.5304	97	0	0	4.81	50.9	7.98	2.79	0.89	0.98	1.43	1.81
1	58	1	2	1	0	0	105	60	87	22.4059	84	0	0	5.47	58	4.88	2.79	0.11	1.69	0.97	1.1
1	48	1	2	0	0	0	95	60	112	28.5156	84	0	0	4.04	61	8.1	2.79	0.86	1.82	1.93	0.97
2	50	1	2	1	0	0	105	60	107	31.6242	74	0	0	4.18	41.9	3.89	2.8	0.84	0.95	1.8	1.85
2	58	1	2	0	0	0	120	75	98	26.986	89	0	0	5.64	56.2	5.6	2.8	0.62	0.87	1.93	1.93
2	25	2	2	0	0	0	115	70	83	20.4294	88	0	0	5.06	40.7	3.37	2.8	3.77	0.94	1.95	1.86
2	62	1	2	0	0	0	115	75	108	27.6888	79	0	0	4.32	25.2	4.24	2.8	0.99	1.28	2.5	1.52
1	69	1	2	1	1	1	115	65	108	26.079	70	1	0	8.4	58.2	3.3	2.8	0.82	0.92	1.52	1.88
2	71	1	2	1	0	0	135	75	85	23.2834	80	0	0	5.29	36.3	2.92	2.8	1.38	0.92	1.32	1.88
2	60	1	2	1	0	0	115	65	94	29.4758	77	0	0	4.41	50.7	5.34	2.8	1.3	1.66	1.8	1.14
2	49	1	3	0	0	0	115	55	107	31.139	70	0	0	4.2	31.8	4.44	2.8	1.61	1.68	1.64	1.12
1	48	1	2	0	0	0	125	75	90	27.1605	84	0	0	4.08	47.1	3.82	2.8	1.27	1.82	2.03	0.98
2	21	2	1	0	0	0	105	65	75	21.9363	81	0	0	5.29	48	4.47	2.8	0.14	0.97	1.24	1.83
2	84	1	2	1	0	0	100	70	90	23.4566	83	0	0	5.3	42.5	5.64	2.81	1.62	1.03	1.48	1.78
2	54	2	2	0	0	0	125	65	100	27.3438	81	0	0	4.6	54.4	5.9	2.81	1.67	0.52	1.26	2.29
1	63	1	2	0	0	0	105	65	99	30.4834	80	0	0	4.12	67	5.31	2.81	1.14	0.85	1.98	1.96
1	60	1	2	0	0	0	120	65	84	22.9421	85	0	0	4.43	46.6	5.35	2.81	0.75	1.24	1.58	1.57
1	52	1	2	0	0	0	115	75	92	25.6544	75	0	0	4.88	76.8	4.86	2.81	0.99	1.73	1.79	1.08
2	51	1	2	0	0	0	105	75	90	25.8065	88	0	0	4.22	43.2	4.15	2.81	1.04	1.78	1.95	1.03
2	55	2	2	0	0	0	115	75	80	23.3056	78	0	0	4.3	56.2	4.32	2.81	1.21	1.79	1.65	1.02
1	77	2	2	1	0	0	125	75	98	25.3155	80	0	0	12.48	57.1	7.42	2.81	1.01	2	2.1	0.81
1	57	1	2	0	0	0	115	75	94	26.0375	84	0	0	4.51	48.8	6.22	2.82	0.56	1.11	1.64	1.71
2	52	1	3	1	0	0	125	65	92	25.4767	79	0	0	4.4	44.1	5.2	2.82	0.95	0.67	2.25	2.15
2	21	2	1	0	0	0	85	55	69	22.4996	79	0	0	4.36	61	2.84	2.82	0.13	1.17	1.24	1.65
1	70	1	2	1	0	0	115	75	84	25.6312	84	0	0	5.2	49.3	5.61	2.82	1.17	1.21	2.15	1.61
1	59	1	2	0	0	0	130	65	114	26.6097	95	0	0	4.5	73.3	7.32	2.82	1.48	0.88	1.98	1.94
1	65	1	2	0	0	0	115	75	82	22.7615	95	0	0	5.41	52.1	3.15	2.82	0.94	1.26	1.55	1.56
2	50	2	2	1	1	0	135	75	89	30.8444	84	0	0	4.69	42	2.93	2.82	1.03	0.91	1.82	1.91
2	54	1	2	0	0	0	115	85	92	27.0552	77	0	0	4.28	20	7.49	2.82	0.1	1.7	2	1.12
2	78	1	3	0	0	0	115	65	90	19.7724	100	0	0	5.33	47	7.05	2.82	0.32	2	1.6	0.82
2	55	2	2	1	0	1	125	75	98	22.8928	84	0	0	4.79	12	4.65	2.82	0.21	2.44	0.26	0.38
1	64	1	2	0	0	0	145	85	70	20.6575	81	0	0	4.76	47.7	4.71	2.82	1.36	2.5	1.24	0.32
1	48	1	2	0	0	0	105	70	76	21.5645	84	0	0	4.16	53.2	4.07	2.83	1.03	1.03	1.79	1.8
1	59	1	2	0	0	0	115	75	92	23.03	84	0	0	4.58	63.9	4.24	2.83	1.7	0.96	1.26	1.87
1	86	2	2	1	0	0	130	75	82	14.6516	84	0	0	5.6	55.5	4.14	2.83	1.42	1.06	1.6	1.77
2	55	1	2	0	0	0	115	75	107	27.0993	76	0	0	4.12	39.2	6.26	2.83	0.89	1.11	1.76	1.72
2	55	1	3	1	0	0	125	85	78	20.7967	76	0	0	5.21	32.6	4.35	2.83	0.65	1.24	1.38	1.59
2	76	2	2	0	0	0	125	80	76	21.6311	79	0	0	5.29	38.4	4.67	2.83	1.15	1.55	1.11	1.28
1	61	3	2	1	0	1	105	65	93	26.6097	88	0	0	4.46	11	4.93	2.83	0.51	0.94	0.96	1.89
1	56	1	2	0	0	0	115	75	89	24.9135	73	0	0	5.85	67	4.91	2.84	1.2	1.02	1.04	1.82
2	64	1	2	0	0	0	125	95	94	20.1726	84	0	0	4.53	30.2	3.6	2.84	1.36	0.91	1.84	1.93
1	60	1	2	0	0	0	125	75	98	22.2063	78	0	0	4.87	33.4	5.65	2.84	0.78	0.96	1.8	1.88
2	61	1	2	1	0	0	135	65	94	26.986	78	0	0	4.37	44.8	4.23	2.84	0.89	0.88	2.03	1.96
2	54	1	2	0	0	0	115	75	86	27.268	93	0	0	4.11	42.7	3.25	2.84	0.98	0.83	1.82	2.01
2	51	1	2	0	0	0	120	80	78	20.8292	72	0	0	4.82	32.3	3.58	2.84	1.45	1.2	1.47	1.64
2	55	1	2	0	0	0	115	75	94	27.5873	84	0	0	5.18	34.5	5.5	2.84	1.43	0.86	1.84	1.98
2	68	2	2	1	0	0	125	75	96	26.8386	82	0	0	4.59	42.1	5.76	2.84	1.04	1.47	1.31	1.37
1	68	1	3	1	0	0	105	65	71	22.2222	87	0	0	3.93	54	4.9	2.85	1.46	0.99	2.01	1.86
1	58	1	2	0	0	0	125	75	100	22.3863	80	0	0	4.64	55.2	5.98	2.85	1.49	1.04	1.65	1.81
2	74	1	2	0	0	0	105	65	72	21.7778	84	0	0	4.46	38.3	3.69	2.85	1.01	0.86	1.9	1.99
2	49	1	2	0	0	0	105	65	108	29.2969	84	0	0	4.73	47.5	3.88	2.85	0.92	0.8	2.02	2.05
2	60	1	2	1	0	1	105	75	115	34.6021	84	0	0	5.42	10	5.36	2.85	0.91	1.18	0.35	1.67
2	53	2	2	0	0	0	110	75	88	28.4444	76	0	0	4.75	36.7	4.79	2.85	0.85	1.28	1.41	1.57
2	60	1	2	0	0	0	115	65	96	27.1203	81	0	0	4.64	44.2	6.26	2.85	1.56	1.36	1.91	1.49
1	56	2	2	0	0	0	115	75	91	24.093	84	1	0	4.36	43.1	5.12	2.85	0.57	1.4	0.15	1.45
2	50	1	2	0	0	0	105	65	103	29.7778	86	0	0	4.73	21.7	4.2	2.85	1.56	1.67	1.16	1.18
1	65	1	2	0	0	0	110	65	124	32.9879	80	0	0	6.2	46.4	3.62	2.86	1.5	0.85	1.92	2.01
2	54	2	2	0	0	0	125	70	93	26.986	82	0	0	4.73	52.4	3.33	2.86	0.93	0.85	1.8	2.01
1	52	1	2	0	0	0	105	65	85	21.7193	74	1	1	4.91	71	3.98	2.86	0.24	1.06	1.24	1.8
1	51	2	2	0	0	0	115	75	89	24.3418	88	0	0	5.23	60.4	3.35	2.86	0.6	0.9	1.65	1.96
1	81	1	2	1	0	0	135	75	89	23.5078	84	0	0	4.3	33.4	6.34	2.86	0.97	0.95	1.9	1.91
1	58	2	2	0	0	0	105	60	85	17.301	85	0	0	4.5	61.7	8.63	2.86	1.01	1.22	1.84	1.64
1	52	2	2	0	0	0	125	75	105	25.2595	69	0	0	4.67	84	6.23	2.86	1.62	0.91	1.38	1.95
2	56	1	2	0	0	0	115	80	98	30.3302	84	0	0	6.5	41.8	5.2	2.86	1.59	0.85	1.99	2.01
1	53	1	2	0	0	0	115	75	77	19.9219	97	0	0	5.37	60.7	3.21	2.86	0.63	1.77	2.06	1.09
1	54	1	2	1	0	0	135	75	99	19.5312	84	0	0	3.98	39.5	3.91	2.86	0.76	0.6	0.7	2.26
1	56	2	2	0	0	0	110	70	85	23.533	84	0	0	6.41	40.8	7.97	2.87	1.27	1.02	1.85	1.85
1	71	1	2	0	0	0	125	75	76	23.1247	76	0	0	4.7	42.3	4.13	2.87	1.27	1.04	1.53	1.83
2	61	1	2	1	0	0	105	75	85	30.2978	78	0	0	4.92	40.2	2.95	2.87	1.02	1.04	1.85	1.83
2	50	1	2	0	0	0	105	75	74	32.8731	84	0	0	4.92	40.2	2.95	2.87	1.02	1.04	1.85	1.83
2	52	1	2	0	0	0	105	65	93	29.6875	62	0	0	4.12	63	6.93	2.87	0.3	1.09	0.99	1.78
1	69	1	2	0	0	0	125	75	100	30.8463	80	0	0	13.06	40.8	5.85	2.87	0.95	0.97	1.91	1.9
2	57	2	2	1	0	0	125	65	100	24.5243	89	0	0	8.19	26.5	4.07	2.87	1.39	0.99	1.74	1.88
2	56	1	2	0	0	0	135	85	75	27.1111	88	0	0	5.04	52.5	5.03	2.87	0.75	0.84	1.26	2.03
1	67	1	2	0	0	0	125	75	92	27.4348	80	0	0	5.46	51.6	3.67	2.87	1.12	1.43	2.94	1.44
2	57	1	3	1	0	0	125	75	100	27.7344	88	0	0	5.26	15.6	5	2.87	1	0.87	0.1	2
1	48	1	2	0	0	0	105	65	89	27.2392	88	0	0	4.23	64.3	5.25	2.87	1.5	1.74	1.91	1.13
1	74	1	2	1	0	0	95	60	109	32.3468	86	0	0	5.62	122.1	6.86	2.88	0.85	0.93	1.87	1.95
1	65	1	2	1	0	0	135	75	114	24.1633	84	0	0	6.14	83.4	4.55	2.88	0.87	0.91	2.01	1.97
2	51	1	2	1	0	0	125	85	99	33.7149	90	0	0	4.9	48	4.33	2.88	0.24	1.09	1.23	1.79
2	53	1	2	0	0	0	115	60	90	23.7954	75	0	0	4.9	48	4.33	2.88	0.54	1.09	1.23	1.79
1	56	1	2	0	0	0	105	65	97	30.8594	80	0	0	4.93	61	3.82	2.88	1.02	0.83	1.82	2.05
1	48	1	2	0	0	0	105	65	104	31.5115	86	1	0	4.77	35.8	3.07	2.88	0.67	1.32	1.23	1.56
2	50	1	2	0	0	0	105	65	90	25.5367	79	0	0	4.05	61	7.37	2.88	0.32	0.91	0.97	1.97
1	58	1	2	0	0	0	130	75	94	26.449	84	0	0	5.28	12.5	4.77	2.88	0.53	1.6	1.56	1.28
1	77	2	2	0	0	0	125	70	91	24.3824	84	0	0	4.19	42.1	4.05	2.88	0.68	0.94	1.24	1.94
2	54	1	2	0	0	0	100	70	88	28.5156	84	0	0	4.83	59.4	4.72	2.88	0.76	1.77	1.86	1.11
2	63	2	2	0	0	0	130	75	80	24.2439	66	0	0	4.27	44.1	4.44	2.89	0.85	0.84	1.92	2.05
1	60	2	2	0	0	0	105	65	98	22.8624	71	0	0	5.31	51.5	3.56	2.89	0.92	0.94	2.01	1.95
2	55	1	2	0	0	0	125	85	109	28.5665	88	0	0	4.87	41.8	3.35	2.89	1.49	0.84	2.07	2.05
1	61	1	2	0	0	0	105	60	100	28.7105	68	0	0	4.75	52.5	3.99	2.89	0.74	1.65	2.1	1.24
1	49	1	2	0	0	0	125	65	110	24.4473	81	0	0	4.3	73.6	6.25	2.89	1.48	1.7	1.93	1.19
2	54	2	2	0	0	0	110	85	112	33.2031	80	0	0	5.43	72	3.56	2.89	0.19	0.89	1.3	2
2	56	1	2	0	0	0	125	75	88	22.3703	75	0	0	4.29	44.9	4.84	2.89	0.97	1.78	1.71	1.11
2	57	2	2	1	0	0	125	85	90	26.6728	74	0	0	5.71	39.7	3.6	2.9	0.71	1.02	1.74	1.88
1	50	2	2	0	0	0	120	80	92	27.5134	68	0	0	4.47	40.5	3.31	2.9	0.43	1.05	1.25	1.85
2	73	1	2	1	0	0	125	85	70	22.3703	89	0	0	4.96	45.5	4.03	2.9	1	1.1	1.31	1.8
1	59	1	2	1	1	0	105	65	98	28.3604	84	0	0	4.78	74.7	4.76	2.9	0.92	1.12	1.94	1.78
2	68	1	2	1	0	0	130	75	118	25.9151	82	0	0	4.56	26.2	4.84	2.9	1.75	0.9	2.05	2
2	65	1	2	0	0	0	125	75	108	33.7823	84	0	0	5.9	35	3.6	2.9	1.5	0.5	1.5	2.4
1	54	1	2	0	0	0	115	75	108	24.6181	88	1	0	5.89	69	4.98	2.9	0.39	1.67	2.1	1.23
1	59	1	2	1	0	0	115	75	80	19.8141	82	0	0	5.35	68	5.3	2.9	0.27	1.68	1.11	1.22
2	60	1	2	0	0	0	125	75	70	19.8189	71	0	0	5.48	32.4	3.63	2.91	1.5	0.92	1.84	1.99
1	51	1	2	0	0	0	105	65	114	23.9512	84	0	0	4.36	60.4	5.94	2.91	0.75	1.08	1.77	1.83
2	67	1	2	0	0	0	115	75	99	24.653	86	0	0	5.94	63	6.74	2.91	0.13	0.82	1.28	2.09
1	55	2	2	0	0	0	115	55	117	26.8809	82	0	0	4.27	57.1	4.45	2.91	0.75	1.1	1.2	1.81
2	64	1	2	1	0	0	145	115	85	35.4917	84	0	0	6.78	49.2	4.43	2.91	1.11	1.11	1.38	1.8
2	64	1	2	0	0	0	105	65	90	21.3333	80	0	0	3.98	48.2	4.38	2.91	0.98	0.96	1.74	1.95
1	57	1	2	0	0	0	105	65	98	22.7732	80	0	0	4.37	52.3	5.39	2.91	0.96	0.95	1.84	1.96
2	49	2	2	0	0	0	105	75	85	22.8329	72	0	0	4.75	39.2	6.99	2.91	1.27	0.9	1.92	2.01
1	64	1	2	0	0	0	105	70	89	22.4813	84	0	0	4.01	47.9	3.96	2.92	0.6	1.04	1.9	1.88
1	63	1	2	1	0	0	135	75	92	24.3911	85	0	0	4.04	74.7	6.58	2.92	1.38	0.91	1.78	2.01
1	51	1	2	0	0	0	130	85	88	19.6232	98	0	0	4.44	264	14.54	2.92	0.26	0.98	1.31	1.94
2	49	1	2	0	0	0	115	65	98	30.4935	80	0	0	4.38	41.6	2.42	2.92	0.86	0.95	1.57	1.97
1	77	1	3	0	0	0	110	65	88	23.1206	77	0	0	4.04	60.2	4.41	2.92	1.08	1.23	1.28	1.69
1	62	1	2	1	0	0	115	75	88	21.8724	84	0	0	4.64	38.8	4.08	2.92	0.88	1.25	2.1	1.67
2	52	1	2	1	1	0	140	90	107	37.1652	84	0	0	4.43	33.4	3.28	2.92	1.31	1.27	1.52	1.65
1	51	1	2	0	0	0	120	65	88	22.46	75	0	0	4.2	62.6	5.87	2.92	1.76	0.95	1.83	1.97
2	49	1	2	0	0	0	120	85	82	30.4832	84	0	0	5.89	51.6	3.19	2.92	0.99	0.77	1.95	2.15
2	53	1	2	0	1	0	115	70	80	41.2263	81	0	0	4.01	67	4.06	2.92	1	0.86	1.26	2.06
1	76	1	2	1	0	0	105	70	95	23.03	71	0	0	4.45	65.4	4.77	2.92	1.66	1.79	1.91	1.13
1	52	1	2	0	0	0	125	65	93	25.6055	78	0	0	4.59	64.9	7.09	2.93	0.82	1.01	1.74	1.92
1	52	1	2	1	0	0	110	75	100	34.9636	75	0	0	4.59	69	5.85	2.93	1.6	1.04	1.73	1.89
1	49	1	2	0	0	0	125	75	100	25.9095	81	1	0	4.24	44.5	3.94	2.93	0.59	1.05	1.94	1.88
1	60	2	2	0	0	0	120	75	78	27.2932	75	0	0	4.02	72.7	5.95	2.93	1.67	1.06	1.55	1.87
2	51	2	2	0	0	0	115	75	106	31.6443	80	0	0	5.8	54	6.23	2.93	0.1	0.98	0.89	1.95
1	62	1	2	1	0	0	125	75	100	28.0102	88	0	0	4.95	51.5	6.11	2.93	1.17	1.32	1.23	1.61
1	57	2	2	0	0	0	120	75	88	21.5019	84	0	0	5.45	61.6	5.43	2.93	2.81	0.84	1.6	2.09
1	69	1	2	0	0	0	115	75	95	25.1486	74	0	0	4.55	51.3	2.56	2.93	0.31	0.96	2.16	1.97
2	71	1	3	1	1	0	130	95	90	32.4662	84	0	0	4.62	59.9	3.54	2.93	1.47	0.8	1.5	2.13
1	57	1	2	1	0	0	115	65	106	22.7244	80	0	0	4.37	58.4	4.08	2.94	1.28	1	1.79	1.94
2	51	1	2	1	0	0	120	80	98	30.588	71	0	0	5.01	47.8	3.44	2.94	0.61	0.99	1.77	1.95
2	52	1	2	0	0	0	105	65	110	32.6294	71	0	0	5.51	57.5	5.6	2.94	0.5	1.13	1.53	1.81
1	55	1	2	0	0	0	115	70	99	19.052	84	0	0	5.72	52	4.58	2.94	0.51	1.17	1.03	1.77
2	80	1	2	0	0	0	115	65	85	22.8928	84	0	0	4.6	69.2	6.54	2.94	1.4	0.98	1.78	1.96
1	55	1	2	0	0	0	115	65	94	22.8625	61	0	0	4.88	46.9	3.35	2.94	0.71	1.2	1.3	1.74
2	72	1	2	0	0	0	135	80	95	32.4662	80	0	0	4.7	32.7	3.74	2.94	0.82	1.2	1.1	1.74
2	48	2	2	0	0	0	95	65	89	20.7369	75	0	0	4.92	56.5	3.77	2.94	0.43	1.21	1.42	1.73
2	52	1	2	0	0	0	105	75	98	20.5693	84	0	0	4.52	41.2	3.77	2.94	0.69	1.3	1.61	1.64
1	56	2	2	0	0	0	115	75	76	22.8329	84	0	0	4.42	75.5	6.25	2.94	1.25	1.61	2.02	1.33
2	62	2	2	1	0	0	135	85	116	37.5743	73	0	0	5.18	43.6	6.06	2.94	0.65	0.83	2.26	2.11
1	78	1	2	1	0	1	145	85	94	25.9909	99	0	0	6.61	88	5.4	2.95	0.35	0.94	1.17	2.01
1	55	1	2	0	0	0	115	75	98	25.6312	84	0	0	4.75	52.6	3.62	2.95	0.5	0.97	1.88	1.98
2	56	1	2	0	0	0	115	75	112	36.3108	89	0	0	4.2	39.5	4.55	2.95	0.1	0.97	1.78	1.98
2	66	1	2	0	0	0	115	75	97	21.7865	82	0	0	6.63	35.4	4.6	2.95	0.66	1.08	1.86	1.87
2	53	1	2	0	0	0	115	65	96	28	80	0	0	5.12	24.5	4.16	2.95	0.18	0.98	1.2	1.97
1	58	1	2	0	0	0	120	65	79	23.0469	85	0	0	4.11	54.4	4.17	2.95	0.52	1.16	1.85	1.79
1	79	1	2	1	0	0	135	90	82	21.1073	72	0	0	5.7	61.4	4.56	2.95	0.2	0.85	1.8	2.1
1	62	1	2	0	0	0	120	75	76	21.7738	80	0	0	4.71	50.6	4.52	2.95	0.35	1.2	1.81	1.75
1	61	1	2	0	0	0	105	65	74	19.3821	84	0	0	4.46	54.4	4.37	2.95	0.38	1.22	1.41	1.73
2	51	2	2	0	1	0	115	75	80	22.2222	78	0	0	4.35	50.4	6.36	2.95	0.8	1.25	1.54	1.7
2	71	1	2	1	0	0	100	70	94	21.2874	80	0	0	5.27	25.4	4.91	2.95	1.08	0.96	1.84	1.99
2	60	1	2	0	0	0	115	75	85	26.1719	96	0	0	4.32	47	4.1	2.95	1.53	1.9	1.5	1.05
1	59	1	2	1	0	0	105	70	93	28.257	84	0	0	5.38	59.9	6.21	2.96	1.86	1.01	1.68	1.95
1	78	1	2	0	0	0	115	75	86	24.3046	74	0	0	4.08	58.3	7.54	2.96	1.06	1.01	1.93	1.95
2	58	1	2	0	0	0	135	70	82	24.0346	80	0	0	4.54	56.1	5.28	2.96	1.28	1.04	2.17	1.92
2	68	1	2	0	0	0	130	85	95	26.2222	84	0	0	5.43	52.7	6.42	2.96	1.69	0.89	2.09	2.07
2	57	3	3	1	0	0	115	75	84	18.0802	89	0	0	5.47	55	4.93	2.96	0.29	0.57	1.68	2.39
1	64	1	2	0	0	0	130	75	86	20.9366	85	0	0	4.13	61.9	4.46	2.96	1.01	1.13	1.81	1.83
2	74	1	2	1	0	0	135	85	84	22.0741	74	0	0	5.17	37.8	4.12	2.96	0.81	0.83	2.28	2.13
1	55	1	2	0	0	0	105	60	89	26.079	78	0	0	5.04	47.4	5.95	2.96	1.2	0.94	0.96	2.02
1	53	1	2	0	0	0	125	80	91	23.2434	65	0	0	4.22	58.5	3.57	2.96	1.12	0.93	2.03	2.03
2	73	1	3	1	0	0	135	85	80	21.4844	78	0	0	4.72	47	4.01	2.96	1.31	2.9	1.2	0.06
2	55	1	2	1	0	0	115	65	81	27.1203	82	0	0	4.03	41.3	3.15	2.97	1.11	0.87	2.06	2.1
1	58	1	2	0	0	0	115	75	77	20.0288	80	1	0	5.27	57	3.91	2.97	0.57	0.89	2.2	2.08
1	51	2	2	0	0	0	115	75	98	23.833	80	0	0	4.39	56.2	6.79	2.97	1.3	1.11	1.61	1.86
2	65	1	2	1	0	0	130	75	86	25.8022	80	0	0	4.12	48.2	5.57	2.97	1.19	0.92	0.98	2.05
2	55	2	2	1	0	1	135	85	113	32.4142	85	0	0	5.3	54	5.33	2.97	0.11	1.24	0.96	1.73
1	54	1	2	0	0	0	130	75	111	28.7317	80	0	0	6.02	65.1	4.69	2.97	1.33	0.96	1.47	2.01
2	53	1	2	0	0	0	115	75	74	19.9792	100	0	0	4.89	45	4.99	2.97	0.73	1.51	1.32	1.46
2	52	1	2	0	0	0	115	85	84	23.1911	83	0	0	5.54	51.9	4.82	2.97	1.79	1.8	2	1.17
1	71	1	2	0	0	0	125	75	90	19.1406	76	0	0	5.15	71.7	5.65	2.98	0.64	1.04	1.8	1.94
1	55	1	2	0	0	0	115	65	89	26.0262	68	1	0	4.68	53.8	3.89	2.98	1.16	1.05	1.61	1.93
2	55	1	2	0	0	0	125	75	110	30.2222	85	0	0	5.65	65.3	4.47	2.98	1.05	0.99	1.6	1.99
1	54	1	2	0	0	0	115	60	83	22.3214	79	0	0	4.42	51.1	5.8	2.98	0.79	0.98	1.84	2
2	50	1	2	0	0	0	115	70	85	23.6128	82	0	0	4.48	37.7	2.58	2.98	1.17	1.09	1.64	1.89
2	72	1	2	1	0	0	135	75	106	23.74	98	0	0	5.04	39.9	7.62	2.98	1.26	1.11	1.8	1.87
2	63	1	2	1	1	0	135	85	104	34.0176	76	0	0	4.55	12.5	5.21	2.98	1.1	1.2	1.2	1.78
1	21	2	1	0	0	0	105	65	76	19.2653	84	0	0	5.88	70	3.05	2.98	0.29	1.23	0.69	1.75
1	54	1	2	0	0	0	135	75	90	21.5451	84	0	0	4.69	39	4.39	2.98	0.59	1.44	1.5	1.54
1	58	1	2	0	0	0	105	60	89	22.9421	95	1	0	4.7	69.6	3.73	2.98	1.03	0.91	1.75	2.07
2	51	1	2	0	0	0	125	65	89	22.719	82	0	0	4.62	46.3	4.29	2.98	0.82	0.95	1.33	2.03
2	54	1	2	0	0	0	115	85	108	31.3465	84	0	0	6	49.8	4.12	2.98	0.75	1.79	1.69	1.19
1	56	2	2	0	1	0	110	75	90	26.2188	80	0	0	5.65	15.2	3.6	2.98	1.1	2.1	0.98	0.88
2	73	1	2	0	1	0	125	65	88	24.4444	83	0	0	4.62	41.1	4.38	2.99	1.38	1.03	1.55	1.96
2	81	1	2	0	0	0	100	60	83	12.5976	84	0	0	6.44	42.8	7.1	2.99	0.84	1.05	1.89	1.94
2	50	2	2	0	0	0	115	65	75	24.064	85	0	0	4.81	27.9	3.59	2.99	0.79	1.13	1.81	1.86
1	52	1	2	0	0	0	115	75	87	22.1003	84	0	0	4.6	53.8	3.5	2.99	0.48	1.13	1.82	1.86
2	57	1	2	1	0	0	125	80	90	25.2994	84	0	0	4.87	40.8	4.9	2.99	1.56	0.91	1.91	2.08
1	67	1	2	1	1	1	125	75	110	33.1504	78	0	0	4.1	83.1	5.38	2.99	0.9	0.85	2.13	2.14
1	64	1	2	1	0	0	105	65	94	24.9649	88	0	0	6.44	75.4	5.43	2.99	1.35	1.78	2.08	1.21
2	69	2	3	0	0	0	95	65	94	26.4024	91	0	0	5.37	40	4.26	2.99	0.83	1.8	0.8	1.19
2	63	1	2	1	1	1	115	65	97	27.5312	88	0	0	5.9	48	5.35	3	0.55	0.94	1.49	2.06
2	64	1	2	1	0	0	125	75	63	21.7014	83	0	0	5.2	40	2.1	3	2	1	2	2
2	71	1	2	1	0	0	125	75	62	19.6506	83	0	0	4.6	26	3	3	1	1	3	2
1	86	2	2	1	0	0	125	80	68	24.6094	82	0	0	4.8	26	3	3	2	1	1	2
1	72	1	2	1	0	0	125	65	107	25.9701	78	0	0	5.25	70.5	3.58	3	0.74	1.01	2.07	1.99
1	81	2	2	1	0	0	125	70	108	23.2335	88	0	0	4.34	71.9	8.99	3	0.81	1.05	1.52	1.95
2	53	1	2	1	0	0	125	85	102	34.7656	65	0	0	4.37	12.8	4.19	3	1.03	1.07	0.22	1.93
2	48	1	2	0	0	0	120	70	89	26.5754	79	0	0	5.64	74	3.98	3	0.15	1.09	1.05	1.91
1	68	1	2	0	0	0	115	65	97	19.0311	84	0	0	3.91	55.5	4.47	3	0.56	1.15	1.79	1.85
2	49	1	2	0	1	1	115	75	95	27.6398	84	0	0	8.06	28.7	5.18	3	1.39	0.95	1.89	2.05
1	50	2	2	0	0	0	115	70	78	19.7055	83	0	0	4.46	43.3	7.78	3	0.67	1.18	1.67	1.82
2	55	1	2	0	0	0	130	85	86	25.8478	86	0	0	4.54	47.3	2.98	3	1.11	1.19	1.9	1.81
1	48	1	2	0	0	0	110	75	94	31.7418	83	1	0	4.9	72.5	6	3	0.87	1.2	1.2	1.8
2	63	1	2	0	0	0	125	80	78	19.9792	80	0	0	5.1	65	4	3	1	1.2	1.5	1.8
2	75	1	2	1	0	0	120	80	74	33.3276	87	0	0	4.5	29	3.1	3	1.1	1.2	1.1	1.8
1	53	1	2	0	0	0	105	75	90	22.0522	63	0	0	4.23	72.5	6.55	3	1.15	1.23	2.5	1.77
2	51	1	2	0	0	0	115	65	117	19.199	78	0	0	4.93	41.7	5.1	3	1.75	0.93	1.62	2.07
2	52	1	2	0	0	0	110	75	77	21.3382	74	0	0	4.74	64.7	4.5	3	0.61	1.43	1.55	1.57
1	24	2	1	0	0	0	115	65	76	22.4059	71	0	0	4.47	66.5	4.85	3	1	1.44	1.66	1.56
2	72	1	2	0	0	0	120	75	85	23.6128	86	0	0	4.6	40	3	3	1.5	1.5	1.5	1.5
2	78	1	2	1	0	0	125	80	86	25.5594	87	0	0	4.33	62.2	5.32	3	2.18	1.5	0.7	1.5
2	60	1	2	1	0	0	110	75	77	21.3675	67	0	0	4.1	33.1	6.19	3	0.46	1.51	1.39	1.49
1	65	1	2	0	0	0	125	65	100	22.9481	90	0	0	4.43	83.7	4.05	3	0.78	1.54	1.15	1.46
1	53	2	2	0	0	0	125	75	92	25.9701	84	0	0	4.76	50.2	5.86	3	1.46	1.68	2.13	1.32
1	76	1	2	0	0	0	115	75	93	24.4352	84	0	0	4.24	51.7	4.01	3	1.16	0.92	2.2	2.08
2	53	1	2	1	0	0	135	85	122	39.3525	88	0	0	4.3	10	3.5	3	1.6	1.7	2.8	1.3
2	54	1	2	0	0	0	125	80	100	24.2439	80	0	0	4.8	10	3.1	3	1.6	1.7	3	1.3
1	56	1	2	0	0	0	115	80	103	27.0993	84	0	0	4.3	10	3.6	3	0.57	1.7	2.8	1.3
2	83	1	3	0	0	0	115	70	80	22.9398	88	0	0	4.9	40	3.5	3	1.5	0.5	1.5	2.5
1	65	1	2	1	0	1	145	90	99	25.5102	81	0	0	5.17	62.6	3.83	3	0.74	2.54	1.6	0.46
2	65	1	2	0	0	0	110	65	77	20.1746	82	0	0	5.34	39.7	6.16	3.01	1.12	0.91	2.08	2.1
2	71	1	2	1	0	0	125	75	81	25.8876	71	0	0	4.42	64.2	6.17	3.01	1.14	0.93	1.97	2.08
2	58	1	2	1	0	0	135	85	104	34.049	67	0	0	5.7	66	6.88	3.01	0.57	1.1	0.94	1.91
1	50	1	2	0	0	0	125	75	109	26.2976	90	0	0	5.24	54.3	3.71	3.01	0.59	1.16	1.66	1.85
1	53	1	2	1	0	0	105	65	84	24.539	82	0	0	4.45	75	3.79	3.01	0.24	1.24	1.28	1.77
1	61	1	2	0	0	0	125	75	95	20.5986	81	0	0	4.16	60.3	3.95	3.01	0.59	0.93	1.92	2.08
1	59	1	2	0	0	0	115	75	92	30.7958	64	0	0	4.27	78.3	5.33	3.01	1.18	0.9	1.76	2.11
1	52	1	2	0	0	0	115	65	98	28.6048	80	0	0	4.43	54.4	6.58	3.01	1.06	1.7	1.95	1.31
1	70	2	2	0	0	0	110	65	103	23.5294	90	0	0	6.2	65	5.09	3.01	0.12	1.73	1.02	1.28
2	73	2	2	1	0	0	130	80	85	23.9257	70	0	0	4.62	34.6	4.03	3.01	0.73	0.94	0.96	2.07
1	76	2	2	1	0	0	125	75	97	28.125	74	0	0	4.63	91.5	9.68	3.02	0.96	1.12	1.81	1.9
2	55	1	2	1	0	0	135	75	114	30.8532	80	0	0	4.79	47.6	4.31	3.02	1.21	0.71	1.87	2.31
2	59	1	2	0	0	0	115	65	86	26.3146	96	0	0	4.19	44.7	4.54	3.02	0.88	1.19	1.89	1.83
2	49	1	2	0	0	0	105	65	97	23.4952	84	0	0	4.84	40.4	4.97	3.02	0.49	1.2	1.2	1.82
2	82	1	2	1	0	0	125	75	98	21.8787	80	0	0	4.7	33.4	2.37	3.02	0.42	0.68	1.52	2.34
2	65	1	2	0	0	0	115	75	105	30.0781	88	0	0	10.81	53	3.47	3.02	0.61	0.81	1.39	2.21
2	55	1	2	1	0	0	135	75	96	30.6667	84	0	0	4.95	37.9	4.4	3.02	0.69	1.28	1.6	1.74
1	60	1	2	0	0	0	115	75	91	24.0569	86	0	0	5.01	56.7	7.06	3.02	1.37	1.7	2.4	1.32
2	55	1	2	1	0	0	110	80	106	36.3636	84	0	0	4.5	43.6	4.66	3.02	1.25	1.81	1.82	1.21
1	85	1	2	1	0	0	125	65	99	26.6749	80	0	0	4.11	85	5.02	3.02	1.43	1.82	2.14	1.2
1	54	1	2	1	0	0	135	85	94	25.1559	88	1	0	4.12	56	3.88	3.02	1.51	1.82	2.15	1.2
1	67	1	2	0	0	0	120	85	72	25.721	84	0	0	5.73	55.5	5.13	3.03	0.86	1.06	2.02	1.97
1	52	1	2	0	0	0	115	55	90	20.202	62	0	0	6.71	63.3	4.62	3.03	0.74	1.08	1.63	1.95
1	65	1	2	0	0	0	105	75	86	24.0882	73	0	0	4.61	49.9	4.89	3.03	0.99	0.92	2.07	2.11
1	76	1	2	1	0	0	125	80	85	23.9361	70	0	0	4.51	20	6.07	3.03	0.18	0.14	3.37	2.89
1	66	1	2	0	0	0	125	75	99	23.4375	80	0	0	6.08	73	4.09	3.03	0.32	0.89	1.88	2.14
2	53	1	2	0	0	0	115	75	69	20.8889	91	0	0	4.36	37.5	4.66	3.03	1.06	1.14	1.76	1.89
1	52	2	2	0	0	0	125	75	89	26.3329	84	0	0	4.07	59.7	4.33	3.03	1.25	0.96	1.97	2.07
2	73	1	2	1	0	0	125	95	104	31.6443	84	0	0	4.79	55.7	4.6	3.03	0.83	1.15	1.44	1.88
1	68	1	2	1	0	0	115	65	112	30.854	80	0	0	5.31	52.2	6.62	3.03	1.49	0.85	1.93	2.18
2	70	1	2	0	0	0	115	75	78	19.1111	89	0	0	4.43	43.2	4.08	3.03	0.76	1.2	1.65	1.83
2	54	1	2	0	0	0	110	65	86	22.495	74	0	0	5.55	72	3.67	3.03	0.25	1.2	0.65	1.83
2	77	1	2	1	1	0	135	75	98	25.2174	92	0	0	4.18	31.1	3.64	3.03	1.29	0.84	2.08	2.19
2	65	1	2	1	0	0	125	75	90	31.6404	95	0	0	5.31	52.2	6.62	3.03	1.49	0.85	1.93	2.18
2	55	1	2	0	1	0	100	60	77	19.4363	82	0	0	5.35	35.5	3.77	3.03	0.89	1.74	2.06	1.29
2	56	1	2	0	0	0	100	75	87	21.0007	81	0	0	5.13	40.9	4.01	3.03	0.95	1.88	0.87	1.15
2	57	1	2	1	0	0	135	65	98	25.9695	70	0	0	4.5	55.7	6.69	3.04	1.61	1	1.79	2.04
2	51	1	2	0	0	0	105	75	78	26.4381	84	0	0	4.44	38.1	3.79	3.04	0.79	1.01	1.62	2.03
1	62	1	2	0	0	0	125	65	100	19.3772	71	0	0	4.82	66.7	6.25	3.04	0.77	0.9	2.12	2.14
1	62	1	2	0	0	0	125	75	75	26.2188	72	0	0	4.4	42	5.1	3.04	1.08	1.14	1.82	1.9
2	63	1	2	1	0	0	130	75	80	24.9401	88	0	0	5.33	42	5.1	3.04	1.08	1.14	1.82	1.9
2	55	1	2	1	0	0	160	115	107	36.7902	77	0	0	6.19	55	3.28	3.04	0.19	1.16	1.04	1.88
2	68	1	2	0	0	0	95	60	94	21.2191	83	0	0	6.18	39	8.79	3.04	0.16	1.19	1.03	1.85
2	62	1	2	1	0	0	135	85	93	27.5556	82	0	0	5.17	44.2	4.94	3.04	0.79	1.56	1.27	1.48
1	61	2	2	0	0	0	135	80	98	25.6544	76	0	0	4.57	78.5	4.53	3.04	1.5	1.73	2.48	1.31
2	49	1	2	0	0	0	115	75	77	25.3902	77	0	0	4.93	61.2	5.7	3.05	1.04	1.01	1.95	2.04
1	56	1	2	0	0	0	125	75	92	30.4705	84	0	0	4.85	63.1	5.49	3.05	1.03	1.02	1.89	2.03
2	54	1	3	1	0	0	115	70	83	21.8787	84	0	0	5.29	39.4	3.82	3.05	1.15	1.06	1.7	1.99
2	56	1	2	1	0	0	115	65	90	26.8352	82	0	0	4.28	30.4	4.89	3.05	1.22	0.88	1.66	2.17
2	51	1	2	0	0	0	105	75	76	17.5146	85	0	0	4.34	40	4.08	3.05	0.88	1.1	1.78	1.95
2	50	1	2	0	0	0	110	80	91	22.9481	81	0	0	5.66	41	3.56	3.05	0.12	1.1	1.35	1.95
1	26	2	1	0	0	0	105	65	82	23.1837	82	0	0	5.4	76.6	4.65	3.05	0.5	1.1	1.21	1.95
2	74	1	3	0	0	0	115	75	105	24.4444	75	0	0	4.05	30	2.97	3.05	0.92	1.13	1.93	1.92
1	52	1	2	0	0	0	105	65	91	22.3863	85	1	0	4.83	51.4	4.54	3.05	0.58	1.15	1.7	1.9
2	54	1	2	1	0	1	105	75	106	33.7774	90	0	0	7.15	40.3	4.92	3.05	0.74	0.84	1.74	2.21
1	59	1	2	0	0	0	125	65	90	25.1486	82	0	0	4.61	64.7	4.25	3.05	1.44	0.91	2.15	2.14
1	75	2	2	1	0	0	125	75	121	25.0762	91	0	0	5.84	86.5	5.36	3.05	0.94	0.88	1.81	2.17
1	62	1	2	1	0	0	105	65	90	31.1614	84	0	0	5.1	76.1	4.24	3.05	1.29	0.88	2.2	2.17
2	51	1	2	0	0	0	115	75	81	25.6837	79	0	0	4.28	30.4	4.89	3.05	1.22	0.88	1.66	2.17
1	52	1	2	0	0	0	115	65	120	23.8754	65	1	0	4.95	71.5	5.08	3.05	1.27	0.87	2.07	2.18
2	49	3	2	1	0	0	125	70	100	27.0552	91	0	0	5.32	39.9	2.28	3.05	1.68	0.92	1.58	2.13
1	95	1	2	1	0	0	135	90	75	18.9736	84	0	0	4.42	71.4	3.76	3.06	1.67	1	0.75	2.06
2	65	1	2	1	1	0	115	75	92	31.1846	100	0	0	5.64	42.7	5.97	3.06	1.3	0.59	1.18	2.47
2	71	1	2	1	0	0	115	85	78	21.7865	84	0	0	6.31	12	3.63	3.06	0.39	1.03	1.05	2.03
2	62	1	2	0	0	0	115	65	87	20.6905	80	0	0	6	50	4	3.06	0.5	0.94	0.96	2.12
1	74	1	2	1	0	0	125	75	90	21.6441	84	0	0	3.92	47.9	6.14	3.06	0.86	1.16	1.88	1.9
2	61	1	2	1	0	0	115	75	80	29.0861	84	0	0	4.09	30.3	6.03	3.06	1.28	1.17	1.86	1.89
1	57	1	2	0	0	0	125	80	92	26.7759	77	0	0	4.53	60.4	5.2	3.06	1.15	0.89	1.54	2.17
2	57	1	2	1	0	0	115	75	113	30.6667	77	0	0	4.65	60	7.37	3.06	0.27	1.3	0.91	1.76
2	60	1	2	1	0	0	120	80	74	20.4518	74	0	0	4.27	40.4	4.29	3.06	0.93	1.31	1.67	1.75
2	48	2	2	0	0	0	120	85	97	33.7693	84	0	0	5.2	41	4.33	3.06	0.9	0.91	2.14	2.15
2	54	1	2	0	0	0	105	65	82	23.6013	82	0	0	6.27	41.8	4.85	3.06	0.62	1.51	1.18	1.55
1	69	1	2	0	0	0	130	65	98	24.093	84	0	0	4.01	68.2	2.98	3.06	0.86	0.86	1.84	2.2
2	52	1	2	0	0	0	100	70	68	19.6311	84	0	0	5.75	38.8	4.78	3.06	0.5	1.67	1.29	1.39
1	56	1	2	1	0	0	135	75	115	28.4799	88	0	0	4.3	39.8	4.45	3.06	1.44	1.7	1.98	1.36
1	52	1	2	0	0	0	105	65	116	27.7551	85	0	0	5.16	68.6	4.97	3.06	0.78	1.76	2.39	1.3
2	54	1	2	1	0	0	130	85	87	27.4714	86	0	0	4.08	55.7	5.57	3.06	1.06	0.98	2.16	2.08
1	49	1	2	0	0	0	105	65	96	32.8824	80	1	0	5.73	66	6.74	3.06	0.2	0.5	1.5	2.56
1	76	1	2	0	0	0	105	65	89	23.3377	66	0	0	5.56	21.5	5.67	3.06	0.26	1.88	1.1	1.18
1	60	1	2	1	0	0	125	75	90	21.3599	70	0	0	5.56	22	4.67	3.06	1.06	1.88	1.1	1.18
1	50	2	2	0	0	0	110	70	104	24.281	74	0	0	5.87	70	4.67	3.07	0.27	0.77	1.48	2.3
2	58	2	2	0	0	0	105	75	96	24.8889	84	0	0	5.35	42.2	3.32	3.07	1.13	0.99	1.76	2.08
2	57	1	2	0	0	0	105	65	75	22.3081	84	0	0	4.26	30.4	3.31	3.07	0.53	1.21	1.87	1.86
1	61	1	3	0	0	0	135	80	84	18.7328	80	0	0	4.07	58.9	5.17	3.07	0.52	1.22	1.95	1.85
2	69	1	2	0	0	0	115	65	72	19.4363	92	0	0	4.03	43.2	6.84	3.07	0.67	1.34	1.68	1.73
1	61	1	2	0	0	0	115	70	86	22.719	70	0	0	4.21	57	2.9	3.07	1.21	0.86	1.81	2.21
2	48	1	2	0	0	0	105	75	74	28	84	0	0	4.07	36.9	6.44	3.08	1.04	1.03	1.89	2.05
1	57	1	2	0	0	0	105	65	83	24.7409	84	0	0	3.44	45.4	4.71	3.08	0.81	1.03	2.01	2.05
1	59	1	2	0	0	0	125	75	100	24.2188	81	0	0	4.87	79.3	4.25	3.08	1.03	0.96	2.06	2.12
1	48	2	2	1	0	0	145	80	100	25.7276	71	1	0	5.23	64	5.86	3.08	0.22	0.89	1.18	2.19
1	63	1	2	0	0	0	125	65	82	22.0522	77	1	0	5.71	65	3	3.08	0.58	0.86	1.32	2.22
1	60	1	3	1	0	0	115	75	99	20.3074	68	0	0	3.99	53.1	5.17	3.08	1.4	1.11	2.02	1.97
2	54	1	2	0	0	0	115	75	96	26.8386	80	0	0	4.29	43.3	6.97	3.08	1.24	0.97	2.16	2.11
2	49	2	2	0	0	0	110	65	90	27.993	76	0	0	4.26	24.4	5.55	3.08	0.89	0.78	0.8	2.3
2	58	1	2	0	0	0	95	65	84	25.9695	84	0	0	5.4	61.2	4.39	3.08	1.2	1.19	1.23	1.89
2	71	1	2	0	0	0	115	75	84	22.6757	82	0	0	4.57	54.1	5.36	3.08	0.83	1.22	1.6	1.86
2	53	1	2	0	0	0	120	75	82	24.974	84	0	0	4.76	40.2	4.6	3.08	1.53	0.91	1.73	2.17
2	71	1	2	1	0	1	125	85	94	26.6097	70	0	0	4.15	37.1	4.88	3.08	1.16	1.29	1.63	1.79
1	68	1	2	1	0	0	145	85	104	31.0735	78	0	0	5.47	74.2	6.73	3.08	0.8	0.89	1.98	2.19
2	54	1	2	0	0	0	115	65	97	29.0487	80	0	0	4.68	32	3.77	3.08	0.71	1.36	1.74	1.72
2	50	1	2	0	0	0	115	75	103	30.8012	82	0	0	5.82	41	4.23	3.08	1.21	0.92	2.17	2.16
1	58	1	2	1	0	0	130	75	94	30.116	72	0	0	4.25	45.5	5.06	3.08	1.21	0.81	2.3	2.27
2	53	2	2	1	0	0	125	75	98	29.1749	83	0	0	4.37	38.9	3.89	3.08	1.34	0.78	1.29	2.3
1	55	3	2	0	0	0	120	85	84	22.719	75	0	0	4.61	66.9	4.47	3.09	1.03	1.01	1.99	2.08
2	55	1	2	0	0	0	100	65	80	25.6312	81	0	0	6.19	35	5.11	3.09	1.1	1.02	1.95	2.07
2	69	1	2	0	1	0	135	75	95	27.0062	78	0	0	4.33	47.2	5.96	3.09	0.61	0.98	2.2	2.11
2	63	1	2	0	0	0	105	60	85	24.9896	80	0	0	4.8	35.9	4.24	3.09	1	1.13	1.62	1.96
1	74	1	2	1	0	0	130	85	96	26.7036	75	0	0	5.2	110.5	4.04	3.09	1.19	1.14	1.6	1.95
2	69	1	2	0	0	1	115	65	103	27.1111	76	0	0	3.98	49.3	4.98	3.09	1.11	1.15	1.98	1.94
1	76	1	2	1	0	0	125	65	86	21.4536	82	0	0	5.94	58	4.16	3.09	0.57	1.16	1.1	1.93
2	64	1	2	0	0	0	120	75	85	26.3779	80	0	0	4.58	35	3.89	3.09	0.85	1.17	1.83	1.92
2	65	1	2	1	0	0	115	85	82	32.4619	84	0	0	4.62	37.5	3.87	3.09	0.83	1.25	1.38	1.84
1	54	1	2	0	0	0	95	60	79	20.2848	84	0	0	4.7	83.9	6.35	3.09	0.95	1.28	1.74	1.81
2	53	1	2	0	0	0	105	75	84	27.2817	84	0	0	4.16	39.3	2.29	3.09	1.61	0.98	1.59	2.11
1	64	2	2	0	0	1	135	80	99	24.9108	110	0	0	4.63	54.2	4.68	3.09	1.24	0.98	2.19	2.11
2	54	1	2	1	0	0	155	80	97	27.4077	77	0	0	4.14	36.7	4.87	3.09	0.96	1.76	2.26	1.33
1	69	1	2	0	0	0	125	75	98	31.6032	80	0	0	4.57	72.8	8.05	3.09	1.55	2.31	2.3	0.78
2	55	2	2	0	0	0	110	75	98	24.0882	88	0	0	4.66	50.2	6.93	3.1	1.54	1	1.72	2.1
1	80	1	3	1	0	0	125	75	75	19.3698	83	0	0	5.1	26	3	3.1	2	1	2	2.1
1	70	1	2	0	0	0	115	75	100	24.6904	82	0	0	4	43.9	3.99	3.1	1.19	1.08	1.74	2.02
2	49	1	2	1	0	0	115	75	97	28.6215	80	0	0	5.47	58.9	3.26	3.1	0.79	1.09	1.1	2.01
1	68	1	2	1	0	0	115	75	84	26.7229	80	0	0	5.2	34	3.8	3.1	1.2	1.1	1.2	2
1	78	1	2	0	0	0	125	75	80	21.83	80	0	0	4.2	46	3.2	3.1	1.1	1.1	2.1	2
1	56	1	2	0	0	0	110	65	74	23.03	84	0	0	4.38	62.2	4.84	3.1	0.49	1.15	1.69	1.95
2	65	1	2	1	0	0	115	75	74	23.1911	80	0	0	4.5	45	3.1	3.1	1.1	0.8	1.2	2.3
2	68	1	3	0	0	0	125	85	74	21.9289	80	0	0	4.49	39.7	4	3.1	0.68	1.21	1.75	1.89
1	73	1	2	0	0	0	115	75	64	24.3418	80	0	0	5.2	54	3.1	3.1	1.2	0.8	1.1	2.3
2	65	1	2	1	0	1	135	95	100	24.5603	94	0	0	5.2	49.2	3.08	3.1	1.26	1.27	1.4	1.83
2	57	2	2	0	0	0	115	75	74	19.91	84	0	0	4.86	87.1	5.35	3.1	1.58	0.84	1.26	2.26
2	49	1	2	1	0	0	125	65	97	27.6601	82	0	0	4.46	48	6.95	3.1	0.97	1.29	1.3	1.81
1	62	1	2	0	0	0	115	75	89	23.8751	84	0	0	4.94	66.1	6.23	3.1	0.97	1.29	1.73	1.81
2	78	1	3	1	0	0	125	75	89	17.7096	80	0	0	4.2	45	4.2	3.1	1.3	1.3	1.1	1.8
2	74	1	2	0	0	0	120	75	65	23.7812	78	0	0	4.7	36.3	3.5	3.1	1.3	1.3	2.3	1.8
1	71	1	2	0	0	0	110	65	106	31.5886	82	0	0	4.45	49.2	5.72	3.1	1.02	0.84	1.79	2.26
2	62	1	2	0	0	0	120	80	82	22.006	84	0	0	5.4	12.5	3.2	3.1	1.2	0.84	1.87	2.26
2	68	1	3	1	0	0	135	85	97	25.8065	70	0	0	5.92	38	5.67	3.1	0.13	1.5	2	1.6
2	69	1	3	0	0	0	125	75	76	19.0443	70	0	0	4.93	47.2	4.5	3.1	0.7	0.88	1.82	2.22
1	75	2	2	1	0	0	130	65	87	20.3244	65	0	0	4.91	57.1	4.23	3.1	0.69	1.58	1.31	1.52
2	68	1	2	0	0	0	125	75	90	24.677	80	0	0	4.9	45.5	4.2	3.1	1.3	1.6	1.3	1.5
1	76	1	2	1	0	0	120	75	72	21.2279	73	0	0	5.1	63.3	12.21	3.1	0.34	0.93	1.81	2.17
1	69	1	2	0	0	0	125	85	100	26.1224	72	0	0	4.34	82	5.23	3.1	0.59	0.85	1.31	2.25
2	67	1	2	0	0	0	115	75	74	21.5045	80	0	0	4.16	29.5	4.2	3.1	0.89	0.98	1.2	2.12
2	52	1	2	0	0	0	95	60	71	16.937	86	0	0	5	68	8	3.1	1.2	1.7	0.9	1.4
1	57	1	2	0	0	0	115	75	84	24.0346	65	0	0	4.02	64.1	4.19	3.1	1.57	1.81	1.87	1.29
1	74	1	3	1	0	0	120	80	74	21.9671	84	0	0	4.8	30	3.4	3.1	1.2	2.1	1.3	1
1	72	1	2	0	0	0	125	85	96	25.3906	84	0	0	7.14	63	3.98	3.11	0.45	1.04	1.24	2.07
1	75	1	2	0	0	0	125	77.5	98	25.3331	76	0	0	4.6	66.2	4	3.11	0.67	1.06	2.1	2.05
1	73	2	2	1	0	0	120	75	90	27.2817	80	0	0	5.58	37.7	3.13	3.11	1.45	0.92	0.95	2.19
2	50	1	2	0	0	1	115	80	90	22.8329	60	0	0	4.33	41.5	4.1	3.11	1.48	1.07	2.08	2.04
1	61	1	2	0	1	0	105	65	96	26.1493	88	0	0	4.05	65.3	4.58	3.11	0.94	1.08	1.49	2.03
1	54	2	2	0	0	0	135	85	82	22.9854	84	1	0	5.23	65	5.19	3.11	0.2	0.93	1.44	2.18
2	49	2	2	0	0	0	125	70	88	24.3046	88	0	0	4.51	41.2	4.89	3.11	0.84	0.99	2.34	2.12
1	60	2	2	1	0	0	105	65	102	30.8248	84	0	0	4.25	70.3	5.7	3.11	1.27	0.87	1.93	2.24
2	52	1	2	0	0	0	115	75	118	33.6728	93	0	0	5.3	49	3.43	3.11	1.55	0.89	2.25	2.22
1	70	2	2	1	0	0	115	75	83	25.9516	79	0	0	4.01	45.6	6.26	3.11	1.23	0.99	1.25	2.12
2	54	2	2	1	0	0	135	80	90	23.4221	88	0	0	4.57	55.8	3.68	3.11	1.43	1.39	1.79	1.72
1	71	1	2	1	0	0	120	80	98	32.0312	84	0	0	5.45	88.9	5.34	3.11	1.53	0.92	1.93	2.19
1	59	1	2	0	0	0	115	65	74	23.7954	84	0	0	5.81	61.5	3.65	3.11	1.05	1.49	1.31	1.62
1	63	2	2	0	0	0	135	75	98	22.3214	86	0	0	4.1	39.7	4.16	3.11	0.74	1.52	1.59	1.59
1	55	1	2	1	0	0	115	75	94	26.8977	48	0	0	5.37	70.7	4.64	3.11	1.51	1.69	2.08	1.42
2	51	1	2	0	0	0	125	85	82	23.6128	76	0	0	5.21	21.1	4.26	3.12	1.35	1.02	1.82	2.1
2	64	1	3	0	0	0	125	90	88	21.1257	97	0	0	4.96	52	4.72	3.12	0.29	1.06	1.1	2.06
1	75	1	2	0	0	0	125	80	106	26.0617	74	0	0	4.41	49.9	4.64	3.12	0.76	1.12	1.73	2
1	58	1	2	0	0	0	110	65	89	21.3859	78	0	0	4.32	55.1	7.25	3.12	0.66	1.13	1.98	1.99
2	71	1	2	1	0	1	125	75	90	26.1593	86	0	0	17.69	51.6	5.49	3.12	1.48	1.14	1.95	1.98
2	55	1	2	1	0	0	115	75	107	30.2618	74	0	0	4.75	43.8	3.52	3.12	0.85	0.88	1.88	2.24
2	55	1	2	0	0	0	105	75	107	26.5643	92	0	0	5.03	52.2	3.52	3.12	0.18	0.93	1.78	2.19
2	70	1	2	1	0	0	115	75	74	21.58	80	0	0	3.96	38	7.28	3.12	0.11	0.94	0.96	2.18
2	63	1	2	1	0	0	135	85	100	23.0469	61	0	0	6.31	68	5.05	3.12	0.29	0.98	1.21	2.14
2	52	1	2	0	0	0	105	75	82	26.3146	84	0	0	4.9	45.5	3.66	3.12	1.56	0.88	2.2	2.24
1	57	1	2	0	0	0	95	65	103	24.0238	70	0	0	4.96	62.1	5.71	3.12	0.54	1.33	1.7	1.79
1	60	1	2	0	0	0	125	65	114	40.2344	81	0	0	6.17	68.8	7.04	3.12	2.95	0.74	2.03	2.38
2	72	1	2	0	0	0	115	90	84	30.7574	87	0	0	4.25	42	4.51	3.12	0.52	0.79	1.48	2.33
1	67	1	2	0	0	0	125	75	100	26.3465	95	0	0	4.3	69.4	4.25	3.12	0.91	1.82	2.19	1.3
1	80	1	2	0	1	0	145	90	91	25.6489	81	0	0	4.82	64.7	5.28	3.12	0.88	2.5	1.21	0.62
2	69	1	2	1	0	0	115	80	90	30.9156	84	0	0	5.01	55.3	4.2	3.13	0.99	0.92	1.82	2.21
2	54	2	3	0	0	0	120	75	89	19.91	96	0	0	4.4	48	5.82	3.13	1.61	1.11	1.96	2.02
1	58	1	2	1	0	0	145	75	91	27.3909	81	0	0	5.26	73	4.07	3.13	0.28	0.98	1.17	2.15
2	60	1	2	0	0	0	125	75	93	27.3923	81	0	0	4.15	56	3.16	3.13	0.24	1.13	1.33	2
1	61	1	2	0	0	0	125	75	98	20.061	85	0	0	4.65	67	6.25	3.13	0.76	1.15	1.94	1.98
2	52	1	2	0	1	0	125	75	91	34.375	86	0	0	4.77	37	4.62	3.13	0.5	1.24	2.58	1.89
2	51	1	2	1	0	0	125	75	96	24.1288	82	0	0	4.59	50.5	6.28	3.13	1.7	1.24	2.57	1.89
2	54	1	2	0	0	0	105	60	81	18.5529	92	0	0	4.34	43.2	7.6	3.13	0.64	0.97	2.21	2.16
1	53	1	2	1	0	0	105	65	96	27.4348	70	0	0	4.45	71.2	6.47	3.13	1.49	0.92	1.75	2.21
1	56	1	2	1	0	0	125	75	101	29.0367	72	0	0	4.36	67.2	4.95	3.13	1.6	1.57	2.18	1.56
1	58	1	2	0	0	0	125	75	91	28.699	88	0	0	5.43	53.8	4.58	3.13	2.17	0.89	2.01	2.24
2	50	1	2	0	0	0	105	65	90	21.0828	94	0	0	5.29	54.5	4.42	3.13	1.01	1.74	2.39	1.39
2	54	1	2	0	1	1	135	75	95	37.0447	84	0	0	5.14	34.2	6.2	3.14	0.5	0.92	0.98	2.22
2	60	1	2	0	0	0	125	95	82	19.313	84	0	0	4.85	44.3	5.81	3.14	1.38	1.05	1.66	2.09
2	56	1	2	1	0	0	105	75	86	22.806	70	0	0	4.56	37.6	3.35	3.14	1.21	1.08	1.9	2.06
1	59	1	2	0	0	1	125	75	115	28.578	88	0	0	8.44	38.2	4.02	3.14	2.59	0.96	1.86	2.18
2	68	1	2	1	0	0	135	105	123	35.796	86	0	0	4.88	59.5	4.68	3.14	1.43	1.11	1.71	2.03
2	68	1	3	0	0	0	115	75	90	26.6193	86	0	0	5.22	60.4	4.3	3.14	1.22	0.94	1.9	2.2
1	70	1	2	1	0	0	125	75	90	25.5102	76	0	0	3.8	53.3	6.08	3.14	1.18	1.3	2.63	1.84
1	67	1	2	0	0	0	115	75	94	22.5827	84	0	0	5.27	41.5	5.04	3.14	0.79	1.35	1.64	1.79
2	50	1	2	1	0	0	125	65	98	25	80	0	0	6	37.2	6.72	3.14	0.76	1.38	1.72	1.76
2	58	1	2	1	0	0	115	75	85	23.9224	75	0	0	4.48	28.8	3.52	3.14	1.31	0.6	0.6	2.54
1	85	1	2	0	0	0	125	75	90	24.0238	75	0	0	4.96	78	5.18	3.14	1.53	1.45	1.45	1.69
1	66	1	2	0	0	0	115	65	112	23.3234	74	0	0	4.32	24.2	5.2	3.14	0.65	0.93	0.94	2.21
1	74	2	2	0	0	0	125	75	100	19.6072	84	0	0	4.59	52.6	4.49	3.14	0.9	0.93	2.32	2.21
2	50	1	3	1	0	0	145	80	101	25.4028	80	0	0	5.54	24	2.63	3.14	1.14	0.98	1.5	2.16
1	63	2	2	0	1	1	105	65	92	24.0055	90	0	0	4.17	70.4	4.48	3.15	1.56	0.99	1.69	2.16
1	55	1	2	0	1	0	110	65	102	29.7576	85	0	0	6.23	40.2	6.07	3.15	1.99	0.7	2.1	2.45
2	52	1	2	1	0	0	135	75	92	25.3155	82	0	0	5.16	83.9	7.15	3.15	1.08	0.83	2	2.32
1	55	1	2	0	0	0	105	65	92	24.9649	80	0	0	5.49	59.2	7.11	3.15	1.37	0.87	1.86	2.28
1	68	2	2	0	0	0	125	75	84	21.3039	84	0	0	5.59	61.9	5.99	3.15	1.18	0.85	2.14	2.3
1	71	1	2	0	0	0	125	85	105	25.3444	64	0	0	4.81	65	7.16	3.15	0.12	1.05	1.42	2.1
1	53	1	2	0	0	0	110	65	89	27.0169	75	0	0	4.6	48.2	4.68	3.15	0.69	1.07	2.1	2.08
1	68	1	2	0	0	0	95	65	107	28.617	83	0	0	5.16	48.2	4.78	3.15	1.03	1.07	2.07	2.08
2	55	1	2	1	0	0	125	75	102	30.8642	80	0	0	4.28	37.6	3.69	3.15	1.53	1.09	1.63	2.06
2	48	1	2	0	0	0	115	65	86	25.7778	74	0	0	4.72	24.5	4.69	3.15	1.05	0.85	1.87	2.3
2	64	1	2	0	0	0	95	65	95	22.8269	84	0	0	4.5	34.8	5.19	3.15	1.12	1.16	1.73	1.99
2	68	1	2	1	0	0	120	90	82	22.984	88	0	0	4.83	36.2	6.97	3.15	0.91	1.19	1.86	1.96
1	67	1	2	1	1	0	115	75	96	26.1719	66	0	0	4.42	43.7	6.7	3.15	0.61	1.2	2.02	1.95
1	54	1	2	0	0	0	125	75	114	32.3265	74	0	0	4.25	59.1	6.5	3.15	0.71	0.72	1.99	2.43
1	66	1	2	1	0	0	135	85	94	27.9904	72	0	0	4.4	59.3	5.08	3.15	0.99	0.68	2.21	2.47
2	48	1	2	1	0	0	115	65	92	28.4444	85	0	0	5.27	48	7.42	3.15	0.25	0.95	1.25	2.2
2	55	1	2	0	0	0	115	70	77	19.4771	82	0	0	5.85	57.9	5.53	3.15	0.36	1.33	1.84	1.82
1	73	1	2	0	1	0	135	75	90	25.1039	84	0	0	4.67	43.9	7.46	3.15	1.37	0.98	1.99	2.17
1	55	1	2	0	0	0	130	75	96	26.6749	70	0	0	5.59	59.9	5.89	3.15	1.29	0.92	1.96	2.23
2	48	1	2	0	0	0	125	85	96	28.8415	84	0	0	4.48	34.5	3.55	3.15	0.8	1.6	1.51	1.55
1	59	1	2	1	0	0	115	86	84	23.4375	90	0	0	4.5	64.5	4.39	3.15	0.96	1.81	2.14	1.34
2	48	2	2	0	0	0	115	75	90	21.9076	80	0	0	5.94	40.8	4	3.16	2.06	1	2.01	2.16
2	73	1	2	1	0	0	145	90	100	41.4016	136	0	0	4.2	40.8	4	3.16	2.06	1	2.01	2.16
1	50	1	2	0	0	0	125	80	114	32.6531	84	1	0	4.86	74.2	4.74	3.16	0.76	0.89	1.2	2.27
1	57	1	2	0	0	0	115	75	73	20.6905	84	0	0	5.42	71.2	7.53	3.16	1.22	1.02	2.27	2.14
1	54	1	2	0	0	0	115	65	83	28.2284	80	0	0	5.47	61.6	5.49	3.16	2.01	0.68	2.4	2.48
1	56	2	2	0	0	0	125	75	90	24.0882	90	0	0	4.35	48.5	6.44	3.16	1.09	1.1	1.9	2.06
2	59	1	2	1	0	0	115	75	90	22.6003	84	0	0	4.42	60.5	3.55	3.16	1.4	0.84	1.26	2.32
2	50	1	2	0	0	0	120	65	90	24.9199	80	0	0	4.44	30	5.78	3.16	1.06	1.13	1.9	2.03
1	55	1	2	1	0	0	115	75	86	26.8923	84	0	0	4.89	48.4	5.35	3.16	1.12	1.2	1.2	1.96
1	48	1	2	0	0	1	95	75	98	26.8923	64	0	0	4.9	59.5	7.74	3.16	0.79	1.32	1.23	1.84
2	50	1	2	0	0	0	105	60	94	23.6013	83	0	0	4.98	36.4	4.27	3.16	1.03	0.91	2.26	2.25
1	52	2	3	1	0	0	125	75	98	27.2509	86	0	0	5.06	56.4	9.02	3.16	1.11	0.94	2.13	2.22
2	76	1	2	1	1	0	115	65	90	22.6003	80	0	0	4.59	43.9	3.82	3.16	0.85	0.98	1	2.18
2	61	2	2	0	0	0	115	75	98	29.0174	88	0	0	5.07	41.6	6.36	3.16	1.63	0.95	2.04	2.21
1	51	2	2	0	0	0	95	65	94	23.9224	72	0	0	6.45	63	3.74	3.16	0.13	1.9	1.14	1.26
2	74	1	2	0	0	0	115	65	85	24.653	80	0	0	4.28	50.8	5.19	3.16	0.56	2.34	1.5	0.82
2	61	1	2	1	0	0	115	75	112	36.3573	74	0	0	6.15	63.5	7.45	3.17	1.42	1.01	1.98	2.16
2	56	1	2	1	0	0	115	75	102	30.8185	71	0	0	5.59	52.8	4.08	3.17	0.88	1.03	1.73	2.14
2	57	1	2	0	0	0	105	65	108	31.6337	72	0	0	4.76	56	5.44	3.17	0.33	0.89	1.65	2.28
2	77	2	2	0	0	0	135	75	103	26.986	94	0	0	4.33	23.3	2.95	3.17	0.64	1.08	2.06	2.09
1	76	1	3	0	0	0	125	75	110	25.8166	80	0	0	5.04	67	5.81	3.17	0.17	1.09	1.17	2.08
2	53	1	2	0	0	0	115	65	79	19.1406	76	0	0	4.55	40.2	4.33	3.17	1.11	0.89	2.29	2.28
1	71	2	2	1	0	0	105	70	94	23.3355	70	0	0	4.1	53	4.74	3.17	1.09	1.11	1.92	2.06
2	56	1	2	1	0	0	125	75	110	31.2314	80	0	0	6.87	46.2	4.38	3.17	1.17	0.83	1.99	2.34
1	71	1	2	1	1	0	130	75	70	26.5643	64	0	0	5.5	26.7	3.36	3.17	1.82	0.94	0.96	2.23
1	56	1	2	0	1	0	115	75	102	31.3469	85	0	0	5.93	69	9.26	3.17	0.34	0.86	1.25	2.31
2	65	1	2	0	0	0	125	65	84	23.6013	82	0	0	4.31	42.2	4.44	3.17	1.02	1.21	1.93	1.96
2	60	1	2	0	0	0	115	65	86	30.7306	86	0	0	4.15	41.9	4.14	3.17	0.75	1.24	2.68	1.93
2	57	1	2	0	0	0	115	75	95	24.8777	83	0	0	4.5	18.4	4.58	3.17	1.63	0.24	1.56	2.93
2	53	1	2	0	0	0	125	80	72	29.5525	84	0	0	4.48	41.7	3.32	3.17	0.78	0.91	2.19	2.26
2	50	2	2	0	0	0	105	75	95	29.4321	88	0	0	5.92	46.6	5.2	3.17	0.93	1.43	1.77	1.74
2	50	1	2	0	0	0	125	75	98	28.3039	81	0	0	4.09	51.8	3.65	3.17	1.42	0.74	1.52	2.43
2	72	1	2	0	0	0	105	75	114	28.5483	84	0	0	6.27	42.3	3.11	3.17	0.71	1.72	2.35	1.45
1	74	3	2	0	0	0	115	75	93	24.6094	88	0	0	5.6	63.4	4.76	3.17	1.57	1.78	1.99	1.39
1	61	1	2	0	0	0	115	75	88	24.677	82	0	0	5.26	78.3	6.25	3.18	0.96	1.01	2.18	2.17
2	67	1	2	0	0	0	105	65	78	21.1109	71	0	0	4.71	55.2	2.86	3.18	1.08	1.05	1.83	2.13
2	49	1	2	0	0	0	115	55	81	20.83	82	0	0	4.84	41.8	3.39	3.18	0.64	1.05	1.87	2.13
1	79	2	2	1	0	0	130	80	89	20.1733	79	0	0	3.91	66.7	4.82	3.18	0.78	0.96	1.73	2.22
1	51	2	2	0	0	0	120	80	78	21.3839	76	0	0	4.75	79.8	4.56	3.18	0.87	0.96	1.6	2.22
1	80	1	2	1	1	0	135	85	92	27.2392	80	0	0	4.3	68	6.81	3.18	1.74	1.06	1.75	2.12
2	51	1	2	0	0	0	135	80	113	33.7477	82	0	0	5.4	46.1	4.74	3.18	0.85	1.09	1.64	2.09
2	51	2	2	0	0	0	115	85	101	32.4444	88	0	0	4.64	54	6.05	3.18	0.45	0.57	0.53	2.61
1	74	2	3	0	0	0	115	65	99	23.4221	80	0	0	5.74	74	5.7	3.18	0.2	0.93	1.23	2.25
2	53	1	2	0	0	0	120	75	94	27.1816	80	0	0	4.77	46.2	7.37	3.18	1.24	1.1	1.91	2.08
1	72	1	2	0	0	0	115	65	89	23.5294	78	0	0	4.32	56	3.63	3.18	1.09	1.14	1.42	2.04
2	52	1	2	0	0	0	115	75	85	27.4884	84	0	0	4.28	22.9	4.55	3.18	1.07	0.86	2.09	2.32
2	60	1	2	0	1	0	110	75	87	23.6128	84	0	0	4.92	40.4	4.93	3.18	0.81	1.28	1.85	1.9
1	52	1	2	0	0	0	105	65	90	33.2031	84	0	0	5.54	41.1	4.04	3.18	0.8	1.28	1.73	1.9
1	61	1	2	1	0	0	115	75	96	28.1337	80	0	0	5.58	72.9	4.78	3.18	0.92	0.82	0.8	2.36
1	54	2	2	1	0	0	135	75	102	26.8274	78	0	0	4.7	38.9	5.36	3.18	0.95	0.87	2.21	2.31
2	49	2	2	0	0	0	115	75	124	44.2963	84	0	0	4.81	44.9	5.87	3.19	1.23	1	2.1	2.19
2	68	1	2	1	0	1	135	85	114	31.9559	100	0	0	21.91	63	4.48	3.19	1.03	0.92	1.88	2.27
1	50	1	2	0	0	0	125	75	89	23.7954	84	0	0	4.73	48.4	4.63	3.19	0.78	1.04	2.21	2.15
2	50	1	2	0	0	0	105	75	96	29.4758	79	0	0	4.05	42	4.75	3.19	1.24	0.91	2.09	2.28
1	71	1	2	0	1	0	115	70	96	20.9644	75	0	0	4.85	67.5	3.76	3.19	0.68	1.13	2.11	2.06
1	59	1	2	0	0	0	115	65	90	26.6436	84	0	0	4.93	55.4	5.21	3.19	0.91	1.14	1.89	2.05
2	49	1	2	0	0	0	115	75	102	27.2817	70	0	0	5.48	73	6.16	3.19	0.25	0.6	0.5	2.59
1	50	1	2	0	0	0	110	65	101	29.0688	75	0	0	4.65	59.8	3.75	3.19	1.16	0.82	2.29	2.37
2	50	1	2	0	0	0	100	80	70	20.0777	84	0	0	5.23	62.5	4.22	3.19	0.75	1.17	1.78	2.02
1	53	1	2	0	0	0	115	75	96	32.3468	83	0	0	4.76	60.8	5.64	3.19	0.72	1.2	1.2	1.99
1	65	1	2	1	0	0	120	75	110	31.6158	85	0	0	5.2	80	6.63	3.19	0.31	0.94	1.25	2.25
2	59	1	2	0	0	0	115	80	85	19.052	80	0	0	4.69	61.3	6.25	3.19	1.15	1.21	1.75	1.98
2	48	1	2	0	0	0	95	75	79	24.8889	112	0	0	4.78	35.5	3.59	3.19	0.74	1.23	1.71	1.96
1	58	1	2	0	0	0	105	75	91	27.8159	88	0	0	5.53	55.7	7.39	3.19	1.01	1.3	1.82	1.89
1	72	1	2	0	0	0	130	75	104	29.7442	84	0	0	5.22	57.1	3.84	3.19	1.68	0.81	2.42	2.38
2	53	1	2	0	0	0	115	75	97	30.8185	88	0	0	4.53	36.3	5.18	3.19	0.62	1.37	1.75	1.82
2	58	1	2	0	0	0	105	75	84	21.7865	82	0	0	5.35	54	6.91	3.19	0.46	1.4	0.59	1.79
2	55	1	2	0	0	0	125	75	100	31.2175	84	0	0	4.22	35.9	3.28	3.19	0.82	1.5	0.15	1.69
2	50	1	2	0	0	0	105	65	80	23.4221	80	0	0	6.31	50	4.79	3.19	0.57	0.99	1.27	2.2
1	83	1	3	1	0	1	120	75	74	21.6713	75	0	0	5.2	54	3.2	3.2	1.2	0.8	1.2	2.4
2	76	1	2	1	0	1	115	75	74	30.0215	80	0	0	5.2	45	3.2	3.2	1.2	0.8	1.2	2.4
1	65	1	3	0	0	1	115	75	64	27.2096	80	0	0	4.2	54	3.2	3.2	1.1	0.8	1.2	2.4
1	63	2	2	1	0	0	125	65	110	27.5134	85	0	0	5.18	63	4.77	3.2	0.33	0.93	1.16	2.27
1	64	2	2	0	0	0	115	75	94	29.4107	80	0	0	4.2	54	2.3	3.2	1.2	0.86	1.89	2.34
2	68	1	2	1	0	0	115	75	74	24.7737	80	0	0	4.2	54	3.2	3.2	1.2	0.8	1.2	2.4
2	55	1	2	0	1	0	115	75	93	24.4646	76	0	0	4.2	14.2	5.2	3.2	0.92	0.96	0.94	2.24
2	71	1	3	1	0	0	115	75	74	20.3619	80	0	0	5.2	54	3.2	3.2	1.2	0.8	1.1	2.4
1	65	2	2	0	0	0	105	65	105	29.3658	78	0	0	5.2	52.1	3.2	3.2	1.1	0.8	1.1	2.4
1	73	1	2	1	0	0	115	75	76	24.2188	80	0	0	5.2	45	3.2	3.2	2.1	0.8	1.2	2.4
1	63	2	2	1	0	1	105	65	74	29.4321	80	0	0	5.2	45	3.2	3.2	2.1	1.1	1.2	2.1
1	70	1	2	0	0	0	125	85	68	19.2277	80	0	0	4.1	35	2.3	3.2	2.4	1.1	1.3	2.1
2	74	1	3	0	1	0	115	75	74	19.9762	80	0	0	5.25	54	2.1	3.2	1.2	1.1	1.2	2.1
1	73	2	2	0	0	0	115	75	74	22.571	80	0	0	5.2	54.2	3.2	3.2	1.8	1.1	1.2	2.1
2	73	1	2	0	0	0	115	75	74	18.5828	80	0	0	5.1	54	3.2	3.2	1.2	1.1	2.1	2.1
1	84	1	2	1	0	0	115	75	64	26.2188	82	0	0	5.2	45	3.2	3.2	1.2	1.1	2.1	2.1
1	69	1	2	0	0	0	115	75	84	32.4547	78	0	0	5.2	45	3.2	3.2	2.1	1.1	1.2	2.1
1	66	1	2	0	0	0	115	80	96	29.7339	80	0	0	5.1	42	1.1	3.2	1.2	1.1	2.1	2.1
2	67	1	2	0	0	0	115	75	74	20.9366	80	0	0	4.2	54	3.2	3.2	1.1	1.1	2.1	2.1
1	63	1	2	0	0	0	125	75	108	31.8342	88	0	0	5.1	45	3.2	3.2	1.1	1.1	2.1	2.1
1	74	1	2	1	0	0	115	75	94	34.2058	80	0	0	5.2	54	3.2	3.2	1.1	1.1	2.1	2.1
2	65	2	2	0	0	0	120	65	89	26.9127	88	0	0	4.2	54	3.2	3.2	1.2	1.1	2.1	2.1
2	67	1	2	0	0	0	115	70	74	20.1771	80	0	0	5.2	54	3.2	3.2	1.2	1.1	1.2	2.1
2	98	1	3	1	0	0	125	80	74	21.0007	80	0	0	5.2	54	3.2	3.2	1.2	1.1	1.2	2.1
2	69	1	2	0	0	0	115	75	74	22.7583	80	0	0	5.1	54	3.2	3.2	1.2	1.1	2.1	2.1
2	86	1	2	1	0	0	115	75	74	18.6709	78	0	0	5.1	45	3.2	3.2	1.2	1.1	1.2	2.1
2	76	1	3	0	0	0	135	77.5	86	21.3333	88	0	0	4.2	46	3.1	3.2	1.1	1.1	2.1	2.1
1	85	1	2	0	0	0	115	70	74	25.3906	80	0	0	5.2	54	3.2	3.2	1.2	1.1	1.2	2.1
2	79	1	2	0	0	0	110	75	59	19.2234	80	0	0	5.2	58	3.2	3.2	1.1	1.1	2.1	2.1
1	64	1	2	0	0	0	105	60	74	21.7784	80	0	0	5.2	54	3.1	3.2	1.2	0.8	1.1	2.4
2	69	1	2	1	0	0	115	75	89	28.3771	91	0	0	4.23	64	4.77	3.2	0.47	1.12	1.13	2.08
1	72	1	2	0	0	1	120	75	89	23.9512	85	0	0	4.12	55.8	4.67	3.2	1.01	1.12	1.63	2.08
2	75	1	2	0	0	0	115	75	74	31.8287	80	0	0	5.2	54	3.2	3.2	1.2	0.85	1.2	2.35
2	78	1	2	0	0	0	120	75	65	19.3685	80	0	0	4.5	54	3.2	3.2	1.1	0.8	1.1	2.4
1	74	1	2	1	0	0	110	75	76	19.9219	72	0	0	6.96	38.5	5.3	3.2	1.13	1.14	1.88	2.06
1	78	1	2	0	0	0	115	75	84	23.939	78	0	0	4.2	54	3.6	3.2	1.5	0.8	1.2	2.4
2	73	1	2	0	0	0	115	70	64	26.5754	80	0	0	4.2	54	3.2	3.2	1.5	0.8	1.2	2.4
2	63	1	2	1	0	0	115	75	78	27.8876	80	0	0	4.2	54	3.2	3.2	1.2	1.18	2.1	2.02
2	63	1	2	0	0	1	125	65	90	25.9645	79	0	0	5.2	62	3.1	3.2	1.2	0.7	1.2	2.5
2	68	1	2	0	0	1	115	75	69	18.7962	86	0	0	6.1	41.2	4.8	3.2	1.29	1.2	2.1	2
2	77	1	2	0	0	0	125	80	88	23.7812	84	0	0	4.7	54	3.8	3.2	1.5	1.2	2.3	2
1	68	1	2	0	0	0	115	75	95	25.6055	80	0	0	4.2	54	3.2	3.2	1.2	0.8	1.1	2.4
1	69	1	2	0	0	0	105	65	98	21.3675	80	0	0	4.2	45	2.1	3.2	1.2	1.2	2.1	2
2	75	1	2	0	0	0	135	90	95	20.5586	88	0	0	4.3	46	3.2	3.2	1.3	1.2	2.4	2
1	78	1	2	0	0	0	125	75	85	23.8281	80	0	0	4.9	35.6	3.2	3.2	1.3	1.2	2.3	2
2	73	1	2	1	0	0	127.5	87	68	14.6092	84	0	0	5.1	32	3.3	3.2	1.1	1.2	1.6	2
1	83	1	3	0	0	1	135	75	90	24.7676	80	0	0	4.8	42.5	3.5	3.2	1.5	1.2	2.3	2
2	78	1	2	1	1	0	135	75	85	27.1616	80	0	0	4.7	36.5	3.2	3.2	1.5	1.2	2.3	2
1	55	1	2	0	0	0	120	80	86	27.2392	65	0	0	4.2	73.2	6.14	3.2	1.34	1.21	1.82	1.99
1	60	1	3	0	1	0	115	75	95	23.4375	84	0	0	4.12	48	4.48	3.2	1.1	1.22	2.58	1.98
1	62	3	2	0	0	0	130	75	94	26.1224	75	0	0	5.4	12.5	3.3	3.2	1.24	1.22	1.87	1.98
1	65	1	2	1	0	0	105	65	74	19.1512	80	0	0	4.2	46	3.2	3.2	1.2	0.8	1.1	2.4
1	50	1	2	0	0	0	105	65	92	25.2163	84	0	0	4.33	73.6	7.33	3.2	0.93	1.24	2.42	1.96
2	57	1	2	0	0	0	100	60	92	26.0417	68	0	0	5.56	47.8	4.72	3.2	1.68	0.96	1.7	2.24
2	48	2	2	0	0	0	95	65	80	23.9188	84	0	0	5.23	89.1	4.52	3.2	0.88	1.28	1.53	1.92
2	82	1	2	1	0	0	135	80	90	26.4024	80	0	0	4.7	32.5	2.3	3.2	1.5	1.3	2.3	1.9
2	68	1	2	0	0	0	120	75	85	20.5442	78	0	0	4.6	32.5	3.2	3.2	1.3	1.3	2.3	1.9
2	70	1	2	0	0	1	125	75	80	23.7253	80	0	0	4.8	28.3	3.2	3.2	1.5	1.3	2.3	1.9
1	71	2	2	0	0	0	135	85	86	18.9069	84	0	0	4.99	64.5	6.06	3.2	1.2	0.77	2.1	2.43
2	64	2	3	0	0	0	105	70	86	26.2227	80	0	0	4.2	54	3.2	3.2	1.2	0.8	1.2	2.4
1	78	1	3	1	0	0	105	60	80	22.8624	80	0	0	5.2	45	3.2	3.2	2.1	0.8	1.2	2.4
2	62	1	2	0	0	0	115	75	74	21.0962	80	0	0	5.2	54	3.2	3.2	2.1	0.8	1.2	2.4
1	76	1	2	0	0	0	115	70	84	25.6544	80	0	0	5.8	45	3.2	3.2	1.2	0.8	1.2	2.4
2	50	1	2	0	0	0	115	65	90	30.7004	84	0	0	5.2	45	3.2	3.2	1.2	0.8	1.1	2.4
2	48	1	2	0	0	0	120	80	79	21.6441	75	0	0	4.08	31.6	3	3.2	0.76	1.38	1.79	1.82
1	56	1	2	0	0	0	125	75	92	23.0518	84	0	0	4.79	58.7	8.14	3.2	0.39	1.38	1.48	1.82
1	65	1	2	0	0	0	115	75	88	23.1084	84	0	0	4.2	67.4	4.4	3.2	1.1	1.4	1.5	1.8
1	75	2	2	1	0	0	115	75	88	28.7201	80	0	0	4.2	65	4	3.2	0.6	1.4	1.5	1.8
1	68	1	2	0	0	0	115	75	90	28.7317	80	0	0	5.2	45	3.2	3.2	1.1	0.8	2.1	2.4
1	57	1	2	0	0	1	125	75	98	27.0538	78	0	0	4.31	65.2	7.77	3.2	0.91	1.5	2.76	1.7
1	73	1	2	1	1	0	135	75	95	28.3987	80	0	0	4.7	36.5	3.2	3.2	2.1	1.5	2.5	1.7
2	72	1	3	0	0	0	135	85	75	19.5556	78	0	0	4.7	35.6	3.2	3.2	1.5	1.5	2.3	1.7
1	67	2	2	0	0	0	125	75	85	31.2314	78	0	0	4.7	36.5	3.2	3.2	1.5	1.5	2.5	1.7
2	50	1	2	0	0	0	110	75	79	19.2234	94	0	0	5.44	35.6	3.15	3.2	0.82	0.9	2.05	2.3
2	76	1	2	0	0	0	115	70	64	24.4898	80	0	0	4.2	54	3.1	3.2	1.2	0.8	1.5	2.4
2	78	1	2	1	0	1	125	80	90	24.4898	80	0	0	4.2	45	4.2	3.2	1.3	1.6	1.1	1.6
1	50	1	2	1	0	0	115	75	96	28.2828	88	0	1	4.84	12	4.16	3.2	0.72	0.8	1.2	2.4
2	68	1	2	1	0	0	115	75	74	38.0142	80	0	0	5.2	54	3.2	3.2	1.1	0.8	1.2	2.4
2	64	1	2	0	0	0	115	70	64	23.8751	80	0	0	5.2	34	3.2	3.2	1.2	0.8	1.1	2.4
2	50	1	2	0	1	0	105	75	81	24.1672	84	0	0	6.15	61.7	4.18	3.2	0.95	1.7	2.12	1.5
1	67	1	3	0	0	0	115	75	74	20.5049	80	0	0	4.2	54	3.2	3.2	1.2	0.8	1.1	2.4
1	69	3	2	0	0	0	115	75	100	25.5588	84	0	0	6.54	69	4.91	3.21	0.21	0.89	1.54	2.32
1	51	2	2	0	0	0	125	80	80	25.8478	84	0	0	4.77	68.5	3.48	3.21	0.88	0.93	2.13	2.28
2	68	1	2	0	0	0	117.5	67.5	87	23.4224	82	0	0	5.2	46.6	5	3.21	0.75	1.06	1.86	2.15
2	53	1	2	0	0	0	115	70	80	29.6665	80	0	0	4.52	25.2	4.52	3.21	0.52	0.95	0.97	2.26
2	55	1	2	0	0	0	135	75	88	26.635	80	0	0	4.26	25.4	4.2	3.21	0.25	0.94	0.98	2.27
1	54	1	2	0	0	0	105	65	99	26.6436	84	0	0	3.96	56.4	5.47	3.21	0.85	0.89	2.19	2.32
2	52	1	2	0	0	0	125	75	88	24.0055	76	0	0	4.46	49.7	5.06	3.21	0.67	1.08	1.74	2.13
1	58	1	2	0	0	0	120	80	94	26.5731	80	0	0	4	46.9	3.91	3.21	1.1	1.09	2.02	2.12
2	53	1	2	0	0	0	125	85	111	38.7097	83	0	0	4.26	34.6	4.2	3.21	1.64	0.91	0.95	2.3
1	68	2	2	0	0	0	115	75	106	25.3906	88	0	0	4.26	29.5	5.2	3.21	0.25	0.92	0.98	2.29
2	51	1	2	0	0	0	120	75	78	26.2227	78	0	0	5.01	47	7.65	3.21	0.21	0.94	0.96	2.27
2	58	1	3	1	1	0	125	65	109	33.2937	84	0	0	5.76	31.9	3.77	3.21	0.97	1.15	2.06	2.06
2	53	1	2	0	0	0	120	75	98	24.3865	84	0	0	4.61	36.7	6.61	3.21	0.92	0.91	2.18	2.3
2	46	1	2	1	0	0	135	80	100	29.1749	88	0	0	4.26	29.5	4.2	3.21	0.54	0.94	0.98	2.27
1	62	2	2	1	0	0	105	65	100	24.4352	84	0	0	4.68	27.4	5.4	3.21	0.65	0.92	0.94	2.29
1	76	1	2	1	0	0	135	85	103	28.257	68	0	0	5.24	29.5	4.2	3.21	0.95	0.94	0.98	2.27
1	65	1	2	1	0	0	115	75	98	23.3091	84	0	0	5.37	51.3	6.76	3.21	0.44	1.27	1.71	1.94
2	55	2	2	1	1	0	125	85	83	25.8022	90	0	0	6.16	27.9	5.2	3.21	0.81	1.27	1.98	1.94
2	69	1	2	0	0	0	125	65	96	28.8523	89	0	0	4.26	27.5	4.2	3.21	0.36	0.91	0.95	2.3
2	54	1	2	0	0	0	105	65	102	31.6032	59	0	0	5.29	52.8	5.19	3.21	0.46	0.85	1.61	2.36
2	51	1	2	0	0	0	90	55	94	23.3726	80	0	0	4.25	24.6	4.2	3.21	0.95	0.92	0.95	2.29
2	62	1	3	0	0	0	115	65	84	23.9257	97	0	0	4.25	26.5	4.2	3.21	0.63	0.95	0.98	2.26
2	70	1	2	0	0	1	115	85	80	20.1746	79	0	0	13.06	40.9	4.45	3.21	1.35	0.88	1.75	2.33
2	56	1	2	0	0	0	135	80	98	29.5858	85	0	0	4.25	14.8	4.25	3.21	0.94	0.95	0.98	2.26
2	55	1	2	0	0	0	105	65	95	34.2327	81	0	0	4.31	50.9	3.39	3.21	0.73	1.41	1.73	1.8
2	70	1	3	0	0	0	115	75	64	21.9388	80	0	0	5.2	54	3.2	3.21	1.2	0.8	1.2	2.41
1	56	1	2	0	0	0	125	65	110	29.3848	86	0	0	5.21	39.5	4.5	3.21	1.5	0.91	0.94	2.3
1	49	1	2	0	0	0	135	75	99	24.3865	84	0	0	4.21	46.3	5.06	3.21	1.21	0.7	0.6	2.51
2	52	2	2	0	0	0	105	65	104	31.25	87	0	0	6.32	52.5	4.5	3.21	0.97	1.7	2.57	1.51
2	60	1	2	0	0	0	115	75	80	21.6441	78	0	0	4.26	25.4	4.2	3.21	0.65	0.97	0.68	2.24
1	52	1	3	0	0	0	115	65	92	24.2424	66	0	0	4.45	73.6	5.27	3.21	0.73	1.8	1.85	1.41
2	54	2	2	1	0	0	135	90	90	23.3377	100	0	0	6.54	12	5.91	3.21	0.55	0.71	1.49	2.5
2	60	1	2	1	0	0	135	80	54	31.245	85	0	0	3.77	68.5	3.48	3.21	1.88	0.93	2.13	2.28
1	51	1	2	0	1	0	120	65	109	27.6095	87	0	0	5.03	14	5.14	3.22	0.52	1.05	1.29	2.17
2	65	1	2	1	0	0	140	85	92	24.5603	75	0	0	5.03	14	5.14	3.22	0.52	1.05	1.29	2.17
2	59	1	2	0	0	0	115	75	80	23.4566	84	0	0	4.84	39.7	5.29	3.22	2.42	0.92	2	2.3
1	74	1	2	1	0	0	135	65	98	25.3069	94	0	0	5.61	71	3.95	3.22	0.55	0.88	1.98	2.34
1	67	1	2	0	0	0	125	75	110	24.8591	84	0	0	4.67	62	3.74	3.22	0.51	1.14	1.49	2.08
2	83	1	2	1	0	1	135	85	85	22.3133	80	0	0	4.79	38.2	4.65	3.22	0.96	1.15	1.26	2.07
2	65	1	2	0	0	0	115	65	86	18.026	84	0	0	5.13	10.7	5.04	3.22	1.65	1.23	2.78	1.99
1	52	1	2	0	1	1	105	75	80	22.3757	69	0	0	4.95	36.6	4.87	3.22	0.41	1.43	1.78	1.79
1	71	1	2	0	0	0	125	80	90	37.5	98	0	0	5.23	47.5	4.16	3.22	1.34	0.86	1.91	2.36
1	77	1	2	1	0	0	120	80	94	29.4107	90	0	0	4.08	57.9	6.25	3.22	0.85	0.93	2.28	2.29
2	63	1	2	1	1	1	125	75	103	28.0404	82	0	0	19.84	58.3	4.48	3.22	0.76	1.8	1.93	1.42
2	51	1	2	0	0	0	110	65	86	23.2434	84	0	0	4.93	64.3	4.93	3.23	1.01	1.01	2.08	2.22
2	77	1	3	1	0	0	115	85	78	18.026	84	0	0	5.78	50	3.67	3.23	1.44	1.03	1.95	2.2
1	53	2	2	0	0	1	115	60	90	23.1473	70	0	0	23.36	55.7	5.6	3.23	0.8	0.9	2.38	2.33
2	48	1	2	1	0	0	135	75	95	48.7896	80	0	0	4.75	46	3.6	3.23	1.52	0.99	2.27	2.24
2	58	1	2	1	0	0	135	85	96	28.3632	72	0	0	5.89	53	5.79	3.23	0.2	0.9	1.27	2.33
2	49	1	2	0	0	0	125	75	90	34.1311	70	0	0	4.64	47.6	3.94	3.23	1.38	1.1	1.82	2.13
1	52	1	2	0	0	0	125	75	100	24.977	80	0	0	4.65	59	4.28	3.23	0.7	1.11	2.16	2.12
1	69	1	2	1	0	0	130	75	82	26.4024	82	0	0	5.5	55.7	3.79	3.23	1.53	1.12	2.12	2.11
2	72	1	3	1	0	0	135	85	86	19.9762	86	0	0	5.46	24.5	6.09	3.23	1.6	0.91	1.18	2.32
2	63	1	2	1	1	0	135	85	79	23.0112	76	0	0	4.65	52.9	3.64	3.23	1.15	0.88	2.33	2.35
2	48	1	2	0	0	0	115	75	78	26.6586	74	0	0	4.85	36.6	5.77	3.23	0.61	1.24	1.92	1.99
2	54	1	2	1	0	0	110	65	90	28.6917	84	0	0	4.84	45.7	3.52	3.23	1.21	1.37	1.68	1.86
2	53	1	2	1	0	0	115	80	104	28.9461	98	0	0	4.64	39.3	4.83	3.23	0.75	1.44	1.88	1.79
1	72	1	2	1	0	0	135	75	108	25.5937	80	0	0	4.91	108.7	8.11	3.23	0.97	0.67	2.72	2.56
1	58	1	2	0	1	1	115	75	94	29.0659	78	1	0	4.98	32.7	3.86	3.23	0.92	1.53	1.4	1.7
2	68	1	2	0	0	0	135	85	96	26.7229	72	0	0	5.64	41.4	4.83	3.23	1.34	0.93	2.07	2.3
2	52	1	2	0	1	0	115	75	86	26.6389	84	0	0	4.45	47.2	3.76	3.23	0.61	0.99	1.92	2.24
2	52	1	2	0	0	0	115	65	101	30.4438	88	0	0	6.25	54	4.38	3.23	0.95	1.81	2.52	1.42
2	58	1	2	1	0	0	135	95	84	21.3039	86	0	0	6.22	67.7	4.56	3.24	1.19	1.03	2.05	2.21
2	57	1	2	0	0	0	110	75	87	19.3685	76	0	0	4.25	43	6.2	3.24	1.47	1.04	1.77	2.2
2	65	1	2	0	0	0	120	85	88	25.4767	84	0	0	4.6	27.5	4.6	3.24	0.35	0.97	0.98	2.27
1	74	1	2	0	0	0	105	65	94	21.7738	84	0	0	4.94	45.4	6.61	3.24	1.13	1.06	2.14	2.18
2	53	1	2	0	0	0	105	75	61	22.806	84	0	0	4.45	32.7	3.4	3.24	0.8	1.09	2.09	2.15
1	50	1	3	0	0	0	115	75	94	25.9107	82	0	0	5.26	16.5	4.5	3.24	0.25	0.92	0.94	2.32
2	57	1	2	1	0	0	175	100	119	33.6485	61	0	0	4.03	53.1	3.32	3.24	2.1	1.16	1.81	2.08
2	67	1	2	0	0	0	120	80	94	23.6832	86	0	0	5.24	41.9	3.92	3.24	0.93	1.17	2.26	2.07
1	51	3	2	0	0	0	125	65	99	23.5883	75	0	0	4.7	60.6	4.67	3.24	2.02	0.85	2.12	2.39
2	54	1	2	0	0	0	125	84.5	102	29.7284	75	0	0	4.33	40.8	3.5	3.24	0.47	1.19	1.96	2.05
2	54	1	2	0	0	0	125	75	103	26.7094	76	0	0	4.52	36.8	3.93	3.24	1.45	1.23	1.89	2.01
1	77	1	2	0	0	0	110	65	78	16.456	75	0	0	4.9	62.6	7.27	3.24	1.05	1.27	1.94	1.97
2	51	2	2	0	0	0	105	65	85	23.5556	85	0	0	3.96	30.1	7.9	3.24	0.86	1.29	1.9	1.95
1	70	1	2	0	0	0	95	75	83	23.5304	84	0	0	4.3	62.7	7.3	3.24	0.73	1.3	1.89	1.94
2	57	1	3	1	0	1	125	85	109	32.831	74	0	0	4.9	58.4	3.33	3.24	1.51	0.96	1.93	2.28
2	57	1	2	0	0	0	125	85	98	35.4564	72	0	0	4.74	38.2	3.41	3.24	1.27	0.97	2.12	2.27
2	49	1	2	0	0	0	95	65	104	29.7521	85	0	0	4.71	50.4	5.15	3.24	1.96	0.96	1.88	2.28
2	54	1	2	1	0	0	135	60	86	20.5049	77	0	0	4.4	50.2	5.01	3.24	1.01	1.58	1.74	1.66
1	51	2	2	0	0	0	130	80	96	28.7197	86	0	0	4.87	69.8	4.77	3.24	1.7	1.78	2.24	1.46
1	20	1	1	0	0	0	115	75	79	17.239	80	0	0	5.31	59	4.3	3.24	0.21	0.93	1.64	2.31
1	62	1	2	0	0	0	95	65	114	33.6901	80	0	0	6.31	59	7.3	3.24	0.21	0.93	1.64	2.31
1	50	2	2	0	0	0	115	65	104	27.6888	63	0	0	5.23	57.1	4.16	3.24	1.22	1.81	2.08	1.43
2	77	2	2	1	0	0	125	70	62	18.5529	94	0	0	6.12	39	4.74	3.24	1.82	0.95	2.22	2.29
2	56	1	3	1	0	0	115	75	90	23.8281	83	0	0	3.94	63.6	7.64	3.25	2.49	0.98	1.89	2.27
1	55	2	2	1	0	0	125	75	93	29.7521	80	0	0	4.45	49.8	6.96	3.25	1.65	0.98	1.68	2.27
1	66	2	2	1	0	1	125	75	110	40.8935	82	1	0	9.61	59.4	2.82	3.25	1.18	0.94	1.97	2.31
2	78	1	2	1	0	0	105	75	60	16.2331	77	0	0	4.52	40.4	5.02	3.25	1.11	1.05	1.96	2.2
1	49	2	2	0	0	0	135	75	96	28.3447	74	0	0	4.55	68.7	4.76	3.25	1.24	0.94	0.96	2.31
2	50	1	2	0	0	0	125	75	93	29.2101	80	0	0	4.45	59.6	3.89	3.25	0.77	1.09	1.83	2.16
2	58	1	2	0	0	0	125	75	88	24.2382	80	0	0	4.5	46	5.83	3.25	0.79	1.1	2.06	2.15
2	91	1	3	1	0	0	135	105	94	16.4366	98	0	0	5.88	48	7.72	3.25	0.2	1.14	1.05	2.11
2	52	2	2	0	0	0	120	80	78	27.3399	84	0	0	4.08	39.4	4.82	3.25	0.56	1.16	2.08	2.09
2	52	1	2	1	0	0	125	75	96	28.8889	96	0	0	4.08	35.2	4.32	3.25	0.81	1.2	2.19	2.05
2	76	1	3	1	0	0	140	85	100	24.4511	80	0	0	6.17	15	3.85	3.25	1.29	1.22	1.67	2.03
1	51	1	2	1	0	0	115	75	86	21.4109	76	0	0	4.4	33.7	3.87	3.25	1.15	1.23	1.23	2.02
1	63	1	2	0	0	0	115	65	74	18.937	65	0	0	5.13	54	4.17	3.25	0.75	1.25	1.71	2
2	59	1	2	0	0	0	115	75	90	24.8777	88	0	0	4.85	42.9	5.74	3.25	0.66	1.27	1.67	1.98
2	53	1	2	0	0	0	95	65	88	22.806	84	0	0	4.97	49.8	5.13	3.25	1.61	0.72	2.18	2.53
2	85	1	3	1	0	0	135	90	95	31.2175	84	0	0	4.04	63.7	4.28	3.25	1.42	1.52	0.8	1.73
2	73	1	2	0	0	0	120	75	64	22.006	80	0	0	4.76	33.1	5.07	3.25	0.93	0.92	0.88	2.33
1	71	1	2	1	0	0	125	65	98	25.0657	80	0	0	4.66	40.1	4.32	3.25	1.19	0.79	2.46	2.46
1	60	1	2	0	0	0	135	75	103	23.9512	76	0	0	4.05	57.5	6.16	3.26	1.24	1.01	1.98	2.25
2	59	1	2	0	0	0	115	65	103	25.6544	74	0	0	4.34	52.1	4.61	3.26	1.4	1.03	1.56	2.23
1	54	1	2	0	0	0	125	65	100	23.5883	80	0	0	4.32	42.5	3.44	3.26	0.54	1.08	2	2.18
1	69	1	2	0	0	0	135	85	102	25.2994	66	0	0	5.24	28.4	4.2	3.26	0.19	0.94	0.98	2.32
1	49	1	2	0	0	0	115	75	81	25.1559	82	0	0	5.79	60	4.09	3.26	0.18	0.92	1.23	2.34
1	51	1	2	0	0	0	95	60	110	28.1969	80	0	0	5.29	10	5.98	3.26	0.22	1.16	1.19	2.1
1	72	2	2	0	0	0	115	65	87	22.4996	72	0	0	5.29	10	5.98	3.26	0.52	1.16	1.19	2.1
2	64	1	2	0	0	0	115	75	84	30.9627	71	0	0	4.61	50.3	5.29	3.26	1.14	1.16	1.5	2.1
2	55	1	2	0	0	0	105	60	80	27.8293	80	0	0	4.64	51.1	4.54	3.26	0.83	1.18	1.54	2.08
2	65	1	2	0	0	0	105	65	67	17.3484	84	0	0	4.01	26.3	3.22	3.26	1.06	1.19	2.01	2.07
1	54	1	2	0	0	0	125	75	88	24.977	84	0	0	5.41	60	6.14	3.26	0.78	1.22	1.84	2.04
1	62	1	2	0	0	0	115	65	98	20.2848	81	0	0	4.55	61.1	6.69	3.26	1.18	0.9	1.73	2.36
2	56	2	2	1	0	0	125	75	87	21.1553	78	0	0	4.66	25.6	3.7	3.26	0.87	0.95	2.36	2.31
2	61	1	2	0	0	0	115	75	72	20.9184	90	0	0	6.05	58.5	6.02	3.26	0.87	0.94	1.92	2.32
2	63	1	2	0	0	0	100	75	74	25.8876	84	0	0	5.38	46	6.65	3.26	0.14	1.42	0.13	1.84
2	53	1	2	1	0	0	135	85	116	38.5215	83	0	0	6.3	50	3.19	3.26	1.1	0.75	1.59	2.51
2	73	1	2	1	0	0	105	65	84	21.6441	84	0	0	5.87	46.8	4.67	3.26	1.1	1.79	2.54	1.47
2	49	1	2	0	0	0	115	80	101	31.9559	88	0	0	5.7	56.2	5.45	3.26	1.27	1.81	2.43	1.45
2	41	2	2	0	0	0	120	85	112	25.7117	82	0	0	5.27	63	7.07	3.26	0.21	0.9	1.29	2.36
2	54	1	2	0	1	0	95	65	101	27.9267	76	0	0	6.62	64	4.12	3.27	0.31	1.01	1.89	2.26
1	67	1	2	0	0	0	125	80	98	25.9107	74	0	0	4.51	82	5.54	3.27	0.45	0.9	1.56	2.37
2	71	1	2	0	0	0	115	75	80	24.5268	84	0	0	4.95	54.9	4.43	3.27	0.93	1.03	2.25	2.24
2	50	3	2	0	0	0	95	60	90	22.5466	70	0	0	5.25	46	5.35	3.27	0.14	0.12	0.15	3.15
1	48	1	2	0	0	0	125	75	89	30.0215	84	0	0	6.2	41.8	3.65	3.27	0.82	1.1	1.2	2.17
1	73	1	2	0	0	0	105	65	79	20.9573	76	0	0	5.14	52	5.5	3.27	1.12	1.1	1.2	2.17
2	53	1	2	0	0	0	120	85	86	20.0288	86	0	0	5.07	49.5	4.93	3.27	0.73	0.93	2.23	2.34
2	58	1	2	1	0	0	135	75	103	35.0862	78	0	0	9	55.9	4.56	3.27	0.71	1.21	1.81	2.06
1	62	1	2	1	0	0	115	75	92	25.5296	88	0	0	4.95	68.8	6.73	3.27	1.45	0.88	2.05	2.39
2	52	1	2	0	0	1	125	65	96	22.1003	85	0	0	4.53	26.1	4.67	3.27	1.06	0.97	1.32	2.3
1	57	1	2	0	0	0	105	65	76	17.9982	67	0	0	4.29	52.2	5.57	3.27	1.3	1.23	2.01	2.04
2	57	2	2	1	0	0	115	75	79	23.833	90	0	0	4.29	35.3	4.75	3.27	1.03	1.24	1.59	2.03
2	52	1	2	0	0	0	115	70	71	18.7305	80	0	0	4.22	40.3	5.31	3.27	1.24	0.6	0.6	2.67
2	73	2	2	0	0	0	115	65	92	23.0469	80	0	0	4.92	48.7	6.32	3.27	0.73	1.29	1.98	1.98
1	53	1	2	0	0	0	110	65	86	20.83	76	0	0	4.13	59.1	7.17	3.27	1.61	0.94	2.06	2.33
2	51	1	2	1	0	0	135	80	93	26.9531	83	0	0	4.36	46.5	3.49	3.27	1.26	1.41	1.86	1.86
1	57	1	2	1	0	0	135	75	112	24.977	66	0	0	4.4	59.5	5.55	3.27	1.6	0.97	1.72	2.3
1	68	1	2	0	0	0	135	75	92	23.5294	88	0	0	6.07	49.3	3.15	3.27	1.36	1.61	2.59	1.66
1	72	1	2	1	0	0	120	65	97	23.1473	64	0	0	4.52	68.9	6.49	3.27	0.92	0.3	2	2.97
2	50	1	2	0	0	0	125	80	105	32.4142	88	0	0	4.45	44.7	2.57	3.27	1.37	0.88	2.34	2.39
1	59	1	2	0	0	0	125	75	108	38.9645	84	0	0	5.14	72.1	5.88	3.28	0.57	1.04	2.1	2.24
1	67	1	2	0	0	0	125	65	90	22.5896	78	0	0	5.53	80.7	4.76	3.28	2.24	1.12	1.82	2.16
2	62	1	2	1	0	0	125	75	90	29.0943	87	0	0	4.53	49.1	3.99	3.28	1.34	1.13	1.56	2.15
1	74	1	2	1	0	0	135	75	98	29.903	82	0	0	5.6	55	5.44	3.28	0.42	0.98	1.1	2.3
1	61	1	2	0	0	0	125	80	119	30.863	95	0	0	6.08	59	4.28	3.28	0.17	0.6	0.5	2.68
1	71	1	2	1	0	0	130	75	96	25.3515	85	0	0	4.57	75	6	3.28	0.83	1.14	1.93	2.14
1	55	1	2	0	0	0	95	75	81	22.1367	75	0	0	5.62	71	3.44	3.28	0.75	1.21	1.98	2.07
2	59	1	2	0	0	0	115	65	81	22.3674	84	0	0	4.28	48.5	4.44	3.28	1.15	0.28	0.85	3
2	49	2	2	1	0	0	150	95	86	22.9398	83	0	0	5.71	104	5.07	3.28	0.28	1.24	1.13	2.04
2	54	1	2	0	0	0	105	65	95	26.2845	76	0	0	4.31	44.9	5.1	3.28	1.22	0.83	2.29	2.45
2	61	1	2	0	0	0	115	75	86	17.7096	76	0	0	4.87	29.4	3.7	3.28	1.06	0.93	2.24	2.35
2	75	2	2	1	0	0	135	95	102	28.8754	90	0	0	5.07	37	3.76	3.28	1.23	1.32	1.8	1.96
2	55	2	2	1	0	0	130	75	96	27.268	88	0	0	4.26	30.1	4.75	3.28	1.33	1.32	1.54	1.96
1	65	1	2	0	0	0	125	80	73	21.4844	72	0	0	5.57	59.9	3.92	3.28	0.89	1.34	1.7	1.94
1	60	2	2	0	0	0	95	60	100	30.4272	87	0	0	4.47	63.1	5.51	3.28	1.59	1.55	2.4	1.73
2	62	1	2	0	0	0	95	70	91	24.5089	74	0	0	5.13	46.7	4.29	3.28	1.25	0.93	1.99	2.35
1	53	2	2	0	0	0	120	65	98	25.5296	85	1	0	4.69	59.8	5.37	3.28	1.15	0.95	1.94	2.33
2	54	1	2	0	0	0	125	75	102	31.6337	82	0	0	5.7	37.4	2.4	3.28	0.83	0.78	2.35	2.5
1	64	2	2	0	1	0	130	75	115	28.5483	81	0	0	5.34	47.4	6.24	3.29	0.56	1	2.26	2.29
2	51	1	2	1	0	0	125	85	97	29.0943	84	0	0	4.3	54.5	4.33	3.29	1.39	1.01	2.12	2.28
1	51	1	2	0	0	0	95	65	100	27.9155	76	0	0	4.93	73.6	7.22	3.29	0.41	1.02	2.54	2.27
2	55	1	2	1	0	0	120	80	74	34.049	84	0	0	4.3	29.9	3.72	3.29	1.6	0.89	2.34	2.4
2	57	1	2	1	1	0	115	75	88	25.2994	88	0	0	4.7	40.4	4.05	3.29	1.22	1.11	2.09	2.18
2	71	1	3	1	0	0	105	65	78	22.3133	72	0	0	4.86	40.7	7.05	3.29	1.21	1.11	1.81	2.18
1	64	1	2	1	0	0	125	75	78	23.4375	69	0	0	5.16	54.1	4.62	3.29	0.56	1.19	1.85	2.1
1	65	1	2	0	0	0	125	75	92	25.4581	76	0	0	4.25	42.2	4.67	3.29	1.15	0.93	2.26	2.36
2	55	1	2	1	0	0	115	80	94	31.0056	84	0	0	6.79	41	4.79	3.29	0.35	1.21	1.87	2.08
2	76	1	2	1	1	0	125	85	109	23.634	84	0	0	5.27	67.1	3.54	3.29	0.14	0.9	1.98	2.39
2	51	2	2	0	0	0	125	75	104	30.8012	100	0	0	4.79	27.3	3.41	3.29	0.58	1.3	1.2	1.99
1	57	1	2	0	0	0	120	75	82	24.9649	80	0	0	4.83	59.5	5.81	3.29	0.89	0.96	2.34	2.33
1	71	1	2	0	0	0	140	75	85	29.0437	85	0	0	4.86	59.6	3.4	3.29	0.86	0.88	2.21	2.41
1	56	1	2	0	0	0	115	60	90	24.0055	96	0	0	4.78	77.1	7.12	3.29	0.7	0.87	2.21	2.42
1	73	1	2	0	0	0	125	75	110	25.1559	70	0	0	4.86	59.6	3.4	3.29	0.86	0.88	2.21	2.41
1	67	1	2	0	0	1	115	75	80	23.8087	82	0	0	5.07	55.5	6.05	3.29	1.44	1.7	2.39	1.59
1	75	1	3	0	0	0	100	65	90	22.9591	95	0	0	5.13	72.4	7.54	3.29	1.37	1.72	2.59	1.57
1	57	1	2	0	0	0	115	65	105	29.4107	74	0	0	5.68	77	5.2	3.29	0.96	1.76	1.18	1.53
1	84	1	2	0	0	1	125	75	94	25.0995	82	0	0	5.2	67	4.35	3.3	0.28	1.01	1.32	2.29
2	61	1	2	0	0	0	95	65	110	28.3053	76	0	0	4.63	42.8	4.89	3.3	0.69	1.03	2.16	2.27
1	71	1	2	0	0	0	135	75	98	22.8374	84	0	0	6.2	69.2	7.73	3.3	0.87	1.07	2.14	2.23
2	71	1	3	0	0	0	125	75	83	21.6206	80	0	0	5.15	76	3.87	3.3	1.47	0.91	1.7	2.39
1	73	1	2	1	0	0	125	80	80	20.5226	84	0	0	5.45	85	10.49	3.3	0.59	1.11	1.76	2.19
1	86	1	3	0	0	0	115	65	94	21.9261	72	0	0	5.03	67.4	5.43	3.3	0.93	0.99	2.15	2.31
2	49	1	2	0	0	0	125	85	101	34.9975	88	0	0	5.49	54.7	5.49	3.3	1.57	1.15	1.79	2.15
2	55	1	2	0	1	0	125	85	95	24.2188	100	0	0	5.89	51.1	4.17	3.3	1.12	1.16	2.25	2.14
1	55	1	2	0	0	0	110	75	84	24.9135	84	1	0	5.79	38.2	4.21	3.3	0.7	0.86	2.45	2.44
1	50	2	2	0	0	0	115	75	88	22.8624	83	0	0	6.42	71.6	4.26	3.3	0.64	0.93	2.09	2.37
2	60	1	2	1	0	0	135	85	83	19.1406	82	0	0	4.29	39.1	3.88	3.3	0.8	0.94	2.35	2.36
2	75	1	2	0	0	0	125	80	88	19.9219	80	0	0	4.7	54	3.2	3.3	1.5	1.2	2.3	2.1
2	72	1	2	1	0	0	125	80	88	24.6711	80	0	0	5.2	54	3.2	3.3	1.5	1.2	2.3	2.1
1	67	1	2	0	0	0	125	80	92	26.4915	88	0	0	4.5	65	4.4	3.3	1.2	1.2	1.56	2.1
2	51	1	2	0	0	0	125	75	86	27.3399	80	0	0	4.25	50.2	2.98	3.3	1.13	1.2	2.02	2.1
1	71	1	2	0	0	0	125	80	75	23.4586	84	0	0	4.5	54	3.2	3.3	1.5	1.2	2.3	2.1
1	68	2	2	0	0	0	125	80	84	27.1203	84	0	0	5.2	54	3.8	3.3	1.5	1.2	2.3	2.1
2	82	1	3	1	0	0	125	85	81	19.6167	98	0	0	4.8	34.8	4.2	3.3	1.07	1.21	1.94	2.09
2	52	1	2	1	0	0	125	95	92	27.8852	93	0	0	4.58	42.2	4.36	3.3	1.62	1.23	1.66	2.07
1	79	1	2	0	0	0	110	70	102	20.6905	68	0	0	4.71	54.7	6.47	3.3	0.94	0.87	2.16	2.43
1	80	1	2	0	0	0	130	75	87	20.1733	87	0	0	4.46	62.5	4.48	3.3	1.34	0.94	2.15	2.36
2	75	1	2	0	0	0	115	80	87	21.58	97	0	0	5.82	37.8	3.62	3.3	0.85	0.84	2.03	2.46
2	55	1	2	0	0	0	115	65	107	28.8889	69	0	0	4.52	47.4	5.84	3.3	1.06	0.88	1.95	2.42
1	71	1	2	1	0	0	125	75	90	31.8616	80	0	0	4.9	45	4.2	3.3	1.1	1.3	1.1	2
2	53	1	2	0	0	0	125	90	70	18.369	84	0	0	4.13	58.3	9.94	3.3	0.93	1.32	1.88	1.98
1	74	1	2	0	0	0	120	75	88	25.8761	80	0	0	5.2	65	4	3.3	1.2	1.4	1.5	1.9
1	77	1	2	0	0	0	125	85	105	24.4418	80	0	0	4.2	65	4.2	3.3	1.2	1.4	1.56	1.9
1	81	1	2	1	0	0	125	80	88	26.6749	80	0	0	5.1	65	4	3.3	1.2	1.4	1.5	1.9
2	64	1	3	0	0	0	125	80	88	23.1247	88	0	0	5.1	65	4	3.3	1.5	1.4	1.5	1.9
1	71	3	2	0	0	0	115	80	88	29.7056	80	0	0	5.1	65	4.2	3.3	1.1	1.4	1.56	1.9
1	73	1	2	1	0	0	125	80	98	27.4406	84	0	0	5.1	65	4.4	3.3	1.2	1.4	1.56	1.9
2	64	1	2	0	0	0	135	80	85	35.0589	80	0	0	4.6	65	4	3.3	1.2	1.4	1.5	1.9
1	81	1	2	0	0	0	125	80	76	27.3034	88	0	0	4.2	65	4.1	3.3	1.1	1.4	1.56	1.9
1	65	1	2	0	0	0	125	80	88	32.4619	84	0	0	4.5	65	4	3.3	1.2	1.4	1.5	1.9
1	69	1	2	0	0	0	125	80	85	24.3865	80	0	0	4.1	65	4	3.3	1.2	1.4	1.5	1.9
1	66	1	2	1	0	0	115	75	88	19.3337	88	0	0	4.8	65	4.4	3.3	1.2	1.4	1.5	1.9
1	83	1	2	0	0	0	130	85	88	21.4844	80	0	0	4.6	65	4.4	3.3	1.2	1.4	1.5	1.9
1	64	1	2	0	0	0	127.5	80	105	29.3848	84	0	0	5.1	65	4.4	3.3	1.2	1.4	1.56	1.9
2	78	1	2	0	0	0	125	80	86	25.0772	88	0	0	5.1	65	4.4	3.3	1.2	1.4	1.5	1.9
1	72	1	2	0	0	0	125	80	88	25.7812	84	0	0	4.5	65	4.4	3.3	1.2	1.4	1.5	1.9
1	81	1	2	1	0	0	125	80	88	26.5731	88	0	0	4.5	65	4.2	3.3	1.2	1.4	1.56	1.9
2	60	1	2	0	0	0	120	85	92	28.5375	84	0	0	4.18	42.8	2.61	3.3	1.13	0.96	2.4	2.34
2	57	1	2	0	0	0	125	75	98	32.039	67	0	0	4.73	37.1	3.24	3.3	0.82	0.93	2.45	2.37
1	78	1	2	1	0	0	125	65	98	22.0604	81	0	0	4.26	69.6	6.66	3.3	1.68	1.72	2.02	1.58
2	49	1	2	0	0	0	115	65	105	30.2978	89	0	0	4.86	44.4	4.85	3.3	1.16	0.91	2.37	2.39
2	63	2	3	0	0	0	125	75	98	34.5168	80	0	0	4.2	45	4.2	3.3	1.6	1.9	1.5	1.4
1	49	1	2	1	0	0	130	65	111	34.3506	70	0	0	5.53	62	6.54	3.3	0.52	1.95	1.13	1.35
2	49	3	2	1	0	1	135	80	87	25.8876	76	0	0	5.29	42.9	4.66	3.31	1.66	0.94	0.96	2.37
2	79	1	2	1	0	0	115	70	89	27.7671	95	0	0	6.82	52	4.4	3.31	0.86	0.97	1.25	2.34
1	71	1	2	0	0	0	105	65	71	20.1348	84	0	0	4.97	68	5.28	3.31	0.33	1.04	1.52	2.27
2	62	1	2	0	0	0	115	65	103	30.7004	80	0	0	4.21	42.9	4.86	3.31	1.05	1.05	2.3	2.26
1	53	1	2	0	0	0	105	65	92	27.0538	74	0	0	4.6	64	5.33	3.31	0.36	0.83	1.58	2.48
2	53	1	2	0	0	0	115	70	91	22.7694	88	0	0	5.6	69	3.72	3.31	0.53	1.09	1.32	2.22
1	57	1	2	1	0	1	105	75	92	28.9341	66	0	0	4.3	54.6	4.1	3.31	2.69	0.94	2.12	2.37
2	52	1	2	1	0	0	130	80	94	29.2184	79	0	0	4.17	39.4	6.81	3.31	0.77	1.11	2.2	2.2
2	64	1	2	0	0	0	125	85	87	24.1127	82	0	0	5.51	33.9	3.31	3.31	0.69	1.15	2.3	2.16
2	75	1	2	1	0	0	125	65	74	20.8247	81	0	0	4.41	42.8	4.98	3.31	1.14	1.16	2.04	2.15
2	60	1	2	1	0	0	105	60	88	15.3894	75	0	0	4.68	44.7	4.02	3.31	1.32	0.96	2.14	2.35
1	62	2	2	1	0	0	125	75	91	30.0914	80	0	0	4.35	84.3	5.42	3.31	1.12	0.54	2.14	2.77
2	60	1	2	0	0	0	125	65	85	22.8129	93	0	0	5.31	48	5.81	3.31	0.57	1.23	1.31	2.08
1	73	2	2	1	0	0	115	65	119	32.0499	84	0	0	6.31	48	5.81	3.31	0.58	1.23	1.31	2.08
1	55	1	2	0	0	0	115	80	103	29.7211	72	0	0	5.85	63.5	4.3	3.31	0.82	1.29	1.28	2.02
1	78	2	2	1	0	0	120	80	94	27.0842	93	0	0	5.45	57	5.56	3.31	0.21	1.3	1.04	2.01
1	69	1	2	1	0	0	105	70	86	22.6562	84	0	0	4.5	40.3	3.96	3.31	1.19	1.32	0.36	1.99
2	55	1	2	0	0	0	110	80	125	39.472	84	0	0	4.73	57.3	3.22	3.31	1.45	0.97	1.88	2.34
2	51	1	2	0	0	0	130	80	88	25.8166	84	0	0	4.9	42.1	7.15	3.31	0.56	1.45	1.94	1.86
1	50	1	2	0	0	0	115	75	90	26.6436	80	0	0	4.12	54.2	3.83	3.31	2.36	0.79	2.09	2.52
2	59	1	2	0	0	0	100	65	97	24.3418	77	0	0	5.87	27	4.79	3.31	1.63	1.63	1.61	1.68
1	50	1	2	0	0	0	130	80	111	34.3679	80	0	0	5.28	65.4	5.86	3.31	0.88	1.8	2.34	1.51
2	48	1	2	0	0	0	125	70	105	32.8889	82	0	0	4.43	40.5	4.81	3.31	0.87	1.82	2.35	1.49
1	83	1	2	1	0	0	115	75	85	22.3081	84	0	0	4.24	25.6	7.2	3.31	1.28	0.95	0.99	2.36
1	51	2	2	0	0	0	110	65	94	26.2976	82	0	0	4.2	74.7	6.2	3.32	0.86	1.01	2.33	2.31
1	51	1	2	0	0	0	105	65	84	23.533	84	1	0	6.56	61.6	5.4	3.32	1.21	0.92	2.05	2.4
2	49	1	2	1	0	1	130	85	95	23.833	97	0	0	11.96	59	3.88	3.32	0.35	1.02	1.46	2.3
1	49	2	2	0	0	0	125	85	110	31.2452	84	0	0	5.07	86.4	6.25	3.32	1.09	0.83	2.09	2.49
1	67	1	2	1	0	0	125	75	87	25.711	76	0	0	4.21	38.5	4.61	3.32	0.94	1.07	2.2	2.25
2	52	1	2	0	0	0	120	65	95	28.6726	72	0	0	4.71	45.4	4.65	3.32	1.39	1.1	2.04	2.22
2	54	2	2	0	0	0	105	75	74	23.5556	90	0	0	4.78	57.9	2.95	3.32	0.78	0.97	1.82	2.35
1	63	2	2	1	0	1	120	65	115	30.854	80	0	0	4.95	59.1	4.38	3.32	2.96	0.93	1.94	2.39
1	55	1	2	0	0	0	125	65	81	25.0995	67	1	0	4.12	43.5	3.14	3.32	1.69	1.12	0.12	2.2
2	49	1	2	0	0	0	95	60	103	24.3418	85	0	0	4.34	44	4.07	3.32	1.03	1.12	2.06	2.2
1	53	1	2	0	0	0	95	60	95	21.7778	85	0	0	4.01	64.6	6.58	3.32	0.51	1.13	1.92	2.19
2	57	1	2	0	0	0	95	60	98	18.1955	84	0	0	4.55	41.5	6.71	3.32	1.02	1.14	1.59	2.18
1	76	1	2	0	0	0	105	65	100	20.6575	76	0	0	4.49	62.4	7.42	3.32	0.87	1.16	2.33	2.16
1	53	1	2	0	0	0	115	75	71	20.4467	83	1	0	4.7	59.9	5.88	3.32	0.45	1.19	2.32	2.13
2	51	2	2	0	0	0	115	65	89	27.3034	74	0	0	4.67	45.4	3.56	3.32	1.33	1.23	1.2	2.09
2	52	1	2	0	0	0	115	75	85	22.3478	75	0	0	5.48	26.7	5.66	3.32	0.61	1.24	1.9	2.08
2	58	1	2	0	0	0	120	80	82	21.4844	84	0	0	4.8	41.5	6.21	3.32	0.8	1.31	2.05	2.01
1	75	1	2	1	0	0	125	85	95	29.7211	80	0	0	4.48	75.8	4.28	3.32	0.94	0.88	2.2	2.44
2	59	1	2	0	0	0	125	75	91	22.3081	81	0	0	4.21	50.5	5.42	3.32	0.7	1.34	1.96	1.98
1	58	1	2	0	0	0	125	70	96	22.4059	70	0	0	6.02	68	6.2	3.32	0.19	1.45	1.05	1.87
1	53	1	2	1	0	0	125	75	115	31.2295	84	0	0	4.56	55	4.69	3.32	2.77	0.77	2.05	2.55
2	55	2	2	0	0	0	110	60	81	24.3007	84	0	0	5.71	39.4	5.05	3.32	1.44	0.96	2.41	2.36
1	61	1	3	0	0	0	125	80	98	34.1542	82	0	0	4.54	53.6	5.37	3.32	0.89	0.6	2.04	2.72
2	60	1	2	1	0	0	125	85	104	29.0487	84	0	0	5.72	58.7	4.62	3.32	1.33	1.72	2.16	1.6
1	64	1	2	0	0	0	95	65	91	27.5873	66	0	0	5.65	63.2	5.2	3.32	1.49	1.81	2.14	1.51
2	54	1	2	0	0	0	120	90	96	25.3333	84	0	0	4.56	34.2	4.35	3.32	0.86	0.98	2.3	2.34
1	75	1	2	1	0	0	135	75	96	21.5139	80	1	0	4.32	62.5	5.24	3.33	0.9	0.82	2.3	2.51
1	70	1	2	0	0	0	125	65	93	23.4375	88	0	0	5.75	58	4.65	3.33	0.14	0.99	1.56	2.34
1	50	1	2	0	0	0	125	65	100	34.7807	75	0	0	4.54	73.9	6.5	3.33	0.66	1.04	2.3	2.29
1	50	1	2	0	0	0	95	75	74	21.8871	63	0	0	4.66	64.5	4.15	3.33	0.48	0.87	1.65	2.46
2	49	2	2	0	0	0	105	65	78	23.4224	71	0	0	4.1	43.9	3.56	3.33	1.18	0.97	1.95	2.36
2	48	2	2	0	0	0	105	65	79	19.3337	80	0	0	5.55	44.3	3.65	3.33	1.26	1.09	1.92	2.24
1	53	2	2	0	0	0	125	75	96	33.8817	76	0	0	4.49	69.1	5.48	3.33	1.38	1.1	1.2	2.23
1	83	2	2	0	0	0	125	70	95	25.6173	75	0	0	4.21	58.3	5.09	3.33	0.57	1.12	2.26	2.21
2	52	1	2	0	0	0	100	60	78	20.9275	70	0	0	5.79	69	3.77	3.33	0.23	0.5	0.5	2.83
2	49	1	2	0	0	0	100	65	83	20.8889	85	0	0	4.96	43.4	4.21	3.33	1.13	1.18	2.13	2.15
1	73	3	2	0	0	0	115	75	98	23.1206	83	0	0	4.12	59.3	5.59	3.33	0.99	1.19	2.06	2.14
1	52	1	2	0	0	0	115	75	91	26.9598	82	0	0	4.64	60.9	4.37	3.33	0.65	0.89	2.1	2.44
2	52	1	2	0	0	0	120	85	75	21.6441	82	0	0	5.76	51.3	5.01	3.33	0.71	1.21	2.32	2.12
2	71	1	2	1	0	1	125	85	94	25.6837	71	0	0	12.43	76.4	6.55	3.33	1.09	1.22	2.03	2.11
2	49	1	2	0	0	0	105	70	75	24.9199	80	0	0	4.57	50.7	5.2	3.33	0.64	1.24	2.07	2.09
2	65	1	2	0	0	0	125	75	110	32.0312	71	0	0	4.64	51	5.64	3.33	1	1.24	2.58	2.09
2	79	1	3	1	0	0	115	75	82	22.6667	88	0	0	3.97	24.2	4.14	3.33	1.84	0.73	2.27	2.6
2	54	1	2	0	0	0	115	65	88	31.1634	82	0	0	4.22	44.1	5.48	3.33	1.15	1.26	1.88	2.07
1	69	1	2	0	0	0	105	90	92	28.0102	67	0	0	4.6	63	4.47	3.33	0.16	1.32	1.09	2.01
1	53	1	2	0	0	0	130	65	87	25.3069	85	0	0	5.21	53.6	5.15	3.33	6.75	0.41	1.68	2.92
2	68	1	2	1	0	0	125	80	98	18.9745	68	0	0	4.5	36.2	4.66	3.33	2.52	0.93	2	2.4
1	61	2	2	0	0	0	115	60	94	20.9572	84	0	0	4.53	65.1	4.94	3.33	1.08	0.9	2.19	2.43
1	71	1	2	0	0	0	135	65	117	40.0091	96	0	0	3.91	75.5	3.25	3.33	1.46	0.89	2.79	2.44
2	73	1	3	1	0	0	115	75	86	23.9257	92	0	0	6.49	46.8	5.77	3.33	0.85	1.76	2.06	1.57
2	52	1	2	1	0	0	135	75	104	27.5556	75	0	0	3.99	58.1	4.3	3.33	0.87	1.82	2.02	1.51
2	23	2	1	0	0	0	115	65	84	21.2279	80	0	0	4.18	14.5	4.46	3.33	1.07	0.85	1.88	2.48
2	50	1	2	0	0	0	105	60	86	24.4646	84	0	0	5.1	44	5.11	3.34	1.14	1.02	1.89	2.32
2	56	1	2	0	0	0	115	75	71	20.6905	84	0	0	4.47	37.8	5.38	3.34	0.94	0.96	1.89	2.38
1	56	1	2	0	0	0	110	65	86	24.3418	84	0	0	4.51	43.8	4.48	3.34	0.96	1.06	1.81	2.28
1	50	2	2	0	0	0	105	70	102	26.8136	84	0	0	19.08	47.2	4.27	3.34	0.84	1.07	2	2.27
1	52	1	2	0	0	0	105	65	89	19.1327	60	0	0	4.72	52.6	4.03	3.34	1.21	1.07	1.98	2.27
2	54	1	3	1	0	0	105	65	99	25.8761	78	0	0	4.87	42.6	2.26	3.34	1.66	1.11	2.04	2.23
1	51	1	2	0	0	0	115	75	87	29.4118	81	0	0	5.11	59.5	5.13	3.34	2.63	0.7	2.21	2.64
2	54	1	2	0	0	0	115	75	95	26.5754	76	0	0	4.1	33.7	3.01	3.34	1.03	1.12	2.16	2.22
2	65	1	2	0	0	0	105	65	71	16.8475	78	0	0	5.82	44	4.41	3.34	1.7	0.98	2.2	2.36
2	65	1	2	1	0	0	115	75	96	27.3438	83	0	0	4.31	52.8	3.75	3.34	2.11	0.79	1.84	2.55
1	57	1	2	0	0	0	115	65	67	21.3333	88	0	0	6.63	60	5.98	3.34	0.59	0.98	2.17	2.36
1	55	1	2	0	0	0	120	75	95	20.4783	86	0	0	4.74	57.8	5.73	3.34	0.72	1.35	1.86	1.99
2	55	1	2	1	0	0	115	65	97	24.1965	84	0	0	5.77	57	6.85	3.34	0.88	1.42	1.76	1.92
1	79	1	2	0	1	0	115	75	103	28.6851	80	0	0	4.7	50.6	4.34	3.34	2.5	0.99	1.87	2.35
2	87	1	2	0	0	0	130	95	86	25.8065	88	0	0	4.33	68.5	4.41	3.34	1.06	2.5	1.5	0.84
2	52	1	2	0	1	0	115	75	83	23.6013	89	0	0	4.72	30.6	5.46	3.35	0.72	0.8	1.39	2.55
1	53	1	2	0	0	0	125	75	121	31.2213	95	0	0	5.67	63.8	5.81	3.35	0.79	1.01	1.97	2.34
1	51	2	2	0	0	0	115	75	95	23.7332	84	0	0	4.24	69	4.17	3.35	0.99	0.96	2.22	2.39
2	68	1	2	1	0	0	130	75	103	32.8473	84	0	0	4.11	46.9	6.56	3.35	1.6	0.94	1.84	2.41
1	52	1	2	0	0	0	125	70	101	28.1625	75	0	0	5.27	84	4.14	3.35	0.32	0.98	1.28	2.37
1	60	2	2	0	0	0	125	85	83	21.7738	85	0	0	4.24	55.2	4.53	3.35	1.38	1.13	2.1	2.22
1	79	1	2	0	0	0	115	65	98	22.7732	90	0	0	4.16	74.4	7.52	3.35	0.81	0.92	2.51	2.43
1	54	1	2	0	0	0	130	80	88	27.2392	83	0	0	4.79	43.6	8.05	3.35	1.21	0.86	2.45	2.49
1	57	1	2	0	0	0	120	65	126	36.264	72	0	0	4.41	68.3	4.44	3.35	1.34	0.87	2.38	2.48
1	57	1	2	0	0	0	105	60	92	23.1473	75	0	0	4.76	83.5	5.38	3.35	1.03	1.22	2.05	2.13
1	54	1	2	0	0	0	90	65	80	27.0051	60	0	0	5.48	55.9	5.34	3.35	0.82	0.94	0.96	2.41
2	56	1	2	0	0	0	120	80	94	27.8876	86	0	0	5.28	47	6.21	3.35	0.7	1.26	1.04	2.09
1	56	1	2	0	0	0	105	75	100	22.9481	80	0	0	4.54	57.2	5.62	3.35	1.09	0.92	2.43	2.43
2	48	1	2	0	0	0	120	85	108	26.1962	74	0	0	4.79	60.2	5	3.35	1.2	0.92	2.09	2.43
2	79	2	3	1	0	0	125	80	88	34.1542	80	0	0	5.2	67	4.2	3.35	1.2	1.4	1.5	1.95
2	68	1	2	0	0	0	125	80	86	18.0172	80	0	0	5.1	65	4.4	3.35	1.1	1.4	1.5	1.95
2	71	1	2	1	0	0	125	85	87	22.0604	80	0	0	5.1	65	4.49	3.35	1.2	1.4	1.56	1.95
1	76	1	2	0	0	0	125	80	86	22.4323	88	0	0	4.6	65	4.4	3.35	1.2	1.4	1.5	1.95
1	69	1	2	0	0	0	125	80	88	22.7732	80	0	0	5.1	65	4.2	3.35	1.2	1.4	1.56	1.95
2	72	2	2	0	0	0	115	80	92	25.7812	84	0	0	4.5	65	4.4	3.35	1.2	1.4	1.5	1.95
1	55	1	3	0	0	0	125	65	100	22.1297	81	0	0	4.28	68.1	5.36	3.35	0.42	1.4	1.87	1.95
1	86	1	2	0	0	0	115	80	85	25.0657	80	0	0	5.1	65	4.4	3.35	1.6	1.4	1.5	1.95
1	77	1	2	0	0	0	125	65	90	21.0517	77	0	0	5.1	67.4	4.49	3.35	0.6	1.4	1.56	1.95
2	68	1	2	1	0	0	120	75	88	27.0408	84	0	0	5.2	67	4.49	3.35	1.2	1.4	1.54	1.95
2	69	2	2	1	0	0	125	80	88	30.6293	88	0	0	4.1	65	4	3.35	1.2	1.4	1.56	1.95
2	65	1	2	0	0	0	115	80	88	23.3067	80	0	0	5.1	65	4.4	3.35	1.2	1.4	1.56	1.95
2	64	2	2	0	0	0	125	80	85	40.1555	84	0	0	4.2	65	4.4	3.35	1.2	1.4	1.56	1.95
2	64	1	3	0	0	0	115	80	75	19.3821	75	0	0	5.06	67.4	4.49	3.35	0.6	1.4	1.56	1.95
2	65	1	2	1	0	0	125	80	80	29.9376	88	0	0	4.2	65	4.49	3.35	1.2	1.4	1.56	1.95
2	87	1	2	0	0	0	125	80	85	22.83	80	0	0	4.2	65	4.4	3.35	1.2	1.4	1.56	1.95
1	78	1	2	1	0	1	130	85	88	30.1788	88	0	0	4.3	65	4.4	3.35	1.2	1.4	1.56	1.95
2	49	1	2	0	0	0	115	75	85	26.8977	80	0	0	4.7	55.1	4.35	3.35	5.26	0.41	1.5	2.94
1	49	1	2	0	0	0	110	75	87	24.2188	74	0	0	4.01	46	5.23	3.35	0.12	1.5	1.01	1.85
1	48	2	2	0	0	0	120	75	106	31.2452	84	0	0	5.84	77.1	6.55	3.35	0.85	0.75	2.76	2.6
1	76	1	2	1	0	0	115	75	74	33.1777	80	0	0	4.99	37.8	4.79	3.35	2.03	0.91	0.98	2.44
1	60	1	2	0	0	0	115	75	94	32.5964	84	1	0	5.42	80.4	3.1	3.35	1.47	1.79	2.67	1.56
2	54	1	2	0	0	0	110	75	104	31.2026	84	0	0	4.94	48.2	3.55	3.35	1.6	1.8	2.18	1.55
1	69	1	2	1	0	1	115	75	89	26.6749	84	0	0	5.79	52.2	7.11	3.35	4.74	0.9	2.26	2.45
2	62	1	2	0	0	0	115	75	113	38.5215	84	0	0	4.79	40.8	5.14	3.35	0.62	1.9	2	1.45
1	60	1	2	0	0	0	115	65	92	20.83	80	0	0	5.39	56.2	6.47	3.36	1.3	1	2.3	2.36
1	49	1	2	0	0	1	130	75	80	31.8616	78	0	0	10.58	52.4	4.74	3.36	1.42	0.52	1.99	2.84
1	51	1	2	0	0	0	130	75	87	32.3884	75	0	0	4.01	52.4	3.6	3.36	0.85	1.05	2.38	2.31
1	58	1	2	0	0	0	115	65	113	21.4109	70	0	0	4.37	79.6	6.43	3.36	0.71	1.06	2.1	2.3
2	69	1	2	1	0	0	135	75	94	27.5873	88	0	0	4.89	42.5	5.11	3.36	1.38	1.09	2.08	2.27
2	68	1	2	1	0	0	135	85	78	23.3091	82	0	0	4.41	42	4.13	3.36	0.73	0.94	2.34	2.42
1	54	1	2	0	0	0	125	75	102	21.6713	82	1	0	4.03	59	0.93	3.36	0.91	1.13	2.36	2.23
1	75	1	2	0	0	1	125	75	110	25.7657	70	0	0	6.05	66	4.09	3.36	0.29	0.85	1.5	2.51
1	75	1	2	0	0	0	135	75	75	22.68	75	0	0	4.96	89	3.07	3.36	0.67	1.17	1.7	2.19
2	49	1	2	0	0	0	115	75	90	26.5643	80	0	0	4.53	47	4.88	3.36	2.27	0.96	1.87	2.4
2	62	1	2	1	0	0	145	85	90	25.1096	82	0	0	5.17	73	4.23	3.36	0.26	1.23	1.17	2.13
1	67	2	2	1	0	0	125	65	122	33.9844	68	0	0	5.01	50.6	5.91	3.36	0.81	1.27	2.01	2.09
2	67	1	3	1	0	0	105	70	59	28.9993	80	0	0	5.01	50.6	5.91	3.36	0.81	1.27	2.01	2.09
2	59	1	2	0	0	0	105	65	77	22.5069	90	0	0	4.52	63.3	6.35	3.36	0.56	1.28	2.06	2.08
2	57	1	2	1	0	1	130	75	72	24	84	0	0	19.71	32.7	7.68	3.36	1.2	1.32	1.76	2.04
1	56	1	2	0	0	0	95	65	81	22.9481	86	0	0	5.47	60.8	5.24	3.36	1.18	0.88	2.02	2.48
2	48	3	2	0	0	0	105	65	69	21.0828	76	0	0	4.74	33.6	5.15	3.36	0.7	1.54	1.68	1.82
1	54	1	2	1	0	0	105	65	106	29.7265	72	0	0	4.92	67.8	7.16	3.36	1.23	1.69	2.19	1.67
2	51	2	2	0	0	0	115	75	83	26.7532	83	0	0	4.54	27.3	2.98	3.36	1.57	0.92	2.1	2.44
1	57	1	2	0	0	0	115	85	87	29.5525	84	0	0	4.08	82	9.95	3.36	0.42	0.87	1.58	2.49
1	55	1	2	0	0	0	145	80	98	24.5603	84	0	0	5.27	79.8	7.34	3.36	0.44	2.1	2.3	1.26
1	48	1	2	1	0	0	105	65	76	22.719	84	1	0	5.34	45.8	6.72	3.37	1.21	0.88	2.33	2.49
1	48	1	3	0	0	0	120	70	78	28.6288	85	0	0	4.91	67.3	5.44	3.37	0.96	1.03	2.37	2.34
1	54	1	2	0	0	0	130	75	90	29.6158	88	0	0	4.28	45.9	3.48	3.37	1.46	0.87	1.92	2.5
1	50	1	2	1	0	0	115	55	115	29.7619	110	0	0	5.8	73.3	4	3.37	1.46	1.04	2.15	2.33
1	54	2	2	0	0	0	110	65	116	28.3266	84	0	0	4.04	47.8	5.43	3.37	0.73	1.04	2.24	2.33
1	64	1	2	0	0	0	135	75	90	22.7615	90	0	0	5.13	80.5	6.25	3.37	0.74	1.08	2.27	2.29
2	50	1	2	0	0	0	120	75	95	26.8977	80	0	0	4.41	34.6	4.5	3.37	1.41	1.08	2.28	2.29
2	70	2	2	0	0	0	105	70	80	20.83	84	0	0	4.3	51.6	5.31	3.37	2.05	1.15	1.92	2.22
2	72	1	2	1	0	1	125	65	85	23.9796	84	0	0	5.45	51.6	5.31	3.37	2.05	1.15	1.92	2.22
2	54	1	2	0	0	0	115	75	86	21.9076	64	0	0	4.5	39.3	4.64	3.37	1.23	1.16	2.18	2.21
2	61	1	2	0	0	0	105	65	91	23.1911	91	0	0	5.62	36.8	4.71	3.37	0.92	1.17	2.29	2.2
2	59	1	2	1	0	0	130	75	90	35.1562	66	0	0	6.42	35.4	4.63	3.37	0.65	0.82	2.31	2.55
1	59	1	2	0	0	0	110	65	76	21.2803	70	0	0	4.17	70.2	8.39	3.37	0.83	1.23	2.11	2.14
2	53	1	2	0	0	0	110	75	112	34.6667	84	0	0	4.5	40.6	3.07	3.37	1.02	1.27	2.18	2.1
2	48	1	2	0	0	0	105	65	68	21.6441	88	0	0	4.54	35.6	4.22	3.37	1.19	1.28	2.1	2.09
1	53	1	2	1	0	0	105	65	100	34.1401	82	0	0	4.54	35.6	4.22	3.37	1.19	1.28	2.1	2.09
2	64	1	2	1	1	0	105	70	75	24.5949	84	0	0	4.59	29.5	6.77	3.37	1.16	1.31	1.98	2.06
2	59	2	2	1	0	0	135	75	112	33.1777	88	0	0	19.69	55.2	4.22	3.37	0.71	1.32	1.23	2.05
2	52	1	2	0	0	0	115	75	102	32.8392	84	0	0	3.95	29.7	4.55	3.37	1.01	1.32	1.93	2.05
1	52	1	2	0	0	0	110	65	85	29.4078	95	0	0	5.34	45.8	6.72	3.37	1.21	0.88	2.33	2.49
2	52	1	2	0	0	0	115	85	81	26.1427	80	0	0	4.03	25.2	6.44	3.37	1.08	0.89	1.38	2.48
1	61	2	2	0	1	1	115	75	78	21.048	82	1	1	4.95	55.9	3.59	3.37	1.31	1.42	1.51	1.95
2	48	1	2	0	0	0	115	75	86	26.8977	82	0	0	3.99	59.4	2.75	3.37	0.77	0.98	2.17	2.39
1	67	1	2	0	0	0	125	75	103	25.3902	72	0	0	5.03	12.5	3.07	3.37	1.24	0.89	2.52	2.48
1	57	1	2	0	0	0	115	75	76	18.902	84	1	0	5.32	49	4.6	3.37	0.45	1.49	1.08	1.88
2	51	1	2	0	0	0	110	70	112	34.8502	80	0	0	4.93	40.9	3.33	3.37	1.04	1.53	2.17	1.84
1	51	1	2	0	0	0	135	75	120	39.1837	79	1	0	5.58	80.9	4.71	3.37	0.97	0.96	2.5	2.41
1	57	1	2	0	0	0	125	75	99	23.3556	82	1	0	4.42	59.2	3.73	3.37	0.66	0.97	2.08	2.4
1	76	1	2	1	0	0	100	70	92	25.2363	68	0	0	4.1	80.5	4.12	3.37	0.83	0.9	1.91	2.47
2	50	2	2	0	0	0	125	85	105	23.1473	74	0	0	5.77	44	3.65	3.38	0.3	1	1.21	2.38
1	72	1	2	1	0	1	125	75	98	29.7458	80	0	0	4.25	68.8	6.13	3.38	1.06	1.01	2.12	2.37
2	49	1	2	0	0	0	95	60	79	28.1479	76	0	0	4.62	45.4	3.06	3.38	1.43	1.01	2.43	2.37
2	73	1	3	1	0	1	125	65	95	28.6288	80	0	0	5.22	46	4.93	3.38	0.5	0.86	1.89	2.52
2	50	1	2	1	0	0	125	95	90	28.6726	84	0	0	4.59	46.6	3.72	3.38	1.36	1.1	1.89	2.28
2	65	1	2	0	0	1	110	75	80	21.0517	80	0	0	4.5	49.6	3.99	3.38	0.74	1.1	0.7	2.28
1	75	1	2	1	0	0	135	75	86	25.6055	93	0	0	5.63	65.4	8.98	3.38	1.28	0.98	1.25	2.4
2	66	1	2	0	0	0	115	65	98	22.9398	87	0	0	4.33	25.6	3.28	3.38	1.39	1.14	0.95	2.24
1	64	1	2	1	0	0	120	75	102	31.6337	85	0	0	5.96	79.2	4.67	3.38	0.95	0.92	2.3	2.46
2	23	2	1	0	0	0	105	65	88	20.7967	84	0	0	4.18	36.9	6.38	3.38	0.56	1.17	1.87	2.21
2	49	1	2	1	0	0	135	105	90	22.7694	66	0	0	5.57	43	4.6	3.38	0.1	1.21	1.84	2.17
1	72	1	2	0	0	0	125	75	90	26.5625	84	0	0	4.83	38.2	6.56	3.38	0.62	1.22	2.19	2.16
2	52	1	2	0	0	0	115	85	90	32.8933	79	0	0	5.38	32.9	3.64	3.38	0.93	1.24	1.91	2.14
2	49	1	2	0	0	0	115	65	100	28.441	84	0	0	4.78	35.6	4.88	3.38	3.38	0.95	2.18	2.43
1	57	1	2	0	0	0	115	75	92	24.977	84	0	0	3.97	63.3	5.7	3.38	0.77	0.91	2.46	2.47
1	50	2	2	0	0	0	135	75	105	28.7268	84	0	0	4.57	54.7	4.95	3.38	1.45	1.59	2.5	1.79
1	52	2	2	0	0	0	105	65	85	26.4024	88	0	0	4.54	69.3	4.53	3.38	1.08	1.72	2.3	1.66
2	59	1	2	0	0	0	115	75	105	31.7397	82	0	0	4.29	71.7	6.1	3.38	0.76	1.74	2.38	1.64
2	53	1	2	0	0	0	125	75	93	23.1247	86	0	0	4.71	48.9	4.1	3.39	1.24	0.97	2.44	2.42
2	58	1	2	0	0	0	135	65	94	28	67	0	0	4.39	34.8	5.93	3.39	1.26	1.01	2.3	2.38
1	61	1	2	0	0	0	105	65	91	29.4076	82	0	0	5.21	59	7.14	3.39	0.16	1.02	1.15	2.37
2	48	2	2	0	0	0	115	75	99	29.7056	80	0	0	4.56	46.2	3.6	3.39	1.02	1.05	2.1	2.34
2	69	1	2	1	0	0	110	80	82	22.6409	84	0	0	5.2	50.1	2.79	3.39	1.37	1.06	2.02	2.33
1	73	1	2	1	0	1	125	85	81	18.5568	84	0	0	16.5	54.5	4.38	3.39	1.13	1.06	2.16	2.33
1	60	1	2	0	0	0	95	65	81	24.6094	67	0	0	5.7	49.6	5.93	3.39	0.93	1.06	2.14	2.33
2	70	1	3	0	0	0	90	60	98	24.8016	84	0	0	5.63	76.1	5.08	3.39	1.06	0.9	2.16	2.49
2	62	1	2	0	0	0	100	65	88	22.0741	88	0	0	6.38	58	4.56	3.39	0.32	1.07	1.24	2.32
1	65	1	2	0	0	0	115	70	104	27.5312	91	0	0	5.56	70.9	4.34	3.39	1.66	1.07	1.94	2.32
1	60	2	3	0	0	0	120	75	103	33.0579	80	0	0	4.75	75.7	5.66	3.39	1.1	1.09	2.2	2.3
1	64	3	2	1	0	0	130	75	91	26.8923	69	0	0	3.93	60.5	4.7	3.39	0.87	0.91	2.51	2.48
1	55	1	2	0	0	0	125	75	88	24.3911	84	0	0	4.73	54.4	9.6	3.39	1.45	1.13	2.04	2.26
1	53	2	2	1	0	0	135	75	106	36.0854	68	0	0	5.21	81	6.25	3.39	1.45	1.18	1.99	2.21
2	60	1	2	0	0	0	120	85	109	32.7644	83	0	0	4.1	51	3	3.39	0.3	0.81	1.61	2.58
2	48	2	2	0	0	0	115	70	92	24.0346	73	0	0	3.94	44.4	4.78	3.39	1.14	0.93	2.41	2.46
1	68	1	2	0	0	0	115	65	94	21.6128	70	0	0	4.61	72.6	7.87	3.39	0.62	1.26	2.21	2.13
2	61	1	3	1	0	0	125	75	75	18.9745	84	0	0	4.3	57	5.16	3.39	0.68	1.26	1.18	2.13
2	65	2	2	0	0	0	130	85	101	27.2096	84	0	0	4.67	50	2.83	3.39	1.04	1.26	2.22	2.13
1	78	1	2	0	0	0	105	70	86	19.7777	80	0	0	4.7	29	7.49	3.39	0.69	1.27	1.75	2.12
1	58	2	2	0	0	1	120	75	82	31.5721	70	0	0	4.81	42.9	5.12	3.39	1.11	1.28	2.06	2.11
1	67	1	2	1	0	1	125	75	87	23.6244	72	0	0	3.9	63.7	4.19	3.39	1.62	0.93	1.91	2.46
2	78	1	2	1	0	0	155	90	95	27.8852	88	0	0	4.44	60.4	3.72	3.39	0.99	0.93	2.38	2.46
1	52	1	2	0	0	0	115	75	109	31.0204	78	0	0	4.63	56.4	4.84	3.39	0.92	0.93	2.16	2.46
1	68	1	2	0	0	0	120	65	89	22.8374	85	0	0	4.43	51	6.63	3.39	0.71	1.47	1.91	1.92
2	63	1	2	0	0	0	125	65	98	30.3593	77	0	0	4.32	45.7	4.38	3.39	0.98	0.72	2.12	2.67
2	52	1	2	0	0	0	125	85	85	25.5588	84	0	0	4.64	34.6	5.72	3.39	1.67	1.51	1.66	1.88
2	81	1	2	1	0	0	135	90	80	28.7619	87	0	0	4.23	65.5	4.76	3.39	1.52	0.85	2.33	2.54
1	57	1	2	0	0	0	115	65	110	26.2227	83	0	0	5.31	58.4	4.38	3.39	0.74	0.97	2.08	2.42
2	55	1	2	0	0	0	125	85	78	30.1788	82	0	0	5.1	49.2	3.34	3.39	1	0.95	2.25	2.44
1	58	1	2	0	1	0	125	75	97	26.4915	82	0	0	4.18	66.5	4.72	3.39	0.72	1.81	2.17	1.58
1	73	1	2	1	0	1	130	80	87	32.4675	76	0	0	4.87	62	4.38	3.4	1	0.95	2.65	2.45
2	78	1	2	0	0	0	115	85	104	28.8275	99	0	0	6.4	96	5.49	3.4	0.31	1.01	1.38	2.39
1	64	1	2	1	0	0	135	75	121	37.1135	82	0	0	6.33	59.3	6.1	3.4	1.05	1.01	2.11	2.39
1	53	2	3	0	0	0	125	75	92	32.3884	88	0	0	3.96	72.8	5.09	3.4	1.04	0.93	2.1	2.47
2	54	2	2	0	1	0	125	95	91	27.6304	99	0	0	5.04	68	4.05	3.4	0.24	1.03	1.02	2.37
2	50	1	2	0	0	0	95	65	114	33.9125	84	0	0	4.37	59.4	4.62	3.4	1.29	1.04	1.95	2.36
1	56	1	2	1	0	0	115	75	100	24.0055	82	0	0	4.62	45.6	5.64	3.4	1.09	0.85	2.53	2.55
2	62	2	2	0	0	0	110	65	85	27.4714	84	0	0	6.44	50.2	3.97	3.4	1.13	1.17	1.89	2.23
2	54	1	2	0	0	0	125	85	115	33.2265	87	0	0	4.59	54.3	3.24	3.4	2.28	0.87	2.48	2.53
2	75	1	2	1	0	0	105	80	96	22.3478	68	0	0	5.94	43.7	4.34	3.4	0.64	1.22	2.12	2.18
2	49	1	2	0	0	0	115	80	96	34.9277	87	0	0	5.17	50	5.7	3.4	0.27	1.23	1.85	2.17
2	55	1	2	0	0	0	115	75	90	23.1247	96	0	0	5.69	52.6	5.08	3.4	1.37	1.23	2.12	2.17
1	65	1	2	0	0	0	115	75	103	25.4581	88	0	0	5.13	52.1	6.41	3.4	0.97	0.84	2.41	2.56
1	55	1	2	0	0	0	120	80	87	22.6003	82	0	0	4.95	70.1	6.41	3.4	0.87	0.9	2.05	2.5
1	57	1	2	0	0	0	125	80	118	31.975	75	1	0	5.7	81	3.4	3.4	0.17	0.88	1.78	2.52
1	56	1	2	0	0	0	125	75	90	29.9967	90	0	0	4.27	273.4	13	3.4	1.23	1.3	2.02	2.1
1	71	1	2	0	0	0	125	75	96	28.2284	84	0	0	4.85	69.4	4.97	3.4	1.32	0.91	2.14	2.49
1	57	1	2	0	0	0	115	65	102	27.3982	88	0	0	5.23	61.2	4.46	3.4	1.24	0.65	2.7	2.75
2	73	1	2	1	0	0	125	85	74	19.8347	84	0	0	4.4	35	2.3	3.4	2.1	1.4	1.8	2
2	71	1	3	1	1	0	145	85	90	26.4792	78	0	0	5.2	46	3.2	3.4	1.1	0.8	2.1	2.6
2	49	2	2	0	0	0	110	75	90	35.7495	80	0	0	5.01	47.8	3.22	3.41	0.84	1	2.29	2.41
1	56	2	2	0	0	0	125	75	91	33.5315	70	0	0	5.57	71	6.74	3.41	0.52	1	1.37	2.41
1	62	1	2	0	0	0	115	75	90	26.1719	82	1	0	5.4	62	6.23	3.41	0.46	1.01	1.38	2.4
2	51	2	2	0	0	0	115	75	92	27.3923	100	0	0	4.59	65.8	5.21	3.41	0.9	1.03	2.18	2.38
2	50	2	2	0	0	1	115	80	103	36.5087	84	0	0	10.02	38.5	4.11	3.41	1.09	0.9	2.19	2.51
2	55	1	2	0	0	0	105	90	105	33.2671	82	0	0	5.27	46.7	3.21	3.41	1.11	1.04	2.03	2.37
1	69	1	2	0	0	0	125	80	94	27.5312	81	0	0	4.75	47	6.17	3.41	0.81	1.05	2.28	2.36
2	52	1	2	0	0	0	110	75	95	28.0618	64	0	0	5.28	56.9	6.25	3.41	1.69	1.05	2.01	2.36
1	51	1	2	0	0	0	125	60	99	26.0276	78	0	0	5.05	67	5.16	3.41	0.71	1.06	1.32	2.35
1	52	1	2	0	0	0	115	65	118	23.5294	80	0	0	5.81	70	5.81	3.41	0.17	1.06	1.32	2.35
1	72	2	2	0	0	0	135	85	130	30.863	76	0	0	7.5	53.1	4.44	3.41	0.52	0.99	2.1	2.42
2	50	1	2	1	0	0	100	80	78	30.3819	76	0	0	4.66	31	4.66	3.41	0.83	1.08	2.48	2.33
1	51	1	2	0	0	0	100	75	88	26.7036	75	1	0	5.05	51.1	5.04	3.41	0.71	0.8	2.38	2.61
2	53	1	2	0	0	0	120	85	99	25.0657	83	0	0	4.12	48	1.98	3.41	0.56	1.1	1.27	2.31
2	55	1	2	0	0	0	105	75	87	24.6548	78	0	0	4.64	59.8	6.5	3.41	0.65	1.1	2.31	2.31
1	52	1	2	0	0	0	115	65	84	23.6244	83	0	0	6.44	76	5.72	3.41	0.13	0.96	1.38	2.45
1	68	1	2	1	0	0	115	80	91	23.74	78	0	0	6.16	63	5.21	3.41	0.52	1.15	1.45	2.26
1	58	1	2	0	0	0	135	60	100	26.1738	71	0	0	5.16	63	5.21	3.41	0.52	1.15	1.45	2.26
2	69	1	2	0	0	0	95	65	90	17.898	84	0	0	5.85	68.1	4.8	3.41	0.68	1.17	1.85	2.24
1	58	1	2	0	0	0	115	75	82	22.1453	90	0	0	4.17	57.3	4.64	3.41	0.57	1.17	1.99	2.24
2	50	1	2	0	0	1	125	95	112	25.4581	80	0	0	6	52.5	3.92	3.41	2.19	0.66	2.52	2.75
1	77	1	2	1	0	0	135	75	84	19.5965	88	0	0	5.2	69.7	4.01	3.41	0.77	0.97	2.1	2.44
1	86	1	2	1	0	0	115	65	98	21.0667	84	0	0	4.78	61.6	5.12	3.41	1	0.93	2.17	2.48
1	64	1	2	1	0	0	125	65	99	32.8889	80	0	0	4.42	34.9	5.6	3.41	0.86	1.3	1.2	2.11
1	54	1	2	0	0	0	120	75	86	26.3329	65	0	0	4.89	55	4.53	3.41	0.96	0.95	2.29	2.46
2	59	2	2	0	0	0	110	75	92	36.4444	85	0	0	4.55	45.7	4.4	3.41	1.23	0.94	0.96	2.47
2	63	3	2	1	0	0	135	75	91	21.7993	84	0	0	6.12	63.3	4.75	3.41	1.62	1.4	1.06	2.01
1	71	1	2	0	0	1	125	75	94	27.2932	84	0	0	6.18	63.3	7.64	3.41	0.36	1.68	2.41	1.73
2	71	1	3	0	0	0	105	65	76	23.6304	87	0	0	4.97	35	4.49	3.41	1.08	1.69	1.45	1.72
1	51	2	2	0	0	0	115	75	101	28.0102	84	0	0	4.49	57	5.1	3.41	1.59	1.79	2.58	1.62
2	57	1	2	0	0	0	105	65	78	24.3865	75	0	0	4.73	45.9	3.76	3.41	1.52	1.8	2.5	1.61
1	67	1	2	1	0	1	145	85	116	28.7347	84	0	0	13.08	54	3.09	3.41	1.71	1.82	1.8	1.59
2	49	1	2	0	0	0	120	85	80	29.9376	84	0	0	5.24	71.7	4.84	3.41	1.45	1.82	2.17	1.59
2	70	1	2	1	0	0	125	85	97	30.8012	88	0	0	4.7	51.2	5.6	3.41	1.21	0.99	2.33	2.42
1	71	1	2	0	0	1	120	75	104	22.6562	85	0	0	4.74	52	7.12	3.42	0.78	1.02	2.28	2.4
1	52	2	2	0	0	0	105	75	97	24.5243	82	0	0	4.39	62.4	3.84	3.42	1.52	1.04	2.36	2.38
2	52	1	2	0	0	0	125	85	102	29.5525	84	0	0	4.48	46.9	6.48	3.42	0.51	1.04	2.28	2.38
1	62	2	2	1	0	0	125	75	109	30.7599	88	0	0	4.92	65.7	7.37	3.42	1	0.84	2.39	2.58
2	51	1	2	0	0	0	115	75	78	22.3478	76	0	0	4.79	56	5.1	3.42	1.66	1.05	2.22	2.37
1	68	2	2	0	0	0	125	75	110	26.2188	75	0	0	5.14	65.2	5.03	3.42	0.6	1.06	2.13	2.36
2	62	1	2	0	0	0	125	85	88	25.7778	82	0	0	4.84	43.7	4.06	3.42	1.38	1.09	2.26	2.33
2	54	1	2	0	0	0	125	65	98	25.1532	81	0	0	4.04	46.2	4.35	3.42	0.86	1.12	1.88	2.3
1	54	1	2	0	0	0	130	75	85	24.1288	75	0	0	4.54	46.8	6.82	3.42	1.2	1.12	1.11	2.3
2	62	1	2	1	0	0	105	70	90	24.6094	84	0	0	4.53	47	4.42	3.42	1.66	0.83	2.18	2.59
1	53	1	2	0	1	0	120	80	88	25	85	0	0	4.68	50.2	4.63	3.42	1.52	1.17	2.16	2.25
2	50	1	2	0	0	0	135	85	97	30.4705	80	0	0	5.21	45	2.83	3.42	0.75	1.23	2.08	2.19
1	51	1	2	0	0	0	135	70	87	18.4965	82	1	0	6.34	76	5.91	3.42	0.12	1.23	1.3	2.19
1	69	1	2	0	0	0	105	60	108	34.1598	84	0	0	5.02	35.3	4.26	3.42	0.79	1.24	2.58	2.18
1	76	1	2	1	0	0	105	65	78	21.7778	76	0	0	5.15	47.1	5.97	3.42	0.43	1.28	2.18	2.14
1	55	1	2	1	0	0	115	75	88	31.1111	84	0	0	5.02	48.2	5.31	3.42	2.26	0.86	2.42	2.56
2	53	1	2	1	0	0	125	65	80	21.7555	80	0	0	4.71	39.4	3.46	3.42	1.57	0.87	2.36	2.55
1	59	1	2	1	0	0	115	65	117	25.5036	75	0	0	4.99	59.8	5.02	3.42	0.66	0.99	2.06	2.43
2	55	1	2	0	0	0	110	65	106	29.7339	82	0	0	6.45	45.7	4.07	3.42	1.59	0.72	2.68	2.7
2	60	1	2	0	1	0	115	75	95	26.9357	103	0	0	17.06	36.4	5.27	3.42	0.95	0.87	2.42	2.55
1	48	1	2	0	0	0	125	75	90	27.9155	80	0	0	12.16	55.6	3.67	3.42	1.07	1.69	2.46	1.73
2	55	1	2	0	0	0	100	70	82	26.6193	84	0	0	6.68	51.7	5.47	3.42	1.11	1.69	2.47	1.73
1	75	1	2	0	0	0	105	65	92	36.0854	80	0	0	4.16	27.8	3.85	3.42	1.25	1.75	1.62	1.67
1	74	1	2	0	0	0	115	65	80	22.6562	71	0	0	4.01	48.4	3.66	3.42	0.84	0.9	2.77	2.52
2	91	1	2	0	0	0	110	70	78	25.6837	84	0	0	3.02	48.2	5.31	3.42	2.26	0.86	2.42	2.56
2	64	1	2	0	0	0	115	80	95	25.7778	85	0	0	4.55	45.8	3.62	3.42	1.18	2.6	2.3	0.82
1	49	1	3	0	0	0	115	75	78	24.6755	80	1	0	5.26	63.7	4.1	3.43	0.75	1.01	2.09	2.42
1	58	2	2	0	0	0	95	65	107	26.9274	84	0	0	4.46	65.9	4.61	3.43	1.58	0.95	2.49	2.48
2	52	1	2	1	0	1	125	75	125	35.2617	79	0	0	7.96	45.4	4.78	3.43	0.73	1.02	2.16	2.41
2	51	1	2	0	0	0	115	75	97	28.3531	92	0	0	4.83	37.1	5.42	3.43	0.95	0.99	2.11	2.44
2	49	1	2	0	0	0	115	75	94	30.0433	84	0	0	4.72	42.5	3.83	3.43	1.7	1.05	2.14	2.38
1	56	1	2	0	0	0	125	75	87	24.0569	84	0	0	5.27	56.8	3.99	3.43	0.75	0.79	2.68	2.64
1	70	1	2	1	0	0	135	75	93	21.0667	84	0	0	4.41	55.3	5.81	3.43	0.69	1.07	2.53	2.36
1	70	1	2	0	0	1	120	80	75	30.0433	62	0	0	12.11	51.8	5.34	3.43	0.77	1.09	2.45	2.34
1	55	1	2	0	0	0	110	65	90	23.8088	85	0	0	4.56	41.1	5.91	3.43	0.96	1.09	2.51	2.34
2	49	1	2	0	0	0	115	75	98	28.3771	84	0	0	5.42	49.9	5.31	3.43	1.56	1.09	2.16	2.34
1	48	1	2	0	0	0	95	65	100	26.2336	84	0	0	4.92	60	7.23	3.43	0.22	1.11	1.35	2.32
2	53	1	2	0	0	0	125	75	87	25.4375	75	0	0	5.64	47	5.05	3.43	0.23	1.16	1.1	2.27
2	55	1	2	0	0	0	115	70	87	23.3056	80	0	0	5.26	55.2	3.02	3.43	0.96	1.2	1.83	2.23
1	70	2	2	0	0	0	125	75	60	23.3377	80	0	0	4.36	62.1	4.36	3.43	1.1	1.2	1.2	2.23
1	69	1	2	1	0	0	125	75	84	22.6562	64	0	0	5.21	70	3.49	3.43	0.27	1.22	1.29	2.21
2	60	1	2	1	0	0	110	75	69	18.1077	90	0	0	5.69	44.5	4.5	3.43	1.26	1.24	1.99	2.19
1	59	1	2	1	0	1	130	75	95	27.2173	75	0	0	4.27	64	7.21	3.43	0.35	1.27	1.18	2.16
2	74	1	3	0	0	0	115	75	71	18.8271	84	0	0	6.39	32.4	5.95	3.43	1.15	1.27	2.01	2.16
1	62	1	2	1	0	0	125	65	100	28.6689	81	0	0	5.24	74.9	5.25	3.43	1.24	1.3	1.97	2.13
2	52	2	2	0	0	0	120	80	93	27.3438	88	0	0	4.62	43.8	3.84	3.43	1.45	1.34	1.92	2.09
2	49	1	2	0	0	0	135	75	94	32.039	84	0	0	5.44	49.5	4.66	3.43	0.77	1.69	2.37	1.74
2	53	1	2	0	0	0	110	65	90	21.0828	82	0	0	5.57	52	4.37	3.44	0.63	1.02	1.05	2.42
1	61	2	2	0	0	0	120	75	90	20.1092	80	0	0	5.35	35	5.26	3.44	0.25	1.02	1.39	2.42
1	73	1	2	1	0	1	130	75	109	29.6495	75	0	0	4.81	71	4.68	3.44	1.66	1.07	2.2	2.37
2	49	1	2	0	0	0	115	85	96	32.0161	88	0	0	5.73	69	5.7	3.44	0.34	1.08	1.26	2.36
2	49	1	2	1	0	0	125	65	72	20.6612	82	0	0	4.58	64	5.15	3.44	0.83	0.94	2.19	2.5
2	78	1	2	1	0	0	135	85	74	21.0007	78	0	0	4.61	59.2	3.98	3.44	1.09	1.09	2.37	2.35
2	46	2	2	0	0	0	100	65	77	22.9398	80	0	0	4.37	40.2	2.97	3.44	1.3	0.75	1.32	2.69
2	61	1	2	1	0	0	120	85	96	29.9967	88	0	0	4.48	64	5.16	3.44	0.7	0.86	1.33	2.58
2	69	1	2	0	0	0	125	75	99	28	82	0	0	5.36	44.8	5.41	3.44	1.08	1.14	2.16	2.3
1	63	1	2	0	0	0	125	80	99	26.5021	81	0	0	4.61	50.8	5.03	3.44	1.65	0.64	2.63	2.8
1	49	1	2	0	0	0	115	75	86	22.0581	82	0	0	3.91	57.9	4.77	3.44	0.53	1.19	1.94	2.25
1	81	1	2	0	0	0	115	70	83	26.7229	76	0	0	5.78	71.6	7.79	3.44	1.38	0.83	2.5	2.61
1	70	1	2	1	0	0	115	55	100	24.2188	76	0	0	6.37	64	4.25	3.44	0.55	1.2	1.1	2.24
2	69	1	2	0	0	0	105	75	94	29.903	81	0	0	6.5	43	5.8	3.44	0.83	1.22	2.01	2.22
2	53	2	2	0	0	0	120	85	104	36.738	86	0	0	5.66	58.7	5.46	3.44	0.98	1.24	2.14	2.2
2	53	2	2	0	0	0	105	75	76	24.2382	84	0	0	4.79	38.4	5.79	3.44	0.86	1.25	2.22	2.19
1	73	1	2	0	0	0	125	75	58	21.7738	87	0	0	4.32	58	8.77	3.44	0.26	0.7	1.5	2.74
2	64	1	2	0	1	0	105	70	71	19.3685	84	0	0	6.26	35.2	5.2	3.44	0.45	0.93	1.79	2.51
2	58	2	2	0	0	0	110	75	98	30.7574	78	0	0	4.83	58.6	5.1	3.44	1.1	1.32	1.68	2.12
2	53	1	2	1	0	0	140	85	94	30.4272	82	0	0	3.94	83.2	4.72	3.44	1.15	0.95	2.6	2.49
2	53	1	2	1	0	0	100	65	85	21.6441	84	0	0	3.94	83.2	4.72	3.44	1.15	0.95	2.6	2.49
1	70	1	2	0	0	0	105	65	75	21.9076	84	0	0	4.63	48.5	4.35	3.44	0.6	1.62	1.79	1.82
1	77	1	2	1	0	1	145	85	105	29.3776	88	0	0	4.78	99.2	4.9	3.44	1.55	1.73	2.27	1.71
1	53	1	2	0	0	0	100	60	88	23.5883	98	0	0	4.06	62	5.54	3.44	0.11	1.75	1.62	1.69
1	64	1	2	0	0	0	125	65	82	24.0882	84	0	0	5.28	99.2	6.72	3.44	1.02	1.79	2.44	1.65
1	78	1	2	1	0	0	125	75	112	26.1224	77	0	0	4.43	76.1	5.75	3.45	0.71	1	2.06	2.45
1	69	1	2	0	1	0	95	75	88	25.9516	88	0	0	5.2	60.5	5.23	3.45	0.93	0.93	2.22	2.52
2	51	1	2	0	0	0	115	75	84	24.3232	85	0	0	3.96	50.1	5.18	3.45	1.13	1.01	2.25	2.44
2	71	1	2	1	0	0	100	70	79	21.9138	78	0	0	4.45	59.2	7.46	3.45	1.15	1.02	2.38	2.43
2	52	1	2	0	0	0	115	75	110	25.5588	76	0	0	4.31	48.1	4.38	3.45	1.12	1.03	2.29	2.42
2	55	2	2	0	0	0	125	75	99	31.5011	76	0	0	5.66	37.7	4.31	3.45	1.02	1.05	1.86	2.4
2	49	1	2	0	0	0	115	85	95	23.7253	81	0	0	6.2	41	5.3	3.45	0.22	1.07	1.35	2.38
2	60	2	2	0	0	0	95	65	101	29.5159	71	0	0	4.53	49.8	6.83	3.45	0.88	0.99	2.04	2.46
2	51	1	2	0	0	0	125	75	89	23.7387	88	0	0	5.09	37.8	4.2	3.45	1.18	1.09	2.35	2.36
1	64	1	2	1	1	0	135	75	88	28.6215	88	0	0	4.69	65.5	3.92	3.45	1.39	1.14	2	2.31
1	81	1	2	1	0	0	135	75	107	24.6904	78	0	0	4.86	51.9	3.72	3.45	0.97	1.15	2.21	2.3
1	54	1	2	0	0	0	115	65	92	27.1816	65	0	0	4.31	64.2	6.5	3.45	0.65	1.16	2.25	2.29
2	51	1	2	0	0	0	105	65	90	21.4844	68	0	0	4.57	39.1	4.37	3.45	0.69	1.19	2.37	2.26
1	52	2	2	0	0	0	130	80	98	37.8138	79	0	0	5.54	60.5	4.38	3.45	0.84	0.89	2.21	2.56
1	70	1	2	1	0	0	130	80	88	23.3844	85	0	0	5.81	59	7.7	3.45	0.9	1.28	2.18	2.17
2	48	2	2	0	0	0	115	80	70	20.3619	84	0	0	4.06	33.1	5.68	3.45	1.05	0.94	0.96	2.51
1	49	1	2	0	0	0	115	65	82	22.4813	74	0	0	5.94	67	3.07	3.45	0.17	1.32	1.2	2.13
2	24	2	1	0	0	0	115	65	72	23.8054	94	0	0	4.18	42.5	5.01	3.45	0.49	1.32	2.23	2.13
1	62	1	2	0	0	0	95	60	75	20.83	82	0	0	5.07	38.2	2.88	3.45	0.57	1.33	2.05	2.12
2	62	2	2	1	0	0	125	65	89	31.6456	75	0	0	4.11	37.6	5.32	3.45	1.08	1.44	1.92	2.01
2	56	1	2	0	0	0	125	75	107	39.1434	69	0	0	4.09	61.4	5.6	3.45	1.37	0.85	2.52	2.6
1	69	1	2	0	0	0	115	75	84	25.0995	84	0	0	4.8	48.9	4.51	3.45	0.94	0.96	2.33	2.49
1	56	1	2	0	0	0	115	70	98	24.4646	85	1	0	6.3	53.9	4.35	3.45	0.22	0.86	2.6	2.59
2	21	1	1	0	0	0	120	65	81	21.8724	88	0	0	4.48	66	6.09	3.45	0.57	0.67	2.98	2.78
1	68	1	2	0	0	0	115	65	92	24.1672	70	0	0	5.16	72	3.12	3.46	0.17	1.01	1.52	2.45
2	48	1	2	0	0	0	95	65	84	25.1039	68	0	0	4.6	49	4.49	3.46	0.51	0.77	1.34	2.69
2	21	1	1	0	0	0	110	65	94	20.9566	93	0	0	5.33	66	3.63	3.46	0.25	1.01	1.67	2.45
2	49	1	2	0	0	0	100	65	99	27.3438	82	0	0	4.27	39.4	4.31	3.46	0.79	1.02	2.34	2.44
2	80	1	3	1	1	1	110	75	108	31.6406	84	0	0	10.79	60.5	5.25	3.46	2.34	0.71	2.57	2.75
1	70	1	2	0	0	0	120	75	91	27.7767	88	0	0	6.21	65.2	5.08	3.46	1.23	1.07	2.15	2.39
2	54	1	2	0	0	0	115	75	94	22.7694	80	0	0	4.16	55.2	4.74	3.46	0.61	1.08	2.36	2.38
1	55	1	2	0	0	0	105	65	86	23.7253	64	0	0	5.31	70.1	5.43	3.46	1.27	1.09	1.96	2.37
1	65	1	2	0	0	0	135	85	89	21.7555	71	0	0	5.46	77.6	7.99	3.46	1.32	0.9	2.4	2.56
1	61	2	2	1	0	0	145	80	110	26.4915	88	0	0	5.62	67.3	7.4	3.46	1.06	0.99	2.42	2.47
2	64	1	2	0	0	0	125	75	96	21.6311	86	0	0	5.25	52	4.26	3.46	0.13	0.98	1.2	2.48
2	54	1	2	0	0	0	110	65	74	23.7812	81	0	0	5.37	36.6	2.96	3.46	1.04	1.15	2.22	2.31
2	59	1	2	1	0	0	100	65	94	21.4573	84	0	0	4.94	45.5	4.1	3.46	0.49	1.19	1.99	2.27
2	48	1	2	0	0	0	105	75	96	29.2421	84	0	0	4.62	37	3.92	3.46	0.84	1.19	2.36	2.27
2	50	1	2	0	0	0	115	80	94	25.6312	74	0	0	5.42	49	4.35	3.46	0.77	1.2	1.27	2.26
1	71	1	2	0	0	1	120	65	94	34.4496	75	0	0	4.6	52	4.57	3.46	0.87	1.21	1.93	2.25
2	51	1	2	1	1	1	135	75	120	36.8851	84	0	0	4.51	52.7	2.78	3.46	0.96	1.23	1.89	2.23
2	53	2	2	0	0	0	125	80	104	34.1932	75	0	0	4.24	34.7	5.22	3.46	1.84	0.92	1.65	2.54
2	79	1	3	0	0	0	120	65	70	29.8303	80	0	0	4.31	78	6.07	3.46	0.12	1.32	1.38	2.14
2	53	1	2	0	0	0	120	80	83	24.8889	84	0	0	5.24	48	4.61	3.46	0.88	1.35	2.12	2.11
1	70	1	2	0	0	0	115	75	100	23.9512	80	0	0	4.29	54.8	6.4	3.46	1.62	0.85	2.64	2.61
2	60	2	3	1	0	0	115	75	71	23.6128	103	0	0	5.74	45.6	6.3	3.46	0.72	1.44	1.91	2.02
1	49	1	2	0	0	0	105	65	80	23.833	80	0	0	4.73	70.7	4.56	3.46	0.5	1.45	1.68	2.01
1	54	1	2	0	0	0	125	65	90	28.1969	71	0	0	4.75	64.9	5.65	3.46	0.81	1.68	2.33	1.78
1	69	1	2	1	0	1	95	65	94	24.623	76	1	0	5.68	35.2	4.04	3.46	1.61	1.73	1.61	1.73
2	57	1	2	0	0	0	115	75	72	19.6311	81	0	0	5.14	70	8.02	3.47	0.2	1	1.24	2.47
2	48	1	2	0	0	0	115	65	97	29.2421	82	0	0	4.55	44.9	3.44	3.47	1.34	1.01	2.59	2.46
2	64	1	2	1	0	0	115	80	96	33.2535	82	0	0	4.55	44.9	4.65	3.47	1.42	1.02	2.24	2.45
2	51	1	2	0	0	0	125	80	101	31.1111	87	0	0	6.3	47	4.84	3.47	0.62	0.84	1.59	2.63
2	54	1	2	0	0	0	120	85	88	27.3399	72	0	0	5.45	57	5.95	3.47	0.28	1.03	1.38	2.44
1	87	1	2	0	0	0	125	75	98	25.5036	79	0	0	4	155.8	6.51	3.47	1.07	1.04	2.51	2.43
1	56	1	2	0	0	0	115	75	88	28.5156	80	0	0	4.16	61.5	4.01	3.47	2.43	0.93	2.26	2.54
2	82	1	3	0	0	0	115	75	82	24.653	86	0	0	4.66	41	7.28	3.47	0.52	1.09	2.47	2.38
1	48	1	2	0	0	0	125	75	104	31.2092	84	0	0	4.82	59.4	5.03	3.47	1.01	0.93	2.69	2.54
1	67	1	2	0	0	0	130	75	103	21.4692	85	0	0	5.13	74.6	5.78	3.47	0.87	1.11	1.99	2.36
2	49	1	2	0	0	0	125	80	87	24.6097	84	0	0	4.98	46.4	3.76	3.47	1.41	1.17	1.86	2.3
2	71	1	2	1	0	1	125	75	90	28.9993	89	0	0	4.22	61.5	4.01	3.47	2.43	0.93	2.26	2.54
2	63	2	2	0	0	0	125	90	86	26.6728	84	0	0	4.38	42.5	3.76	3.47	0.81	1.21	2.19	2.26
1	60	1	2	0	0	0	125	75	93	27.0416	84	0	0	4.8	54.7	5.97	3.47	0.87	1.21	2.38	2.26
2	52	1	2	0	0	0	100	70	78	24.9989	84	0	0	5	45.4	3.67	3.47	0.94	0.95	2.34	2.52
2	65	1	2	1	0	0	105	75	90	26.2985	84	0	0	24.65	60	4.34	3.47	0.86	1.32	1.87	2.15
2	75	1	2	0	0	0	125	70	90	19.5556	92	0	0	6.61	45.9	5	3.47	1.15	0.98	1.97	2.49
2	24	2	1	0	0	0	120	85	81	22.0317	83	0	0	4.56	60	7.3	3.47	0.21	1.38	1.46	2.09
2	50	1	2	0	0	0	115	65	75	25.462	82	0	0	4.5	47.9	4.25	3.47	0.73	1.39	1.97	2.08
2	55	1	2	0	0	0	115	65	80	24.3911	70	0	0	4.2	38	4.49	3.47	1.59	0.83	2.69	2.64
1	75	1	2	1	0	0	115	75	100	23.3355	80	0	0	4.66	58.6	6.74	3.47	1.58	1.71	2.59	1.76
1	65	1	2	1	0	0	125	75	77	24.4352	88	0	0	11.96	43.3	4.01	3.47	0.46	1.88	0.96	1.59
2	76	1	3	0	0	0	145	90	83	17.4449	60	0	0	5.36	68	6.05	3.47	1.42	1.98	1.99	1.49
2	51	1	2	0	0	0	115	75	95	32.8181	63	0	0	4.56	53.1	7.49	3.47	1.44	2.2	2.6	1.27
1	55	1	2	0	0	0	115	75	99	28.6501	73	0	0	4.87	84.8	4.86	3.48	0.83	1.02	2.14	2.46
2	50	1	2	0	0	0	115	65	85	23.5556	81	0	0	5.52	52	4.54	3.48	0.31	1.03	1.02	2.45
1	50	2	2	0	0	0	110	75	98	29.0606	84	0	0	4.1	70.2	4.41	3.48	2.25	1.04	2.14	2.44
2	55	1	2	0	0	0	100	80	101	30.6293	80	0	0	5.41	32.9	4.5	3.48	0.82	1.04	2.31	2.44
1	82	1	2	0	0	0	125	75	90	26.2227	80	0	0	4.23	62.2	5.7	3.48	1.54	1.05	2.3	2.43
2	52	1	2	0	0	0	115	75	112	30.863	88	0	0	6.04	45.3	3.74	3.48	0.8	1.07	2.39	2.41
1	22	1	1	0	0	0	105	65	78	19.047	85	0	0	5.61	78	3.58	3.48	0.16	1.09	1.64	2.39
1	52	1	2	0	0	0	125	75	91	28.2828	84	0	0	4.85	70.9	4.39	3.48	1.42	0.84	2.51	2.64
2	55	1	2	0	1	0	105	60	83	22.0711	76	0	0	4.86	47.1	5.08	3.48	1.45	1.11	2.02	2.37
2	54	1	2	0	1	1	95	65	103	27.2392	80	0	0	16.49	32	4.13	3.48	2.17	1.12	2.25	2.36
1	71	1	2	0	0	0	105	65	92	23.8087	84	0	0	5.04	72.3	6.99	3.48	0.56	1.13	2.41	2.35
1	69	2	2	1	0	0	130	80	89	25.2595	83	0	0	3.92	69	6.28	3.48	0.9	1.15	2.42	2.33
1	57	1	2	1	0	0	130	75	97	29.0606	85	0	0	4.49	37.9	3.22	3.48	0.88	1.2	2.34	2.28
1	67	1	2	0	0	1	125	75	87	23.3234	84	0	0	4.19	60.3	3.68	3.48	0.68	0.94	2.42	2.54
2	84	1	3	1	0	0	130	80	85	32.2754	82	0	0	4.3	45	3.33	3.48	1.03	1.22	2.14	2.26
2	63	1	2	1	0	1	125	75	89	20.2395	84	0	0	4.93	41.8	6.71	3.48	1.14	1.23	2.13	2.25
2	65	3	2	0	0	0	105	65	82	18.9745	80	0	0	4.33	42	4.74	3.48	0.96	1.23	1.02	2.25
2	64	1	2	1	0	0	115	60	77	24.7737	82	0	0	4.53	42.9	4.04	3.48	1.36	1.25	2.01	2.23
2	49	1	2	0	0	0	115	75	66	21.9261	84	0	0	5.18	53.6	6.36	3.48	0.92	1.29	2.04	2.19
1	54	1	2	0	0	0	115	75	95	22.7732	99	0	0	6.68	56.1	4.66	3.48	0.76	0.89	2.19	2.59
2	59	1	2	0	0	0	115	80	84	21.6041	84	0	0	5.15	38.5	5.99	3.48	0.98	1.35	1.97	2.13
1	53	1	2	0	0	0	130	65	98	24.4646	80	0	0	4.22	57.7	7.41	3.48	0.97	0.94	2.23	2.54
2	75	1	3	0	0	0	110	65	99	24.2188	82	0	0	4.43	53.7	4.03	3.48	1.26	0.93	2.63	2.55
2	56	1	2	0	0	0	110	65	88	18.75	86	0	0	5.01	41.4	4.4	3.48	2.07	0.88	2.51	2.6
2	49	1	2	0	0	0	115	75	94	29.6749	71	0	0	4.01	45.8	2.27	3.48	1.12	0.91	2.16	2.57
2	58	1	2	1	1	0	130	85	108	27.8293	84	0	0	4.08	43.4	4.95	3.48	1.24	0.95	2.34	2.53
2	55	1	2	1	1	0	135	85	120	33.2265	85	0	0	4.55	59	6.75	3.48	1.4	0.95	2.4	2.53
2	76	2	2	0	0	0	135	75	75	27.4077	80	0	0	4.4	48.3	4.37	3.48	1.77	0.98	1	2.5
2	65	1	2	0	0	1	120	90	84	23.2834	89	0	0	4.78	48.2	6.36	3.48	0.72	1.59	1.79	1.89
1	67	2	2	1	0	0	125	75	105	28.4053	83	0	0	5.31	69.1	3.94	3.48	1.84	0.97	2.54	2.51
2	49	2	2	0	0	0	125	85	108	33.2986	80	0	0	5.36	42.7	3.98	3.48	1.49	0.99	2.6	2.49
1	57	1	2	0	0	0	90	65	115	29.7056	84	0	0	5.72	69	6.67	3.48	1.06	1.69	1.26	1.79
2	66	1	2	0	0	0	105	65	70	24.3948	86	0	0	4.1	51.1	6.25	3.48	1.37	0.91	2.24	2.57
1	51	1	2	0	0	0	110	75	94	28.0557	84	0	0	6.27	56	5.35	3.48	0.18	1.82	2.08	1.66
1	53	1	2	0	0	0	125	65	114	26.9274	82	0	0	5.02	65.8	5.18	3.48	1.15	0.74	2.68	2.74
2	72	1	2	0	0	0	125	77.5	70	18.5911	80	0	0	4.98	45.3	2.84	3.48	2.16	2	1.25	1.48
2	78	1	3	1	0	0	140	90	83	23.6128	74	0	0	5.39	45.8	6.49	3.49	1.29	1	2.24	2.49
2	49	1	2	0	0	0	110	70	82	23.9361	84	0	0	5.39	34.3	5.4	3.49	1.52	1.06	2.29	2.43
2	71	1	2	0	0	0	105	75	81	18.5108	77	0	0	4.81	79.1	3.96	3.49	0.94	0.95	2.19	2.54
2	49	2	2	0	0	0	105	65	117	28.0618	86	0	0	5.74	42.2	3.55	3.49	0.97	1.09	2.55	2.4
2	64	1	2	0	0	0	120	90	88	21.9363	88	0	0	4.29	30.4	4.53	3.49	1.09	1.1	2.61	2.39
2	37	3	2	0	0	0	115	70	104	25.9701	80	0	0	4.99	40	3.65	3.49	0.1	0.93	1.75	2.56
1	76	1	2	0	0	0	115	65	76	22.2222	81	0	0	4.57	69	6.17	3.49	0.88	1.15	2.16	2.34
1	56	1	2	1	0	0	125	75	97	28.8275	77	0	0	6.2	69	6.91	3.49	0.31	1.15	1.33	2.34
2	52	1	2	0	0	0	115	75	75	24.5603	79	0	0	4.91	47	8.58	3.49	0.19	1.18	1.25	2.31
1	58	1	2	0	1	0	130	75	88	23.597	89	0	0	4.79	58.8	5.74	3.49	0.92	1.19	2.21	2.3
1	57	1	2	0	0	0	110	65	97	24.0055	77	0	0	5.28	59.2	3.24	3.49	0.69	1.19	2.16	2.3
1	59	2	2	0	0	0	115	65	106	27.1664	80	0	0	4.65	81.4	5.89	3.49	0.67	1.19	1.95	2.3
2	55	1	2	0	0	0	125	85	99	28.1943	94	0	0	4.3	12	5.91	3.49	0.29	1.22	1.82	2.27
2	59	2	2	0	0	0	95	65	64	23.9361	84	0	0	4.32	38.6	3.79	3.49	0.64	1.23	2.1	2.26
2	59	1	2	0	0	0	125	80	96	30.1788	84	0	0	4.49	75.7	5.97	3.49	1.28	0.86	2.67	2.63
1	50	1	2	0	0	0	125	75	98	22.0386	84	0	0	4.81	69.7	4.88	3.49	0.9	0.94	2.51	2.55
2	61	1	2	1	0	1	110	65	92	34.2327	85	0	0	5.56	44.6	5.59	3.49	2.33	1.32	1.87	2.17
2	61	1	2	0	0	0	115	85	82	26.7094	84	0	0	4.49	48.1	4.59	3.49	1.54	0.98	2	2.51
2	60	1	2	0	0	0	115	75	107	30.2618	92	0	0	4.78	34.5	3.02	3.49	1.65	0.92	2.2	2.57
1	54	1	2	0	0	0	105	65	86	23.7812	80	0	0	5.35	61.7	6.04	3.49	1.19	0.9	2.62	2.59
1	69	1	2	0	0	0	115	75	82	25.4028	73	0	0	4.03	49.1	4.55	3.49	0.78	0.93	2.14	2.56
1	53	1	2	0	0	0	125	75	100	31.7418	88	0	0	6.1	50.9	4.34	3.49	0.8	1.77	1.97	1.72
2	81	1	3	1	0	1	125	85	112	30.3302	84	0	0	12.75	32.3	4.77	3.49	1.3	1.8	2.35	1.69
2	54	1	2	0	0	0	125	75	89	28.3531	90	0	0	4.19	20.7	4.44	3.49	1.6	1.82	1.51	1.67
2	72	3	2	0	0	1	130	80	103	29.3413	84	0	0	4.88	48	4.09	3.5	1.24	0.97	2.66	2.53
1	59	1	2	0	0	1	115	75	91	20.9573	71	0	0	5.03	60	4.33	3.5	1.02	0.88	2.31	2.62
2	56	1	2	0	0	0	125	87.5	94	31.1111	84	0	0	4.83	60	5.81	3.5	0.32	1.01	2.07	2.49
1	62	1	2	0	0	0	120	65	103	22.0932	85	0	0	4.79	37.2	4.43	3.5	0.82	0.95	2.24	2.55
2	52	1	2	0	0	0	105	75	79	22.6667	89	0	0	4.9	54.1	4.72	3.5	1.26	1.02	1.95	2.48
1	59	1	2	0	0	0	120	65	88	25.0593	65	0	0	4.86	83.7	5.2	3.5	0.81	1.03	2.25	2.47
1	72	1	2	0	0	0	145	80	90	22.4996	80	0	0	5.78	62.2	4.51	3.5	0.86	1.04	1.89	2.46
1	53	2	2	0	0	0	115	75	96	27.6638	84	0	0	4.87	66	5.4	3.5	0.3	1.05	1.63	2.45
2	53	1	2	0	0	0	105	60	100	25.5367	81	0	0	3.9	55.4	4.33	3.5	1.63	1.06	2.47	2.44
2	67	2	2	1	1	0	125	65	83	21.3675	87	0	0	4.88	41	4.51	3.5	1.24	1.09	2.17	2.41
2	65	1	2	1	1	0	115	80	97	29.9688	85	0	0	5.34	58.8	4.34	3.5	1.27	0.97	2.22	2.53
2	53	1	2	1	0	0	140	85	113	30.1162	84	0	0	4.6	50.6	4.79	3.5	1.14	1.12	2.28	2.38
2	60	1	2	0	0	0	125	85	86	20.3333	86	0	0	4.48	47.3	4.19	3.5	1.06	0.95	2.45	2.55
2	53	1	2	0	0	0	95	65	86	21.3593	84	0	0	4.36	44.3	3.59	3.5	0.6	1.19	1.98	2.31
1	62	1	2	0	0	0	105	60	96	21.83	79	0	0	6.58	71.7	5.97	3.5	0.42	1.21	1.97	2.29
1	73	1	2	1	0	0	145	85	77	22.4082	88	0	0	4.82	60.1	4.2	3.5	1	0.86	2.48	2.64
1	55	1	2	0	0	0	115	75	93	28.959	84	0	0	4.6	45.8	3.55	3.5	1.14	0.94	1.26	2.56
1	66	1	2	0	0	0	125	65	101	28.6501	72	0	0	5.01	63.1	6.2	3.5	1	0.76	2.2	2.74
2	51	1	2	0	0	0	115	65	80	23.0112	89	0	0	4.76	31	4.04	3.5	0.58	1.29	2.21	2.21
2	73	1	2	1	1	0	145	90	85	26.2227	60	0	0	5.6	41.2	4.62	3.5	1.23	1.3	0.5	2.2
2	57	2	2	0	0	0	115	80	80	28.8889	84	0	0	5.8	55.1	4.47	3.5	0.92	0.91	2.27	2.59
1	62	1	2	0	0	0	95	65	96	21.5045	66	0	0	5.04	53.5	6.49	3.5	0.68	1.3	2.24	2.2
2	57	1	2	0	0	0	125	80	80	18.591	78	0	0	5.16	50	4.81	3.5	0.26	1.32	1.49	2.18
1	51	1	2	0	0	0	120	65	87	23.833	75	1	0	5.3	12.3	3.5	3.5	1.2	1.32	1.84	2.18
2	66	2	2	0	0	0	120	75	91	25.7885	84	0	0	4.6	35	3.5	3.5	1.5	0.5	1.5	3
2	57	2	2	0	0	0	125	85	87	24.2188	80	0	0	4.43	57.8	5.84	3.5	1.47	1.41	1.2	2.09
2	65	1	3	0	0	0	115	75	63	21.1257	86	0	0	4.9	35	2.5	3.5	1.5	1.5	2.5	2
2	72	1	2	0	0	0	125	75	83	24.3232	85	0	0	4.8	30	2.5	3.5	1.5	1.5	2.5	2
1	76	1	2	1	0	0	115	75	73	21.5645	87	0	0	4.7	30	2.54	3.5	1.5	1.5	1.5	2
1	77	1	2	0	0	1	125	75	108	35.1705	80	0	0	4.7	35	3.5	3.5	0.5	1.5	1.5	2
2	65	1	2	0	0	0	115	75	100	27.2392	80	0	0	4.5	30	3.5	3.5	1.5	1.5	2.5	2
2	67	2	3	0	0	0	125	75	80	21.58	84	0	0	5.9	30	3.4	3.5	0.5	0.5	1.5	3
1	90	1	2	1	0	1	115	75	107	27.1809	84	0	0	4.6	30	3	3.5	1.5	1.5	1.5	2
2	60	1	2	0	0	0	115	75	78	21.3593	71	0	0	6.99	71	6.63	3.5	0.25	1.57	1.29	1.93
2	52	1	2	0	0	0	95	65	90	22.1003	81	0	0	4.52	43.1	4.88	3.5	0.8	1.6	1.75	1.9
2	74	2	2	0	0	0	95	65	72	24.1437	80	0	0	5.17	39.5	3.67	3.5	1.1	1.61	1.9	1.89
2	79	1	2	0	0	0	115	75	90	25.3155	78	0	0	3.91	39.2	5.01	3.5	1.01	1.62	2.71	1.88
2	81	1	3	1	0	0	110	70	80	17.6048	100	0	0	5.7	58.2	4.05	3.5	1.6	1.72	0.91	1.78
1	86	1	3	1	0	1	125	75	109	32.7919	86	0	0	4.9	30	2.8	3.5	1.5	0.5	1.5	3
2	62	1	2	1	0	1	95	65	90	24.2439	80	0	0	5.33	43	5.77	3.5	0.3	2.3	1.5	1.2
2	81	1	3	1	0	1	135	75	85	24.2439	78	0	0	3.83	59.6	2.89	3.51	1.32	0.97	2.25	2.54
2	68	1	2	0	0	0	120	85	87	20.6418	84	0	0	4.39	46.1	6.04	3.51	0.62	1.02	2.22	2.49
2	48	1	2	0	0	0	95	65	75	28.251	84	0	0	4.96	64.1	4.47	3.51	1.14	1.03	2.09	2.48
1	56	1	2	1	0	0	115	75	95	24.2188	80	0	0	5.58	49.9	4.58	3.51	2.14	1.03	2.36	2.48
1	74	1	2	0	0	0	130	75	87	24.7475	75	0	0	4.99	72.3	6.9	3.51	0.6	1.05	2.13	2.46
2	60	1	2	1	0	0	105	70	101	26.5643	82	0	0	5.07	52	4.91	3.51	1.09	1.05	2.04	2.46
2	61	1	3	1	0	0	135	95	106	29.9376	82	0	0	4.75	47.4	5.72	3.51	1.03	1.06	1.82	2.45
1	60	1	2	0	0	0	125	65	98	22.7732	78	0	0	6.09	55.6	6.54	3.51	1.57	1.08	2.29	2.43
2	52	1	2	1	0	0	135	85	112	36.5713	84	0	0	4.84	37.3	5.32	3.51	0.92	1.08	2.37	2.43
1	59	1	2	0	0	0	145	85	104	32.5577	82	0	0	5.27	89	5.07	3.51	0.31	1.09	1.2	2.42
1	60	1	2	1	1	0	145	85	94	29.7442	82	0	0	5.86	62	4.84	3.51	0.17	0.9	1.49	2.61
2	58	2	2	1	0	0	125	75	97	28.3987	88	0	0	6.17	39.3	4.36	3.51	0.81	0.96	2.31	2.55
1	51	1	2	1	0	0	115	75	107	39.5554	100	0	0	4.28	34.1	3.27	3.51	0.72	1.1	1.2	2.41
2	54	1	2	0	0	0	115	85	87	29.1749	84	0	0	6.01	47	4.4	3.51	0.47	0.89	1.61	2.62
1	59	1	2	0	0	0	135	75	103	31.6337	84	0	0	5.09	69.7	4.13	3.51	1.04	0.92	2.24	2.59
2	48	2	2	0	0	0	135	75	98	29.2101	84	0	0	5.32	47.9	5.02	3.51	2.52	1.2	1.1	2.31
2	53	1	2	0	0	0	95	65	93	25.5937	71	0	0	4.45	50.2	3.73	3.51	0.57	1.2	2.06	2.31
2	55	1	2	1	0	0	120	80	104	37.3932	84	0	0	4.3	45.2	4.11	3.51	0.99	1.21	1.87	2.3
2	49	1	2	0	0	0	125	75	96	28.0404	62	0	0	4.48	24.8	3.64	3.51	0.65	1.22	2.17	2.29
2	68	1	2	0	0	0	135	80	106	24.9199	84	0	0	4.62	39.8	3.45	3.51	1.09	1.24	2.15	2.27
2	51	1	2	0	0	0	100	70	88	23.8281	88	0	0	5.43	40	3	3.51	0.21	0.94	0.96	2.57
2	60	1	2	1	0	0	130	75	101	25.6745	64	0	0	5.29	39.7	4.7	3.51	1.22	1.28	1.89	2.23
1	55	2	2	0	0	0	125	75	100	22.2041	77	0	0	4.34	60.1	4.46	3.51	2.92	1.28	1.97	2.23
2	51	1	2	0	0	0	105	65	78	25.2363	76	0	0	4.8	46.9	4.73	3.51	1.14	1.33	2.19	2.18
2	55	2	2	1	0	0	95	65	76	22.9719	78	0	0	4.18	40	5.39	3.51	1.13	1.36	1.83	2.15
2	62	1	2	1	0	0	105	65	91	21.9261	76	0	0	5.16	40.3	4.55	3.51	0.9	1.38	2.14	2.13
2	52	1	2	0	0	0	115	85	98	28.251	76	0	0	4.88	41.4	2.3	3.51	1.68	1.41	1.86	2.1
2	49	1	2	0	0	0	110	65	86	20.7198	82	0	0	4.22	41.9	5.17	3.51	0.73	1.42	1.85	2.09
2	61	1	2	0	0	0	125	65	66	20.8292	92	0	0	4.01	40	5.14	3.51	0.36	1.42	1.16	2.09
2	63	1	2	0	0	0	110	65	94	18.4265	86	0	0	4.07	42.8	5.96	3.51	0.93	1.45	1.87	2.06
1	55	1	2	0	0	0	115	65	98	25.3155	79	0	0	4.19	56.7	4.51	3.51	0.64	0.86	2.34	2.65
1	71	1	2	1	0	0	145	80	99	24.1115	81	0	0	4.93	87.4	4.24	3.51	1.69	1.81	2.2	1.7
2	57	2	2	1	0	0	115	75	81	25.6745	82	0	0	4.58	64.4	5.71	3.52	1.15	1.02	2.28	2.5
1	49	1	2	1	0	0	135	75	86	25.1532	82	0	0	5.52	28	3.54	3.52	0.43	1.06	1.55	2.46
1	70	1	2	0	0	0	125	70	88	26.8977	80	0	0	5.53	156.1	8.6	3.52	1.33	0.9	2.73	2.62
2	50	1	2	0	0	0	90	60	86	23.7253	85	0	0	6.32	44	5.42	3.52	0.55	0.89	1.39	2.63
2	55	1	2	1	0	0	115	75	106	29.1545	103	0	0	4.73	44.7	3.25	3.52	1.68	1.11	2.23	2.41
1	52	2	2	0	0	0	115	65	86	31.25	87	0	0	4.33	56.3	4.46	3.52	1.44	1.11	1.94	2.41
2	48	1	2	0	0	0	100	70	82	21.0007	84	0	0	4.14	52.1	4.77	3.52	1.23	1.12	2.47	2.4
2	69	1	2	1	0	0	120	80	104	29.9967	86	0	0	7.5	12.4	3.4	3.52	1.11	1.14	2.43	2.38
1	50	2	2	0	0	0	105	65	94	27.7177	84	0	0	4.65	46.9	5.34	3.52	0.71	0.6	0.5	2.92
2	64	2	2	0	0	0	125	75	102	23.5556	70	0	0	4.24	46.4	4.17	3.52	1.05	0.99	2.11	2.53
2	51	1	2	0	0	0	125	85	99	31.6346	92	0	0	4.85	51.3	4.3	3.52	0.69	1.4	2.35	2.12
2	62	1	2	0	0	1	95	65	87	28.1625	84	0	0	8.78	29.1	3.18	3.52	0.94	1.48	2.05	2.04
2	53	1	2	0	0	0	105	70	80	21.5169	75	0	0	4.6	63.5	4.11	3.52	1.4	1.7	0.9	1.82
2	53	1	2	0	0	0	115	65	80	20.4518	82	0	0	4.46	41.1	4.9	3.52	1.27	1.7	2	1.82
2	56	2	2	0	0	0	115	75	91	24.3824	71	0	0	4.25	28.5	5.2	3.52	0.52	0.98	0.95	2.54
2	59	1	2	1	0	0	135	75	82	23.4566	80	0	0	4.53	22.5	4.67	3.53	1.26	1	1.39	2.53
1	89	1	3	1	0	1	120	65	90	25.7117	85	0	0	5.93	65.5	5.34	3.53	1.25	1.01	2.29	2.52
1	62	1	2	0	0	0	105	65	106	27.7778	76	0	0	4.15	50.5	6.29	3.53	0.91	1.02	2.45	2.51
2	61	1	2	0	0	0	115	65	85	24.4561	82	0	0	4.57	42	3	3.53	0.78	1.03	2.11	2.5
1	52	1	2	0	0	0	125	80	94	22.921	80	0	0	5.14	59	4.29	3.53	1.45	1.03	2.32	2.5
1	77	1	2	0	0	0	125	75	98	25.6055	79	0	0	5.17	94.4	8.36	3.53	1.37	0.94	0.96	2.59
2	60	1	2	1	0	0	125	90	103	38.1869	86	0	0	5.64	44.3	4.09	3.53	1.01	0.9	2.4	2.63
2	60	1	2	0	0	0	135	80	112	34.4132	96	0	0	5.13	49.7	4.87	3.53	0.76	0.85	2.44	2.68
1	62	1	2	1	0	0	125	75	81	23.4566	84	0	0	5.24	48.8	5.15	3.53	0.66	1.08	2.3	2.45
1	51	1	2	0	0	0	115	75	93	25.1559	84	0	0	4.97	64.9	5.14	3.53	0.68	0.96	2.58	2.57
2	42	2	2	0	0	0	115	75	77	23.2446	75	0	0	5.33	49	3.42	3.53	0.45	0.47	1.68	3.06
1	58	2	2	1	0	0	115	65	116	28.075	75	0	0	5.86	73	3.4	3.53	0.35	1.12	0.12	2.41
2	49	2	2	1	0	0	105	75	103	28.5156	84	0	0	5.46	47.5	3.98	3.53	0.72	0.92	2.01	2.61
1	67	1	3	1	0	1	125	75	68	23.8728	76	0	0	5.45	55	7.52	3.53	1.5	1.15	2.15	2.38
1	79	2	2	0	0	1	115	65	71	18.3655	93	0	0	4.81	42.7	3.04	3.53	0.76	1.18	2.24	2.35
1	52	2	2	0	0	1	125	75	91	29.0006	80	1	0	11.94	43.6	4.74	3.53	1.48	0.87	2.65	2.66
1	83	1	2	0	0	0	130	75	81	21.7784	75	0	0	4.42	44.8	5.46	3.53	0.82	1.22	2.33	2.31
1	50	1	2	0	0	0	105	65	78	20.3244	72	0	0	4.69	55.8	5.1	3.53	1.23	0.99	2.16	2.54
1	46	1	2	0	0	0	125	65	89	27.2932	69	0	0	5.34	86	4.47	3.53	0.37	1.25	2.12	2.28
2	72	1	2	0	0	0	105	65	97	26.2227	82	0	0	6.12	79	5.01	3.53	1.09	1.29	1.72	2.24
2	50	1	2	0	0	0	120	75	75	19.4734	85	0	0	4.89	54.4	5.09	3.53	1.23	1.29	2.14	2.24
1	53	3	2	0	0	0	125	75	98	21.0498	78	1	0	6.3	60.9	4.58	3.53	0.74	1.33	1.93	2.2
1	72	1	2	0	0	0	115	65	87	24.093	94	0	0	4.19	12	6.84	3.53	0.7	0.96	1.65	2.57
2	68	1	2	0	0	0	115	70	93	19.7239	72	0	0	5.24	47	5.3	3.53	1.32	1.42	1.6	2.11
2	66	1	2	1	0	0	115	75	75	20.1348	71	0	0	4.13	44	3.21	3.53	0.54	2.1	1.24	1.43
1	64	1	2	0	0	0	115	75	56	30.478	87	0	0	4.91	44.6	5.29	3.53	1.84	2.3	1.25	1.23
2	62	1	2	0	0	1	115	65	97	26.0262	84	0	0	4.01	27	4.43	3.54	1.68	1.06	1.98	2.48
2	54	1	2	0	0	0	115	70	86	27.5556	100	0	0	4.14	47	6.42	3.54	0.77	1.07	1.58	2.47
1	48	1	2	0	0	0	120	65	88	22.3133	65	0	0	4.31	53.8	4.82	3.54	0.65	1.07	2.21	2.47
1	60	2	2	0	0	0	110	65	89	23.3844	84	0	0	5.29	69.8	5.65	3.54	1.57	0.97	2.57	2.57
2	68	1	3	0	0	0	115	80	97	21.7784	100	0	0	4.75	47.5	4.65	3.54	1.3	1.11	2.26	2.43
2	59	1	2	0	0	0	130	85	120	26.9127	88	0	0	5.39	54.5	3.32	3.54	1.33	0.98	2.17	2.56
2	57	2	2	0	0	0	125	75	86	21.6441	79	0	0	5.7	53	4.44	3.54	0.31	1.17	1.61	2.37
1	77	1	3	0	0	0	125	75	86	23.5883	84	0	0	4.5	36.6	3.97	3.54	0.51	1.2	1	2.34
2	62	1	2	0	0	0	115	75	90	25.721	83	0	0	4.36	35.9	4.11	3.54	0.87	1.2	2.07	2.34
1	50	1	2	0	0	0	115	75	82	22.7694	84	0	0	4.43	48.2	4.74	3.54	0.93	1.2	2.3	2.34
2	49	1	2	0	0	0	115	65	90	31.9311	82	0	0	5.78	43	3.69	3.54	1.39	0.87	2.58	2.67
1	53	1	2	0	0	0	105	60	84	24.2587	84	0	0	4.53	49.4	6.35	3.54	2.02	0.96	2.22	2.58
2	52	1	2	0	0	0	120	80	97	29.2421	84	0	0	5.15	51.9	4.96	3.54	1.54	0.92	2.32	2.62
2	58	1	2	1	0	0	125	80	109	31.2026	78	0	0	5.56	33.3	4.9	3.54	1.03	0.86	2.39	2.68
1	74	1	3	1	0	0	135	75	105	24.7676	84	0	0	5.79	54.3	6.17	3.54	0.82	1.3	2.16	2.24
1	50	1	2	0	0	0	115	75	95	25.2826	84	0	0	4.25	46.6	6.15	3.54	0.77	1.32	2.11	2.22
2	56	1	2	1	0	0	105	75	82	23.2446	84	0	0	4.25	38.2	4.84	3.54	1.1	0.96	2.14	2.58
1	64	1	2	0	0	0	135	80	106	25.8645	80	0	0	5.23	73.3	6.42	3.54	1.17	0.89	2.67	2.65
1	57	1	2	0	0	0	115	75	95	28.6288	84	0	0	4.7	71.7	6.25	3.54	0.95	0.93	2.52	2.61
2	48	1	2	0	0	0	125	70	88	22.3081	81	0	0	4.6	48.5	4.26	3.54	0.37	1.72	1.8	1.82
1	75	1	2	1	0	0	115	75	110	31.25	88	0	0	3.92	49.3	3.81	3.54	1.45	0.87	2.72	2.67
2	71	1	2	1	1	0	135	85	105	29.1545	84	0	0	6.3	51.6	4.52	3.54	1.56	1.82	2.74	1.72
1	78	1	3	0	0	0	115	75	98	26.8352	84	0	0	5.29	61	5.32	3.55	1.05	1	2.56	2.55
2	68	1	2	1	0	0	120	65	102	25.8876	69	0	0	4.86	40.9	4.59	3.55	0.77	1.02	2.65	2.53
2	73	1	2	0	0	0	115	65	79	23.2834	84	0	0	8.23	41	6.12	3.55	1.06	0.99	2.04	2.56
2	69	1	2	1	0	0	115	80	102	27.4077	84	0	0	5.12	53.1	4.41	3.55	1.64	1.06	2.11	2.49
1	76	1	2	0	0	0	135	65	98	24.8591	98	0	0	5.05	130.6	8.56	3.55	1.21	1.07	2	2.48
2	63	1	3	0	0	0	105	65	75	21.2183	60	0	0	4.97	26.1	3.73	3.55	0.91	1.08	2.41	2.47
2	67	1	2	1	0	0	95	65	97	30.7809	84	0	0	5.6	62.6	4.9	3.55	1.68	1.09	2.29	2.46
1	74	1	2	1	0	0	135	85	92	20.202	80	0	0	4.5	47.5	4.17	3.55	0.77	1.1	0.8	2.45
1	63	1	2	1	0	0	115	65	91	25.721	72	0	0	4.91	49.1	5.9	3.55	0.84	0.91	2.26	2.64
1	77	2	2	1	1	0	110	65	89	20.0773	75	0	0	6.62	58	7.93	3.55	0.27	1.12	1.25	2.43
1	64	1	2	0	0	0	110	75	88	26.6667	85	0	0	6.37	47	7.09	3.55	1.22	1.14	2.43	2.41
2	52	1	2	1	0	0	115	75	74	28.1337	74	0	0	4.31	37.6	3.18	3.55	0.74	1.2	0.9	2.35
1	63	1	2	1	0	0	125	85	108	24.0238	79	0	0	6.47	86.8	6.69	3.55	0.78	1.21	1.9	2.34
2	52	1	2	1	0	0	105	75	104	33.3205	76	0	0	6.18	41	4.77	3.55	0.11	1.22	1.19	2.33
2	52	1	2	0	0	0	105	70	99	24.6094	84	0	0	4.46	43	4.63	3.55	0.3	1.24	1.2	2.31
2	59	1	2	1	0	0	95	65	90	30.2618	84	0	0	4.5	55.1	6.47	3.55	1.33	0.93	2.08	2.62
2	51	1	2	0	0	0	115	75	95	25.5588	72	0	0	6.37	51	3.09	3.55	1.36	0.86	2.33	2.69
2	48	1	2	0	0	0	125	75	98	25.9695	103	0	0	4.15	34.3	3.48	3.55	0.84	1.28	2.38	2.27
1	71	1	2	1	0	0	130	75	81	20.5688	76	0	0	4.59	52.3	4.21	3.55	1.37	0.93	0.95	2.62
2	54	2	2	0	0	0	125	75	85	21.6311	80	0	0	5.55	50	4.28	3.55	0.3	1.37	1.68	2.18
2	52	1	2	0	0	0	125	85	94	31.1856	83	0	0	4.21	39.4	2.94	3.55	1.33	0.85	2.51	2.7
2	50	1	2	0	0	1	125	85	86	24.5578	74	0	0	27.64	41.3	4.62	3.55	1.45	0.96	2.04	2.59
2	50	1	2	0	0	0	105	65	78	26.5239	80	0	0	4.55	40.6	5.34	3.55	0.99	1.48	1.82	2.07
1	64	1	2	0	0	1	125	75	106	27.2817	86	0	0	5.3	58.3	2.91	3.55	1.31	1.8	2.57	1.75
1	68	1	2	1	0	0	125	65	76	20.0796	72	0	0	4.03	59.5	3.41	3.55	1.47	1.8	2.58	1.75
1	69	1	2	0	0	0	125	80	98	22.7583	81	0	0	4.98	55.9	4.41	3.55	1.07	2.3	2.14	1.25
1	60	1	2	0	0	1	125	75	109	29.0174	79	0	0	4.39	71.1	4.25	3.56	1.25	0.96	1.36	2.6
2	51	2	2	0	0	0	105	65	82	24.5603	84	0	0	4.51	41.1	5.46	3.56	1.11	1.01	2.52	2.55
1	48	2	2	0	0	0	115	75	86	23.4236	80	0	0	4.34	45.5	7.85	3.56	0.3	0.85	2.71	2.71
2	47	1	2	0	0	0	105	65	99	31.9122	82	0	0	4.14	32.3	3	3.56	1.42	1.01	2.49	2.55
1	52	2	3	0	0	0	115	65	105	26.1066	81	0	0	6.02	85	6.12	3.56	1.13	0.88	1.43	2.68
2	56	1	2	0	0	0	115	75	90	25.7812	94	0	0	6.2	29.4	4.53	3.56	0.91	0.99	2.15	2.57
2	57	1	2	0	0	0	130	75	98	32.1799	72	0	0	4.82	54.7	6.25	3.56	1.07	1.06	2.39	2.5
1	61	1	2	0	0	0	115	65	95	22.6562	84	0	0	4.36	71	5.42	3.56	0.21	0.96	1.66	2.6
2	75	1	3	0	0	0	115	75	99	31.6263	73	0	0	4.82	55.2	4.3	3.56	1.27	1.11	2.47	2.45
1	56	1	2	1	0	0	135	75	112	36.3281	84	0	0	4.49	51.3	4.96	3.56	1.46	1.12	2.23	2.44
1	53	1	2	0	0	0	120	65	78	22.4996	83	0	0	4.77	45.9	4.8	3.56	1.57	0.92	2.58	2.64
1	60	1	2	0	0	0	115	75	99	26.5021	74	0	0	4.87	71.1	5.89	3.56	1.53	0.98	2.3	2.58
2	51	1	2	0	0	0	125	75	85	25.1039	80	0	0	5.4	48	3.07	3.56	1.13	1.15	2.03	2.41
2	52	1	2	0	0	0	130	75	81	26.1427	84	0	0	4.87	54.7	5.55	3.56	0.99	1.16	2.36	2.4
1	53	1	2	1	0	0	125	75	95	28.257	87	0	0	5.38	76.8	5.75	3.56	1.15	0.83	2.36	2.73
1	71	1	2	0	0	0	115	75	84	25.5296	84	0	0	4.94	77.6	7.04	3.56	1.35	1.2	2.45	2.36
2	60	1	2	0	0	0	125	75	81	22.0741	86	0	0	4.9	59	7	3.56	0.42	1.24	2.15	2.32
2	80	2	2	1	0	1	105	70	80	21.6413	80	0	0	4.23	58	5.82	3.56	1.96	1.24	0.6	2.32
1	47	1	2	0	0	0	135	75	94	20.7031	84	0	0	4.07	73	8.02	3.56	0.53	1.25	2	2.31
2	59	1	2	0	1	0	115	85	91	21.0517	95	0	0	4.9	44.5	2.85	3.56	1.1	1.26	2.27	2.3
1	50	1	2	0	0	0	125	65	106	26.2976	68	0	0	5.12	60	5.88	3.56	1.81	0.86	2.36	2.7
1	54	1	2	0	0	0	95	65	96	25.6055	62	0	0	4.58	58.7	6.58	3.56	0.83	0.76	2.38	2.8
2	59	1	2	0	0	0	105	75	78	21.4536	68	0	0	5.17	44	4.45	3.56	0.84	1.29	1.9	2.27
1	72	2	2	1	0	0	115	65	91	22.8624	71	0	0	5	65.4	7.52	3.56	0.41	1.29	1.9	2.27
2	48	1	2	0	0	0	125	85	100	25.5661	80	0	0	4.35	59	4.65	3.56	1.58	0.85	2.5	2.71
2	54	1	2	0	0	0	105	75	88	24.2382	87	0	0	4.59	41.2	2.7	3.56	0.82	1.3	1.92	2.26
2	52	1	2	0	0	0	115	75	56	20.8889	80	0	0	4.86	45.7	5.27	3.56	0.85	1.31	2.11	2.25
1	54	1	2	1	0	0	140	75	93	22.2656	85	0	0	4.85	29.5	2.78	3.56	1.24	0.94	2.42	2.62
1	58	2	2	0	0	0	115	75	100	29.34	85	1	0	4.04	67.5	5.42	3.56	1.31	0.99	2.47	2.57
2	49	1	3	0	0	0	105	65	98	20.5761	88	0	0	5.11	39	4.34	3.56	0.67	1.54	1.84	2.02
1	58	1	2	0	0	0	105	75	74	19.3337	74	0	0	4.57	58.3	2.58	3.56	0.61	1.58	1.71	1.98
2	58	1	2	0	0	0	105	75	86	25.3902	84	0	0	6.44	37.1	7.36	3.56	0.87	1.62	2	1.94
[truncated: 5,648 more rows]
